# Supplementary material
Source: Research Square preprint supplement (doi:10.21203/rs.3.rs-9053327/v1)
Supplement: Supplementary file 1 [file 7c3e474ff14441f0514cbf81.xlsx]

## Sheet: Table S1
Gene Name	Identifier	Genomic location	Genomic Sequence	Protein Sequence	Molecular Weight (Da)	Isoelectric Point
Glyma.10G065900	GmROS2-1	Gm10: 6332746…6349922	17176	2014	224111	6.66
Glyma.13G151000	GmROS2-2	Gm13: 26456256…26468220	11964	1993	221824	6.28
Glyma.03G190800	GmROS1	Gm03: 43456673…43468599	11926	1742	195574	6.48
Glyma.20G188300	GmDME1-1	Gm20: 45803197…45815475	12278	1826	206654	6.4
Glyma.10G202150	GmDME1-2	Gm10: 47166957…47178887	11930	1866	210873	6.35

## Sheet: Table S2
Identified DML-like genes from muliple land plant species.
Species	Gene Names	AA Length	AA Sequence	Identifier	Chromosome Location	Database Used	Genome Version	Glycosylase Domain	C-terminus (zf-CXXC or RRM Demeter)
A. thaliana (thale cress)	AT2G36490.1	1393	MEKQRREESSFQQPPWIPQTPMKPFSPICPYTVEDQYHSSQLEERRFVGNKDMSGLDHLSFGDLLALANTASLIFSGQTPIPTRNTEVMQKGTEEVESLSSVSNNVAEQILKTPEKPKRKKHRPKVRREAKPKREPKPRAPRKSVVTDGQESKTPKRKYVRKKVEVSKDQDATPVESSAAVETSTRPKRLCRRVLDFEAENGENQTNGDIREAGEMESALQEKQLDSGNQELKDCLLSAPSTPKRKRSQGKRKGVQPKKNGSNLEEVDISMAQAAKRRQGPTCCDMNLSGIQYDEQCDYQKMHWLYSPNLQQGGMRYDAICSKVFSGQQHNYVSAFHATCYSSTSQLSANRVLTVEERREGIFQGRQESELNVLSDKIDTPIKKKTTGHARFRNLSSMN…	AtROS1	2	TAIR	TAIR10	X	X
	AT5G04560.2	1987	MNSRADPGDRYFRVPLENQTQQEFMGSWIPFTPKKPRSSLMVDERVINQDLNGFPGGEFVDRGFCNTGVDHNGVFDHGAHQGVTNLSMMINSLAGSHAQAWSNSERDLLGRSEVTSPLAPVIRNTTGNVEPVNGNFTSDVGMVNGPFTQSGTSQAGYNEFELDDLLNPDQMPFSFTSLLSGGDSLFKVRQYGPPACNKPLYNLNSPIRREAVGSVCESSFQYVPSTPSLFRTGEKTGFLEQIVTTTGHEIPEPKSDKSMQSIMDSSAVNATEATEQNDGSRQDVLEFDLNKTPQQKPSKRKRKFMPKVVVEGKPKRKPRKPAELPKVVVEGKPKRKPRKAATQEKVKSKETGSAKKKNLKESATKKPANVGDMSNKSPEVTLKSCRKALNFDLENPGDA…	AtDME	5	TAIR	TAIR10	X	X
	AT3G10010.1	1332	MEVEGEVREKEARVKGRQPETEVLHGLPQEQSIFNNMQHNHQPDSDRRRLSLENLPGLYNMSCTQLLALANATVATGSSIGASSSSLSSQHPTDSWINSWKMDSNPWTLSKMQKQQYDVSTPQKFLCDLNLTPEELVSTSTQRTEPESPQITLKTPGKSLSETDHEPHDRIKKSVLGTGSPAAVKKRKIARNDEKSQLETPTLKRKKIRPKVVREGKTKKASSKAGIKKSSIAATATKTSEESNYVRPKRLTRRSIRFDFDLQEEDEEFCGIDFTSAGHVEGSSGEENLTDTTLGMFGHVPKGRRGQRRSNGFKKTDNDCLSSMLSLVNTGPGSFMESEEDRPSDSQISLGRQRSIMATRPRNFRSLKKLLQRIIPSKRDRKGCKLPRGLPKLTVASKL…	AtDML2	3	TAIR	TAIR10	X	X
	AT4G34060.3	1105	MEFSIDRDKNLLMVVPETRIKTKQFEKVYVRRKSIKLPQNSVIFPHEIKDRGEEESKEKEFFHQDGSQHTYQNGETKNSKEHERKCDESAHLQDNSQTTHKKKEKKNSKEKHGIKHSESEHLQDDISQRVTGKGRRRNSKGTPKKLRFNRPRILEDGKKPRNPATTRLRTISNKRRKKDIDSEDEVIPELATPTKESFPKRRKNEKIKRSVARTLNFKQEIVLSCLEFDKICGPIFPRGKKRTTTRRRYDFLCFLLPMPVWKKQSRRSKRRKNMVRWARIASSSKLLEETLPLIVSHPTINGQADASLHIDDTLVRHVVSKQTKKSANNVIEHLNRQITYQKDHGLSSLADVPLHIEDTLIKSASSVLSERPIKKTKDIAKLIKDMGRLKINKKVTTMI…	AtDML3	4	TAIR	TAIR10	X	X
G. max (dom. soybean)	Glyma.10g065900.3	2014	MEVGEMDRKETQVEVPWSPGPPIKPVPMKPVPIYMPEERNQMDHLANGAVACAEFSLGQDKIGGSGDGSNVAGYSGKTCEQIVSDAVSSYRKLGFCEQLLAVEAESRNISVTQGNNDGLKNPFVPPLVLDNVLDPQETYIACCSMKSSQDTSYILDNANKEESRQIASMQVNMEEKDPGREERNVTANKLDNNVAPNSKELCDPAMEFAAVSSPVKENHNPDNGSSHDTDLNKTPQQKPRRRKHRPKVIKEGKPKRTRKPATPKPVQSKEKQPVKRKYVRKNALNKTSTPPTEETGELTKEMSCKRSLNFDIGTTYESSAAIENTRTLLGKENGVLVQETNVGPAFDLNTSMKQASNSYMSLPEDTQALNTSSGRKSSGTKPEENPPPKRKYVKRKGVN…	GmROS2-1	10	JGI Phytozome	G. max Wm82.a6.v1	X	X
	Glyma.13g151000.1	1993	MEVGEMDRKEPQVEVPWSPGTPIKAVPMKPMPICSPGERNQMGHHANGAVACDEFSHGQDKIGGLGDGSNVATDGGKTCEPTDSDAVSNYSKLGFCEQLFAVEAESRNSSVTQGNNDGLKNPFVPSFILDNVQDPQETYIACCSMKTSQDTLFTLDNANKEGIKIASMQVNMEEKDPGGEERNAPANKLDNNVPPNSKELCDPAMEFAAVSSPLKENHNPDKGSSHDTDLNKTPQQKPRRRKHRPKVIKEGKPKRTRKPATPKPVQPKENTPVKRKYVRKNTVNKTSTPPTEEARELSKEMSCKRSLNFDIGTTDESSAAIDNTTALLGKENGILVQETNVGSAFDLNTSMKQASNSYMSLPEDKQALNTSPSRRKSSGTKPEENTPPKRKYVRRKGVN…	GmROS2-2	13	JGI Phytozome	G. max Wm82.a6.v1	X	X
	Glyma.03g190800.9	1742	MEVGETERNKLQGQVPWVPTTPLMPILPKPGPIWTPMEGNHLYSHSNGLTACFEPSCCAEINNWSHPRSEPVVLAYGNAKTRVPISFDEIPSSSNGIAELLTQGDAPSAYSNATHAGFFNQFAHAFNAQFNPHPTYALLSHQYHLSREEPFVNTVHDQFQDLQAGTSYFSYCSKTFPQIAPHLDNAIAAETRQDAMTQMTIEERNREGEEKNVPAAKCNNPHSKLYDPVTEIAAVSTPHKENHNHKEISHDFDLNKTPQPKPRRRKHRPKVIKEGKSKRTSKQVNAEVLSKEKLTDKRKARRKGLNTTSTPQTEMTGEWTKPLMPESAKKTCRRSLNFDIGEPRDDNSAYGETMHFGRDTSVVIEETRAWMIAHNGHEKSAKTLSKSVAQSSPNDLNST…	GmROS1	3	JGI Phytozome	G. max Wm82.a6.v1	X	X
	Glyma.20g188300.2	1826	MFSTLPHNTFPGNFRLSMMNFGKQLLGQDERQLEMNNTWVPIPTEKLVQLTSNTPSDWPVNQMRRPNYQEIRLPGSDYMKEKSLHYYPGPNQNLPLIGQTSQTGENKTFDGHLMNRNSVLDHIPGSYTQPWHYESNGSNSNTLEQLLKKNISNIDSANRNLDANNNMAARNPLLSMFYPQASSNVSDPYAGVQRGNIHSASDIVFKEANRLLFPNKNSEIDGSNSNSLLNNDIHCSVPNQLEGFFSEITYGDSYHNYNLNYVPIAEAGVTASFTNSLQSVPKMMDQLKFVDNQFFTIPDYMIAESTSQEKDKQKTSVSATENEFQEHCVGLLQQIVDSSPAAISTTYGDQKGSDNICGKGSDLGFDLNKTPEQKAPQRRKHRPKVIKEAKPKSTRKPAT…	GmDME1-1	20	JGI Phytozome	G. max Wm82.a6.v1	X	X
	Glyma.10g202150.1	1866	MGEQPHDRLSMNFGKQLLGQDDRQFEMNNTWVPIPPEKLIQLTSNTPSDWPVNQMSGPNYQEISVPGSDYMKEKLMHYPGPHQNLPLMGQIGHQTRENKMFDGKLMHRNSVLDYIPGSYTQPWHYESNGSNSNTSEQLLKKDITNIDSANRNLDVNNNMAARNPLLSMFYPQASSDMSDPYAGVQRCNIHSALDILFREANSLLFPNRNSEFGGSSSNSLLNNDIHCSVPNQLEGFFSEIPYGDPYHNYNLNYVPIAEAGTTASFTNSLQSVPAEAGATASFTNSLQSVPAEADATASFTNSLQSVPKLMDQLKFVDNQFFTIPDYIIAESTSQEKDKQKDLVSSTQNEVREHCDGLLQENVDSSSAAISTTYGDQKGSDNIRGKGSDLGFDLNKTPEQ…	GmDME1-1	10	JGI Phytozome	G.max Wm82.a6.v1	X	X
G. soja (wild soybean)	GlysoPI483463.10g060200.1	2013	MEVGEMDRKETQVEVPWSPGPPIKPVPMKPVPIYMPEERNQMDHLANGAVACAEFSLGQDKIGGSGDGSNVAGYSGKTCEQIVSDAVSSYRKLGFCEQLLAVEAESRNISVTQGNNDGLKNPFVPPLVLDNVLDPQETYIACCSMKSSQDTSYILDNANKEESRQIASMQVNMEEKDPGREERNVTANKLDNNVAPNSKELCDPAMEFAAVSSPVKENHNPDNGSSHDTDLNKTPQQKPRRRKHRPKVIKEGKPKRTRKPATPKPVQSKEKQPVKRKYVRKNALNKTSTPPTEETGELTKEMSCKRSLNFDIGTTYESSAAIENTRTLLGKENGVLVQETNVGPAFDLNTSMKQASNSYMSLPEDTQALNTSSGRKSSGTKPEENPPPKRKYVKRKGVN…	GsROS1	10	JGI Phytozome	G. soja v1.1	X	X
	GlysoPI483463.20g152600.1	1819	MGEQPHNRLSMMNFGKQLLGQDERQLEMNNTWVPIPTEKLVQLTSNTPSDWPVNQMRRPNYQEIRLPGSDYMKEKSLHYYPGPNQNLPLIGQTSQTGENKTFDGHLMNRNSVLDHIPGSYTQPWHYESNGSNSNTLEQLLKKNISNIDSANRNLDANNNMAARNPLLSMFYPQASSNVSDPYAGVQRGNIHSASDIVFKEANRLLFPNKNSEIGGSKSNSLLNNDIHCSVPNQLEGFFSEITYGDSYHNYNLNYVPIAEAGVTASFTNSLQSVPKMMDQLKFVDNQFFTIPDYMIAESTSQEKDKQKTSVSATENEFQEHCVGLLQQIVDSSPAAISTTYGDQKGSDNICGKGSDLGFDLNKTPEQKAPQRRKHRPKVIKEAKPKSTRKPATQKTQMKE…	GsDME1	20	JGI Phytozome	G. soja v1.1	X	X
	GlysoPI483463.13g117300.1	1993	MEVGEMDRKEPQVEVPWSPGTPIKAVPMKPMPICSPGERNQMGHHANGAVACDEFSHGQDKIGGLGDGSNVATDGGKTCEPTDSDAVSNYSKLGFCEQLFAVEAESRNSSVTQGNNDGLKNPFVPSFILDNVQDPQESYIACCSMKTSQDTLFTLDNANKEGIKIASMQVNMEEKDPGGEERNAPANKLDNNVPPNSKELCDPAMEFAAVSSPLKENHNPDKGSSHDTDLNKTPQQKPRRRKHRPKVIKEGKPKRTRKPATPKPVQPKENTPVKRKYVRKNTVNKTSTPPTEEARELSKEMSRKRSLNFDIGTTDESSAAIDNTTALLGKENGILVQETNVGSAFDLNTSMKQASNSYMSLPEDKQALNTSPSRRKSSGTKPEENTPPKRKYVRRKGVN…	GsROS2	13	JGI Phytozome	G. soja v1.1	X	X
	GlysoPI483463.03g152500.1	1741	MEVGETERNKLQGQVPWVPTTPLMPILPKPGPIWTPMEGNHLYSHSNGLTACFEPSCCAEINNWSHPRSEPVVLAYGNAKTRVPISFDEIPSSSNGIAELLTQGDAPSAYSNATHAGFFNQFAHAFNAQFNPHPTYALLSHQYHLSREEPFVNTVHDQFQDLQGTSYFSYCSKAFPQIAPHLDNAIAAETRQDAMTQMTIEERNREGEEKNVPAAKCNNPHSKLYDPVTEIAAVSTPHKENHNHKEISHDFDLNKTPQPKPRRRKHRPKVIKEGKSKRTSKQVNAEVLSKEKLTDKRKARRKGLNTTSTPQTEMTGEWTKPLMPESAKKTCRRSLNFDIGEPRDDNSAYGETMHFGRDTSVVIEETRAWMIAHNGHEKSAKTLSKSVAQSSPNDLNSTG…	GsROS3	3	JGI Phytozome	G. soja v1.1	X	X
	GlysoPI483463.10g169200.1	1844	MNFGKQLLGQDDRQFEMNNTWVPIPPEKLIQLTSNTPSDWPVNQMSGPNYQEISVPGSDYMKEKLMHYPGPHQNLPLMGQIGHQTRENKMFDGKLMHRNSVLDYIPGSYTQPWHYESNGSNSNTSEQLLKKDITNIDSANRNLDVNNNMAARNPLLSMFYPQASSDMSDPYAGVQRCNIHSALDILFREANSLLFPNRNSEFGGSSSNSLLNNDIHCSVPNQLEGFFSEIPYGDPYHNYNLNYVPIAEAGTTASFTNSLQSVPAEAGATASFTNSLQSVPAEADATASFTNSLQSVPKLMDQLKFVDNQFFTIPDYIIAESTSQEKDKQKDLVSSTQNEVREHCDGLLQENVDSSSAAISTTYGDQKGSDNIRGKGSDLGFDLNKTPEQKATQRRKHRP…	GsDME2	10	JGI Phytozome	G. soja v1.1	X	X
P. vulgaris (common g bean)	Phvul.007g223600.1	2209	MEVGEMGRKEPEVEVPLVPATPIKPVPLKPVPIYTPGEINQMGYHANGAVACVEFLIGQEKLCRSDVGSNVAGDCGKTCEHTASDAASSFSKLGFCEHLFAVEAESRNSSVTQGNNEGLKNPFVPSVILDNMRDPQETYIACCSNTTSQDTPFTLDNANKENRQIASMQINMEENDPGGEERTGHASKLDSNVLPSSKELCDPAIEFGAISSPFKENQNQDMGSNLDTDLNKTPQQKPRRRKHRPKVIKEGKPKRTPKPVTPKPVKSKENPTVKRKYVRKNALSKTSIPPMEVTRELTKEMSGTAKMSCKRAINFDMGTRDESSAAIENTIALLGKGNGVNVGLADDLDTSVKQASNSYTSLPEDTQALNIFPLGRKGWGTKPEEKPAPKRKYVKRKGV…	PvROS1	7	JGI Phytozome	P. vulgaris v2.1	X	X
	Phvul.001g186500.1	1689	MEIPESDRRKLQQQPPGFPIPTTPFNPIAPMPVPIWTPEMGNHLYSHFNGIPAGFHVSPYPDINNWPFHRSEPAVFPHHNAQTAPQISFEAFPSSSNGIAELFAQTDIPFAYSNVTNEELLSQFIPPYNLQCNPSYASFDHHQLSLEQPLANTIHNQYQGLLGSSYFDYCGKTFPQIAPHKDDAVAAEPRIDAATPTERNHQREDKNARAIYDLNRETAASSAPRKENYNHKMEVSLDFDLNKTPQPKARRRKHRPKVIKEDKPKRATKKVQSKENQTDKKAKRKGLNTTSTPQTEVTGKWTTPLTPESVTKTCRRSLNFDTREQARDGNSRHKETMLFAKASSSRNWMADCNGLQECAQILSNNSNSRDCLSTGCGLQAVGSKRKQPGIEQADNGNIN…	PvROS2	1	JGI Phytozome	P. vulgaris v2.1	X	X
	Phvul.003g032300.1	881	MSKVTGQSTATGDEVEFDLPSSSKKRKNREETNDQLPRKAQKKIYRPKVFSQIPNRTKKSQAKSSTPKPSTPKQRTPKQRKSHVKRGASCERQLFNEDSSTASNELGIEYNSMQSYHKVSTLSSVCLLQEKQIGPNFPLLFKKKRVVRRRLCLQHFLTPFAKRMRSKSFIRKRRHWMNFSVEGCTFKCKKLISRIKKIRSLMEKDKRTKELVLYKGLGELVPYKRSSIHVDVLLDEETLRVWNLLKEEKGHDEYDEMKKKYWENIRKIYKFKVESFMDHMHVLQGDRRFLPWKGSVLDSVVGVFLTQNVADYLSSSAYMTLASKFPLKKEEAVVCNTKSEKEMKENKENEGEKVNESDSNKVDEKGRTKGCGLGGEERDDVEVVVDEKKSNGKKNKNQE…	PvDML3	3	JGI Phytozome	P. vulgaris v2.1	X	X
C. arietinum (chickpea)	Ca_20137	2168	MEVGEIDRKEQQEEIPWIPTTPAKPVLQKSSQICTPVPEKNHQTHHHANGAVACSEFSNGSEKNNKVRDGSVPVARVADIAGDNGKICDKTVSENVSCWSYQGLAESMFQTEVALPSSSYATQLGNNNRFNDLFVPSVICDNSRVPHETSENACCSKRTSEDDPAKKLDKDGIPPNKELCDHHVMEFSAVSSPLKENHNPDEGSSLCMGPNKPPQPKPRRKRHRPKVIKEGKPKKTPKPATPKAAQPKENATGKRKYVRRKGLDKTPTPATQVTEEFTEEIPEAAKTPCRRTLSFGAGTKDQSSAGRENTTALLGKENGAVVQETNFGLACDLNTSVKHASSSSMSVPEDKHAPDTSSQSTCPGEKPKENPTGKKKYARRKALNKTSAPKEVTGELTTE…	CaROS1	4	JGI Phytozome	C. arietinum v1.0	X	X
	Ca_17547	1736	MEFGETDKEKLNSQTPWIPTTPFKPIVQRPLPIYTPGERKQLGFHFNGEIACFESSAGGGDINRSSHSWSESAAATSNIAHDNGRTRVQISFDNIPSSSNSFAELMAQAEAPPTYSNTTYGFSENQFVPDEWNSQFNQNYAFLGHQNLCQEQPFINFIHDNYQDPQGSSYLDYYSKTNSQVVLPPENSIAEKDRQVVETQMSTEERGQREEENNAPATMCNKIYDPVIDFTAISTPCKENHNYNKEIHHAIDLNELPQTRPKRKKHRPKVIKEGKPKRTKKPTTPKPDQSKENSNDKRKYARKKELNTTKKEMTGECTKPSMPEFAKKTCRRSLNYDILEQPRAGHFTCKENATTCFGGEIGKEDAQSSPNESNSSNRNLLSTEPQEVGSKRKQSGTIE…	CaROS2	6	JGI Phytozome	C. arietinum v1.0	X	X
	Ca_08414	1817	MNFGEQLLGQNGKQFQMNNTWVPITPEKLVQIRSNTVPDWTANEMRRANYQEFPVPGCDYTNEMRLHYNGPYQNLHLLRQTGQSGENNNFGGNSVHRSSVIDHIAGSYARTQHYESNGLNSNTLELLLKKNATNIATANRNLDTSINVAARNPLLPRFYPQASSDMSYSYAASDMVYKEANRLLIPNRNSEFSGSNTDNLLNNDIHCSVSNQLKDIFSGVYYGDSHPEHYLNYVPIGEADATTSFTNSLQSIPKTTDQLKFLENQICPMPDYTIAESTSHEKDIVSCTENEIQEYCDGLLQQIVDSSSAIVSPTHGDQKGSVSNISDRASDEIFDLNKTPEQKVPRRRKHRPKVIAVAKPKRNTNPASQENQVKENPRRKRKNVPKTAATPKADVVKEM…	CaDME1	4	JGI Phytozome	C. arietinum v1.0	X	X
	Ca_07031	651	MRDIQGDRRFLPWKGSVLDSVVGVFLTQNVSDSLSSSAFMSLAAKFPVKSVTCEESNMVDKELKDKKIEEMEAHKGNDSSKIDNNEAENNSSPMETKLDSPSTISGEKQSPNTKRKKNREEKEMLLEKKRQYWDTLRKIHTKNYRHSDYVDSVDWETVRTAVASEVAKAIEIRGQHNIITARIQRVLNKLLETNGSMDLEWLRYIPPKEAKEYLLSIHGLGLKSVECIRLLTLRHVAFPVDVNVGRIVVRLGWVPLQPLPESIQIHNLEEFPDSNKIQQFLWPRLCTLDHDTLYELHYQLITFGKVFCTKKNPNCNACPMKNDCKHYASSLASKKLALPEPGPTTNQGIVVTQMDHTDAYSFPYLDSLNDFKSTFITKESKGCEPIIEMPTSPEPESGE…	CaDML3-1	1	JGI Phytozome	C. arietinum v1.0	X	X
A. hypogaea (peanut)	arahy.Tifrunner.gnm1.ann1.GS0SHW.1	1771	MEIGETDRNKVQGEVPWIPNTPSKPILQRPPPIYAPREGIEIGSHSNAVSACCESSTNAEIETRQHLRLPHEAAVTNIACDSDKTSARLSFDNNSVSSNNGFAELLAQANAASATSVAAYADFLRNHFVPNLNTEINPTCALLGQGHLSYGQPLFNATHNCQDPRGSSFFTYYRHNTPYAAPHGPDNAVRTGNTQYAETQLHMEKKDQGREENKVSDAEHNNNDSPQNKELCDPLIEFGAVSTQCQENQSQNKEINPHVNLNKTPQQKPRRKKHRPKVIIEGKPRRNSKTKTPKSDQSKESSTSKRKYVRKKGSNTTSTPQIEVTGELTNPLMPESAKKTCRRSLNFDVGDQQRQRNSRCIEDTNINLGRETVAATNTLTNEGRQALGTPLSESNSCWA…	AhROS2-1	16	JGI Phytozome	A. hypogaea v1.0	X	X
	arahy.Tifrunner.gnm1.ann1.66FLD0.1	1813	MSGQQNSRYSIMNFEERLLGQDEKKFQIENAWVPLSPEKLNPIRSKMLSDYPVNQLRGNFQNFPVSGRDDMKEMLLHCNRPNQNLNLTVQTGQIGQYSSVDGNSTNRSRVLNHIAGSYTQACNYESSGLNSNTLELLVKNNATNIASANRNLNLSVNMAARNPLLPKFHHEATSDVTNSYAGVHRCNILSASGIIYKDPNRLATPNENSEFNGSNSNSLLNSSDSNQWMGIFSEIPQGDSYPKYNMNNMPLREADATGTFTSSLHSIAETMDQFKFLYQLCTVPDDTIAESTSQEKGNQEDMALSRENETQEYCDELVQQIVDTSFVVSAPHGDQNGSHNICEKGIDLGFDLNKTPEQRVPKRRKHRPKVIVESKPKRNPNPATGKRQVKEYGARKKNV…	AhDME1	19	JGI Phytozome	A. hypogaea v1.0	X	X
	arahy.Tifrunner.gnm1.ann1.N246S2.1	1767	MEVGEIDRNKVQGEVPWIPNTPSKPILQRPPPIYAPGEGIEIGSHSNAVSACCESSTNAEIDTRQHLRLPHEAAVTNIACDSDKTSARLSFDNNSVSGNNGFAELLAQANPSSATYIAAYADFLRNHFVPNLNTEINPTCALLGQGHLSYEQPLFNATHNCQDPRGSSFFTYYRHNTPYAAPHGPDNAVRTENTQYAETQLHMEKKDQGREENKVSDAEHNNNDSPQNKELCDPLIEFGAVSTQCQENQSQNKEINPHINLNKTPQQKPRRKKHRPKVIIEGKPRRNSKTKTPKSDQSKDSSTSKRKYVRKKGSNTTSTPQIEVTGELTNPLMPESAKKTCRRSLNFDVGDQQRRRNSRCIEDTNINLGRETVAATNTLTNEGRQALGTPLSESNSCWA…	AhROS2-2	6	JGI Phytozome	A. hypogaea v1.0	X	X
	arahy.Tifrunner.gnm1.ann1.K8W5NT.1	1137	MSYPTETTVEFSEALRRVPNTRSRSNKKSKEESSTSGNFYIELPIGTQDHNTSAKRMRYSRTNATNKVSYDHERSTEDIKTSSIFSPESTSQETKPIVNCSFKDNKNKRDQTTENAESPNTSGRNIIGVHHNDLSLYRTKSKTASTSAATNQNEVEMIISPQDARRLDYASSSDNSECNSDCDKFYKFISMVRSWEAVDKSLGQVVPFKKQYPRARVNLDEETNRVWKLLMLDINSHGIDGEDEDKSKWWEEERNVFRGRADSFIAKMHRVQGDRRFSRWKGSVVDSVVGVFLTQNVSDHLSSSAFMALAARFPNKSQVNVGAPVEISEGDAPLNPSVHDATEHSGHKITQWSVPEMTQRTGFNDMVASRSSGVSQTGEASNGQNDEKMGSCSGGHSEV…	AhROS1-2	2	JGI Phytozome	A. hypogaea v1.0	X	X
	arahy.Tifrunner.gnm1.ann1.AM3VD0.1	1137	MSYPTETTVEFSEALRRVPNTRSRSNKKSKEESSTSGNFYIELPIGTQDHNTSAKRMRYSRTNATNKVSYDHERSTEDIKTSSIFSPESTSQETKPIVNCSFKDNKNKRDQTTENAESPNTSGRNIIGVHHNDLSLYRTKSKTASTSAATNQNEVEMIISPQDARRLDYASSSDNSECNSDCDKFYKFISMVRSWEAVDKSLGQVVPFKKQYPRARVNLDEETNRVWKLLMLDINSHGIDGEDEDKSKWWEEERNVFRGRADSFIAKMHRVQGDRRFSRWKGSVVDSVVGVFLTQNVSDHLSSSAFMALAARFPNKSQVNVGAPVEISEGDAPLNPSVHDATEHSGHKITQWSVPEMTQRTGFNDMVASRSSGVSQTGEASNGQNDEKMGSCSGGHSEV…	AhROS1-1	12	JGI Phytozome	A. hypogaea v1.0	X	X
	arahy.Tifrunner.gnm1.ann1.CUT3DD.2	1782	MQISTWTNERKITLQTFFLNCRYSIMNFEEQLLGQDEKNFQIENAWVPLSPEKLNPIRSKMLSDYPVNQLRGNFQNFPVTERDYMKEMLLHCNRPNRNLNLTVQTGQIGQYSSFDGNSTNRSRVLNHIAGSYTQACNYESSGLNSNALELLLKNNATHIASANRNLNLSVNMAARNPLLPKFHHEATSDVTNSYAGVHRCNIHSASEIIHKDPNRLATPNVNSELNGSNSNSLLNSSDSNQWMGIFSEIPQGDTYPKYNMNNMPLREADATGTFTSSLHSIPEKMDQFNFLYQLCTVPDDTIAESTSQEKGNQEDMALSRENETQEYCDELVQQIVDTSFVVSAPHGDQNGSDNICEKGIDLGFDLNKTPEQRVPKRRKHRPKVIVESKPKRNPNPATG…	AhDME2	9	JGI Phytozome	A. hypogaea v1.0	X	X
	arahy.Tifrunner.gnm1.ann1.R549UJ.2	1040	MSKNTAQLQPKKMEAGVQFPWIPETPVKSSPNRQKISNRDDNSTSSVKLDFDILNLGDEDDASAGAANNQVPNAPSQCDDGNTSHDELKTLNPPSSKKRRGDNKKKGSNNNGQHTKLRKKIYRPRILVDESLDTKKVGKKSQPKVPKTPKKKKTPSRTPKPSTPTKKKNQPRRAPSCKLSLLPLLNDEGRASLPFLGNNVNKFDQEYFDFESSICKNALGSQYNLLETYQKLASFSSSCLMHSRQVGANFPSMCRRKRMKRIRARLEKYLTPFKKGLRSKIFIRKKKSCLEKFTIEGLTTTKKEMKSLIRRIRSLKRMKKSRKTKGKNDQLVLYEEGLGGDRMLVPYKGHDPNNKKLRVEVALDEETLRVWNLIMDGKTHEDSDDLKQQQWERERFAYK…	AhDML3-1	8	JGI Phytozome	A. hypogaea v1.0	X	X
	arahy.Tifrunner.gnm1.ann1.YBWK9U.1	1061	MSEDTNQPQPKNMEMEAGIQFPWIPETPVKPSPNRQRISNRDDDSTSADKLDFDILNIGDEDDASAAAANNQVPNAPSQCDDGYTSHDELKTLNPPASKKRRGDNKKKGSNNNGQHTKVRKKIYRPRILIDESLNTKKVGKKSQPKAPKTPKKKKTPSRTPKPSTPSRKRNQSKRAPSCKLLLLPLLNDEGRASLPFLGNNVNKFDQEYFDFESSICKNALGSQYNLLETYQKLASFSSSCLMHSRQVGANFPSICRRKRMKRIRARLEKYLTPFKKGLRSKIFIRKKKSCLEKFTIEGLTTTKKEMKSLIRRIRSLKRMKKSGKTKGKNGQLVVYKKGLGGDRMLVPYKEHDPNNKKLRVEVALDEETLRVWNLIMDGKTHEDSDDLKQQQWERERFA…	AhDML3-2	18	JGI Phytozome	A. hypogaea v1.0	X	X
T.pratense (red clover)	Tp57577_TGAC_v2_mRNA5898	2132	MEVEEMKRKEPQAEIPWIPTTPVKPVVPKSAPICTPVEGNSQIYHQANGAFACSEFPHGTEKNRESHDGSVPAATITDIAGENGKICDKTASDNVSCWSGLDSAEFVFRTEVASSSATRIGDNNGLNDLVVPSVVSENSRDPHETSDIACCSKRTSQDDPAKKLDKDGTPPDKELCDPVVEFAAVSSALMENHNPDEGSSLCTGLNKTPEKKPRRKKHRPKVIREGKPKRTPKPATPKPAPSKENTTGKRKSLNFDIGTKDESSAGRENITALLGKENGVAAQETNFGLICDLNTSVNVKHASNSSMSLPEETHETKPKENPTGKRKYIRRKLNKTSAPPAEVTGELTTEKMPELAKPPCKSCTNFDKGGMEESSAVKETATAHLSEENVVTEGTNPDL…	TpROS1	1?	JGI Phytozome	T. pratense v2	X	X
	Tp57577_TGAC_v2_mRNA2573	1886	MNEQQQQNNRISIMNFGEQLLGQDGKPFQMNNTWVPITPAKLIQVRPNTVSGWPANQMSRADYQEFHIPGRDYVNEMLLHYHGPYQDPRLMGQTFQIGEHSNFGGNLVNGNSVINHIAGSYTQAQHYESNGLNNNMLSNGLNNNMLSNGLNNNMLSNGLNNNMLSNGLNNNTLSNGLNNNTLSNGLNNNTLELLLNRNATNIATANSNLDTSINMAARNPLLPKFNPQTSSDVSYSYAASDIGYREANRLLIPNRVSEFSGCNTDSLLNNDIHCSVSNQLKGIFSNASYGDTYPEHYLNYVPTSEADATTSFTNSLQSIPKTMDQHKFVENQFAHFRELSRDLDNHAIAESSSHEKDFVPCTENEIQDYSEGLLQKIVDSSSAIISTTHGDQKGSVSNN…	TpDME1	1?	JGI Phytozome	T. pratense v2	X	X
	Tp57577_TGAC_v2_mRNA33454	1093	MISPSTPMAIPFNDSSPVSENDDTMSCCNEDLSNHADQVFDVLHQCEDVELCPPSFSKKRNNSQKDVNDELQKPVKRAKYRPKVVSQVAKRTKKSQPESNNTPKPATPKQRKTYVRRKTPKCQRPLFVDEDSISFSFLENFNNSKVEQHEIENSTITNESAIGYNSLQSYQKMTSLSCLTLIESRRVGVNFPITCKRKRVRRQKIQLVKLLTPFAKGKRSTTFIRKRKCWTHFCVDGMSKTSRKMKSLIKRIVSLKKQKRPKPNKLVARKKSGELVLYNKKSRVDVILDEETLRVSNLLLAERGHHEPNQSDEQKRYWKETRDFYQERFNMFLYRMRYIQGDRRFTPWKGSVLDSVVGVFLTQNVSDHLSSNAFMSLAVKYPLKSVSCEQSNNLFLSAP…	TpDML3-2	7?	JGI Phytozome	T. pratense v2	X	X
	Tp57577_TGAC_v2_mRNA10598	1768	MEFGETEEKELNSKVQWIPTTPFKPIAQRPVPICNSGERNQLNSHFNGEFSCNETLSGGDVNNLSETVAVASDIGGDNARTRVQISFDDNVPSSSNSFAELLAQAEAAPSSSYSNASYGFPGNQFVPGVWNSQFNQNYAFLYQQQPFLNLIHNGYQDPQGTPYLGYYDKTNSQVALPPENNTTSKDKQVVETQICMDQREDENNASATMCNNSQNKLYDPVIDLNAVSTPCKENNNHNKEIHHAIDLNEIPQTKPKRRKHRPKVIKEGKPKKTPKPPTPKPDQSKENSTQKRKYVRKKESNATPAEVTGECTEPLMSESAKKTCRRSLIFDIPEQPRDENSACREENATTCFGGEIGIEVQETHALQEDAQASSSNGKLSNTGSQEVRSKRKLSGTAEQ…	TpROS2	1?	JGI Phytozome	T. pratense v2	X	X
	Tp57577_TGAC_v2_mRNA35787	899	MLSPSTTQMAIQENNDDDTISLCDDDLFNDPDFQGEDVELCPPSSSKKRKNSQKDVNDELQKPVKRRKYRPKVVSQVPKRTKKSQPKSNNTPRPATPKQLKTYVRRKTPKPKVVSQVPKRTKQSQAESNNTPRPATPKQLKTYVRRKTPKCQRPLFVDGDNNSLPFLENFNHSKVEQDEIETSLSCLTLVKRKKVRSQIIQLVKLLTPSAKGKRSTNFIRKRRCWTDLCDGMSRTSRKMESLIKRIVSLKKQKHLKPNKLVARKKSGELVLFINFVGDRRFTPWKGSVLDSMVGVFLTQNVSDHLSSNAFMALAVKFPLKSVSCEQSNNLFLSAPKVDSETENNSCPMEKNLNSSEVSRERTNEEIEDQEANESSKVDGMERNSDSPGLNFGMKQTPNT…	TpDML3-1	7?	JGI Phytozome	T. pratense v2	X	X
S. lycopersicum (tomato)	Solyc10T002647.2	1807	METGQGSSWIPATPGKPSFAESPPICSTGQENQQAQVDLSDLQRKQAVEHANGSTAEAQNAVEHANGSTAEAQNAAANRGSTSSVEDQCFTTSEAVVGTKSEMCGGGINMYNNFPSDNVELWSSMSFGDLLAMAHAGGSGTTPADETAYSVKSSFQPLINTQNADESSILSSFPFNLNSPPKMTGATLSSNIQFQFEPVTPDMMKIKGQASNASNLDINVTTAARVIQSNEDIIKGAEANELQQNKEQSVLILEGKLDTELNNTPEQKTRRRKHRPKVVVEDKPKRTPKPKIQKQPGAEETKTEKRKYVRRNKVGEPTATFADEVSNTICHEGKPPSSEKTPTAKRKYVRRNQVNKSTEKPSEEGSSVTIGTPAATSTEEVKNTTFHVGKAPSSEETPT…	SlROS1	10	JGI Phytozome	ITAG5.0	X	X
	Solyc11T000248.1	1897	MNPGRVFSTPQENGGVQNGDPRIPFSQQKPVLPLPDLVPAEMQRNQIEMTGWPDLLGMYGDFLLMPASETGVVQNSVTSVGWDKGSTGHWSDVVVRNRSSEIDTYSCGNIPDQSKPACTRVNSLEELIGMKNQSNRISTHGRSSNSTRSDIPILRNSYAQVDRRHEQTQLKAAGQTVLNQSQLFKSPNQMVDCYNRHLPLDGMRSPYQVNRSLISPVAQDAGTSPSTNSFFTFAPVTPDHNHFNDNQHFERQNVPIQERSSLEKDGQENVLGSMKSKDNHSDKLLQRVTDSVVVNSPLTEKVDNGNVGNVDIDLNKTPASKTPKRRKHRPKVVIEGETKRTPKRAAPVDGTPNENPSGKRKYVRRDGLKASTTEQTEVNESAAQRNSTPNENPSGKRKY…	SlDME1	11	JGI Phytozome	ITAG5.0	X	X
	Solyc09T000303.1	1894	MAGREGSLIPQADDFQIGTSWFPMTPAKPSLPPIYGNRQQNQPGQIDGLESQRISQGQDLSQVNQIELRDFLQEPQAQRAATCCGSTNSATVTEYFDAWEAAAGAESKMYGENNIKTCNDVSTDDIDEWSNVSFGHLLALAHAAGSTAVTENANEEINLALNGSFNSLISSQDADGSSTCSRFPFNLNSPTRMTDEDSSSNNAFPFEPITPYQIKKKGPASDAPGLDINATPIPRHVQSSKDTLKRAEANDLQQNTEKSGLVLNISELSDNMIDKVVDQDAEQNNTPQQKRRKKHRPKVVIEGEHKRTPKPKIPQQHSSMGTKKEKGKYVQRNKIEDPPGTPSDEVNDMTKHEGHLPSSAKIQRARRTYIRRNQVKKFAPKPAEEGSIDPPNVSRPRRY…	SlROS2	9	JGI Phytozome	ITAG5.0	X	X
	Solyc03T003535.1	1529	MSIISTLNCFNPTYFTAPFSHQPPFFAVEKSGMELGNADQEELEKTGFFTPITPFKCISAATEFNSINAGLNNFWSTNNNSQKKDEEVSDVIGGRSEFLSRHLDGGSESATVAPSTPMTKANPRKKQCGSVDMNERPLKKPRMRKHTPKIFDESKPKKTPKPKIKPSIPKSGNSKVSAKIKKKIEKDHDKVSVDLSGDAYMQTPNSKIPETIPGSLVLQVSTPQPETLEHALSAISPPDFEHDNLTDFGHVSKSCKRSLPFNLENENDFLSIEAAEVIRYHVTQSYNKFLTNPLDGFNEQAVDTNSSIGLEDNLEAESQPNQGNDPSIYQDDQRACQHHFLKVYERRKTQIDLMPLAGNEAHVYPNNHGTISACRDHSVKVYKRRTIGNTGAVPLAGNE…	SlDML3-1	3	JGI Phytozome	ITAG5.0	X	X
V. vinifera (common grape)	VIT_208s0007g03920.2	1942	MNISSSRSSISEEKDFPVQGSWIPVTPVKPILPITQPQICAGREHSQLYLESSSGSERFPPTFPQETQAHKVVACENFRNCAELNSFSSWNPVPGAEMGVRNYNAGIYRKPSFNLEMSLDNIPFTQLLAQTNAAFIPSAVSPENVSGASSPFMSATHLHPEVSSSTSMLLKSQDLLLGSSQWTSAPDMNQYGLPTYRHFYDLNSPPESMAEAVSGSAISHFAPITPDKNRRVENSWVAKSQNLCPEEKTVQETEKQEKAIDTTRVEVNHLHCDSKLLQSPTDLSFAPVSSPLNENVNLDNGGNHAIGPLTENCNFDKRGDHIIDLNKTPQQKPRRKKHRPKVVIEGKPKRTPKPVNPKCTGSQGNPTGKRKYVRKNGVNKPSTNSPAEIMGRSTEPERP…	VvROS1	8	JGI Phytozome	V. vinifera v2.1	X	X
	VIT_213s0074g00450.4	2227	MNFGKGISISQENDMLIGGNWLPAGTDKQFLVRSQPVPVDKQVNQAGRTNWQALLGFPGGHETQNCNGVVQNLNLVDLGGLSQTLYNWDGNFAEKNRLINHIAGSYNQNFVNGDTSTYKHIFTDGGSRVSQSQPFANSDGTGTYSQALANVGPGIYSQALANGCTVPYSQALANGSTIPYSQALANGGTVPYSQALANGGTIPYSQALANGGTNNYGQAGTNNYSQALALANGGTNNYSQTLALANGGTSTYSQALANGGTIYYQGLGNGSTIYDQGLANSGTSSYSQAFVNGSPGAYSRLIGNGSAGSGNLAIGNGDAALYSQAMHNGDIDLNEYSLQDLLGLASSASVDRSSVQAANRPPALKPSVSEALSRSIHTANRPLVLKTSASEAQNRNFHV…	VvDME1	13	JGI Phytozome	V. vinifera v2.1	X	X
	VIT_206s0061g01270.1	932	MNMVDNEMRDLKSRVDQEGEGCSDCNSMRVYRRIFRRDQCLSNSKKMGPVFPKIYKKKRSQRRRREAMMWFVTTARACQTASPLSVIRRKKRSNMFTPRRNLASLIAIPICDELPWNSLKKGIPSVKPKRPKKTVPKRVTDIGEGICDQNCMAKHSPTSTTPPRQSSWEAEEVRVDSLIQKLELLSISDKINQLVPYQKSAPKGNQLVRYQAKKPAPKVDLDPETLKMWNLIVLKNRSEGVEEEMDKKDEKRWEEEREVFRGRVKSFLACMHLLQGDRRFHPWKGSVLDSVVGVFLTQNVSDKLSSSAFMALAALFPLPSTGNDGACYLVDEDEEDEEEDCQTRDQIQFVSATESNPHCMESFTSYSEQRNEMGETENKNLNNSNEGKRGKTNDKEDHS…	VvDML3	6	JGI Phytozome	V. vinifera v2.1	X	X
O. sativa (rice)	LOC_Os01g11900.1	1952	MQDFGQWLPQSQTTADLYFSSIPIPSQFDTSIETQTRTSAVVSSEKESANSFVPHNGTGLVERISNDAGLTEVVGSSAGPTECIDLNKTPARKPKKKKHRPKVLKDDKPSKTPKSATPIPSTEKVEKPSGKRKYVRKKTSPGQPPAEQAASSHCRSELKSVKRSLDFGGEVLQESTQSGSQVPVAEICTGPKRQSIPSTIQRDSQSQLACHVVSSTSSIHTSASQMVNAHLFPPDNMPNGVLLDLNNSTSQLQNEHAKFVDSPARLFGSRIRQTSGKNSLLEIYAGMSDRNVPDLNSSISQTHSMSTDFAQYLLSSSQASVRETQMANQMLNGHRMPENPITPSHCIERAALKEHLNHVPHAKAAVMNGQMPHSYRLAQNPILPPNHIEGYQVMENLSE…	OsDML4-1	1	JGI Phytozome	O. sativa v7.0 (Jap)	X	X
	LOC_Os05g37410.1	1829	MAKDENPSYLHLIFLSSRIRVFILDPPHSLSLSNGQCELQVVEEAAMDPSGLNLQGNPAENQESWTSGVSVGRGTPNLGVGTAVAGRSCPPLTLFPGSSLSSTALLNAMHEGSFPQAALVAGSGSSADEQHGGPPVRPSYNLPAGCTQVPISILVFHRRLTGRGSRRRSFMPAPALSGVSEDGASGPIPQSDFLSLGGPSEVFAEHAPMLLQPNGLYTEASNTESEREASQLQQSAEAVICDSHSKLESVMEKIQGQNPQESIGLVAEGSTDDNIHKYHQKAKRARTQITHSDKMDLPTQAVSACKEKTLTQIEMQIADAERTEAFKSEDAPAQKLKTRRRKHRPKVIREDRPAKKQMSTTSKEKPLNQKPKRKYVWKNRNPSSLEKCAEPFSDHSISR…	OsDML5-1	5	JGI Phytozome	O. sativa v7.0 (Jap)	X	X
	LOC_Os05g37350.1	1847	MAKDENPSYLHLIFLSSRIRVFILDPPLSLPLSHGQCELQVVEEAAMDPSGLNLQGNPAENQESWTSGVSVGRGTPNLGVGTAVAGRSCPSSTLFPGSSLSSTALLNTMHEGSFPQTALVAGSVSSADEQHGAPPVRPSYNLPAGCTQVPISILVFHRRLTGRGSRCRSPQSRSFMPAPALSGVSEDGAYGPIPQSDFLSLRGPSEVFPGDMAMNHSEPATSYGYNSEYAPMHLQPNGLYTEASNTESEREASQLQQSAEAVICDSLSKLESAMEKIQGQNPQESSGLVAEGSADDNIHKYHQKAKRARTQITHSDKIDLPTQAVSACKEKTITQIEMQIADAERTEALKGEDAPAQKLKTRRRKHRPKVIREDRPAKKQMATTSEEKPLNQKPKRKYV…	OsDML5-2	5	JGI Phytozome	O. sativa v7.0 (Jap)	X	X
	LOC_Os02g29380.1	1207	MGAEAEESLDHPGSLSGMSPATPDVAWKPAERRRRRSEADAEGSSCCSLSAATAAWVGAGNVESDDPSVRSVAAGEQSRSVSRPEEEEEECASCTQDSTVSPPVSECGDRTAQQEPSTQEYTVSPPPVSECGDKVVQQESSNQESTVSPPPVSECGDKIAQQGSSTRESTVLLPVSECCNKVAQQESSTQESTVSLPVIECGDKVAQQESSTQESTVSLPSSECGDKVAQQESSTQESTVSLPLSECGDKVAQQESSTQESTVSPPVSECGDKIARQEGAASAIPTPEKVEATPRRPRKRSTKGLTRFKIMKDHKAAQRTATPVEVKIKRKAKDNGRRPLGDKSVRRKLNFEGDAVDFEGNREFSRAKLMEDLRCLAKVHGLRDDLGAGKRSKKGKKRK…	OsDML3-1	2	JGI Phytozome	O. sativa v7.0 (Jap)	X	X
	LOC_Os02g29230.1	1636	MEGQWLHEPHGINLCFSTSSTLPRMNPSIETGTRNVTHVPSKNVSTSSSQARKTTVQKPKRKRHRPKVIKEGKATQAHKSTTSEPPKEKDKPAGKRKYVRRKEQNTTPTEHHPPSKDAVAHTIVVPTLAKRCFNFDGRDHHEENVDLLSQTRVEETPTCYGDAQLLTSAVDGSNIQLVQPWCGIGSPIFASVDPMANMRQIWAESSRANRVTFDLNNSAVNHIPRRFSNPTNSYGQNFQFGSREQINQYQHFYDDDIPDEIPENLVVPAWHTGRTWMVGNFNHEASTRVVNPMPQGYRVPQSPSEPPTCSERNTTNINLSEFPAKNDQSKFATNPNDQIGASFGLCDSHFSDVHAIGKKRGYDTITDHQVSFDAYLEQSNSRRQFYSDPLSTSSETYLL…	OsDML4-2	2	JGI Phytozome	O. sativa v7.0 (Jap)	X	X
	LOC_Os04g28860.1	960	MRRAAQRAIAAAEKAARRKTQRAVAAAARAARRKKKAAESVARREQKAAMREQKAAAAAGQKKRKAAAAAAAAVRATARRKLDFDGEQQQIMPPERIYRQTSSSSRADLMDNMRLLLVAFDLSPPEQPCTPPARSERQILRLPPPATVTTAIVALKNKPKKATTVNKLALVPYKPTRAAASAVDEVLPGALVLYGDGEPTTQAARMFVPRWTSVRLVFDKLPPRFGLVVGLDAATRAVYNELVRREATSYGDDELHDVPGGPEWNERRREFERKVDHFMYNMRSIIGDRNFSPWGGSVVTSVVGTFLTQNVSDNLSSNAFMTIAARFPLKNRRNAGHHSDNVPLLAQNSGNVPLLLADGHDEQEQCHCQLQSIAQCSSGSKSGVAEPGDVSQRAEQTEC…	OsDML3-2	4	JGI Phytozome	O. sativa v7.0 (Jap)	X	X
M. domestica (apple)	MD14G1015300.1	1808	MGEEGGDRSSCCWMPPTPYRPIVPRPEPKLQPEIATASRPLAFGVEETQENRVVIDLDPDPEEESGFVYHGAGAGAGAGVESSTDAYFCRVAQWRDVPCKELMILAVASANDGSGGAVLGDTQHEYSFPDNHPYDLNVPPPTTYGQFAPITPDKSMRVDSVQMSQIPSSNADDGRGQEIEEQWDANSATINIIDLENNKDIEKSAVDSSQATFSTQLQEHCNPDKEVNIIIDLNNTPQPKQRRRKHRPKVIIEGKPKRNPQPSGSMENPKPKRKYVRKSTLEKNKTPPPQESTEHIDSNNLKPPKRSCRRTLNYADTEETIDGISSSKSFNVGSQSQEMNVGTDGVQSNSTGPCRNEVELVADNTQAGIAQDLVRSTSRMLKHYLSLPDQQPPVTPQQI…	MdROS1	14	JGI Phytozome	M. domestica v1.1	X	X
	MD12G1017600.1	1802	MGEQGGDQSSCCWMPPTPYRPILTRPETKLRPEISTSSRPLGVEEIQENRLVIDLDPDPAEESGFVYHGAGVGAGSGVETSTDAYFRRVAQWRDVPCKELMILAVASANDGSGSAVLGDTQHEFSFPDNHPYDLNIPPPTTNGQFAPITPDKSMRVDSEQMYRIPSSNADDGQGQEIEEQWDANSATINIIDLENNKDIEKSAVDSSQATFSTQLQEHCNPDKEVNISIDLNKTPQPKQRRRKHRPKVIIEGKPKRNTQPSVSMENPKPKRKYVRKSTLNKSTTPPPQESTEHIDSNNLQPTKRSCRKALNFDAEEPRDGSSSSKSLHVGSQSQEMNVGTNGVQTNSTAPHRNEVELVADNTQAGIAQDLIRSTSRMLKHYLSLPDQQPPSTPQQTRGS…	MdROS2	12	JGI Phytozome	M. domestica v1.1	X	X
	MD09G1259100.1	1042	MRTHYKGDGAVVPYERFIKKRKPRPKVELDPETNRIWNLLMGMEGSGGIEGNDMEKEKYWEEERKVFQGRVESFIARMHLVQGDRRFSKWKGSVVDSVIGVFLTQNVSDHLSSSAFMSLAARFPLKSSNHQAQPKVRTNILVKEPAVHMTSPDDATKWHEDRSSQPIYHPISMTLHESEANQKDSETSGTERNLVDAHSQCLEEEFVSSQDSFESSVTQGALGIKSCSGSNSETEDPGTGCQPKVHVSISTCQQVAKGTKFQDFYNQVNGSSVSYDGSKNGHFKYAQLKRKSDRIDHLNGTSFKDPINLDDEKMQVPVALSSNNQFHMNPDSGKPESWKFGNFSEESISSWPTSASRFNIEQEENCKSLRTEELSGSVVNSSMQQNTLWSSQGTPTKDP…	MdDME1	9	JGI Phytozome	M. domestica v1.1	X	X
	MD11G1157400.1	1441	MAELKVYQRREPDSRDNAMEEEEKEEVVQNRKEGLWVPQTPAKPATARTQKSYFRRRFKSNSGQNNSIVMSDSRVELERSDGVSVFSAAATSSEEKTCLIDPIEECPREEEKVQNLGGIGSTNLSCVGLFDLNKIVLECDEGCVSFSYGGSEKGCLEGLVAAEEVAANDDEILTVGEELVLQGIIVEPPISQSSTNATKGALFENINCCFIPVAQTGINEEKLQQGSAIPDCMSQCKSGDQQNQESVKQEDVIHRAENKNRTSNAANFMGGSKFPSTSSPSQKKKNLKRSPDGGIDLNEGPHKKPKKKVYRPKVVCIGRPRPIEPKTPKKATPKRPASKPKTPKPTAKMHVSSEQNMSAEKSSSSPKHSVPIEVTLDKVAFSVSDRATLDGDLKSKSNT…	MdDML3-1	11	JGI Phytozome	M. domestica v1.1	X	X
P. persica (peach)	Prupe.7G118000.1	1754	MDMGGQGEDALQDQGSSCNWMPTTPYRPILPKPQPEILMASETLRFGVEETEENRVLINFGTLDREKESRFVYHGAGTGACTSAESHFDHMAPWKGIPCQELLALANVAAGNPLLQEDGNGDGCAVLGEIQHEFSFADQRPPCDLNFPPATTYGQFAPITPDKSTRVDREPMSQTPNPNADDGRGQEIEEQWDANSATINIHELDNNKDLAKASPDSLHATLSIELQETDNSDKGVNNIIDLNKTPQLKQRRRKHRPKVIREGKPKRTPKPPGSKENPRVKRKYVRKNALNENKTPPLSTEFRERTDSNKLKSTKRSCRRALNFEIEEPGDGSSSCRSLNMDLQSHELNSCSNGVELVADNTQVGIAHDLVSSTNQILKDYLSLPEQPPSTAPSTRNSS…	PpROS1	7	JGI Phytozome	Prunus persica v2.1	X	X
	Prupe.7G005000.1	1993	MKFGGGFLLPQDEDLRFMDSWVPATPEKPIPLKRHPIPIPVNPLGNHLQGANWQQTGISREHVQMGASYNDMTQTVSPNGQLQRNGGYNGYDGSLAEKNQMINHVACSYSTGSFTQLLRPDNASWNNNPITQLLHDKAAFVASANRNLSRSVDIAVNTPLIPKLHPQLGNQGNNSGCSLLTNQNCSNGSYSSSSVMSRSLVMDFPSQVDASQRDSNSVHWLFSNQNHCSSPNPLSNGDSSSLICQDGFPVQFLPSHDLNSSPRTEADAASCIASQHPFTTDQANNVENNELFAILKSLTDESASVEKDKEVKLVMSIGDEAIQKHGDELLQNIVESSSAAISTPYKKNKDSDWEGDRGIDLNKTPQQKPPKRRKHRPKVIREGKPKRTPKPAIPKNTES…	PpDME1	7	JGI Phytozome	Prunus persica v2.1	X	X
	Prupe.2G089400.1	1803	MINLSPQNDSGNLHKSLWTFIHKINVHPLYSSILLGIFFALPFDTVILAKLEKLLIYKPTPIVTLQMRSWTTSSYNKVSMPIISMVLNCLKDEDGFPVPFLPSYDLINSLPRTEADAATSAASQLQFTTNQAKTLEIDELSTILKSFTSESASKEKGKQVKLVLSIGDEAVQKHSDGLLENIVESSSAAISTPYMETKDYGKEGDIGIDIETIDSGGEGDRGIDLNKTPQQKTPKRKKHRAKVVREGKPKRTPQHATPNINTVSNERRPAKRKYVRKNVQKESPGQLSHVPRGTIDPNAGKVAKSCTRVLRFGSQKSMDENPCRAVGQQEEMKQGNKRTFDLNIDCKGMHMGTGTDQVFRTNAAERIGAQNELMVENQIPGTMRNPTPSMTHILNNYPV…	PpDME2	2	JGI Phytozome	Prunus persica v2.1	X	X
	Prupe.6G119100.1	1614	MDELKVYQRREEHASRGNVMEEKQVQKQNFLFPPTPVKPITRRSQKTNARRRLKKNLSHNSLLITDSQLDLEDSNGVSLFSAAPSFSEEDKGLSNPIAALPTKEKVHNCSGITDTNLGYVDFFDLNKIVLESDDTNYAYMDSEKTSKGFLEAELAVEHVAKNDNEVLTMCEEQLLQGSSVTSPTPQSSPSATNRSSFDMMSTCFSQVVQSHIDAEKPKEPIGDMLPRVELWLGPAAIPDSMSQCKSDDQQNQKNVKRENHTKNDDCKFNAANCIGGSALPSTSSLSGKKNNLKRRPEGGKDLNKRPQKRRKKRGYRPRVVGVGKPRRTLEPKTPQKATPKPKTPKPNRMPASSKKNMSVKKSSSNLKNLVPIEVFVDKVDLSVSDRATLNIDLQHQSND…	PpDML3-1	6	JGI Phytozome	Prunus persica v2.1	X	X
P. trichocarpa (black cottonwood)	Potri.006G116000.4	1811	MDVGRQNQKESWIPQSHFRHILPRVIYTDRQGNQLDQASSSEIKGLSGLGECCPPSSSNWEAAARGAEKGSAGNDYVETSRERSTGNTATWNPMSLDDPLLALADAASREHLNPWIIGNYTQEPKWGEANAFPAETTSQFAPVTPDKGMKVESKKIIEMQNLCTHSRNQEFSDDGIVSRGADASGLQTDEELLQRATNSSFAVGSPVLKENHNPDRRDSDVIDLNRTPQQKPRRKKHRPKVINEGKRKGPQKSTTPKSAASTEKPTGKRKYVRKKALGKAPASSPAEANGQSADPKIIEQAKKSCRRALNFDIERQPRDKSSKCSPPFDLDSKPEAQTSAAINQSKSTVFLGRGIEVMVETTQAGIAYDLTHSINQMLKNYVSLRDKEAPSTLFPAQTS…	PtROS1	6	JGI Phytozome	P. trichocarpa v4.1	X	X
	Potri.008G025900.2	1912	MERFPIPQDIDFLPTMTGKPIPRSNVMLTDGQGNQLGRTNWQLGGFSSGCEQDVSSYSRVTQHADQIDQLVRNGGDNIRNAGIGHEVTRMGNNTGNHIESQTAGLNSSLLASILAYPNIATFTSPVAPPSASTCMVWRPSFPNLHAQVNNCSEPNLLLGNQARCWNLLSSSYISPQTHYEPPSPWLPHHDLNSSPRIEADAASSVTTSFKFATVVPDQAKRLESKLPTTMSPSREKNSSGENEKNDLVVFNELKANQQNSEELSCNIADSSSAVISTPFEGEKDLARPDEQGIDLNKTPLQKPPKRRKHRPKVIVEGKPKRTPKAATTKNTDPKEKSTEKRKYVRKALKEPAIQQTDSAIETTPPSSAKRKYVRKKGLNESAVQHTDSIGETINTRPVK…	PtDME1	8	JGI Phytozome	P. trichocarpa v4.1	X	X
	Potri.010G234400.4	1867	MGSRINYGERLILSSFLPATPEKPIPTRSNLMPADGQGNLQGRTNWQLAGFADGCVQDVSNYSRAAQHTDQIDQLFRNGGDNIRNAGFEEVKRMSNTTRNYIESQTGGLGSGLLANILDHSNISTITSSMAPPGISTSMVWRPSFPNLHPQVNNYREPNLLLGNQTHCSGLRHLGSNYISSQEPNYEPMMPCPHNYDLNFPPRMEADAASYFTTSFKLATVVPDQCKRLESRLSATASPSQEKNSSGEKEKTDLVIFKECEANQHNSKELSCNITDAPSAVISTPFEEAKDLATANAQGIDLNRTPQQKPQKRRKHRPKVIVEGKPKRTPKAATTKITDPKEKPIEKRKYVRKALKEPATKPTESTVDTAPPSSAKRKYVRKKALDESAVQHTDSIGET…	PtDME2	10	JGI Phytozome	P. trichocarpa v4.1	X	X
	Potri.001G150001.7	1497	MEKREPAIQNVGAPVTPEKPPPLSARPRPVYVKRFSERGSQSFLGRIAAEEARDPICAIITAAASTSKNEHPNNCKYLETGAVFQIDLKESIYDWNGNSTASVHGTQIFGDSGGLSEEGFQSENHNLLSIPDLEESDRYREKCCVLPYGKEQDTEHGTISRMNYEMLDHIGCSNPVEQVAISTPLPKKSGSKRPRNGMDQNKRPVKKPKRKKHRTKVAVEGKPKRTPKKMSKLATPKCMQETKEKRKCVEKAPPPLRNSQESSVREHHKEVAEIPKMENLPVDDNKMAMVSNVNHDLKDDNKDSTMQPGMDNDSGSMVLLSDDKLGFKSNENELRWNVREMRSAGKFWPKPGCQYNSLQAYRRVFRVDSCVGNSREVGPNVPKRCMKKMIKRGRKLNLF…	PtDML3-1	1	JGI Phytozome	P. trichocarpa v4.1	X	X
S. bicolor (Sorghum)	Sobic.004G149800.2	1914	MQEGLGQRMHVPHGINLCFATSSVPFQVESSIELGTGEVNPPVTSEKLPANSQAVNDAGALEGTDMNGKSVQKPKRKKHRPKVIKEGQSAKLQKPKTPKPPKENGNQPTAKRKYVRRKGLSAPAEQIPSGGADTQTTAKPGVAQRCLDFDVEDQHGHLDLVSQTRETEIQTGPGDTQPSISGVERSNVQVSCHWGGTSSSISSVDPIVDIQGLRADCMPKSVNFDLNNSRVSQMPTNYSSLMDSSGQFFQYGLREKVQTNQLLDSNSSLPVRHVSHLTSSVDHMRHPSANFDQYISKSQDCTEKSPRHYQMLSSYRISENMTAASQYTERVSMGGNFNPEACIGEGAIIKQMAQYYRLPESPFVPPKHNERDVMNGNLNEFSVKNDYLKFSTNSNYQTG…	SbDML4-2	4	JGI Phytozome	S. bicolor v5.1	X	X
	Sobic.008G085300.1	1878	MHVPHGINLCFATSSVPFQVESSIELGTREVNPPVTSEKLSANSQAVNNAGAVEGTDTNGKLVQKPKRKKHRPKVIKEGQSAKLQKPKTPKPPKENGNQPSGKRNYVRRKGLSTPAEQIPSGGADTHTRAKPGVAQRCLDFDVKDQHGHLDLVLQTQETEIHTCPGDTQPSLSGVERSNVNVSCQWGGTRSSISSVDPIVDIQELQAECIPKIVNFDLNNSIASQMPTNYSSLMDSSGQFGLREKIQTNELLDSNSSLPVRCVSHLTSSVDHMRHPSANSDQYISTSQDCTEKSPKHYQMLNSYRIPENMTAASQYTERVSVGGNFNPEACIAEGAIIKQMAQCYRLPEIPFVPPKNNERDMMNGNLNEFSVENDYLKFSTNSNYQTGADFCFHDFPGY…	SbDML4-1	8	JGI Phytozome	S. bicolor v5.1	X	X
	Sobic.009G155900.1	1789	MSAGRGDPNTPGNRPMFLSAGVPNLGCHNLAAPAAACNTGSIASQVLFSPCSTSVLNTIQEVSAPQSDQLSLISRATEQDDVRCIQPSWNMPGGCTQVPINIVVFHRQLTGRGSRAQLPPSATTALPDVSEGASIRLAGSNFLSLGRTSNVVAGDMTTNSSQLATPDKYNSEHLRLNCIYDEASKTENGTETSQLPQLAAAIFRNSCNDLESVIPAATWETRVQHSQESTTLLAESTTDDNIHMYQSMQKRLKTQINQSEHTPLSTPTVPKEKTLTQIEMQIASAEKTEMFRNEETPALKMKARRKKHRPKVIRENKLAKVQKPDSTPDGTSPNQKVKRSYVRKKRNPSSLEKCSDPVSDQSISRATGVADRSRTASVRRSLQFEPKEQGLQGGHSSMT…	SbDML5-1	9	JGI Phytozome	S. bicolor v5.1	X	X
	Sobic.006G224100.1	1040	MAPAAAEAEAESAADLGRQVGISPVTPEIVRKPTRASGTTAADDSCCTALYTSAVAGPRKVDSDCLASVPSHAQEHSQSAMPEDLGQVNCDLVGTQESSTLPPLMGESSGNLAQQEQQQHQEGVSSGSDADAASPAHTSTPEKVEPTSRRWGKKSTKGVQRLKVAKDKVMKPKVTTPSTVKKNKKMPEDGNQRVRAARSNSARRKLDLDSSESKTCFSRAELMGNLKSLAKIHGLNSEPTTRKRSKRGKKRKLMVGDKESGQLALLPYQRTVAASFALAPLWHSTELDIPRPQNHGKLQAKVLDLTDETLRVFAVLTEWDRSDSESFEGFDIGNGPEWDTERRTFENYVDIFIDEMFALIGPRKYSRWGGSLIDSVVGTFLTQNSADNLSSQAFMNLAA…	SbDML3-1	6	JGI Phytozome	S. bicolor v5.1	X	X
C. violacea (spider plant)	Clevi.0055s0131.1	1758	MEKEGVEGSSIEATWIPQTPMRPVMPEPAPIYTDRQEEKAEEENRVEKERCGFPVGNMPHLDHLPFGDLLALANAASVAFVGATPWAYHGESQLGMMSNGLNTAVVGGGRVEEPPYGQHASQQAGNTFSAGGCFEFFPVAPQRLRGNPELKQGAKAAPGARESQCITENWEPVSELSLAAASVPGESSNNTENGLSQGIEQIKSPPKPRRRKHRPKVVKEAKPKRDPKPKTPRVKTPKPADGQEKQTPKRKYVRKKGVNKDSASQPLEAVVESADAETSNPAKKSCRRALDFKNEMPEHEIQSNLSTDKQRESCRDMENQPKSGFEAAGENQMKTDTKLADERETVAEKRQVDICDSTRSENQESRVCISSPGEQAPNTPLPTKSKPRQRKRNPPKGKE…	CvROS1		JGI Phytozome	Cleome violacea v2.1	X	X
	Clevi.0011s1017.1	2074	MNSRADAGDGGFQVPPEKQVPQEFQFMGTWFPATPTKPVQVNSSLIRDERDVNQVERVRCLEPNGFPSSAGKYTDWALYNNGAVQDLNHTEQWMNGNGDYYHGADSGMARRSRLINCIAGSYAQTRNNSEMENLLAGVNVASPLAPVIRNPVGNVHTANGNSTQASGVINSSFTQIDNSQAGLREFELDDLLFSDQIPCSFSSLLSGGDNLCQGLQYGFPASNRPLYNLNSPPRREANGSFSAPTLQLVASTPNQASETENGYTLGSNFFTDDNSIPENGLLEKRVANTEQGITQQNKNVQNVEDFSVVDSTATNEQRVGGRHNDPVIDLNKTPQLKPPRRKKYMPKVVKENKPQKKTRKPATPGNVKSKETGNGRRKQAQKKSLKESAIKEQDTVRET…	CvDME1		JGI Phytozome	Cleome violacea v2.1	X	X
	Clevi.0011s0895.1	1737	MEEERGKGIRVDMIPETLIMPHLPQPGSICQSMQEQENHQLQQSSRGICVGNLPGLGTIPFTHLLALANAASTSSLGVASPGYGMDSASSTNSLVDSCRTESSSGIWDRGSSLEPHIGSAEEKLIEKSQYEVSTSQQHFYDLNLLPEEMISTIPQTTEAEFAPITPEKPGRKLPERQDPCFVSTTDQKSQESAKDSLLHAGSAATEKNHNKRKRERKVSCFEVAGKAGQERQELVKDSFLDAGSAATEKSHKKANSERDNVQQIKTPQQKPKRKKHRPKVVIEGKPNRSSKSEILKAAEPKRKKSKNRGCVKENEELTSMQMEAATETSDFKSYNRPKRSTRRALNFDYDILQEDGSFEFTSSSDSELQAQKNDYSPGGGEGPTTLSLMFSNIPKRRRR…	CvDML2		JGI Phytozome	Cleome violacea v2.1	X	X
	Clevi.0082s0067.1	1778	MDNSKPERGFFVYKRRKKMSELDKAGEHADREAVLVVGTPVKLRTTKVYGRKKSIKFQNSPLISPAFEASSIEEVSNDLSVKEPIEEKGHSSNETETGCSTIADVKENILMPLDTISSSFEHHSKDHEKDKNACINGNADDMVCFTCEKSNEVIDDDSDSRSPDSLGSSAASNTVFEPQDINGPVSEHPIDSKKDTKAYASEKSLDKGLDEDVTSVINKESVEVVNPATQGSKVDHFEMSSSSLVDNDKEELEENGFLPGDRGFLLLKRTAESEKDQSAKGPESSETESNDHPRQKEDSQGVGGKEDMEGSRKAPRKKAKKKSHRPRIMVDDKKARKTAKACMTKPADLREKTVPKKRKNNEAEVTVEPDIPGKQNSSKRRKNEKNKHETVIDLVTPIS…	CvDML3-1		JGI Phytozome	Cleome violacea v2.1	X	X
B. rapa (turnip mustard)	Brara.E00835.1	1400	MDKQQAREETTWVPQTPIKPITPIYPDQIQTEERRFAGNKDKSGLDHLSFGDLLALANNASSVFLSRQNGIDKEHVIKTPEKPKRKKHRPKVVREAKPKRDIKPKTPKKPAAAVEGEESKTPKRKYVRKKKEAGEDQEEYTPVEESSGAAAEDGEASDHDGKKPCRRALEFDDQSLKPQNGEAQHRDETKQDQDLQESHMAAVPSTPKRKRSSQSRRMGKEMKNNEAQATKRRQGKEPTRSNIYFSGQQYEQVFADNEAQWLFSTEWLQKGMRSRSTTGQQLVTQENVSAFESSCRVLTFQGRQSFESNAHLDKIETPTKKRTTGHARFRGMSSTNKASEQSQAGWYSRQTQVASSRKKRTTKSQTKQLTLLPNHCQFPPSFAAGLAPEAIWQQRHSIE…	BrROS1	5	JGI Phytozome	Brassica rapa FPsc v1.3	X	X
	Brara.J02727.1	1926	MNSRGDLGDGYVPVPAENQFMGSWTPITPRKPMQGGSSGVVVDGGGQDRNYYTGEREDPLGRSNVASNSQGGCSNVFELDDLLDTDQMPMSFTSLLSGGDHLFQAPQCGTPVSSRPLYNLNSPPTSEAVEYICGGSVQPVPSTPSLSRTGRDNGFLETMITRTTGQTSDNGMQSVVASSVVNSTEVAEQKDGSRQNDLGFDLNQTPQQKPSKKKKKFMPKVYVEGKPIRKPRKPATQEAVKPKATGGGKRKKAQKTNLKESAANKPAIGGVMSNTSLEVTGKSCRKALSFDLEKTGDVGLDDSGSEIFQNTSGSNSFTETRDAAGGTSGSWLDSVTQVDQTNGLVAANQPLEASTVVTLPRGSEVNHSRMLARDQQPELFTGNQQRQFPMENQQRQWPM…	BrDME1	10	JGI Phytozome	Brassica rapa FPsc v1.3	X	X
	Brara.A00413.1	1150	MEKSKDLDNFSGLVVQGTPVKPERPLKFYVRRKPPKLLNKLQNIDDSASSVSSDFNTNNTTKEESVKKSEEPETFKVDLQSLHGTQGKEKSKEETEEKNAKSTILQDDSQHVNGERKKNYSQKISKKRFHRPMIMEDGKKPRNRANLQMRTISNKRSKKEKCDEEEYIVELQTPEKQSSPKRRKNKAKKSVARTLPFDEEVISGCLEFSRSFWPSFPKGKRRMTTLRRIDFHVLISPISFPMPIWKKQSKRSSRKKNMTRWTMIALSYECIEETLSLVEIHPDDIDIKKMPPKLSLMHSNQKITDGSNEHLKKAKKIRRQDASVQTKDLHTEEKKVMNNLTLQLNYQREHNLPSLADVPLHKEDILMRSLTNITPEQSMKKTTKGVAKLIKEMEKLNIN…	BrDML3-1	1	JGI Phytozome	Brassica rapa FPsc v1.3	X	X
Z. mays (corn)	Zm00001eb241240_T002	1929	MQEELGQRMHVPHGINLCFSTSSELFQVESSIELGTAEVNPVPSEKLSANSQAVRDDAGAVEGIDMNGKPVQKPKRKKHRPKVIKEGQSAKLQKPKTPKPPKENGNQPTGKRKYVRKKGLSTPAKQIPSEGADTHTRAKPGIAQRCLDFDVEDQHGHLDLVSQTQETEIQTGPGDTQPSISGVERSNAQVSCHWGWGGTSSSIISADPIVDIQGLQADCIPKRVNFDLNNSMASQMPTNYSSRMDSSGQFFQFGLGEKVQTNQLLDYNCNLPARRVSHLSSSVDHMRHPLANFDQYISTSQVCTENSRRHYQMPSSSRISENRTAASQYTERVSMGGNFNPGACIGEGTVIKQMAQCYRLPESPLVPPKHNERDVMNGNLNEFSVYNDYLNFSSNSNYQ…	ZmDML4-1	5	JGI Phytozome	Zea mays Zm-B73-REFERENCE-NAM-5.0.55	X	X
	Zm00001eb202980_T001	1849	MQEGLGQRMHVPHGINLCIATSSMPFQAQSFIEPSTGQVNPPVTSENLSANSQAVNDAGAVEGTDMNEKSVQKPKRKKHRPKVIKEGQSAKLQKPKTPKPPKENGNQPTGKRKYVRRKGLSAPAEQIPLCADTHTRAKPGVVQRCLDFDVEDQHGHLDLVPQTQETEIQTGPADTQPSISGVERSNVQISYHWGGTSSSISSVDPIAGIHGLQADCNSKRVSFDLNNSIVSQLPTNYSSPMDSSEQFFNFDLREEVRTNQLLPHLTSSVDHTRHPSVNFDQYISTSQDCPEKSPRHYQMVSSYRILENMTTASQYTERVSMGGNFNPEACMGEDAIIKQMAQSYRPLESPFVPPNHNERDMMNGNLNEFPVKNDYLKFSTNSNYQTGAGFDHCSPDYSD…	ZmDML4-2	4	JGI Phytozome	Zea mays Zm-B73-REFERENCE-NAM-5.0.55	X	X
	Zm00001eb289030_T003	1782	MSAGRGDPNTPANRPLFLSAGVPNLGCHNVAAPAAAGNSGSIASQVLFSPCSTSVLNTIQEVPAPQSALLSPINRATEQGDVPCIQPSWNMPGGCTQVPINIIVFHRELTRRGSRPQLSPSATALPDVSEGASIRLAGSNFLSHGRTPSIVAGDMTTNSSQLATADKYNSEHRMNCLHDEASKTENGKGSTQLPQLATAIFRDSYNDLESVVPAATWETRVQHSQESTTCLAESTTDDNIHMYQSMQKRLKTQINKSEHTPLSAPTVPKEKTLTQIETQLASAEKTEMFRNEETPALKMKARKKKHRPKVIRENKPAKVQKPDSTPDGKSPNQKVKRSYVRKKRNLSSLENCSGPVSDQSISGATGVAARSRTSSVRRSLQFESKEQGLQGGHSSMANI…	ZmDML5-1	6	JGI Phytozome	Zea mays Zm-B73-REFERENCE-NAM-5.0.55	X	X
	Zm00001eb241310_T001	1078	MAEEKGRSKTDPFFTLTISAANRNTQSRARSWRGLQILPLQDSTAEFAPTTGPAAMAAAADLEPQLGISPATPDIVRKLARPSGTTTAVGYCCTALYTSTAAGPGKVDGDGLASVPLHAHEHSQSAALDNLVQVDCDPVGTQESSTLPALVGESSGKVAQQEQQHKEGVDSARDAGAASPAPTSTPENMEPTPRRRGKKSTKGVQRLKVAKDKVMKLKVTTPSTVKKKKMTEDDIQHIGAHRSNSARRKLDLDLHSSESKTCFSRAELMINLKCIGKSYGLISELTTHKRSKRGKKRKMMVGNKESGQLALLPYNWTTTVAVSRPLTHVKKLRAKVLGLTDETMRVCAVLANWNGSDNESFEGFDIGNGPEWDTTRQMFEQFVDIFINAMFDLIGPRKY…	ZmDML3-1	5	JGI Phytozome	Zea mays Zm-B73-REFERENCE-NAM-5.0.55	X	X
G. hirsutum (cotton)	Gohir.A04G066400.1	1890	MSKQGQERPVIHIELQENQIFGANCIESERCSFGFAQESQTEGVVACSDSGSCTEVNGSFNNLMAASVWSESFSCGQNPAELGNVSSVDLSAIATAVSAASTSAASVGINNHSGCGPSGLFPVHVNLSTQRNIRIAGNCTPRKNQNVIPPQNPYDYDFNLPAGPSEAFSQTSISDFAPITPDKARTAEMKEVPEIGKLYIVNITEKQDEQANELVPARLDVNVVQCSKGLQMPVLESSLTATPSKENQNSDNGGSHLAELEITTPQQKQRKRKHRPKVVTEGKPGRPRKPATPKPDGSQETPTGKRKYVRKSTVKNGTSILPGVANAEKSTGKRKYVRRKGLNKDSTIPTQEEGGKGATHPETLEHNKKPCRRALDFDTEGQEREESSACKPACNLNSS…	GhROS1(A)	4	JGI Phytozome	Gossypium hirsutum v3.1	X	X
	Gohir.A09G136700.1	1900	MSKEGQQQFQFQRPLIPVTRFWPILPKPPVIHAGRQGNEIFEANCIGSERCSYGFTQEPQADRVVACSDSSICREVNGGINNLKAASVGSNCISGYSNEQRQCSLNLGEPSNSSSADLLTLVNAASAKTTTAASLGIDRHHLESSSTGLLPVHVNLSAQQHIWVDGNCTPRKHQNVIHSQNPYDLNLPAKTMDELSDFAPITPYKSKRAERKDVSEIDLHIENRTSEKRDEQANESAAANVDVNGLQCSKELQKFVIESSLAATPSKENPNPDDGGSHLIDPNRTSQQKQRRKKHRPKVIGEGKPRTRKSVTLKPSYFQENPTGKRNYVRKNNPSQDTSTPPREANAENSTRKRKCVQTKGLNKDSTIPIQERENAPETVEQNKKSCIRALDFDEEGPD…	GhROS2(A)	9	JGI Phytozome	Gossypium hirsutum v3.1	X	X
	Gohir.A01G129700.2	1747	MPICNLNSPARTEVGAPSHFNTSFQSLLATPDQTQKTRKQNPAADENSVSEKEQESIIVCNKKEFSQQNCDLLQNIVNSSSVIISAPMEEKDSERGSVQGIDLNKTPQQKPPKRRKHRPKVIVEGKPKRTPKPTTTANVNSKDNPSGKRKYVRRKGLTELATQHADPTKASDSTAGTPAKRKYVRKKSPKEPAAELIGSANKSACDAGITIRGKCMHETNQKESASPQGDCIRDSDPSPVCAPRSCRRALNFDLENTGNGSLAGILNHQEMLSSKSSESRSMGFSSVGNSGFKTRFTTQSNQQSGLAVENPQLQAECSHSPFMKKMMPIDYMSLPGITAATASRLQAKELMENVNVMARNANMYDIDLNQNSYRNGYTSAQQAIQFVSQRRNWENIDGT…	GhDME1(A)	1	JGI Phytozome	Gossypium hirsutum v3.1	X	X
	Gohir.A05G083800.2	1609	MSGYRVYERKHKRKEQCGSVPRTPEKPTAGVPEIKEVYARRSRMKLEEKASESCSSEKKIDCDKTFDSFFNLVPLAEKDAVFDSCMALSDKEKEQSSNRTESISLGSVGKIDSKMSLDSLGMGDLLNAGEGKEQNFCPGRNFDGIEDLYLESTVCTVTSKQKEDGFNGIEGTFSGHGDSIDLDKSTYTLENSGGFNHQTDELDSTSLASAGAIDGSNILEKDWDSALSDNHFMELPCLLEPKVSQPYALSQDNGFMRETVTFDQILVNDCLDLKQSRQKPKRKIHRPKVAFDGKPNTLKLATPKQVREKKPRLATPKLVKEKKPKLVAAKWAKRKKSENVRKQASPGLNEAIIENKNLSDIKSNMIIEINETQAAVARALDFQSESLDAKPVDYARASD…	GhDML3-1(A)	5	JGI Phytozome	Gossypium hirsutum v3.1	X	X
	Gohir.D04G104500.1	1893	MSKQGQERPVIHIELQENQIFGANCIESERCSFGFAQESQTEGVVACSDSGSCTEVNGSFNNLMAASVWSESFSCGQNPAELGNVSSVDLSAIATAVSAASTSAAPVGINNHSGCGPSGLFPVHVNLSTQRNIRIAGNCTPRKNQNVIPPQNPYDYDFNLPAGPSEAFSQTSISDFAPITPDKARTAEMKEVPEIGKLNIVNITEKQDEQANELVPARLDVNVVQCSKELQMPVLKSSLTATLSKENQNSDNGGSHLAELEITTPQQKQRKRKHRPKVITEGKPRRPRKPATPKPDGSQETPTGKRKYVRKSTVKNDTSILPGVANAEKSTGKRKYVRRKGLNKDSTIPTQEGGKGATHPETLEHNKKPCRRALDFDTVGQEREESSACKPACNLNSSP…	GhROS1(D)	4	JGI Phytozome	Gossypium hirsutum v3.1	X	X
	Gohir.D09G137800.1	1949	MSKEGQEQFQFQRPLIPVTRFRPILPKPPVIHAGRRGNQIFEANCIGSERCSYGFTQEPQADRVVACSDSSICIEVNGGINNLKAASVGSNCISGYSNEQRQCSLNLGEPSNSSSADLLTLVNAASAKTTTAASLGIDRHHLRCSSTGLLPVHVNLSAQQHIWVDGNCTPRKHQNVIHSQNPYDLNLPAKTMDELSDFAPITPYKSKRAERKDVSEIDLHIENRTSEKRDEQANESAAANVDVNGLQCSKELQKLVIESSLAATPSKENQNPDDGGSHLIDLNRTQQQKQRRKKHRPKVIGEGKPRTRKSVTLKPSYSQENPTGKRNYVRKNNPSQDTSTPPGEANAENSTRKRKCVQTKGLNKDSTIPIQERENAPETLEQNKKSCIRALDFDEEGQD…	GhROS2(D)	9	JGI Phytozome	Gossypium hirsutum v3.1	X	X
	Gohir.D01G119000.1	1844	MINNIAGSYRLVLQNESSSWNDHTWANLLATRNAADGFASANRIASLGSGNTLPIPNLHSQEDNWRRCSSHQSSSSHFMRNTDGFLQMPQYGFPIPSMPVCNLNSPARTEVGAPSHFNTSFQSLLATPDQTEKTRNQNPAADENSVSEKEQESLIVCNKKQFSQQNRDLLQNIVDSSSVIISAPMEEKDSERGSVQGIDLNKTPQQKPPKRRKHRPKVIVEGKPKRTPKPTTTANVNSKDNPSGKRKYVRRKGLTEPATQHADPTKASDSTAGTPVKRKYVHKKSLKEPADELIDSANKSACDAGITIRVKCMHETNQKEPATPQGDCIRDSDPSPVCAPRSCRRALNFDLENTGNGSLAGTLNHQEMLSSKSSESHSMGFSSVGNGGFKTRFTTQSNQ…	GhDME1(D)	1	JGI Phytozome	Gossypium hirsutum v3.1	X	X
	Gohir.D05G086701.1	1495	MSLDSLGTADLLSAGEGKEQNFCPGRNFDGIEDLCLESTVCTVTSKQKEDGFNGIEGTFSGHGGSIDLDKSTYTLENSGGFNHQTDELDSTSLASAGAIDGSNILEKDWDSVLSDNHFMELPCLLEPKVSQPYALSQDKGFMRETVTFDQILVNDCLDLKQSRQKPKRKIHRPKVAFDGKPNTLKLATPKQVREKKPRLATPKLVKEKKPKLVAAKQAKRKKSENVRKQASPGLQEAIIENKNLSDIKSNMIIEINETQAAVARALDFQSESSDAKRVDYARALDFPLESLDAKPVEFAFHSFPKKRRSERRWTLNKSKMIIEINETKAAFTRTLCFQSEPVESASHSVTNKKRRSRRRRILSFFSLPVMSVTKSVKSSKKKLFTAKWLPRRKRTPRKR…	GhDML3-1(D)	5	JGI Phytozome	Gossypium hirsutum v3.1	X	X
S. tuberosum (potato)	Soltu.DM.10G024770.1	1812	MEIGQGSSWIPATPGKPNFTESPPICSNGQENQQAQVDWSDLQRKQALEHATGSTAEAQNAAAHRGSTSSVEDQCFMTSEAAVGEKSEMSEGGINMYNNFPSDNVDLWSSVSFGDLLAMAHAGGSGTTPADETAYSVKSSFQPLINAQNADESSILSSFPFNLNSPSKMTGATLSSNILFQFEPVTPDMMKIKGQASNASNLDINVTTAASVIQSNEDIIKRAEANELQQNKEQSVLILEGKLDTELNNTPEQKPRRRKHRPKVIVEGKPKRTPKPRIQKQPDSEETKTEKRKYVRRNKVGEPAATFAEEVNNTICHEGKPPSSEKTPTAKRKYVRRNQVNKSTEKPSEEGSSGTTGRPVATSAEEVKNTAFHEGKAPSSKETPTAKRNVRTNQVNMSM…	StROS1	10	JGI Phytozome	Solanum tuberosum v6.1	X	X
	Soltu.DM.09G004240.2	1834	MTPAKPSLPPIYGNRQQNRQGQINGVESQRISQGQDLSQVNQIELRDFLQEPQAQRAATCCGSTNSATVTEYFDAWEAAAGAESKMYGENNIKMCNNVSTDDVDEWSNVSFGHLLALAHAAGSTAVTENANAETNFAVNGSFNSLISSQDADGSSICSRFPFNLNSPTRMTDEDSSSNNAFPFEPITPYQIKKKGPASDAPSLDINATPIPRYVQSSKDTLKRAESNDLQQNTEKSGLVLNISELSENMIDKVVDQDAEQNNTPQQKRRKKHRPKVVIEGEHKRTPKPKTPQQHSSMGTKKEKRKDVQRNKIEDPPGTPSDEVNDMTKHKGHLPSSAKIQRARRTYIRRNQVNKFAPNPAEEGTIDPPNVSRPRRYPRRSLNFDSENILSDENSLHWPS…	StROS2	9	JGI Phytozome	Solanum tuberosum v6.1	X	X
	Soltu.DM.11G005260.1	1851	MNPGRVFSTPQENGGVQNGDPRIPFSPQKPVLPLPDLVQAEVQRNQIEMTGWPDLLGMYGDFLLMPASETGVVQNPVTSVSWDKGSTGHWSDVAVCNRSSDFDINSCENVPDHSKPACTRVNSLEELIGMKNQSNMLSTHGRSNNSIHLSDIPILRNSYARVDSRYEQPRLKAAGQTLLNESQVFISPNQTFDCYNRHLPLDGMRSPYQVNRSLLSPLASDAGTSPSTNSFFTFAPVTPEHNHFNDNQHFERQNVPIQERSSLEKDGQENVLGSMKSKDDHSDKLLQRVTDSVVVNSPLTEKVDNGNVGNVDIDLNKTPASKTPKRRKHRPKVVIEGETKRTPKRAAPGDGTPNENPSGKRKYVRRDGLKASTTEQTEVNESAAQRNSTPNENPSGKRK…	StDME1	11	JGI Phytozome	Solanum tuberosum v6.1	X	X
	Soltu.DM.04G021680.1	931	MGKDSEKDGLRVTKTPVKLEAESHFQHNNSYWLRPRKGKEIFSSEAVKRYFLRQRKIVKERLSLGADNEEKDRYKGSKKCSSKKLGSLSVPSKTLQVYHRRRNKCEKVQPLIIEGHNKPVQANDSTTNVVPLSSSHPNYATNYPLQVYNRRFKKNQRYNKCKTVEPSFQEGQNKKRKTSTASTTKGLKDSPHKKPRLQESSSKSGLIVKHNKNSQINHNKKDAQVPTNETPSDTDKMILRTKVILDEETIREWKFLMEKPEHKGCKSEKCDQRWEIERTLFHGRVISFISRMHLIQGNRQFSQWKGSIVDSVAGVFLAQNVADNLSSSAFMSLAAQYPCNEVRFKSTFHNGNGTKLEKSSKGSSNIKNQGIIRRTNPKRGAKKKETRNQQSEPILRRKS…	StDML3-2	4	JGI Phytozome	Solanum tuberosum v6.1	X	X
	Soltu.DM.04G017430.1	889	MSFFPQIIVIGFDQGKERRYLVREQVINQICSKGSVSLGLSGSALLSKSILTVKRYFLRQRKIVKERLISLGADNEEKHSYKDSKKSSSEKLGSLSVPSKPLQVYNRRFKKNQIYNNCKTVLPAFQEWQNMKRKTSKVSTTEGLKDSPGKAASLCIHKKPRLQESSSKNGLIVKHKKNSQIHHKKKDAQVSTDETPSDTDKMILRSKVILDEETIREWKSLMGKPEHEGCKSEKCDERWEIQRTLFHGRVISFISRMHLIQGNRQFSQWKGSIVDSVAGVFLAQNVTDNISSSAFMSLAAQYPCNEVSFKSTFHNGNGKTKLEKSYKGSSNIKNQGIIRRTNLKGGKKKKETRNQQSEPILRRKSQNADMESEAITRENIRKFSSIVNPKEINDSTLDA…	StDML3-3	4	JGI Phytozome	Solanum tuberosum v6.1	X	X
	Soltu.DM.03G037240.1	1468	MTKLNPFNPTSFTAPFTFTSTSILCCGNSEMELGNADQEELEKTVFFTPLTPFKCMPAATEFNSGLNNFWSTNSSYNSQKKDEEVSGVIGGRSEFLSRHLDGGSKSATMAPSTPMTKGDNPRKKQCGSVDMNERPLKKPRMRKHTPKIFDESKPKKTPKPKIRPSIPKSGKSKASAKTKKKIEKDCDKVSDDLSGDAYMQTPNSKIPETIPGSLVLQVSTPQLEILEHAIPAISPPDLEHDILTDLGHVLKSCKRSLPFNLENEDDVLSIGAAEVIRNHVTQSYNKFLTNPLDGFNEQAVDTNCSIGLEDNLEAESQPNQGNDPSIYQDDQRACQHHFLKVYVRRKTQIDLMPLAGNEAHVYQNNHGTISPSSCRDHSVKVYKRRTKGNIGAMPLAGNE…	StDML3-1	3	JGI Phytozome	Solanum tuberosum v6.1	X	X
C. japonica (japanese cedar)	XP_057827199.2	1804	MLMENNQRERNMADILKGGSFSSPAMDNKRERSMTDILKEDLSTPGVPPNESQISPATPLRPIARKRKLVFDDEPLLPPRQTHAASKQSLGFRAETGPSDKSSNGVHSIRSPLKPHSAEEPVAVNMNTTLENVPHQQPYYMCASGKDSDTDGILGFKTAKESDALFRNAQRLLNAVNRSVCGIPNANVSIPNANLMNANYHQPINPSGNICLNGWSRPSYPYFSPFARYPSGILAPHYLHSTTILPHHQTFTSLPNNGFSLAPETPEKNIHIERLRKRHFVDRHSDESVVIQENQKDTPEKSIQDEEKLLKTQSSHFVSYGSDEMVDVQERQQEIISMSTYADVEASAGCGDESILPSLIDPLSFTLQTPTKNNEHQLAAGGEGNGGIDLNKTPTQKPK…	C.japonica	9	NCBI Database	Sugi_1.0	X	X

## Sheet: Table S3
MCScanX Collinearity Data
## Alignment 1624: score=287.0 e_value=6.2e-06 N=8 Gm03&Gm05 plus
1624- 0:	Glyma.03G188700.Wm82.a6.v1	Glyma.05G028300.Wm82.a6.v1	5e-55
1624- 1:	Glyma.03G189400.Wm82.a6.v1	Glyma.05G030000.Wm82.a6.v1	1e-28
1624- 2:	Glyma.03G189800.Wm82.a6.v1	Glyma.05G030100.Wm82.a6.v1	1e-81
1624- 3:	Glyma.03G190300.Wm82.a6.v1	Glyma.05G032300.Wm82.a6.v1	4e-51
1624- 4:	Glyma.03G190800.Wm82.a6.v1	Glyma.05G034033.Wm82.a6.v1	4e-15
1624- 5:	Glyma.03G191000.Wm82.a6.v1	Glyma.05G036600.Wm82.a6.v1	1e-46
1624- 6:	Glyma.03G193000.Wm82.a6.v1	Glyma.05G037200.Wm82.a6.v1	1e-07
1624- 7:	Glyma.03G195400.Wm82.a6.v1	Glyma.05G038000.Wm82.a6.v1	5e-12
## Alignment 1763: score=11253.0 e_value=0 N=235 Gm03&Gm10 plus
1763- 0:	Glyma.03G143400.Wm82.a6.v1	Glyma.10G022200.Wm82.a6.v1	8e-09
1763- 1:	Glyma.03G145600.Wm82.a6.v1	Glyma.10G022500.Wm82.a6.v1	3e-86
1763- 2:	Glyma.03G148300.Wm82.a6.v1	Glyma.10G022900.Wm82.a6.v1	0
1763- 3:	Glyma.03G148500.Wm82.a6.v1	Glyma.10G023100.Wm82.a6.v1	0
1763- 4:	Glyma.03G148600.Wm82.a6.v1	Glyma.10G023200.Wm82.a6.v1	2e-33
1763- 5:	Glyma.03G148800.Wm82.a6.v1	Glyma.10G023300.Wm82.a6.v1	0
1763- 6:	Glyma.03G149101.Wm82.a6.v1	Glyma.10G023400.Wm82.a6.v1	8e-69
1763- 7:	Glyma.03G149500.Wm82.a6.v1	Glyma.10G023500.Wm82.a6.v1	0
1763- 8:	Glyma.03G149800.Wm82.a6.v1	Glyma.10G023800.Wm82.a6.v1	9e-121
1763- 9:	Glyma.03G149900.Wm82.a6.v1	Glyma.10G023900.Wm82.a6.v1	0
1763- 10:	Glyma.03G150100.Wm82.a6.v1	Glyma.10G024000.Wm82.a6.v1	5e-20
1763- 11:	Glyma.03G150700.Wm82.a6.v1	Glyma.10G024200.Wm82.a6.v1	4e-180
1763- 12:	Glyma.03G150800.Wm82.a6.v1	Glyma.10G024300.Wm82.a6.v1	0
1763- 13:	Glyma.03G151400.Wm82.a6.v1	Glyma.10G024500.Wm82.a6.v1	0
1763- 14:	Glyma.03G151500.Wm82.a6.v1	Glyma.10G024600.Wm82.a6.v1	2e-97
1763- 15:	Glyma.03G151601.Wm82.a6.v1	Glyma.10G024900.Wm82.a6.v1	3e-19
1763- 16:	Glyma.03G151700.Wm82.a6.v1	Glyma.10G025200.Wm82.a6.v1	2e-41
1763- 17:	Glyma.03G151800.Wm82.a6.v1	Glyma.10G025300.Wm82.a6.v1	9e-142
1763- 18:	Glyma.03G151900.Wm82.a6.v1	Glyma.10G025600.Wm82.a6.v1	4e-42
1763- 19:	Glyma.03G152300.Wm82.a6.v1	Glyma.10G025700.Wm82.a6.v1	0
1763- 20:	Glyma.03G152600.Wm82.a6.v1	Glyma.10G025800.Wm82.a6.v1	1e-51
1763- 21:	Glyma.03G152700.Wm82.a6.v1	Glyma.10G025900.Wm82.a6.v1	2e-133
1763- 22:	Glyma.03G152800.Wm82.a6.v1	Glyma.10G026000.Wm82.a6.v1	0
1763- 23:	Glyma.03G153200.Wm82.a6.v1	Glyma.10G026100.Wm82.a6.v1	1e-72
1763- 24:	Glyma.03G153300.Wm82.a6.v1	Glyma.10G026200.Wm82.a6.v1	0
1763- 25:	Glyma.03G153400.Wm82.a6.v1	Glyma.10G026300.Wm82.a6.v1	2e-68
1763- 26:	Glyma.03G154200.Wm82.a6.v1	Glyma.10G026800.Wm82.a6.v1	0
1763- 27:	Glyma.03G155300.Wm82.a6.v1	Glyma.10G027200.Wm82.a6.v1	1e-173
1763- 28:	Glyma.03G155600.Wm82.a6.v1	Glyma.10G027500.Wm82.a6.v1	3e-59
1763- 29:	Glyma.03G155700.Wm82.a6.v1	Glyma.10G027800.Wm82.a6.v1	7e-51
1763- 30:	Glyma.03G155800.Wm82.a6.v1	Glyma.10G027900.Wm82.a6.v1	2e-103
1763- 31:	Glyma.03G156000.Wm82.a6.v1	Glyma.10G028000.Wm82.a6.v1	0
1763- 32:	Glyma.03G156100.Wm82.a6.v1	Glyma.10G028100.Wm82.a6.v1	5e-34
1763- 33:	Glyma.03G156400.Wm82.a6.v1	Glyma.10G028400.Wm82.a6.v1	0
1763- 34:	Glyma.03G156600.Wm82.a6.v1	Glyma.10G028800.Wm82.a6.v1	0
1763- 35:	Glyma.03G156700.Wm82.a6.v1	Glyma.10G028900.Wm82.a6.v1	0
1763- 36:	Glyma.03G156800.Wm82.a6.v1	Glyma.10G029000.Wm82.a6.v1	0
1763- 37:	Glyma.03G157000.Wm82.a6.v1	Glyma.10G029300.Wm82.a6.v1	0
1763- 38:	Glyma.03G157100.Wm82.a6.v1	Glyma.10G029400.Wm82.a6.v1	3e-28
1763- 39:	Glyma.03G157200.Wm82.a6.v1	Glyma.10G029500.Wm82.a6.v1	0
1763- 40:	Glyma.03G157300.Wm82.a6.v1	Glyma.10G029600.Wm82.a6.v1	6e-151
1763- 41:	Glyma.03G157432.Wm82.a6.v1	Glyma.10G029700.Wm82.a6.v1	0
1763- 42:	Glyma.03G157800.Wm82.a6.v1	Glyma.10G030500.Wm82.a6.v1	2e-74
1763- 43:	Glyma.03G158000.Wm82.a6.v1	Glyma.10G031100.Wm82.a6.v1	5e-131
1763- 44:	Glyma.03G158100.Wm82.a6.v1	Glyma.10G031200.Wm82.a6.v1	2e-92
1763- 45:	Glyma.03G158500.Wm82.a6.v1	Glyma.10G031600.Wm82.a6.v1	2e-159
1763- 46:	Glyma.03G158600.Wm82.a6.v1	Glyma.10G031800.Wm82.a6.v1	1e-98
1763- 47:	Glyma.03G158900.Wm82.a6.v1	Glyma.10G032000.Wm82.a6.v1	0
1763- 48:	Glyma.03G159100.Wm82.a6.v1	Glyma.10G032200.Wm82.a6.v1	4e-54
1763- 49:	Glyma.03G159200.Wm82.a6.v1	Glyma.10G032400.Wm82.a6.v1	0
1763- 50:	Glyma.03G159500.Wm82.a6.v1	Glyma.10G032500.Wm82.a6.v1	0
1763- 51:	Glyma.03G159600.Wm82.a6.v1	Glyma.10G032600.Wm82.a6.v1	2e-55
1763- 52:	Glyma.03G159700.Wm82.a6.v1	Glyma.10G032900.Wm82.a6.v1	4e-175
1763- 53:	Glyma.03G159900.Wm82.a6.v1	Glyma.10G033501.Wm82.a6.v1	9e-69
1763- 54:	Glyma.03G160000.Wm82.a6.v1	Glyma.10G033900.Wm82.a6.v1	0
1763- 55:	Glyma.03G160400.Wm82.a6.v1	Glyma.10G034351.Wm82.a6.v1	2e-11
1763- 56:	Glyma.03G160700.Wm82.a6.v1	Glyma.10G034600.Wm82.a6.v1	1e-55
1763- 57:	Glyma.03G161000.Wm82.a6.v1	Glyma.10G034800.Wm82.a6.v1	3e-81
1763- 58:	Glyma.03G161400.Wm82.a6.v1	Glyma.10G035000.Wm82.a6.v1	1e-102
1763- 59:	Glyma.03G161600.Wm82.a6.v1	Glyma.10G035300.Wm82.a6.v1	3e-92
1763- 60:	Glyma.03G161800.Wm82.a6.v1	Glyma.10G035400.Wm82.a6.v1	0
1763- 61:	Glyma.03G162100.Wm82.a6.v1	Glyma.10G035800.Wm82.a6.v1	0
1763- 62:	Glyma.03G162300.Wm82.a6.v1	Glyma.10G036000.Wm82.a6.v1	5e-30
1763- 63:	Glyma.03G162400.Wm82.a6.v1	Glyma.10G036200.Wm82.a6.v1	4e-33
1763- 64:	Glyma.03G162800.Wm82.a6.v1	Glyma.10G036800.Wm82.a6.v1	0
1763- 65:	Glyma.03G163100.Wm82.a6.v1	Glyma.10G037002.Wm82.a6.v1	2e-94
1763- 66:	Glyma.03G163467.Wm82.a6.v1	Glyma.10G037100.Wm82.a6.v1	7e-74
1763- 67:	Glyma.03G163750.Wm82.a6.v1	Glyma.10G037400.Wm82.a6.v1	4e-59
1763- 68:	Glyma.03G163900.Wm82.a6.v1	Glyma.10G037500.Wm82.a6.v1	0
1763- 69:	Glyma.03G164000.Wm82.a6.v1	Glyma.10G037600.Wm82.a6.v1	2e-87
1763- 70:	Glyma.03G164200.Wm82.a6.v1	Glyma.10G037700.Wm82.a6.v1	1e-157
1763- 71:	Glyma.03G164300.Wm82.a6.v1	Glyma.10G037900.Wm82.a6.v1	0
1763- 72:	Glyma.03G164400.Wm82.a6.v1	Glyma.10G038000.Wm82.a6.v1	0
1763- 73:	Glyma.03G164600.Wm82.a6.v1	Glyma.10G038400.Wm82.a6.v1	0
1763- 74:	Glyma.03G164700.Wm82.a6.v1	Glyma.10G038600.Wm82.a6.v1	0
1763- 75:	Glyma.03G164900.Wm82.a6.v1	Glyma.10G038900.Wm82.a6.v1	1e-16
1763- 76:	Glyma.03G165300.Wm82.a6.v1	Glyma.10G039100.Wm82.a6.v1	8e-26
1763- 77:	Glyma.03G165400.Wm82.a6.v1	Glyma.10G039200.Wm82.a6.v1	0
1763- 78:	Glyma.03G166000.Wm82.a6.v1	Glyma.10G039500.Wm82.a6.v1	1e-86
1763- 79:	Glyma.03G166400.Wm82.a6.v1	Glyma.10G039700.Wm82.a6.v1	0
1763- 80:	Glyma.03G166600.Wm82.a6.v1	Glyma.10G039800.Wm82.a6.v1	3e-21
1763- 81:	Glyma.03G166700.Wm82.a6.v1	Glyma.10G039900.Wm82.a6.v1	2e-99
1763- 82:	Glyma.03G166800.Wm82.a6.v1	Glyma.10G040100.Wm82.a6.v1	0
1763- 83:	Glyma.03G167400.Wm82.a6.v1	Glyma.10G040400.Wm82.a6.v1	8e-91
1763- 84:	Glyma.03G167500.Wm82.a6.v1	Glyma.10G040500.Wm82.a6.v1	0
1763- 85:	Glyma.03G167650.Wm82.a6.v1	Glyma.10G040700.Wm82.a6.v1	0
1763- 86:	Glyma.03G168700.Wm82.a6.v1	Glyma.10G041000.Wm82.a6.v1	0
1763- 87:	Glyma.03G168900.Wm82.a6.v1	Glyma.10G041200.Wm82.a6.v1	3e-62
1763- 88:	Glyma.03G169200.Wm82.a6.v1	Glyma.10G041300.Wm82.a6.v1	0
1763- 89:	Glyma.03G169300.Wm82.a6.v1	Glyma.10G041400.Wm82.a6.v1	6e-179
1763- 90:	Glyma.03G169500.Wm82.a6.v1	Glyma.10G041700.Wm82.a6.v1	0
1763- 91:	Glyma.03G169600.Wm82.a6.v1	Glyma.10G041800.Wm82.a6.v1	0
1763- 92:	Glyma.03G169700.Wm82.a6.v1	Glyma.10G042300.Wm82.a6.v1	0
1763- 93:	Glyma.03G170000.Wm82.a6.v1	Glyma.10G042600.Wm82.a6.v1	0
1763- 94:	Glyma.03G170300.Wm82.a6.v1	Glyma.10G042800.Wm82.a6.v1	4e-167
1763- 95:	Glyma.03G170400.Wm82.a6.v1	Glyma.10G042950.Wm82.a6.v1	2e-43
1763- 96:	Glyma.03G170600.Wm82.a6.v1	Glyma.10G043000.Wm82.a6.v1	0
1763- 97:	Glyma.03G170800.Wm82.a6.v1	Glyma.10G043100.Wm82.a6.v1	2e-11
1763- 98:	Glyma.03G171000.Wm82.a6.v1	Glyma.10G043200.Wm82.a6.v1	0
1763- 99:	Glyma.03G171800.Wm82.a6.v1	Glyma.10G043600.Wm82.a6.v1	0
1763-100:	Glyma.03G171900.Wm82.a6.v1	Glyma.10G043700.Wm82.a6.v1	0
1763-101:	Glyma.03G172000.Wm82.a6.v1	Glyma.10G043800.Wm82.a6.v1	4e-39
1763-102:	Glyma.03G172400.Wm82.a6.v1	Glyma.10G044400.Wm82.a6.v1	4e-72
1763-103:	Glyma.03G172700.Wm82.a6.v1	Glyma.10G044700.Wm82.a6.v1	3e-135
1763-104:	Glyma.03G172900.Wm82.a6.v1	Glyma.10G044800.Wm82.a6.v1	7e-180
1763-105:	Glyma.03G173000.Wm82.a6.v1	Glyma.10G045100.Wm82.a6.v1	0
1763-106:	Glyma.03G173100.Wm82.a6.v1	Glyma.10G045200.Wm82.a6.v1	2e-65
1763-107:	Glyma.03G173900.Wm82.a6.v1	Glyma.10G045600.Wm82.a6.v1	0
1763-108:	Glyma.03G174100.Wm82.a6.v1	Glyma.10G045700.Wm82.a6.v1	5e-121
1763-109:	Glyma.03G174300.Wm82.a6.v1	Glyma.10G046000.Wm82.a6.v1	0
1763-110:	Glyma.03G174700.Wm82.a6.v1	Glyma.10G046200.Wm82.a6.v1	1e-68
1763-111:	Glyma.03G174900.Wm82.a6.v1	Glyma.10G046400.Wm82.a6.v1	2e-106
1763-112:	Glyma.03G175000.Wm82.a6.v1	Glyma.10G046500.Wm82.a6.v1	7e-167
1763-113:	Glyma.03G175100.Wm82.a6.v1	Glyma.10G046800.Wm82.a6.v1	1e-57
1763-114:	Glyma.03G175700.Wm82.a6.v1	Glyma.10G046900.Wm82.a6.v1	4e-95
1763-115:	Glyma.03G175800.Wm82.a6.v1	Glyma.10G047100.Wm82.a6.v1	8e-172
1763-116:	Glyma.03G176000.Wm82.a6.v1	Glyma.10G047400.Wm82.a6.v1	8e-58
1763-117:	Glyma.03G176100.Wm82.a6.v1	Glyma.10G047500.Wm82.a6.v1	0
1763-118:	Glyma.03G176300.Wm82.a6.v1	Glyma.10G047700.Wm82.a6.v1	4e-127
1763-119:	Glyma.03G176500.Wm82.a6.v1	Glyma.10G047900.Wm82.a6.v1	0
1763-120:	Glyma.03G176800.Wm82.a6.v1	Glyma.10G048200.Wm82.a6.v1	6e-152
1763-121:	Glyma.03G177100.Wm82.a6.v1	Glyma.10G048400.Wm82.a6.v1	0
1763-122:	Glyma.03G177300.Wm82.a6.v1	Glyma.10G048500.Wm82.a6.v1	6e-123
1763-123:	Glyma.03G177400.Wm82.a6.v1	Glyma.10G048600.Wm82.a6.v1	0
1763-124:	Glyma.03G177600.Wm82.a6.v1	Glyma.10G048800.Wm82.a6.v1	0
1763-125:	Glyma.03G177700.Wm82.a6.v1	Glyma.10G048900.Wm82.a6.v1	6e-49
1763-126:	Glyma.03G178000.Wm82.a6.v1	Glyma.10G049400.Wm82.a6.v1	6e-102
1763-127:	Glyma.03G178100.Wm82.a6.v1	Glyma.10G049600.Wm82.a6.v1	0
1763-128:	Glyma.03G178200.Wm82.a6.v1	Glyma.10G050000.Wm82.a6.v1	0
1763-129:	Glyma.03G178300.Wm82.a6.v1	Glyma.10G050100.Wm82.a6.v1	6e-167
1763-130:	Glyma.03G178700.Wm82.a6.v1	Glyma.10G050500.Wm82.a6.v1	2e-52
1763-131:	Glyma.03G179000.Wm82.a6.v1	Glyma.10G050700.Wm82.a6.v1	9e-27
1763-132:	Glyma.03G179300.Wm82.a6.v1	Glyma.10G051200.Wm82.a6.v1	0
1763-133:	Glyma.03G179500.Wm82.a6.v1	Glyma.10G051400.Wm82.a6.v1	2e-165
1763-134:	Glyma.03G179700.Wm82.a6.v1	Glyma.10G051500.Wm82.a6.v1	0
1763-135:	Glyma.03G180100.Wm82.a6.v1	Glyma.10G051600.Wm82.a6.v1	0
1763-136:	Glyma.03G180200.Wm82.a6.v1	Glyma.10G051800.Wm82.a6.v1	4e-130
1763-137:	Glyma.03G180300.Wm82.a6.v1	Glyma.10G051900.Wm82.a6.v1	6e-174
1763-138:	Glyma.03G180500.Wm82.a6.v1	Glyma.10G052000.Wm82.a6.v1	2e-147
1763-139:	Glyma.03G180600.Wm82.a6.v1	Glyma.10G052500.Wm82.a6.v1	0
1763-140:	Glyma.03G180700.Wm82.a6.v1	Glyma.10G052700.Wm82.a6.v1	8e-68
1763-141:	Glyma.03G180950.Wm82.a6.v1	Glyma.10G052851.Wm82.a6.v1	2e-09
1763-142:	Glyma.03G181100.Wm82.a6.v1	Glyma.10G053200.Wm82.a6.v1	9e-39
1763-143:	Glyma.03G181300.Wm82.a6.v1	Glyma.10G053800.Wm82.a6.v1	1e-155
1763-144:	Glyma.03G182100.Wm82.a6.v1	Glyma.10G055600.Wm82.a6.v1	3e-07
1763-145:	Glyma.03G182900.Wm82.a6.v1	Glyma.10G057000.Wm82.a6.v1	4e-59
1763-146:	Glyma.03G183600.Wm82.a6.v1	Glyma.10G057700.Wm82.a6.v1	3e-09
1763-147:	Glyma.03G184800.Wm82.a6.v1	Glyma.10G058600.Wm82.a6.v1	0
1763-148:	Glyma.03G184900.Wm82.a6.v1	Glyma.10G058702.Wm82.a6.v1	1e-54
1763-149:	Glyma.03G185100.Wm82.a6.v1	Glyma.10G058800.Wm82.a6.v1	0
1763-150:	Glyma.03G185200.Wm82.a6.v1	Glyma.10G058900.Wm82.a6.v1	0
1763-151:	Glyma.03G185400.Wm82.a6.v1	Glyma.10G059101.Wm82.a6.v1	4e-44
1763-152:	Glyma.03G185500.Wm82.a6.v1	Glyma.10G059200.Wm82.a6.v1	6e-103
1763-153:	Glyma.03G185800.Wm82.a6.v1	Glyma.10G059500.Wm82.a6.v1	0
1763-154:	Glyma.03G185900.Wm82.a6.v1	Glyma.10G059601.Wm82.a6.v1	2e-28
1763-155:	Glyma.03G186100.Wm82.a6.v1	Glyma.10G059700.Wm82.a6.v1	6e-75
1763-156:	Glyma.03G186200.Wm82.a6.v1	Glyma.10G059900.Wm82.a6.v1	1e-133
1763-157:	Glyma.03G186300.Wm82.a6.v1	Glyma.10G060000.Wm82.a6.v1	0
1763-158:	Glyma.03G186900.Wm82.a6.v1	Glyma.10G062200.Wm82.a6.v1	0
1763-159:	Glyma.03G187900.Wm82.a6.v1	Glyma.10G063000.Wm82.a6.v1	0
1763-160:	Glyma.03G188000.Wm82.a6.v1	Glyma.10G063200.Wm82.a6.v1	3e-126
1763-161:	Glyma.03G188100.Wm82.a6.v1	Glyma.10G063400.Wm82.a6.v1	7e-93
1763-162:	Glyma.03G188400.Wm82.a6.v1	Glyma.10G063600.Wm82.a6.v1	0
1763-163:	Glyma.03G188500.Wm82.a6.v1	Glyma.10G063700.Wm82.a6.v1	0
1763-164:	Glyma.03G188800.Wm82.a6.v1	Glyma.10G063900.Wm82.a6.v1	1e-129
1763-165:	Glyma.03G189100.Wm82.a6.v1	Glyma.10G064200.Wm82.a6.v1	0
1763-166:	Glyma.03G189200.Wm82.a6.v1	Glyma.10G064400.Wm82.a6.v1	2e-45
1763-167:	Glyma.03G189400.Wm82.a6.v1	Glyma.10G064700.Wm82.a6.v1	1e-77
1763-168:	Glyma.03G189500.Wm82.a6.v1	Glyma.10G064800.Wm82.a6.v1	0
1763-169:	Glyma.03G189600.Wm82.a6.v1	Glyma.10G064900.Wm82.a6.v1	2e-166
1763-170:	Glyma.03G189700.Wm82.a6.v1	Glyma.10G065000.Wm82.a6.v1	0
1763-171:	Glyma.03G189800.Wm82.a6.v1	Glyma.10G065200.Wm82.a6.v1	0
1763-172:	Glyma.03G190000.Wm82.a6.v1	Glyma.10G065400.Wm82.a6.v1	0
1763-173:	Glyma.03G190200.Wm82.a6.v1	Glyma.10G065600.Wm82.a6.v1	0
1763-174:	Glyma.03G190800.Wm82.a6.v1	Glyma.10G065900.Wm82.a6.v1	0
1763-175:	Glyma.03G191000.Wm82.a6.v1	Glyma.10G066000.Wm82.a6.v1	0
1763-176:	Glyma.03G191100.Wm82.a6.v1	Glyma.10G066100.Wm82.a6.v1	3e-153
1763-177:	Glyma.03G191200.Wm82.a6.v1	Glyma.10G066300.Wm82.a6.v1	0
1763-178:	Glyma.03G191500.Wm82.a6.v1	Glyma.10G066700.Wm82.a6.v1	0
1763-179:	Glyma.03G191700.Wm82.a6.v1	Glyma.10G066800.Wm82.a6.v1	0
1763-180:	Glyma.03G191800.Wm82.a6.v1	Glyma.10G066900.Wm82.a6.v1	6e-70
1763-181:	Glyma.03G192000.Wm82.a6.v1	Glyma.10G067100.Wm82.a6.v1	2e-113
1763-182:	Glyma.03G192200.Wm82.a6.v1	Glyma.10G067200.Wm82.a6.v1	2e-105
1763-183:	Glyma.03G193000.Wm82.a6.v1	Glyma.10G067400.Wm82.a6.v1	0
1763-184:	Glyma.03G193100.Wm82.a6.v1	Glyma.10G067800.Wm82.a6.v1	8e-33
1763-185:	Glyma.03G193200.Wm82.a6.v1	Glyma.10G067900.Wm82.a6.v1	2e-102
1763-186:	Glyma.03G193400.Wm82.a6.v1	Glyma.10G068000.Wm82.a6.v1	0
1763-187:	Glyma.03G193600.Wm82.a6.v1	Glyma.10G070500.Wm82.a6.v1	6e-165
1763-188:	Glyma.03G193700.Wm82.a6.v1	Glyma.10G070600.Wm82.a6.v1	3e-53
1763-189:	Glyma.03G194000.Wm82.a6.v1	Glyma.10G070900.Wm82.a6.v1	2e-76
1763-190:	Glyma.03G194100.Wm82.a6.v1	Glyma.10G071000.Wm82.a6.v1	0
1763-191:	Glyma.03G194300.Wm82.a6.v1	Glyma.10G071100.Wm82.a6.v1	1e-27
1763-192:	Glyma.03G194700.Wm82.a6.v1	Glyma.10G071400.Wm82.a6.v1	2e-107
1763-193:	Glyma.03G194800.Wm82.a6.v1	Glyma.10G071500.Wm82.a6.v1	0
1763-194:	Glyma.03G195200.Wm82.a6.v1	Glyma.10G071800.Wm82.a6.v1	0
1763-195:	Glyma.03G195300.Wm82.a6.v1	Glyma.10G072000.Wm82.a6.v1	1e-46
1763-196:	Glyma.03G196300.Wm82.a6.v1	Glyma.10G072400.Wm82.a6.v1	9e-56
1763-197:	Glyma.03G196500.Wm82.a6.v1	Glyma.10G073600.Wm82.a6.v1	5e-94
1763-198:	Glyma.03G196600.Wm82.a6.v1	Glyma.10G073700.Wm82.a6.v1	0
1763-199:	Glyma.03G197200.Wm82.a6.v1	Glyma.10G074500.Wm82.a6.v1	1e-62
1763-200:	Glyma.03G197400.Wm82.a6.v1	Glyma.10G074800.Wm82.a6.v1	0
1763-201:	Glyma.03G198100.Wm82.a6.v1	Glyma.10G075300.Wm82.a6.v1	0
1763-202:	Glyma.03G198600.Wm82.a6.v1	Glyma.10G075800.Wm82.a6.v1	6e-116
1763-203:	Glyma.03G198700.Wm82.a6.v1	Glyma.10G075900.Wm82.a6.v1	2e-172
1763-204:	Glyma.03G199000.Wm82.a6.v1	Glyma.10G076100.Wm82.a6.v1	3e-91
1763-205:	Glyma.03G199800.Wm82.a6.v1	Glyma.10G076600.Wm82.a6.v1	2e-35
1763-206:	Glyma.03G199900.Wm82.a6.v1	Glyma.10G077600.Wm82.a6.v1	7e-102
1763-207:	Glyma.03G200100.Wm82.a6.v1	Glyma.10G077700.Wm82.a6.v1	1e-56
1763-208:	Glyma.03G200400.Wm82.a6.v1	Glyma.10G077900.Wm82.a6.v1	2e-78
1763-209:	Glyma.03G200500.Wm82.a6.v1	Glyma.10G078000.Wm82.a6.v1	2e-20
1763-210:	Glyma.03G200800.Wm82.a6.v1	Glyma.10G078500.Wm82.a6.v1	2e-142
1763-211:	Glyma.03G200900.Wm82.a6.v1	Glyma.10G078566.Wm82.a6.v1	0
1763-212:	Glyma.03G201000.Wm82.a6.v1	Glyma.10G079400.Wm82.a6.v1	1e-79
1763-213:	Glyma.03G201100.Wm82.a6.v1	Glyma.10G080751.Wm82.a6.v1	2e-05
1763-214:	Glyma.03G201700.Wm82.a6.v1	Glyma.10G081100.Wm82.a6.v1	2e-55
1763-215:	Glyma.03G202000.Wm82.a6.v1	Glyma.10G081300.Wm82.a6.v1	0
1763-216:	Glyma.03G202300.Wm82.a6.v1	Glyma.10G081700.Wm82.a6.v1	0
1763-217:	Glyma.03G202600.Wm82.a6.v1	Glyma.10G081900.Wm82.a6.v1	0
1763-218:	Glyma.03G202800.Wm82.a6.v1	Glyma.10G082400.Wm82.a6.v1	2e-114
1763-219:	Glyma.03G202900.Wm82.a6.v1	Glyma.10G082600.Wm82.a6.v1	1e-104
1763-220:	Glyma.03G203000.Wm82.a6.v1	Glyma.10G082800.Wm82.a6.v1	8e-159
1763-221:	Glyma.03G203400.Wm82.a6.v1	Glyma.10G083100.Wm82.a6.v1	4e-71
1763-222:	Glyma.03G203500.Wm82.a6.v1	Glyma.10G083400.Wm82.a6.v1	5e-114
1763-223:	Glyma.03G203600.Wm82.a6.v1	Glyma.10G083500.Wm82.a6.v1	0
1763-224:	Glyma.03G203900.Wm82.a6.v1	Glyma.10G083700.Wm82.a6.v1	0
1763-225:	Glyma.03G204100.Wm82.a6.v1	Glyma.10G084000.Wm82.a6.v1	0
1763-226:	Glyma.03G204200.Wm82.a6.v1	Glyma.10G084200.Wm82.a6.v1	2e-125
1763-227:	Glyma.03G204400.Wm82.a6.v1	Glyma.10G084500.Wm82.a6.v1	0
1763-228:	Glyma.03G204500.Wm82.a6.v1	Glyma.10G084600.Wm82.a6.v1	4e-44
1763-229:	Glyma.03G204600.Wm82.a6.v1	Glyma.10G086500.Wm82.a6.v1	2e-24
1763-230:	Glyma.03G204800.Wm82.a6.v1	Glyma.10G086800.Wm82.a6.v1	0
1763-231:	Glyma.03G205300.Wm82.a6.v1	Glyma.10G087300.Wm82.a6.v1	0
1763-232:	Glyma.03G205400.Wm82.a6.v1	Glyma.10G087500.Wm82.a6.v1	2e-167
1763-233:	Glyma.03G205900.Wm82.a6.v1	Glyma.10G088000.Wm82.a6.v1	0
1763-234:	Glyma.03G206100.Wm82.a6.v1	Glyma.10G088100.Wm82.a6.v1	2e-77
## Alignment 1770: score=417.0 e_value=4.5e-07 N=9 Gm03&Gm10 plus
1770- 0:	Glyma.03G189900.Wm82.a6.v1	Glyma.10G200800.Wm82.a6.v1	2e-114
1770- 1:	Glyma.03G190000.Wm82.a6.v1	Glyma.10G201200.Wm82.a6.v1	8e-130
1770- 2:	Glyma.03G190200.Wm82.a6.v1	Glyma.10G201700.Wm82.a6.v1	0
1770- 3:	Glyma.03G190800.Wm82.a6.v1	Glyma.10G202150.Wm82.a6.v1	0
1770- 4:	Glyma.03G191700.Wm82.a6.v1	Glyma.10G202300.Wm82.a6.v1	9e-102
1770- 5:	Glyma.03G192100.Wm82.a6.v1	Glyma.10G202700.Wm82.a6.v1	8e-64
1770- 6:	Glyma.03G192600.Wm82.a6.v1	Glyma.10G203000.Wm82.a6.v1	0
1770- 7:	Glyma.03G193000.Wm82.a6.v1	Glyma.10G203100.Wm82.a6.v1	2e-127
1770- 8:	Glyma.03G193500.Wm82.a6.v1	Glyma.10G203500.Wm82.a6.v1	3e-15
## Alignment 1869: score=6935.0 e_value=5.8e-314 N=145 Gm03&Gm13 plus
1869- 0:	Glyma.03G156800.Wm82.a6.v1	Glyma.13G119500.Wm82.a6.v1	2e-23
1869- 1:	Glyma.03G158500.Wm82.a6.v1	Glyma.13G120700.Wm82.a6.v1	2e-07
1869- 2:	Glyma.03G160466.Wm82.a6.v1	Glyma.13G120750.Wm82.a6.v1	7e-14
1869- 3:	Glyma.03G160700.Wm82.a6.v1	Glyma.13G120900.Wm82.a6.v1	2e-54
1869- 4:	Glyma.03G161000.Wm82.a6.v1	Glyma.13G121100.Wm82.a6.v1	3e-81
1869- 5:	Glyma.03G161400.Wm82.a6.v1	Glyma.13G121301.Wm82.a6.v1	3e-106
1869- 6:	Glyma.03G161600.Wm82.a6.v1	Glyma.13G121600.Wm82.a6.v1	9e-90
1869- 7:	Glyma.03G162100.Wm82.a6.v1	Glyma.13G122200.Wm82.a6.v1	0
1869- 8:	Glyma.03G162300.Wm82.a6.v1	Glyma.13G122400.Wm82.a6.v1	2e-32
1869- 9:	Glyma.03G162400.Wm82.a6.v1	Glyma.13G122500.Wm82.a6.v1	2e-33
1869- 10:	Glyma.03G163000.Wm82.a6.v1	Glyma.13G123400.Wm82.a6.v1	0
1869- 11:	Glyma.03G163467.Wm82.a6.v1	Glyma.13G123500.Wm82.a6.v1	2e-124
1869- 12:	Glyma.03G163750.Wm82.a6.v1	Glyma.13G124000.Wm82.a6.v1	1e-57
1869- 13:	Glyma.03G164000.Wm82.a6.v1	Glyma.13G124341.Wm82.a6.v1	9e-88
1869- 14:	Glyma.03G164200.Wm82.a6.v1	Glyma.13G124381.Wm82.a6.v1	4e-163
1869- 15:	Glyma.03G164300.Wm82.a6.v1	Glyma.13G124400.Wm82.a6.v1	0
1869- 16:	Glyma.03G164600.Wm82.a6.v1	Glyma.13G124800.Wm82.a6.v1	0
1869- 17:	Glyma.03G164700.Wm82.a6.v1	Glyma.13G125000.Wm82.a6.v1	0
1869- 18:	Glyma.03G164900.Wm82.a6.v1	Glyma.13G125300.Wm82.a6.v1	1e-17
1869- 19:	Glyma.03G165300.Wm82.a6.v1	Glyma.13G125500.Wm82.a6.v1	2e-29
1869- 20:	Glyma.03G165400.Wm82.a6.v1	Glyma.13G125600.Wm82.a6.v1	0
1869- 21:	Glyma.03G166000.Wm82.a6.v1	Glyma.13G125901.Wm82.a6.v1	1e-88
1869- 22:	Glyma.03G166400.Wm82.a6.v1	Glyma.13G126200.Wm82.a6.v1	0
1869- 23:	Glyma.03G166600.Wm82.a6.v1	Glyma.13G126300.Wm82.a6.v1	1e-16
1869- 24:	Glyma.03G166700.Wm82.a6.v1	Glyma.13G126400.Wm82.a6.v1	2e-99
1869- 25:	Glyma.03G166800.Wm82.a6.v1	Glyma.13G126600.Wm82.a6.v1	0
1869- 26:	Glyma.03G166900.Wm82.a6.v1	Glyma.13G126700.Wm82.a6.v1	2e-127
1869- 27:	Glyma.03G167400.Wm82.a6.v1	Glyma.13G127000.Wm82.a6.v1	1e-89
1869- 28:	Glyma.03G167500.Wm82.a6.v1	Glyma.13G127100.Wm82.a6.v1	0
1869- 29:	Glyma.03G167650.Wm82.a6.v1	Glyma.13G127300.Wm82.a6.v1	0
1869- 30:	Glyma.03G167800.Wm82.a6.v1	Glyma.13G127500.Wm82.a6.v1	0
1869- 31:	Glyma.03G168500.Wm82.a6.v1	Glyma.13G127600.Wm82.a6.v1	2e-116
1869- 32:	Glyma.03G168700.Wm82.a6.v1	Glyma.13G127900.Wm82.a6.v1	9e-63
1869- 33:	Glyma.03G168900.Wm82.a6.v1	Glyma.13G128100.Wm82.a6.v1	1e-67
1869- 34:	Glyma.03G169200.Wm82.a6.v1	Glyma.13G128200.Wm82.a6.v1	0
1869- 35:	Glyma.03G169300.Wm82.a6.v1	Glyma.13G128300.Wm82.a6.v1	2e-177
1869- 36:	Glyma.03G169500.Wm82.a6.v1	Glyma.13G128700.Wm82.a6.v1	0
1869- 37:	Glyma.03G169600.Wm82.a6.v1	Glyma.13G128800.Wm82.a6.v1	0
1869- 38:	Glyma.03G169700.Wm82.a6.v1	Glyma.13G129700.Wm82.a6.v1	0
1869- 39:	Glyma.03G170000.Wm82.a6.v1	Glyma.13G130000.Wm82.a6.v1	0
1869- 40:	Glyma.03G170300.Wm82.a6.v1	Glyma.13G130100.Wm82.a6.v1	3e-173
1869- 41:	Glyma.03G170400.Wm82.a6.v1	Glyma.13G130300.Wm82.a6.v1	5e-96
1869- 42:	Glyma.03G170600.Wm82.a6.v1	Glyma.13G130400.Wm82.a6.v1	0
1869- 43:	Glyma.03G170800.Wm82.a6.v1	Glyma.13G130600.Wm82.a6.v1	2e-07
1869- 44:	Glyma.03G171000.Wm82.a6.v1	Glyma.13G130700.Wm82.a6.v1	0
1869- 45:	Glyma.03G171100.Wm82.a6.v1	Glyma.13G130900.Wm82.a6.v1	0
1869- 46:	Glyma.03G171500.Wm82.a6.v1	Glyma.13G131200.Wm82.a6.v1	0
1869- 47:	Glyma.03G171800.Wm82.a6.v1	Glyma.13G131300.Wm82.a6.v1	0
1869- 48:	Glyma.03G171900.Wm82.a6.v1	Glyma.13G131400.Wm82.a6.v1	0
1869- 49:	Glyma.03G172000.Wm82.a6.v1	Glyma.13G131500.Wm82.a6.v1	2e-38
1869- 50:	Glyma.03G172400.Wm82.a6.v1	Glyma.13G132002.Wm82.a6.v1	2e-30
1869- 51:	Glyma.03G172500.Wm82.a6.v1	Glyma.13G132100.Wm82.a6.v1	6e-92
1869- 52:	Glyma.03G172700.Wm82.a6.v1	Glyma.13G132400.Wm82.a6.v1	6e-137
1869- 53:	Glyma.03G172900.Wm82.a6.v1	Glyma.13G132500.Wm82.a6.v1	0
1869- 54:	Glyma.03G173000.Wm82.a6.v1	Glyma.13G132700.Wm82.a6.v1	0
1869- 55:	Glyma.03G173100.Wm82.a6.v1	Glyma.13G132800.Wm82.a6.v1	4e-52
1869- 56:	Glyma.03G173700.Wm82.a6.v1	Glyma.13G133300.Wm82.a6.v1	6e-46
1869- 57:	Glyma.03G173800.Wm82.a6.v1	Glyma.13G133400.Wm82.a6.v1	1e-95
1869- 58:	Glyma.03G173900.Wm82.a6.v1	Glyma.13G133500.Wm82.a6.v1	0
1869- 59:	Glyma.03G174100.Wm82.a6.v1	Glyma.13G133600.Wm82.a6.v1	7e-124
1869- 60:	Glyma.03G174300.Wm82.a6.v1	Glyma.13G134100.Wm82.a6.v1	0
1869- 61:	Glyma.03G174700.Wm82.a6.v1	Glyma.13G134300.Wm82.a6.v1	5e-75
1869- 62:	Glyma.03G174900.Wm82.a6.v1	Glyma.13G134500.Wm82.a6.v1	2e-107
1869- 63:	Glyma.03G175000.Wm82.a6.v1	Glyma.13G134600.Wm82.a6.v1	0
1869- 64:	Glyma.03G175100.Wm82.a6.v1	Glyma.13G134700.Wm82.a6.v1	4e-54
1869- 65:	Glyma.03G175700.Wm82.a6.v1	Glyma.13G134900.Wm82.a6.v1	8e-102
1869- 66:	Glyma.03G176000.Wm82.a6.v1	Glyma.13G135200.Wm82.a6.v1	6e-55
1869- 67:	Glyma.03G176100.Wm82.a6.v1	Glyma.13G135300.Wm82.a6.v1	0
1869- 68:	Glyma.03G176300.Wm82.a6.v1	Glyma.13G135500.Wm82.a6.v1	2e-129
1869- 69:	Glyma.03G176500.Wm82.a6.v1	Glyma.13G135800.Wm82.a6.v1	0
1869- 70:	Glyma.03G176800.Wm82.a6.v1	Glyma.13G136000.Wm82.a6.v1	3e-153
1869- 71:	Glyma.03G177100.Wm82.a6.v1	Glyma.13G136200.Wm82.a6.v1	0
1869- 72:	Glyma.03G177300.Wm82.a6.v1	Glyma.13G136300.Wm82.a6.v1	3e-107
1869- 73:	Glyma.03G177400.Wm82.a6.v1	Glyma.13G136400.Wm82.a6.v1	0
1869- 74:	Glyma.03G177600.Wm82.a6.v1	Glyma.13G136700.Wm82.a6.v1	0
1869- 75:	Glyma.03G178000.Wm82.a6.v1	Glyma.13G137100.Wm82.a6.v1	1e-101
1869- 76:	Glyma.03G178100.Wm82.a6.v1	Glyma.13G137200.Wm82.a6.v1	0
1869- 77:	Glyma.03G178200.Wm82.a6.v1	Glyma.13G137500.Wm82.a6.v1	0
1869- 78:	Glyma.03G178300.Wm82.a6.v1	Glyma.13G137600.Wm82.a6.v1	8e-169
1869- 79:	Glyma.03G178700.Wm82.a6.v1	Glyma.13G138000.Wm82.a6.v1	7e-56
1869- 80:	Glyma.03G179000.Wm82.a6.v1	Glyma.13G138200.Wm82.a6.v1	1e-25
1869- 81:	Glyma.03G179300.Wm82.a6.v1	Glyma.13G138700.Wm82.a6.v1	0
1869- 82:	Glyma.03G179500.Wm82.a6.v1	Glyma.13G138900.Wm82.a6.v1	4e-165
1869- 83:	Glyma.03G179700.Wm82.a6.v1	Glyma.13G139000.Wm82.a6.v1	0
1869- 84:	Glyma.03G180100.Wm82.a6.v1	Glyma.13G139100.Wm82.a6.v1	0
1869- 85:	Glyma.03G180200.Wm82.a6.v1	Glyma.13G139200.Wm82.a6.v1	0
1869- 86:	Glyma.03G180300.Wm82.a6.v1	Glyma.13G139300.Wm82.a6.v1	1e-170
1869- 87:	Glyma.03G180500.Wm82.a6.v1	Glyma.13G139400.Wm82.a6.v1	9e-149
1869- 88:	Glyma.03G180600.Wm82.a6.v1	Glyma.13G139500.Wm82.a6.v1	0
1869- 89:	Glyma.03G180700.Wm82.a6.v1	Glyma.13G139900.Wm82.a6.v1	3e-60
1869- 90:	Glyma.03G180950.Wm82.a6.v1	Glyma.13G140000.Wm82.a6.v1	6e-07
1869- 91:	Glyma.03G181100.Wm82.a6.v1	Glyma.13G140200.Wm82.a6.v1	1e-39
1869- 92:	Glyma.03G181200.Wm82.a6.v1	Glyma.13G140700.Wm82.a6.v1	0
1869- 93:	Glyma.03G181300.Wm82.a6.v1	Glyma.13G140900.Wm82.a6.v1	1e-155
1869- 94:	Glyma.03G182100.Wm82.a6.v1	Glyma.13G142700.Wm82.a6.v1	7e-10
1869- 95:	Glyma.03G182900.Wm82.a6.v1	Glyma.13G143500.Wm82.a6.v1	4e-60
1869- 96:	Glyma.03G183600.Wm82.a6.v1	Glyma.13G144500.Wm82.a6.v1	4e-09
1869- 97:	Glyma.03G184800.Wm82.a6.v1	Glyma.13G145400.Wm82.a6.v1	0
1869- 98:	Glyma.03G184900.Wm82.a6.v1	Glyma.13G145500.Wm82.a6.v1	0
1869- 99:	Glyma.03G185100.Wm82.a6.v1	Glyma.13G145600.Wm82.a6.v1	0
1869-100:	Glyma.03G185200.Wm82.a6.v1	Glyma.13G145700.Wm82.a6.v1	0
1869-101:	Glyma.03G185400.Wm82.a6.v1	Glyma.13G145900.Wm82.a6.v1	0
1869-102:	Glyma.03G185500.Wm82.a6.v1	Glyma.13G146100.Wm82.a6.v1	6e-98
1869-103:	Glyma.03G185800.Wm82.a6.v1	Glyma.13G146200.Wm82.a6.v1	0
1869-104:	Glyma.03G185900.Wm82.a6.v1	Glyma.13G146300.Wm82.a6.v1	2e-117
1869-105:	Glyma.03G186100.Wm82.a6.v1	Glyma.13G146400.Wm82.a6.v1	7e-76
1869-106:	Glyma.03G186200.Wm82.a6.v1	Glyma.13G146600.Wm82.a6.v1	3e-127
1869-107:	Glyma.03G186300.Wm82.a6.v1	Glyma.13G146700.Wm82.a6.v1	0
1869-108:	Glyma.03G187900.Wm82.a6.v1	Glyma.13G147600.Wm82.a6.v1	0
1869-109:	Glyma.03G188000.Wm82.a6.v1	Glyma.13G147800.Wm82.a6.v1	4e-124
1869-110:	Glyma.03G188100.Wm82.a6.v1	Glyma.13G147900.Wm82.a6.v1	9e-92
1869-111:	Glyma.03G188400.Wm82.a6.v1	Glyma.13G148100.Wm82.a6.v1	0
1869-112:	Glyma.03G188500.Wm82.a6.v1	Glyma.13G148200.Wm82.a6.v1	0
1869-113:	Glyma.03G188600.Wm82.a6.v1	Glyma.13G148300.Wm82.a6.v1	0
1869-114:	Glyma.03G188800.Wm82.a6.v1	Glyma.13G148500.Wm82.a6.v1	5e-132
1869-115:	Glyma.03G189100.Wm82.a6.v1	Glyma.13G148700.Wm82.a6.v1	0
1869-116:	Glyma.03G189200.Wm82.a6.v1	Glyma.13G149000.Wm82.a6.v1	6e-40
1869-117:	Glyma.03G189400.Wm82.a6.v1	Glyma.13G149500.Wm82.a6.v1	4e-88
1869-118:	Glyma.03G189500.Wm82.a6.v1	Glyma.13G149600.Wm82.a6.v1	0
1869-119:	Glyma.03G189600.Wm82.a6.v1	Glyma.13G149700.Wm82.a6.v1	2e-170
1869-120:	Glyma.03G189700.Wm82.a6.v1	Glyma.13G149800.Wm82.a6.v1	0
1869-121:	Glyma.03G189800.Wm82.a6.v1	Glyma.13G150000.Wm82.a6.v1	0
1869-122:	Glyma.03G190300.Wm82.a6.v1	Glyma.13G150300.Wm82.a6.v1	4e-16
1869-123:	Glyma.03G190800.Wm82.a6.v1	Glyma.13G151000.Wm82.a6.v1	0
1869-124:	Glyma.03G191000.Wm82.a6.v1	Glyma.13G151100.Wm82.a6.v1	0
1869-125:	Glyma.03G191100.Wm82.a6.v1	Glyma.13G151200.Wm82.a6.v1	8e-156
1869-126:	Glyma.03G191500.Wm82.a6.v1	Glyma.13G151800.Wm82.a6.v1	0
1869-127:	Glyma.03G191800.Wm82.a6.v1	Glyma.13G151900.Wm82.a6.v1	1e-69
1869-128:	Glyma.03G192000.Wm82.a6.v1	Glyma.13G152100.Wm82.a6.v1	1e-129
1869-129:	Glyma.03G192200.Wm82.a6.v1	Glyma.13G152116.Wm82.a6.v1	2e-106
1869-130:	Glyma.03G193000.Wm82.a6.v1	Glyma.13G152132.Wm82.a6.v1	0
1869-131:	Glyma.03G193100.Wm82.a6.v1	Glyma.13G152148.Wm82.a6.v1	3e-32
1869-132:	Glyma.03G193200.Wm82.a6.v1	Glyma.13G152168.Wm82.a6.v1	5e-94
1869-133:	Glyma.03G193500.Wm82.a6.v1	Glyma.13G152202.Wm82.a6.v1	0
1869-134:	Glyma.03G193700.Wm82.a6.v1	Glyma.13G152848.Wm82.a6.v1	1e-54
1869-135:	Glyma.03G194000.Wm82.a6.v1	Glyma.13G152916.Wm82.a6.v1	2e-73
1869-136:	Glyma.03G194300.Wm82.a6.v1	Glyma.13G153018.Wm82.a6.v1	9e-33
1869-137:	Glyma.03G194700.Wm82.a6.v1	Glyma.13G153086.Wm82.a6.v1	7e-105
1869-138:	Glyma.03G194800.Wm82.a6.v1	Glyma.13G153120.Wm82.a6.v1	0
1869-139:	Glyma.03G195200.Wm82.a6.v1	Glyma.13G153300.Wm82.a6.v1	0
1869-140:	Glyma.03G195300.Wm82.a6.v1	Glyma.13G153400.Wm82.a6.v1	8e-45
1869-141:	Glyma.03G195700.Wm82.a6.v1	Glyma.13G153500.Wm82.a6.v1	5e-41
1869-142:	Glyma.03G196300.Wm82.a6.v1	Glyma.13G153800.Wm82.a6.v1	3e-54
1869-143:	Glyma.03G196500.Wm82.a6.v1	Glyma.13G154300.Wm82.a6.v1	2e-91
1869-144:	Glyma.03G196600.Wm82.a6.v1	Glyma.13G154400.Wm82.a6.v1	0
## Alignment 2087: score=320.0 e_value=2.6e-06 N=7 Gm03&Gm20 minus
2087- 0:	Glyma.03G189900.Wm82.a6.v1	Glyma.20G189600.Wm82.a6.v1	3e-114
2087- 1:	Glyma.03G190000.Wm82.a6.v1	Glyma.20G189200.Wm82.a6.v1	5e-129
2087- 2:	Glyma.03G190200.Wm82.a6.v1	Glyma.20G188600.Wm82.a6.v1	0
2087- 3:	Glyma.03G190800.Wm82.a6.v1	Glyma.20G188300.Wm82.a6.v1	0
2087- 4:	Glyma.03G192100.Wm82.a6.v1	Glyma.20G187600.Wm82.a6.v1	1e-62
2087- 5:	Glyma.03G192600.Wm82.a6.v1	Glyma.20G187400.Wm82.a6.v1	0
2087- 6:	Glyma.03G193000.Wm82.a6.v1	Glyma.20G187200.Wm82.a6.v1	2e-131
## Alignment 5071: score=471.0 e_value=5.4e-15 N=12 Gm10&Gm10 plus
5071- 0:	Glyma.10G059700.Wm82.a6.v1	Glyma.10G197200.Wm82.a6.v1	8e-44
5071- 1:	Glyma.10G059900.Wm82.a6.v1	Glyma.10G197400.Wm82.a6.v1	2e-105
5071- 2:	Glyma.10G062800.Wm82.a6.v1	Glyma.10G198700.Wm82.a6.v1	1e-66
5071- 3:	Glyma.10G062900.Wm82.a6.v1	Glyma.10G200800.Wm82.a6.v1	6e-22
5071- 4:	Glyma.10G065000.Wm82.a6.v1	Glyma.10G201100.Wm82.a6.v1	0
5071- 5:	Glyma.10G065100.Wm82.a6.v1	Glyma.10G201400.Wm82.a6.v1	0
5071- 6:	Glyma.10G065600.Wm82.a6.v1	Glyma.10G201700.Wm82.a6.v1	0
5071- 7:	Glyma.10G065900.Wm82.a6.v1	Glyma.10G202150.Wm82.a6.v1	0
5071- 8:	Glyma.10G066800.Wm82.a6.v1	Glyma.10G202300.Wm82.a6.v1	2e-95
5071- 9:	Glyma.10G067400.Wm82.a6.v1	Glyma.10G203100.Wm82.a6.v1	4e-128
5071- 10:	Glyma.10G070500.Wm82.a6.v1	Glyma.10G203301.Wm82.a6.v1	1e-103
5071- 11:	Glyma.10G073800.Wm82.a6.v1	Glyma.10G205600.Wm82.a6.v1	2e-11
## Alignment 5168: score=13430.0 e_value=0 N=272 Gm10&Gm13 plus
5168- 0:	Glyma.10G031800.Wm82.a6.v1	Glyma.13G117100.Wm82.a6.v1	4e-26
5168- 1:	Glyma.10G032900.Wm82.a6.v1	Glyma.13G117600.Wm82.a6.v1	9e-17
5168- 2:	Glyma.10G034000.Wm82.a6.v1	Glyma.13G120200.Wm82.a6.v1	0
5168- 3:	Glyma.10G034100.Wm82.a6.v1	Glyma.13G120300.Wm82.a6.v1	0
5168- 4:	Glyma.10G034200.Wm82.a6.v1	Glyma.13G120400.Wm82.a6.v1	0
5168- 5:	Glyma.10G034300.Wm82.a6.v1	Glyma.13G120700.Wm82.a6.v1	0
5168- 6:	Glyma.10G034351.Wm82.a6.v1	Glyma.13G120750.Wm82.a6.v1	5e-07
5168- 7:	Glyma.10G034400.Wm82.a6.v1	Glyma.13G120800.Wm82.a6.v1	0
5168- 8:	Glyma.10G034600.Wm82.a6.v1	Glyma.13G120900.Wm82.a6.v1	6e-110
5168- 9:	Glyma.10G034800.Wm82.a6.v1	Glyma.13G121100.Wm82.a6.v1	1e-87
5168- 10:	Glyma.10G034900.Wm82.a6.v1	Glyma.13G121201.Wm82.a6.v1	7e-25
5168- 11:	Glyma.10G035000.Wm82.a6.v1	Glyma.13G121301.Wm82.a6.v1	2e-118
5168- 12:	Glyma.10G035200.Wm82.a6.v1	Glyma.13G121500.Wm82.a6.v1	0
5168- 13:	Glyma.10G035300.Wm82.a6.v1	Glyma.13G121600.Wm82.a6.v1	8e-108
5168- 14:	Glyma.10G035600.Wm82.a6.v1	Glyma.13G122000.Wm82.a6.v1	2e-152
5168- 15:	Glyma.10G035700.Wm82.a6.v1	Glyma.13G122100.Wm82.a6.v1	0
5168- 16:	Glyma.10G035800.Wm82.a6.v1	Glyma.13G122200.Wm82.a6.v1	0
5168- 17:	Glyma.10G035900.Wm82.a6.v1	Glyma.13G122300.Wm82.a6.v1	0
5168- 18:	Glyma.10G036000.Wm82.a6.v1	Glyma.13G122400.Wm82.a6.v1	0
5168- 19:	Glyma.10G036200.Wm82.a6.v1	Glyma.13G122500.Wm82.a6.v1	1e-95
5168- 20:	Glyma.10G036900.Wm82.a6.v1	Glyma.13G123300.Wm82.a6.v1	4e-105
5168- 21:	Glyma.10G037100.Wm82.a6.v1	Glyma.13G123500.Wm82.a6.v1	0
5168- 22:	Glyma.10G037200.Wm82.a6.v1	Glyma.13G123600.Wm82.a6.v1	0
5168- 23:	Glyma.10G037300.Wm82.a6.v1	Glyma.13G123700.Wm82.a6.v1	0
5168- 24:	Glyma.10G037400.Wm82.a6.v1	Glyma.13G124000.Wm82.a6.v1	0
5168- 25:	Glyma.10G037600.Wm82.a6.v1	Glyma.13G124341.Wm82.a6.v1	2e-142
5168- 26:	Glyma.10G037700.Wm82.a6.v1	Glyma.13G124381.Wm82.a6.v1	0
5168- 27:	Glyma.10G037900.Wm82.a6.v1	Glyma.13G124400.Wm82.a6.v1	0
5168- 28:	Glyma.10G038100.Wm82.a6.v1	Glyma.13G124500.Wm82.a6.v1	0
5168- 29:	Glyma.10G038200.Wm82.a6.v1	Glyma.13G124600.Wm82.a6.v1	2e-156
5168- 30:	Glyma.10G038400.Wm82.a6.v1	Glyma.13G124800.Wm82.a6.v1	0
5168- 31:	Glyma.10G038500.Wm82.a6.v1	Glyma.13G124900.Wm82.a6.v1	0
5168- 32:	Glyma.10G038600.Wm82.a6.v1	Glyma.13G125000.Wm82.a6.v1	0
5168- 33:	Glyma.10G038700.Wm82.a6.v1	Glyma.13G125100.Wm82.a6.v1	0
5168- 34:	Glyma.10G038800.Wm82.a6.v1	Glyma.13G125202.Wm82.a6.v1	0
5168- 35:	Glyma.10G038900.Wm82.a6.v1	Glyma.13G125300.Wm82.a6.v1	7e-81
5168- 36:	Glyma.10G039000.Wm82.a6.v1	Glyma.13G125400.Wm82.a6.v1	0
5168- 37:	Glyma.10G039100.Wm82.a6.v1	Glyma.13G125500.Wm82.a6.v1	8e-88
5168- 38:	Glyma.10G039200.Wm82.a6.v1	Glyma.13G125600.Wm82.a6.v1	0
5168- 39:	Glyma.10G039300.Wm82.a6.v1	Glyma.13G125700.Wm82.a6.v1	2e-151
5168- 40:	Glyma.10G039400.Wm82.a6.v1	Glyma.13G125800.Wm82.a6.v1	0
5168- 41:	Glyma.10G039500.Wm82.a6.v1	Glyma.13G125901.Wm82.a6.v1	0
5168- 42:	Glyma.10G039602.Wm82.a6.v1	Glyma.13G126000.Wm82.a6.v1	3e-56
5168- 43:	Glyma.10G039700.Wm82.a6.v1	Glyma.13G126200.Wm82.a6.v1	0
5168- 44:	Glyma.10G039800.Wm82.a6.v1	Glyma.13G126300.Wm82.a6.v1	4e-60
5168- 45:	Glyma.10G039900.Wm82.a6.v1	Glyma.13G126400.Wm82.a6.v1	2e-99
5168- 46:	Glyma.10G040000.Wm82.a6.v1	Glyma.13G126502.Wm82.a6.v1	1e-76
5168- 47:	Glyma.10G040100.Wm82.a6.v1	Glyma.13G126600.Wm82.a6.v1	0
5168- 48:	Glyma.10G040200.Wm82.a6.v1	Glyma.13G126900.Wm82.a6.v1	4e-63
5168- 49:	Glyma.10G040400.Wm82.a6.v1	Glyma.13G127000.Wm82.a6.v1	2e-153
5168- 50:	Glyma.10G040500.Wm82.a6.v1	Glyma.13G127100.Wm82.a6.v1	0
5168- 51:	Glyma.10G040600.Wm82.a6.v1	Glyma.13G127200.Wm82.a6.v1	7e-128
5168- 52:	Glyma.10G040700.Wm82.a6.v1	Glyma.13G127300.Wm82.a6.v1	0
5168- 53:	Glyma.10G040800.Wm82.a6.v1	Glyma.13G127700.Wm82.a6.v1	5e-46
5168- 54:	Glyma.10G040900.Wm82.a6.v1	Glyma.13G127800.Wm82.a6.v1	0
5168- 55:	Glyma.10G041000.Wm82.a6.v1	Glyma.13G127900.Wm82.a6.v1	3e-69
5168- 56:	Glyma.10G041100.Wm82.a6.v1	Glyma.13G128000.Wm82.a6.v1	0
5168- 57:	Glyma.10G041200.Wm82.a6.v1	Glyma.13G128100.Wm82.a6.v1	5e-70
5168- 58:	Glyma.10G041300.Wm82.a6.v1	Glyma.13G128200.Wm82.a6.v1	0
5168- 59:	Glyma.10G041400.Wm82.a6.v1	Glyma.13G128300.Wm82.a6.v1	0
5168- 60:	Glyma.10G041600.Wm82.a6.v1	Glyma.13G128600.Wm82.a6.v1	8e-53
5168- 61:	Glyma.10G041700.Wm82.a6.v1	Glyma.13G128700.Wm82.a6.v1	0
5168- 62:	Glyma.10G041800.Wm82.a6.v1	Glyma.13G128800.Wm82.a6.v1	0
5168- 63:	Glyma.10G041900.Wm82.a6.v1	Glyma.13G128900.Wm82.a6.v1	6e-89
5168- 64:	Glyma.10G041950.Wm82.a6.v1	Glyma.13G129351.Wm82.a6.v1	4e-15
5168- 65:	Glyma.10G042000.Wm82.a6.v1	Glyma.13G129400.Wm82.a6.v1	1e-86
5168- 66:	Glyma.10G042300.Wm82.a6.v1	Glyma.13G129700.Wm82.a6.v1	0
5168- 67:	Glyma.10G042400.Wm82.a6.v1	Glyma.13G129800.Wm82.a6.v1	8e-149
5168- 68:	Glyma.10G042500.Wm82.a6.v1	Glyma.13G129900.Wm82.a6.v1	0
5168- 69:	Glyma.10G042600.Wm82.a6.v1	Glyma.13G130000.Wm82.a6.v1	0
5168- 70:	Glyma.10G042800.Wm82.a6.v1	Glyma.13G130100.Wm82.a6.v1	0
5168- 71:	Glyma.10G042900.Wm82.a6.v1	Glyma.13G130200.Wm82.a6.v1	4e-85
5168- 72:	Glyma.10G042950.Wm82.a6.v1	Glyma.13G130300.Wm82.a6.v1	3e-174
5168- 73:	Glyma.10G043000.Wm82.a6.v1	Glyma.13G130400.Wm82.a6.v1	0
5168- 74:	Glyma.10G043100.Wm82.a6.v1	Glyma.13G130600.Wm82.a6.v1	1e-49
5168- 75:	Glyma.10G043200.Wm82.a6.v1	Glyma.13G130700.Wm82.a6.v1	0
5168- 76:	Glyma.10G043400.Wm82.a6.v1	Glyma.13G131100.Wm82.a6.v1	3e-146
5168- 77:	Glyma.10G043600.Wm82.a6.v1	Glyma.13G131300.Wm82.a6.v1	0
5168- 78:	Glyma.10G043700.Wm82.a6.v1	Glyma.13G131400.Wm82.a6.v1	0
5168- 79:	Glyma.10G043800.Wm82.a6.v1	Glyma.13G131500.Wm82.a6.v1	2e-70
5168- 80:	Glyma.10G043900.Wm82.a6.v1	Glyma.13G131600.Wm82.a6.v1	0
5168- 81:	Glyma.10G044000.Wm82.a6.v1	Glyma.13G131700.Wm82.a6.v1	3e-99
5168- 82:	Glyma.10G044200.Wm82.a6.v1	Glyma.13G131800.Wm82.a6.v1	0
5168- 83:	Glyma.10G044300.Wm82.a6.v1	Glyma.13G131900.Wm82.a6.v1	0
5168- 84:	Glyma.10G044400.Wm82.a6.v1	Glyma.13G132002.Wm82.a6.v1	4e-59
5168- 85:	Glyma.10G044600.Wm82.a6.v1	Glyma.13G132200.Wm82.a6.v1	2e-48
5168- 86:	Glyma.10G044700.Wm82.a6.v1	Glyma.13G132400.Wm82.a6.v1	1e-159
5168- 87:	Glyma.10G044800.Wm82.a6.v1	Glyma.13G132500.Wm82.a6.v1	0
5168- 88:	Glyma.10G045000.Wm82.a6.v1	Glyma.13G132600.Wm82.a6.v1	0
5168- 89:	Glyma.10G045100.Wm82.a6.v1	Glyma.13G132700.Wm82.a6.v1	0
5168- 90:	Glyma.10G045200.Wm82.a6.v1	Glyma.13G132800.Wm82.a6.v1	1e-74
5168- 91:	Glyma.10G045500.Wm82.a6.v1	Glyma.13G133200.Wm82.a6.v1	0
5168- 92:	Glyma.10G045600.Wm82.a6.v1	Glyma.13G133500.Wm82.a6.v1	0
5168- 93:	Glyma.10G045700.Wm82.a6.v1	Glyma.13G133600.Wm82.a6.v1	7e-176
5168- 94:	Glyma.10G045800.Wm82.a6.v1	Glyma.13G133800.Wm82.a6.v1	0
5168- 95:	Glyma.10G045900.Wm82.a6.v1	Glyma.13G133900.Wm82.a6.v1	9e-81
5168- 96:	Glyma.10G046000.Wm82.a6.v1	Glyma.13G134100.Wm82.a6.v1	0
5168- 97:	Glyma.10G046100.Wm82.a6.v1	Glyma.13G134200.Wm82.a6.v1	0
5168- 98:	Glyma.10G046200.Wm82.a6.v1	Glyma.13G134300.Wm82.a6.v1	0
5168- 99:	Glyma.10G046300.Wm82.a6.v1	Glyma.13G134400.Wm82.a6.v1	0
5168-100:	Glyma.10G046400.Wm82.a6.v1	Glyma.13G134500.Wm82.a6.v1	0
5168-101:	Glyma.10G046500.Wm82.a6.v1	Glyma.13G134600.Wm82.a6.v1	5e-173
5168-102:	Glyma.10G046800.Wm82.a6.v1	Glyma.13G134700.Wm82.a6.v1	2e-91
5168-103:	Glyma.10G046900.Wm82.a6.v1	Glyma.13G134900.Wm82.a6.v1	9e-146
5168-104:	Glyma.10G047150.Wm82.a6.v1	Glyma.13G135000.Wm82.a6.v1	2e-100
5168-105:	Glyma.10G047200.Wm82.a6.v1	Glyma.13G135100.Wm82.a6.v1	1e-154
5168-106:	Glyma.10G047400.Wm82.a6.v1	Glyma.13G135200.Wm82.a6.v1	6e-173
5168-107:	Glyma.10G047500.Wm82.a6.v1	Glyma.13G135300.Wm82.a6.v1	0
5168-108:	Glyma.10G047600.Wm82.a6.v1	Glyma.13G135400.Wm82.a6.v1	0
5168-109:	Glyma.10G047700.Wm82.a6.v1	Glyma.13G135500.Wm82.a6.v1	2e-168
5168-110:	Glyma.10G047800.Wm82.a6.v1	Glyma.13G135700.Wm82.a6.v1	2e-63
5168-111:	Glyma.10G047900.Wm82.a6.v1	Glyma.13G135800.Wm82.a6.v1	0
5168-112:	Glyma.10G048100.Wm82.a6.v1	Glyma.13G135900.Wm82.a6.v1	0
5168-113:	Glyma.10G048200.Wm82.a6.v1	Glyma.13G136000.Wm82.a6.v1	0
5168-114:	Glyma.10G048300.Wm82.a6.v1	Glyma.13G136100.Wm82.a6.v1	0
5168-115:	Glyma.10G048400.Wm82.a6.v1	Glyma.13G136200.Wm82.a6.v1	0
5168-116:	Glyma.10G048500.Wm82.a6.v1	Glyma.13G136300.Wm82.a6.v1	0
5168-117:	Glyma.10G048600.Wm82.a6.v1	Glyma.13G136400.Wm82.a6.v1	0
5168-118:	Glyma.10G048700.Wm82.a6.v1	Glyma.13G136500.Wm82.a6.v1	0
5168-119:	Glyma.10G048800.Wm82.a6.v1	Glyma.13G136700.Wm82.a6.v1	0
5168-120:	Glyma.10G049100.Wm82.a6.v1	Glyma.13G136900.Wm82.a6.v1	0
5168-121:	Glyma.10G049300.Wm82.a6.v1	Glyma.13G137000.Wm82.a6.v1	0
5168-122:	Glyma.10G049400.Wm82.a6.v1	Glyma.13G137100.Wm82.a6.v1	1e-101
5168-123:	Glyma.10G049600.Wm82.a6.v1	Glyma.13G137200.Wm82.a6.v1	0
5168-124:	Glyma.10G049800.Wm82.a6.v1	Glyma.13G137300.Wm82.a6.v1	0
5168-125:	Glyma.10G049900.Wm82.a6.v1	Glyma.13G137400.Wm82.a6.v1	2e-76
5168-126:	Glyma.10G050000.Wm82.a6.v1	Glyma.13G137500.Wm82.a6.v1	0
5168-127:	Glyma.10G050100.Wm82.a6.v1	Glyma.13G137600.Wm82.a6.v1	0
5168-128:	Glyma.10G050200.Wm82.a6.v1	Glyma.13G137700.Wm82.a6.v1	4e-113
5168-129:	Glyma.10G050300.Wm82.a6.v1	Glyma.13G137800.Wm82.a6.v1	1e-158
5168-130:	Glyma.10G050400.Wm82.a6.v1	Glyma.13G137900.Wm82.a6.v1	0
5168-131:	Glyma.10G050500.Wm82.a6.v1	Glyma.13G138000.Wm82.a6.v1	0
5168-132:	Glyma.10G050600.Wm82.a6.v1	Glyma.13G138100.Wm82.a6.v1	7e-50
5168-133:	Glyma.10G050700.Wm82.a6.v1	Glyma.13G138200.Wm82.a6.v1	9e-30
5168-134:	Glyma.10G050800.Wm82.a6.v1	Glyma.13G138300.Wm82.a6.v1	0
5168-135:	Glyma.10G050901.Wm82.a6.v1	Glyma.13G138400.Wm82.a6.v1	2e-26
5168-136:	Glyma.10G051000.Wm82.a6.v1	Glyma.13G138500.Wm82.a6.v1	1e-45
5168-137:	Glyma.10G051100.Wm82.a6.v1	Glyma.13G138600.Wm82.a6.v1	8e-165
5168-138:	Glyma.10G051200.Wm82.a6.v1	Glyma.13G138700.Wm82.a6.v1	0
5168-139:	Glyma.10G051400.Wm82.a6.v1	Glyma.13G138900.Wm82.a6.v1	0
5168-140:	Glyma.10G051500.Wm82.a6.v1	Glyma.13G139000.Wm82.a6.v1	0
5168-141:	Glyma.10G051600.Wm82.a6.v1	Glyma.13G139100.Wm82.a6.v1	0
5168-142:	Glyma.10G051800.Wm82.a6.v1	Glyma.13G139200.Wm82.a6.v1	0
5168-143:	Glyma.10G051900.Wm82.a6.v1	Glyma.13G139300.Wm82.a6.v1	0
5168-144:	Glyma.10G052000.Wm82.a6.v1	Glyma.13G139400.Wm82.a6.v1	0
5168-145:	Glyma.10G052500.Wm82.a6.v1	Glyma.13G139500.Wm82.a6.v1	0
5168-146:	Glyma.10G052600.Wm82.a6.v1	Glyma.13G139800.Wm82.a6.v1	0
5168-147:	Glyma.10G052700.Wm82.a6.v1	Glyma.13G139900.Wm82.a6.v1	6e-72
5168-148:	Glyma.10G052851.Wm82.a6.v1	Glyma.13G140000.Wm82.a6.v1	3e-06
5168-149:	Glyma.10G053100.Wm82.a6.v1	Glyma.13G140100.Wm82.a6.v1	4e-116
5168-150:	Glyma.10G053200.Wm82.a6.v1	Glyma.13G140200.Wm82.a6.v1	1e-98
5168-151:	Glyma.10G053300.Wm82.a6.v1	Glyma.13G140300.Wm82.a6.v1	1e-79
5168-152:	Glyma.10G053500.Wm82.a6.v1	Glyma.13G140550.Wm82.a6.v1	0
5168-153:	Glyma.10G053700.Wm82.a6.v1	Glyma.13G140800.Wm82.a6.v1	0
5168-154:	Glyma.10G053800.Wm82.a6.v1	Glyma.13G140900.Wm82.a6.v1	3e-164
5168-155:	Glyma.10G053900.Wm82.a6.v1	Glyma.13G141000.Wm82.a6.v1	0
5168-156:	Glyma.10G054000.Wm82.a6.v1	Glyma.13G141100.Wm82.a6.v1	8e-51
5168-157:	Glyma.10G054200.Wm82.a6.v1	Glyma.13G141200.Wm82.a6.v1	0
5168-158:	Glyma.10G054300.Wm82.a6.v1	Glyma.13G141400.Wm82.a6.v1	6e-101
5168-159:	Glyma.10G054400.Wm82.a6.v1	Glyma.13G141500.Wm82.a6.v1	0
5168-160:	Glyma.10G054500.Wm82.a6.v1	Glyma.13G141600.Wm82.a6.v1	0
5168-161:	Glyma.10G054600.Wm82.a6.v1	Glyma.13G141800.Wm82.a6.v1	0
5168-162:	Glyma.10G054700.Wm82.a6.v1	Glyma.13G141900.Wm82.a6.v1	0
5168-163:	Glyma.10G054900.Wm82.a6.v1	Glyma.13G142000.Wm82.a6.v1	5e-158
5168-164:	Glyma.10G055000.Wm82.a6.v1	Glyma.13G142100.Wm82.a6.v1	0
5168-165:	Glyma.10G055100.Wm82.a6.v1	Glyma.13G142200.Wm82.a6.v1	0
5168-166:	Glyma.10G055200.Wm82.a6.v1	Glyma.13G142300.Wm82.a6.v1	2e-83
5168-167:	Glyma.10G055300.Wm82.a6.v1	Glyma.13G142400.Wm82.a6.v1	0
5168-168:	Glyma.10G055600.Wm82.a6.v1	Glyma.13G142700.Wm82.a6.v1	1e-57
5168-169:	Glyma.10G056800.Wm82.a6.v1	Glyma.13G143300.Wm82.a6.v1	3e-71
5168-170:	Glyma.10G056900.Wm82.a6.v1	Glyma.13G143400.Wm82.a6.v1	0
5168-171:	Glyma.10G057000.Wm82.a6.v1	Glyma.13G143500.Wm82.a6.v1	4e-73
5168-172:	Glyma.10G057100.Wm82.a6.v1	Glyma.13G143600.Wm82.a6.v1	0
5168-173:	Glyma.10G057200.Wm82.a6.v1	Glyma.13G143700.Wm82.a6.v1	1e-34
5168-174:	Glyma.10G057300.Wm82.a6.v1	Glyma.13G144000.Wm82.a6.v1	0
5168-175:	Glyma.10G057400.Wm82.a6.v1	Glyma.13G144100.Wm82.a6.v1	2e-119
5168-176:	Glyma.10G057500.Wm82.a6.v1	Glyma.13G144300.Wm82.a6.v1	0
5168-177:	Glyma.10G057600.Wm82.a6.v1	Glyma.13G144400.Wm82.a6.v1	0
5168-178:	Glyma.10G057700.Wm82.a6.v1	Glyma.13G144500.Wm82.a6.v1	0
5168-179:	Glyma.10G057800.Wm82.a6.v1	Glyma.13G144600.Wm82.a6.v1	0
5168-180:	Glyma.10G057900.Wm82.a6.v1	Glyma.13G144700.Wm82.a6.v1	3e-88
5168-181:	Glyma.10G058000.Wm82.a6.v1	Glyma.13G144800.Wm82.a6.v1	0
5168-182:	Glyma.10G058100.Wm82.a6.v1	Glyma.13G144900.Wm82.a6.v1	0
5168-183:	Glyma.10G058200.Wm82.a6.v1	Glyma.13G145000.Wm82.a6.v1	0
5168-184:	Glyma.10G058300.Wm82.a6.v1	Glyma.13G145100.Wm82.a6.v1	0
5168-185:	Glyma.10G058500.Wm82.a6.v1	Glyma.13G145200.Wm82.a6.v1	8e-164
5168-186:	Glyma.10G058600.Wm82.a6.v1	Glyma.13G145400.Wm82.a6.v1	0
5168-187:	Glyma.10G058702.Wm82.a6.v1	Glyma.13G145500.Wm82.a6.v1	3e-62
5168-188:	Glyma.10G058800.Wm82.a6.v1	Glyma.13G145600.Wm82.a6.v1	0
5168-189:	Glyma.10G058900.Wm82.a6.v1	Glyma.13G145700.Wm82.a6.v1	0
5168-190:	Glyma.10G059000.Wm82.a6.v1	Glyma.13G145800.Wm82.a6.v1	2e-140
5168-191:	Glyma.10G059101.Wm82.a6.v1	Glyma.13G145900.Wm82.a6.v1	1e-45
5168-192:	Glyma.10G059200.Wm82.a6.v1	Glyma.13G146100.Wm82.a6.v1	0
5168-193:	Glyma.10G059500.Wm82.a6.v1	Glyma.13G146200.Wm82.a6.v1	0
5168-194:	Glyma.10G059601.Wm82.a6.v1	Glyma.13G146300.Wm82.a6.v1	8e-43
5168-195:	Glyma.10G059700.Wm82.a6.v1	Glyma.13G146400.Wm82.a6.v1	2e-152
5168-196:	Glyma.10G059800.Wm82.a6.v1	Glyma.13G146500.Wm82.a6.v1	1e-129
5168-197:	Glyma.10G059900.Wm82.a6.v1	Glyma.13G146600.Wm82.a6.v1	5e-152
5168-198:	Glyma.10G060000.Wm82.a6.v1	Glyma.13G146700.Wm82.a6.v1	0
5168-199:	Glyma.10G060100.Wm82.a6.v1	Glyma.13G146751.Wm82.a6.v1	2e-50
5168-200:	Glyma.10G062700.Wm82.a6.v1	Glyma.13G147100.Wm82.a6.v1	0
5168-201:	Glyma.10G062800.Wm82.a6.v1	Glyma.13G147300.Wm82.a6.v1	0
5168-202:	Glyma.10G062900.Wm82.a6.v1	Glyma.13G147500.Wm82.a6.v1	0
5168-203:	Glyma.10G063000.Wm82.a6.v1	Glyma.13G147600.Wm82.a6.v1	0
5168-204:	Glyma.10G063100.Wm82.a6.v1	Glyma.13G147700.Wm82.a6.v1	0
5168-205:	Glyma.10G063200.Wm82.a6.v1	Glyma.13G147800.Wm82.a6.v1	3e-154
5168-206:	Glyma.10G063400.Wm82.a6.v1	Glyma.13G147900.Wm82.a6.v1	1e-125
5168-207:	Glyma.10G063500.Wm82.a6.v1	Glyma.13G148000.Wm82.a6.v1	1e-134
5168-208:	Glyma.10G063600.Wm82.a6.v1	Glyma.13G148100.Wm82.a6.v1	0
5168-209:	Glyma.10G063700.Wm82.a6.v1	Glyma.13G148200.Wm82.a6.v1	0
5168-210:	Glyma.10G063800.Wm82.a6.v1	Glyma.13G148400.Wm82.a6.v1	8e-169
5168-211:	Glyma.10G063900.Wm82.a6.v1	Glyma.13G148500.Wm82.a6.v1	0
5168-212:	Glyma.10G064000.Wm82.a6.v1	Glyma.13G148600.Wm82.a6.v1	0
5168-213:	Glyma.10G064200.Wm82.a6.v1	Glyma.13G148700.Wm82.a6.v1	0
5168-214:	Glyma.10G064400.Wm82.a6.v1	Glyma.13G149000.Wm82.a6.v1	0
5168-215:	Glyma.10G064500.Wm82.a6.v1	Glyma.13G149100.Wm82.a6.v1	0
5168-216:	Glyma.10G064600.Wm82.a6.v1	Glyma.13G149200.Wm82.a6.v1	0
5168-217:	Glyma.10G064700.Wm82.a6.v1	Glyma.13G149500.Wm82.a6.v1	1e-148
5168-218:	Glyma.10G064800.Wm82.a6.v1	Glyma.13G149600.Wm82.a6.v1	0
5168-219:	Glyma.10G064900.Wm82.a6.v1	Glyma.13G149700.Wm82.a6.v1	0
5168-220:	Glyma.10G065000.Wm82.a6.v1	Glyma.13G149800.Wm82.a6.v1	0
5168-221:	Glyma.10G065100.Wm82.a6.v1	Glyma.13G149900.Wm82.a6.v1	0
5168-222:	Glyma.10G065200.Wm82.a6.v1	Glyma.13G150000.Wm82.a6.v1	0
5168-223:	Glyma.10G065300.Wm82.a6.v1	Glyma.13G150200.Wm82.a6.v1	2e-56
5168-224:	Glyma.10G065500.Wm82.a6.v1	Glyma.13G150600.Wm82.a6.v1	0
5168-225:	Glyma.10G065600.Wm82.a6.v1	Glyma.13G150700.Wm82.a6.v1	0
5168-226:	Glyma.10G065702.Wm82.a6.v1	Glyma.13G150900.Wm82.a6.v1	1e-91
5168-227:	Glyma.10G065900.Wm82.a6.v1	Glyma.13G151000.Wm82.a6.v1	0
5168-228:	Glyma.10G066000.Wm82.a6.v1	Glyma.13G151100.Wm82.a6.v1	0
5168-229:	Glyma.10G066100.Wm82.a6.v1	Glyma.13G151200.Wm82.a6.v1	0
5168-230:	Glyma.10G066200.Wm82.a6.v1	Glyma.13G151300.Wm82.a6.v1	0
5168-231:	Glyma.10G066400.Wm82.a6.v1	Glyma.13G151500.Wm82.a6.v1	2e-38
5168-232:	Glyma.10G066500.Wm82.a6.v1	Glyma.13G151600.Wm82.a6.v1	3e-87
5168-233:	Glyma.10G066700.Wm82.a6.v1	Glyma.13G151800.Wm82.a6.v1	0
5168-234:	Glyma.10G066900.Wm82.a6.v1	Glyma.13G151900.Wm82.a6.v1	3e-116
5168-235:	Glyma.10G067100.Wm82.a6.v1	Glyma.13G152100.Wm82.a6.v1	0
5168-236:	Glyma.10G067200.Wm82.a6.v1	Glyma.13G152116.Wm82.a6.v1	0
5168-237:	Glyma.10G067400.Wm82.a6.v1	Glyma.13G152132.Wm82.a6.v1	0
5168-238:	Glyma.10G067500.Wm82.a6.v1	Glyma.13G152140.Wm82.a6.v1	0
5168-239:	Glyma.10G067800.Wm82.a6.v1	Glyma.13G152148.Wm82.a6.v1	2e-41
5168-240:	Glyma.10G067900.Wm82.a6.v1	Glyma.13G152168.Wm82.a6.v1	0
5168-241:	Glyma.10G068900.Wm82.a6.v1	Glyma.13G152236.Wm82.a6.v1	0
5168-242:	Glyma.10G069000.Wm82.a6.v1	Glyma.13G152270.Wm82.a6.v1	2e-64
5168-243:	Glyma.10G069100.Wm82.a6.v1	Glyma.13G152304.Wm82.a6.v1	0
5168-244:	Glyma.10G069200.Wm82.a6.v1	Glyma.13G152338.Wm82.a6.v1	1e-40
5168-245:	Glyma.10G069300.Wm82.a6.v1	Glyma.13G152372.Wm82.a6.v1	3e-110
5168-246:	Glyma.10G069400.Wm82.a6.v1	Glyma.13G152406.Wm82.a6.v1	0
5168-247:	Glyma.10G069500.Wm82.a6.v1	Glyma.13G152542.Wm82.a6.v1	0
5168-248:	Glyma.10G069600.Wm82.a6.v1	Glyma.13G152610.Wm82.a6.v1	2e-157
5168-249:	Glyma.10G069700.Wm82.a6.v1	Glyma.13G152644.Wm82.a6.v1	0
5168-250:	Glyma.10G069800.Wm82.a6.v1	Glyma.13G152678.Wm82.a6.v1	0
5168-251:	Glyma.10G070100.Wm82.a6.v1	Glyma.13G152746.Wm82.a6.v1	0
5168-252:	Glyma.10G070600.Wm82.a6.v1	Glyma.13G152848.Wm82.a6.v1	1e-71
5168-253:	Glyma.10G070700.Wm82.a6.v1	Glyma.13G152882.Wm82.a6.v1	0
5168-254:	Glyma.10G070900.Wm82.a6.v1	Glyma.13G152916.Wm82.a6.v1	7e-92
5168-255:	Glyma.10G071100.Wm82.a6.v1	Glyma.13G153018.Wm82.a6.v1	2e-42
5168-256:	Glyma.10G071200.Wm82.a6.v1	Glyma.13G153052.Wm82.a6.v1	0
5168-257:	Glyma.10G071400.Wm82.a6.v1	Glyma.13G153086.Wm82.a6.v1	1e-119
5168-258:	Glyma.10G071500.Wm82.a6.v1	Glyma.13G153120.Wm82.a6.v1	0
5168-259:	Glyma.10G071600.Wm82.a6.v1	Glyma.13G153154.Wm82.a6.v1	1e-153
5168-260:	Glyma.10G071700.Wm82.a6.v1	Glyma.13G153200.Wm82.a6.v1	0
5168-261:	Glyma.10G071800.Wm82.a6.v1	Glyma.13G153300.Wm82.a6.v1	0
5168-262:	Glyma.10G072000.Wm82.a6.v1	Glyma.13G153400.Wm82.a6.v1	2e-102
5168-263:	Glyma.10G072400.Wm82.a6.v1	Glyma.13G153800.Wm82.a6.v1	1e-91
5168-264:	Glyma.10G072701.Wm82.a6.v1	Glyma.13G153900.Wm82.a6.v1	6e-167
5168-265:	Glyma.10G073001.Wm82.a6.v1	Glyma.13G154000.Wm82.a6.v1	0
5168-266:	Glyma.10G073300.Wm82.a6.v1	Glyma.13G154200.Wm82.a6.v1	0
5168-267:	Glyma.10G073600.Wm82.a6.v1	Glyma.13G154300.Wm82.a6.v1	2e-156
5168-268:	Glyma.10G073700.Wm82.a6.v1	Glyma.13G154400.Wm82.a6.v1	0
5168-269:	Glyma.10G073800.Wm82.a6.v1	Glyma.13G154433.Wm82.a6.v1	1e-21
5168-270:	Glyma.10G074000.Wm82.a6.v1	Glyma.13G154500.Wm82.a6.v1	8e-55
5168-271:	Glyma.10G074100.Wm82.a6.v1	Glyma.13G154700.Wm82.a6.v1	2e-93
## Alignment 5172: score=455.0 e_value=4.4e-12 N=11 Gm10&Gm13 plus
5172- 0:	Glyma.10G197200.Wm82.a6.v1	Glyma.13G146400.Wm82.a6.v1	3e-52
5172- 1:	Glyma.10G197400.Wm82.a6.v1	Glyma.13G146600.Wm82.a6.v1	1e-105
5172- 2:	Glyma.10G198700.Wm82.a6.v1	Glyma.13G147300.Wm82.a6.v1	2e-64
5172- 3:	Glyma.10G200800.Wm82.a6.v1	Glyma.13G147500.Wm82.a6.v1	3e-21
5172- 4:	Glyma.10G201100.Wm82.a6.v1	Glyma.13G149800.Wm82.a6.v1	0
5172- 5:	Glyma.10G201400.Wm82.a6.v1	Glyma.13G149900.Wm82.a6.v1	0
5172- 6:	Glyma.10G201700.Wm82.a6.v1	Glyma.13G150700.Wm82.a6.v1	0
5172- 7:	Glyma.10G202150.Wm82.a6.v1	Glyma.13G151000.Wm82.a6.v1	0
5172- 8:	Glyma.10G203100.Wm82.a6.v1	Glyma.13G152132.Wm82.a6.v1	5e-130
5172- 9:	Glyma.10G203500.Wm82.a6.v1	Glyma.13G152202.Wm82.a6.v1	7e-17
5172- 10:	Glyma.10G205300.Wm82.a6.v1	Glyma.13G152542.Wm82.a6.v1	2e-19
## Alignment 5412: score=29677.0 e_value=0 N=600 Gm10&Gm20 minus
5412- 0:	Glyma.10G165600.Wm82.a6.v1	Glyma.20G223600.Wm82.a6.v1	0
5412- 1:	Glyma.10G165700.Wm82.a6.v1	Glyma.20G223500.Wm82.a6.v1	0
5412- 2:	Glyma.10G165800.Wm82.a6.v1	Glyma.20G223300.Wm82.a6.v1	6e-11
5412- 3:	Glyma.10G166000.Wm82.a6.v1	Glyma.20G223200.Wm82.a6.v1	0
5412- 4:	Glyma.10G166100.Wm82.a6.v1	Glyma.20G223100.Wm82.a6.v1	2e-128
5412- 5:	Glyma.10G166200.Wm82.a6.v1	Glyma.20G223000.Wm82.a6.v1	9e-180
5412- 6:	Glyma.10G166300.Wm82.a6.v1	Glyma.20G222800.Wm82.a6.v1	4e-43
5412- 7:	Glyma.10G166500.Wm82.a6.v1	Glyma.20G222700.Wm82.a6.v1	0
5412- 8:	Glyma.10G166600.Wm82.a6.v1	Glyma.20G222600.Wm82.a6.v1	0
5412- 9:	Glyma.10G166700.Wm82.a6.v1	Glyma.20G222500.Wm82.a6.v1	0
5412- 10:	Glyma.10G166800.Wm82.a6.v1	Glyma.20G222300.Wm82.a6.v1	0
5412- 11:	Glyma.10G166900.Wm82.a6.v1	Glyma.20G222200.Wm82.a6.v1	2e-143
5412- 12:	Glyma.10G167000.Wm82.a6.v1	Glyma.20G222100.Wm82.a6.v1	0
5412- 13:	Glyma.10G167100.Wm82.a6.v1	Glyma.20G222000.Wm82.a6.v1	1e-166
5412- 14:	Glyma.10G167300.Wm82.a6.v1	Glyma.20G221800.Wm82.a6.v1	0
5412- 15:	Glyma.10G167400.Wm82.a6.v1	Glyma.20G221700.Wm82.a6.v1	1e-76
5412- 16:	Glyma.10G167500.Wm82.a6.v1	Glyma.20G221600.Wm82.a6.v1	5e-76
5412- 17:	Glyma.10G167600.Wm82.a6.v1	Glyma.20G221500.Wm82.a6.v1	3e-158
5412- 18:	Glyma.10G167800.Wm82.a6.v1	Glyma.20G221401.Wm82.a6.v1	1e-138
5412- 19:	Glyma.10G168300.Wm82.a6.v1	Glyma.20G221300.Wm82.a6.v1	0
5412- 20:	Glyma.10G168400.Wm82.a6.v1	Glyma.20G221200.Wm82.a6.v1	0
5412- 21:	Glyma.10G168600.Wm82.a6.v1	Glyma.20G221100.Wm82.a6.v1	0
5412- 22:	Glyma.10G168700.Wm82.a6.v1	Glyma.20G221000.Wm82.a6.v1	0
5412- 23:	Glyma.10G168800.Wm82.a6.v1	Glyma.20G220800.Wm82.a6.v1	1e-117
5412- 24:	Glyma.10G169050.Wm82.a6.v1	Glyma.20G220600.Wm82.a6.v1	3e-48
5412- 25:	Glyma.10G169100.Wm82.a6.v1	Glyma.20G220500.Wm82.a6.v1	4e-85
5412- 26:	Glyma.10G169200.Wm82.a6.v1	Glyma.20G220400.Wm82.a6.v1	0
5412- 27:	Glyma.10G169300.Wm82.a6.v1	Glyma.20G220100.Wm82.a6.v1	1e-73
5412- 28:	Glyma.10G169800.Wm82.a6.v1	Glyma.20G220000.Wm82.a6.v1	0
5412- 29:	Glyma.10G170200.Wm82.a6.v1	Glyma.20G219800.Wm82.a6.v1	0
5412- 30:	Glyma.10G170300.Wm82.a6.v1	Glyma.20G219700.Wm82.a6.v1	0
5412- 31:	Glyma.10G170400.Wm82.a6.v1	Glyma.20G219600.Wm82.a6.v1	1e-129
5412- 32:	Glyma.10G170500.Wm82.a6.v1	Glyma.20G219500.Wm82.a6.v1	0
5412- 33:	Glyma.10G170600.Wm82.a6.v1	Glyma.20G219300.Wm82.a6.v1	0
5412- 34:	Glyma.10G170700.Wm82.a6.v1	Glyma.20G219200.Wm82.a6.v1	2e-50
5412- 35:	Glyma.10G170800.Wm82.a6.v1	Glyma.20G219100.Wm82.a6.v1	0
5412- 36:	Glyma.10G171300.Wm82.a6.v1	Glyma.20G218901.Wm82.a6.v1	0
5412- 37:	Glyma.10G171500.Wm82.a6.v1	Glyma.20G218800.Wm82.a6.v1	0
5412- 38:	Glyma.10G171600.Wm82.a6.v1	Glyma.20G218700.Wm82.a6.v1	6e-160
5412- 39:	Glyma.10G171700.Wm82.a6.v1	Glyma.20G218600.Wm82.a6.v1	0
5412- 40:	Glyma.10G171800.Wm82.a6.v1	Glyma.20G218500.Wm82.a6.v1	3e-132
5412- 41:	Glyma.10G171900.Wm82.a6.v1	Glyma.20G218400.Wm82.a6.v1	0
5412- 42:	Glyma.10G172100.Wm82.a6.v1	Glyma.20G218200.Wm82.a6.v1	0
5412- 43:	Glyma.10G172200.Wm82.a6.v1	Glyma.20G218100.Wm82.a6.v1	0
5412- 44:	Glyma.10G172300.Wm82.a6.v1	Glyma.20G217950.Wm82.a6.v1	1e-18
5412- 45:	Glyma.10G172400.Wm82.a6.v1	Glyma.20G217800.Wm82.a6.v1	0
5412- 46:	Glyma.10G172500.Wm82.a6.v1	Glyma.20G217700.Wm82.a6.v1	0
5412- 47:	Glyma.10G172600.Wm82.a6.v1	Glyma.20G217600.Wm82.a6.v1	0
5412- 48:	Glyma.10G172800.Wm82.a6.v1	Glyma.20G217500.Wm82.a6.v1	0
5412- 49:	Glyma.10G172900.Wm82.a6.v1	Glyma.20G217400.Wm82.a6.v1	0
5412- 50:	Glyma.10G173000.Wm82.a6.v1	Glyma.20G217200.Wm82.a6.v1	0
5412- 51:	Glyma.10G173100.Wm82.a6.v1	Glyma.20G217100.Wm82.a6.v1	4e-122
5412- 52:	Glyma.10G173200.Wm82.a6.v1	Glyma.20G217000.Wm82.a6.v1	8e-74
5412- 53:	Glyma.10G173300.Wm82.a6.v1	Glyma.20G216900.Wm82.a6.v1	0
5412- 54:	Glyma.10G173400.Wm82.a6.v1	Glyma.20G216800.Wm82.a6.v1	0
5412- 55:	Glyma.10G173500.Wm82.a6.v1	Glyma.20G216700.Wm82.a6.v1	0
5412- 56:	Glyma.10G173700.Wm82.a6.v1	Glyma.20G216600.Wm82.a6.v1	3e-151
5412- 57:	Glyma.10G173800.Wm82.a6.v1	Glyma.20G216500.Wm82.a6.v1	0
5412- 58:	Glyma.10G174000.Wm82.a6.v1	Glyma.20G216400.Wm82.a6.v1	2e-92
5412- 59:	Glyma.10G174100.Wm82.a6.v1	Glyma.20G216300.Wm82.a6.v1	3e-145
5412- 60:	Glyma.10G174200.Wm82.a6.v1	Glyma.20G216200.Wm82.a6.v1	8e-81
5412- 61:	Glyma.10G174500.Wm82.a6.v1	Glyma.20G216000.Wm82.a6.v1	0
5412- 62:	Glyma.10G174900.Wm82.a6.v1	Glyma.20G215900.Wm82.a6.v1	0
5412- 63:	Glyma.10G175000.Wm82.a6.v1	Glyma.20G215800.Wm82.a6.v1	4e-154
5412- 64:	Glyma.10G175100.Wm82.a6.v1	Glyma.20G215600.Wm82.a6.v1	1e-140
5412- 65:	Glyma.10G175200.Wm82.a6.v1	Glyma.20G215300.Wm82.a6.v1	1e-168
5412- 66:	Glyma.10G175300.Wm82.a6.v1	Glyma.20G215200.Wm82.a6.v1	0
5412- 67:	Glyma.10G175400.Wm82.a6.v1	Glyma.20G215000.Wm82.a6.v1	9e-177
5412- 68:	Glyma.10G175600.Wm82.a6.v1	Glyma.20G214900.Wm82.a6.v1	0
5412- 69:	Glyma.10G175800.Wm82.a6.v1	Glyma.20G214700.Wm82.a6.v1	8e-87
5412- 70:	Glyma.10G175900.Wm82.a6.v1	Glyma.20G214600.Wm82.a6.v1	0
5412- 71:	Glyma.10G176100.Wm82.a6.v1	Glyma.20G214500.Wm82.a6.v1	0
5412- 72:	Glyma.10G176200.Wm82.a6.v1	Glyma.20G214100.Wm82.a6.v1	0
5412- 73:	Glyma.10G176400.Wm82.a6.v1	Glyma.20G213900.Wm82.a6.v1	4e-114
5412- 74:	Glyma.10G176832.Wm82.a6.v1	Glyma.20G213400.Wm82.a6.v1	3e-85
5412- 75:	Glyma.10G176900.Wm82.a6.v1	Glyma.20G213300.Wm82.a6.v1	0
5412- 76:	Glyma.10G177000.Wm82.a6.v1	Glyma.20G213200.Wm82.a6.v1	3e-97
5412- 77:	Glyma.10G177100.Wm82.a6.v1	Glyma.20G213100.Wm82.a6.v1	0
5412- 78:	Glyma.10G177200.Wm82.a6.v1	Glyma.20G212900.Wm82.a6.v1	0
5412- 79:	Glyma.10G177300.Wm82.a6.v1	Glyma.20G212800.Wm82.a6.v1	0
5412- 80:	Glyma.10G177400.Wm82.a6.v1	Glyma.20G212700.Wm82.a6.v1	3e-161
5412- 81:	Glyma.10G177600.Wm82.a6.v1	Glyma.20G212600.Wm82.a6.v1	0
5412- 82:	Glyma.10G177700.Wm82.a6.v1	Glyma.20G212400.Wm82.a6.v1	1e-98
5412- 83:	Glyma.10G177800.Wm82.a6.v1	Glyma.20G212300.Wm82.a6.v1	4e-90
5412- 84:	Glyma.10G178000.Wm82.a6.v1	Glyma.20G212200.Wm82.a6.v1	0
5412- 85:	Glyma.10G178100.Wm82.a6.v1	Glyma.20G212100.Wm82.a6.v1	0
5412- 86:	Glyma.10G178200.Wm82.a6.v1	Glyma.20G212000.Wm82.a6.v1	0
5412- 87:	Glyma.10G178300.Wm82.a6.v1	Glyma.20G211800.Wm82.a6.v1	0
5412- 88:	Glyma.10G178400.Wm82.a6.v1	Glyma.20G211700.Wm82.a6.v1	9e-105
5412- 89:	Glyma.10G178600.Wm82.a6.v1	Glyma.20G211500.Wm82.a6.v1	1e-162
5412- 90:	Glyma.10G178700.Wm82.a6.v1	Glyma.20G211400.Wm82.a6.v1	9e-63
5412- 91:	Glyma.10G178900.Wm82.a6.v1	Glyma.20G211200.Wm82.a6.v1	0
5412- 92:	Glyma.10G179100.Wm82.a6.v1	Glyma.20G211100.Wm82.a6.v1	0
5412- 93:	Glyma.10G179200.Wm82.a6.v1	Glyma.20G211000.Wm82.a6.v1	0
5412- 94:	Glyma.10G179400.Wm82.a6.v1	Glyma.20G210900.Wm82.a6.v1	0
5412- 95:	Glyma.10G179600.Wm82.a6.v1	Glyma.20G210800.Wm82.a6.v1	0
5412- 96:	Glyma.10G179700.Wm82.a6.v1	Glyma.20G210700.Wm82.a6.v1	0
5412- 97:	Glyma.10G179800.Wm82.a6.v1	Glyma.20G210600.Wm82.a6.v1	0
5412- 98:	Glyma.10G180000.Wm82.a6.v1	Glyma.20G210400.Wm82.a6.v1	7e-52
5412- 99:	Glyma.10G180200.Wm82.a6.v1	Glyma.20G210300.Wm82.a6.v1	0
5412-100:	Glyma.10G180300.Wm82.a6.v1	Glyma.20G210200.Wm82.a6.v1	0
5412-101:	Glyma.10G180500.Wm82.a6.v1	Glyma.20G210100.Wm82.a6.v1	0
5412-102:	Glyma.10G180600.Wm82.a6.v1	Glyma.20G209900.Wm82.a6.v1	0
5412-103:	Glyma.10G180700.Wm82.a6.v1	Glyma.20G209800.Wm82.a6.v1	4e-110
5412-104:	Glyma.10G180800.Wm82.a6.v1	Glyma.20G209700.Wm82.a6.v1	0
5412-105:	Glyma.10G180900.Wm82.a6.v1	Glyma.20G209500.Wm82.a6.v1	2e-65
5412-106:	Glyma.10G181100.Wm82.a6.v1	Glyma.20G209400.Wm82.a6.v1	0
5412-107:	Glyma.10G181200.Wm82.a6.v1	Glyma.20G209200.Wm82.a6.v1	2e-109
5412-108:	Glyma.10G181400.Wm82.a6.v1	Glyma.20G209000.Wm82.a6.v1	0
5412-109:	Glyma.10G181500.Wm82.a6.v1	Glyma.20G208900.Wm82.a6.v1	0
5412-110:	Glyma.10G181700.Wm82.a6.v1	Glyma.20G208800.Wm82.a6.v1	0
5412-111:	Glyma.10G181800.Wm82.a6.v1	Glyma.20G208500.Wm82.a6.v1	0
5412-112:	Glyma.10G181900.Wm82.a6.v1	Glyma.20G208100.Wm82.a6.v1	0
5412-113:	Glyma.10G182000.Wm82.a6.v1	Glyma.20G208000.Wm82.a6.v1	0
5412-114:	Glyma.10G182200.Wm82.a6.v1	Glyma.20G207800.Wm82.a6.v1	0
5412-115:	Glyma.10G182300.Wm82.a6.v1	Glyma.20G207700.Wm82.a6.v1	0
5412-116:	Glyma.10G182400.Wm82.a6.v1	Glyma.20G207600.Wm82.a6.v1	0
5412-117:	Glyma.10G182500.Wm82.a6.v1	Glyma.20G207500.Wm82.a6.v1	8e-89
5412-118:	Glyma.10G182600.Wm82.a6.v1	Glyma.20G207400.Wm82.a6.v1	5e-151
5412-119:	Glyma.10G182700.Wm82.a6.v1	Glyma.20G207300.Wm82.a6.v1	1e-90
5412-120:	Glyma.10G182800.Wm82.a6.v1	Glyma.20G207200.Wm82.a6.v1	0
5412-121:	Glyma.10G183200.Wm82.a6.v1	Glyma.20G207000.Wm82.a6.v1	0
5412-122:	Glyma.10G183300.Wm82.a6.v1	Glyma.20G206900.Wm82.a6.v1	0
5412-123:	Glyma.10G183500.Wm82.a6.v1	Glyma.20G206800.Wm82.a6.v1	1e-134
5412-124:	Glyma.10G183600.Wm82.a6.v1	Glyma.20G206700.Wm82.a6.v1	9e-51
5412-125:	Glyma.10G183666.Wm82.a6.v1	Glyma.20G206601.Wm82.a6.v1	4e-19
5412-126:	Glyma.10G183700.Wm82.a6.v1	Glyma.20G206500.Wm82.a6.v1	1e-163
5412-127:	Glyma.10G183800.Wm82.a6.v1	Glyma.20G206400.Wm82.a6.v1	7e-158
5412-128:	Glyma.10G183900.Wm82.a6.v1	Glyma.20G206300.Wm82.a6.v1	0
5412-129:	Glyma.10G184300.Wm82.a6.v1	Glyma.20G206200.Wm82.a6.v1	7e-114
5412-130:	Glyma.10G184500.Wm82.a6.v1	Glyma.20G206000.Wm82.a6.v1	6e-108
5412-131:	Glyma.10G184600.Wm82.a6.v1	Glyma.20G205700.Wm82.a6.v1	7e-32
5412-132:	Glyma.10G184800.Wm82.a6.v1	Glyma.20G205600.Wm82.a6.v1	3e-178
5412-133:	Glyma.10G184900.Wm82.a6.v1	Glyma.20G205500.Wm82.a6.v1	0
5412-134:	Glyma.10G185000.Wm82.a6.v1	Glyma.20G205400.Wm82.a6.v1	0
5412-135:	Glyma.10G185100.Wm82.a6.v1	Glyma.20G205301.Wm82.a6.v1	9e-100
5412-136:	Glyma.10G185200.Wm82.a6.v1	Glyma.20G205100.Wm82.a6.v1	0
5412-137:	Glyma.10G185400.Wm82.a6.v1	Glyma.20G205000.Wm82.a6.v1	0
5412-138:	Glyma.10G185600.Wm82.a6.v1	Glyma.20G204400.Wm82.a6.v1	2e-86
5412-139:	Glyma.10G186200.Wm82.a6.v1	Glyma.20G204300.Wm82.a6.v1	2e-53
5412-140:	Glyma.10G186300.Wm82.a6.v1	Glyma.20G204200.Wm82.a6.v1	1e-75
5412-141:	Glyma.10G186400.Wm82.a6.v1	Glyma.20G204000.Wm82.a6.v1	0
5412-142:	Glyma.10G186600.Wm82.a6.v1	Glyma.20G203900.Wm82.a6.v1	0
5412-143:	Glyma.10G186700.Wm82.a6.v1	Glyma.20G203800.Wm82.a6.v1	2e-69
5412-144:	Glyma.10G186800.Wm82.a6.v1	Glyma.20G203500.Wm82.a6.v1	4e-23
5412-145:	Glyma.10G187100.Wm82.a6.v1	Glyma.20G203400.Wm82.a6.v1	0
5412-146:	Glyma.10G187300.Wm82.a6.v1	Glyma.20G203200.Wm82.a6.v1	0
5412-147:	Glyma.10G187400.Wm82.a6.v1	Glyma.20G203100.Wm82.a6.v1	8e-22
5412-148:	Glyma.10G187800.Wm82.a6.v1	Glyma.20G203000.Wm82.a6.v1	1e-103
5412-149:	Glyma.10G187900.Wm82.a6.v1	Glyma.20G202900.Wm82.a6.v1	2e-96
5412-150:	Glyma.10G188000.Wm82.a6.v1	Glyma.20G202800.Wm82.a6.v1	0
5412-151:	Glyma.10G188100.Wm82.a6.v1	Glyma.20G202700.Wm82.a6.v1	0
5412-152:	Glyma.10G188200.Wm82.a6.v1	Glyma.20G202600.Wm82.a6.v1	5e-50
5412-153:	Glyma.10G188300.Wm82.a6.v1	Glyma.20G202500.Wm82.a6.v1	0
5412-154:	Glyma.10G188400.Wm82.a6.v1	Glyma.20G202300.Wm82.a6.v1	6e-114
5412-155:	Glyma.10G188500.Wm82.a6.v1	Glyma.20G202200.Wm82.a6.v1	0
5412-156:	Glyma.10G188600.Wm82.a6.v1	Glyma.20G202100.Wm82.a6.v1	0
5412-157:	Glyma.10G188701.Wm82.a6.v1	Glyma.20G201800.Wm82.a6.v1	2e-51
5412-158:	Glyma.10G189000.Wm82.a6.v1	Glyma.20G201600.Wm82.a6.v1	0
5412-159:	Glyma.10G189200.Wm82.a6.v1	Glyma.20G201500.Wm82.a6.v1	0
5412-160:	Glyma.10G189300.Wm82.a6.v1	Glyma.20G201450.Wm82.a6.v1	1e-45
5412-161:	Glyma.10G189400.Wm82.a6.v1	Glyma.20G201400.Wm82.a6.v1	0
5412-162:	Glyma.10G189500.Wm82.a6.v1	Glyma.20G201300.Wm82.a6.v1	0
5412-163:	Glyma.10G189700.Wm82.a6.v1	Glyma.20G201200.Wm82.a6.v1	6e-173
5412-164:	Glyma.10G189800.Wm82.a6.v1	Glyma.20G201100.Wm82.a6.v1	6e-58
5412-165:	Glyma.10G189900.Wm82.a6.v1	Glyma.20G201000.Wm82.a6.v1	9e-76
5412-166:	Glyma.10G190000.Wm82.a6.v1	Glyma.20G200800.Wm82.a6.v1	4e-86
5412-167:	Glyma.10G190100.Wm82.a6.v1	Glyma.20G200700.Wm82.a6.v1	0
5412-168:	Glyma.10G190200.Wm82.a6.v1	Glyma.20G200500.Wm82.a6.v1	0
5412-169:	Glyma.10G190300.Wm82.a6.v1	Glyma.20G200400.Wm82.a6.v1	0
5412-170:	Glyma.10G190400.Wm82.a6.v1	Glyma.20G200300.Wm82.a6.v1	0
5412-171:	Glyma.10G190500.Wm82.a6.v1	Glyma.20G200200.Wm82.a6.v1	0
5412-172:	Glyma.10G190600.Wm82.a6.v1	Glyma.20G200067.Wm82.a6.v1	0
5412-173:	Glyma.10G190650.Wm82.a6.v1	Glyma.20G199900.Wm82.a6.v1	4e-34
5412-174:	Glyma.10G190700.Wm82.a6.v1	Glyma.20G199800.Wm82.a6.v1	0
5412-175:	Glyma.10G191000.Wm82.a6.v1	Glyma.20G199300.Wm82.a6.v1	1e-158
5412-176:	Glyma.10G191100.Wm82.a6.v1	Glyma.20G199201.Wm82.a6.v1	7e-59
5412-177:	Glyma.10G191200.Wm82.a6.v1	Glyma.20G199100.Wm82.a6.v1	7e-178
5412-178:	Glyma.10G191333.Wm82.a6.v1	Glyma.20G199000.Wm82.a6.v1	4e-87
5412-179:	Glyma.10G191400.Wm82.a6.v1	Glyma.20G198900.Wm82.a6.v1	8e-160
5412-180:	Glyma.10G191500.Wm82.a6.v1	Glyma.20G198732.Wm82.a6.v1	1e-86
5412-181:	Glyma.10G191600.Wm82.a6.v1	Glyma.20G198600.Wm82.a6.v1	0
5412-182:	Glyma.10G192000.Wm82.a6.v1	Glyma.20G198500.Wm82.a6.v1	2e-121
5412-183:	Glyma.10G192066.Wm82.a6.v1	Glyma.20G198402.Wm82.a6.v1	2e-163
5412-184:	Glyma.10G192200.Wm82.a6.v1	Glyma.20G198200.Wm82.a6.v1	0
5412-185:	Glyma.10G192300.Wm82.a6.v1	Glyma.20G198100.Wm82.a6.v1	0
5412-186:	Glyma.10G192400.Wm82.a6.v1	Glyma.20G198000.Wm82.a6.v1	0
5412-187:	Glyma.10G192600.Wm82.a6.v1	Glyma.20G197900.Wm82.a6.v1	3e-78
5412-188:	Glyma.10G192700.Wm82.a6.v1	Glyma.20G197800.Wm82.a6.v1	0
5412-189:	Glyma.10G192800.Wm82.a6.v1	Glyma.20G197700.Wm82.a6.v1	0
5412-190:	Glyma.10G192900.Wm82.a6.v1	Glyma.20G197600.Wm82.a6.v1	4e-106
5412-191:	Glyma.10G193000.Wm82.a6.v1	Glyma.20G197500.Wm82.a6.v1	0
5412-192:	Glyma.10G193100.Wm82.a6.v1	Glyma.20G197300.Wm82.a6.v1	0
5412-193:	Glyma.10G193200.Wm82.a6.v1	Glyma.20G197100.Wm82.a6.v1	0
5412-194:	Glyma.10G193400.Wm82.a6.v1	Glyma.20G197000.Wm82.a6.v1	0
5412-195:	Glyma.10G193500.Wm82.a6.v1	Glyma.20G196900.Wm82.a6.v1	5e-177
5412-196:	Glyma.10G193600.Wm82.a6.v1	Glyma.20G196800.Wm82.a6.v1	7e-122
5412-197:	Glyma.10G193700.Wm82.a6.v1	Glyma.20G196700.Wm82.a6.v1	2e-100
5412-198:	Glyma.10G193900.Wm82.a6.v1	Glyma.20G196600.Wm82.a6.v1	6e-81
5412-199:	Glyma.10G194000.Wm82.a6.v1	Glyma.20G196000.Wm82.a6.v1	0
5412-200:	Glyma.10G194200.Wm82.a6.v1	Glyma.20G195900.Wm82.a6.v1	2e-134
5412-201:	Glyma.10G194300.Wm82.a6.v1	Glyma.20G195733.Wm82.a6.v1	5e-56
5412-202:	Glyma.10G194400.Wm82.a6.v1	Glyma.20G195600.Wm82.a6.v1	0
5412-203:	Glyma.10G194600.Wm82.a6.v1	Glyma.20G195300.Wm82.a6.v1	0
5412-204:	Glyma.10G194700.Wm82.a6.v1	Glyma.20G195200.Wm82.a6.v1	0
5412-205:	Glyma.10G194800.Wm82.a6.v1	Glyma.20G195100.Wm82.a6.v1	5e-148
5412-206:	Glyma.10G194900.Wm82.a6.v1	Glyma.20G195050.Wm82.a6.v1	4e-18
5412-207:	Glyma.10G195050.Wm82.a6.v1	Glyma.20G195000.Wm82.a6.v1	0
5412-208:	Glyma.10G195200.Wm82.a6.v1	Glyma.20G194880.Wm82.a6.v1	0
5412-209:	Glyma.10G195300.Wm82.a6.v1	Glyma.20G194760.Wm82.a6.v1	3e-135
5412-210:	Glyma.10G195500.Wm82.a6.v1	Glyma.20G194640.Wm82.a6.v1	1e-95
5412-211:	Glyma.10G195600.Wm82.a6.v1	Glyma.20G194520.Wm82.a6.v1	2e-170
5412-212:	Glyma.10G195700.Wm82.a6.v1	Glyma.20G194400.Wm82.a6.v1	0
5412-213:	Glyma.10G195900.Wm82.a6.v1	Glyma.20G194200.Wm82.a6.v1	3e-139
5412-214:	Glyma.10G196100.Wm82.a6.v1	Glyma.20G194100.Wm82.a6.v1	0
5412-215:	Glyma.10G196200.Wm82.a6.v1	Glyma.20G194000.Wm82.a6.v1	6e-130
5412-216:	Glyma.10G196300.Wm82.a6.v1	Glyma.20G193900.Wm82.a6.v1	0
5412-217:	Glyma.10G196400.Wm82.a6.v1	Glyma.20G193800.Wm82.a6.v1	0
5412-218:	Glyma.10G196500.Wm82.a6.v1	Glyma.20G193700.Wm82.a6.v1	8e-138
5412-219:	Glyma.10G196600.Wm82.a6.v1	Glyma.20G193600.Wm82.a6.v1	0
5412-220:	Glyma.10G196750.Wm82.a6.v1	Glyma.20G193300.Wm82.a6.v1	0
5412-221:	Glyma.10G196900.Wm82.a6.v1	Glyma.20G193200.Wm82.a6.v1	0
5412-222:	Glyma.10G197100.Wm82.a6.v1	Glyma.20G193100.Wm82.a6.v1	8e-71
5412-223:	Glyma.10G197200.Wm82.a6.v1	Glyma.20G193000.Wm82.a6.v1	0
5412-224:	Glyma.10G197300.Wm82.a6.v1	Glyma.20G192800.Wm82.a6.v1	0
5412-225:	Glyma.10G197400.Wm82.a6.v1	Glyma.20G192600.Wm82.a6.v1	5e-148
5412-226:	Glyma.10G197500.Wm82.a6.v1	Glyma.20G192300.Wm82.a6.v1	2e-76
5412-227:	Glyma.10G197700.Wm82.a6.v1	Glyma.20G192200.Wm82.a6.v1	0
5412-228:	Glyma.10G197800.Wm82.a6.v1	Glyma.20G192100.Wm82.a6.v1	0
5412-229:	Glyma.10G198000.Wm82.a6.v1	Glyma.20G191900.Wm82.a6.v1	0
5412-230:	Glyma.10G198100.Wm82.a6.v1	Glyma.20G191800.Wm82.a6.v1	0
5412-231:	Glyma.10G198300.Wm82.a6.v1	Glyma.20G191700.Wm82.a6.v1	0
5412-232:	Glyma.10G198500.Wm82.a6.v1	Glyma.20G191600.Wm82.a6.v1	2e-87
5412-233:	Glyma.10G198600.Wm82.a6.v1	Glyma.20G191400.Wm82.a6.v1	0
5412-234:	Glyma.10G198700.Wm82.a6.v1	Glyma.20G191300.Wm82.a6.v1	6e-58
5412-235:	Glyma.10G198800.Wm82.a6.v1	Glyma.20G191200.Wm82.a6.v1	2e-98
5412-236:	Glyma.10G199232.Wm82.a6.v1	Glyma.20G191000.Wm82.a6.v1	6e-79
5412-237:	Glyma.10G199300.Wm82.a6.v1	Glyma.20G190900.Wm82.a6.v1	0
5412-238:	Glyma.10G199500.Wm82.a6.v1	Glyma.20G190800.Wm82.a6.v1	9e-67
5412-239:	Glyma.10G199800.Wm82.a6.v1	Glyma.20G190700.Wm82.a6.v1	3e-30
5412-240:	Glyma.10G199900.Wm82.a6.v1	Glyma.20G190600.Wm82.a6.v1	0
5412-241:	Glyma.10G200000.Wm82.a6.v1	Glyma.20G190500.Wm82.a6.v1	0
5412-242:	Glyma.10G200100.Wm82.a6.v1	Glyma.20G190400.Wm82.a6.v1	0
5412-243:	Glyma.10G200200.Wm82.a6.v1	Glyma.20G190300.Wm82.a6.v1	0
5412-244:	Glyma.10G200300.Wm82.a6.v1	Glyma.20G190200.Wm82.a6.v1	0
5412-245:	Glyma.10G200500.Wm82.a6.v1	Glyma.20G190100.Wm82.a6.v1	0
5412-246:	Glyma.10G200600.Wm82.a6.v1	Glyma.20G190000.Wm82.a6.v1	0
5412-247:	Glyma.10G200700.Wm82.a6.v1	Glyma.20G189900.Wm82.a6.v1	0
5412-248:	Glyma.10G200800.Wm82.a6.v1	Glyma.20G189600.Wm82.a6.v1	0
5412-249:	Glyma.10G201000.Wm82.a6.v1	Glyma.20G189500.Wm82.a6.v1	0
5412-250:	Glyma.10G201100.Wm82.a6.v1	Glyma.20G189300.Wm82.a6.v1	0
5412-251:	Glyma.10G201200.Wm82.a6.v1	Glyma.20G189200.Wm82.a6.v1	0
5412-252:	Glyma.10G201300.Wm82.a6.v1	Glyma.20G189100.Wm82.a6.v1	0
5412-253:	Glyma.10G201400.Wm82.a6.v1	Glyma.20G189033.Wm82.a6.v1	4e-114
5412-254:	Glyma.10G201500.Wm82.a6.v1	Glyma.20G188900.Wm82.a6.v1	2e-81
5412-255:	Glyma.10G201700.Wm82.a6.v1	Glyma.20G188600.Wm82.a6.v1	0
5412-256:	Glyma.10G201900.Wm82.a6.v1	Glyma.20G188500.Wm82.a6.v1	0
5412-257:	Glyma.10G202000.Wm82.a6.v1	Glyma.20G188400.Wm82.a6.v1	0
5412-258:	Glyma.10G202150.Wm82.a6.v1	Glyma.20G188300.Wm82.a6.v1	0
5412-259:	Glyma.10G202300.Wm82.a6.v1	Glyma.20G188100.Wm82.a6.v1	0
5412-260:	Glyma.10G202400.Wm82.a6.v1	Glyma.20G188000.Wm82.a6.v1	0
5412-261:	Glyma.10G202500.Wm82.a6.v1	Glyma.20G187900.Wm82.a6.v1	3e-165
5412-262:	Glyma.10G202600.Wm82.a6.v1	Glyma.20G187800.Wm82.a6.v1	0
5412-263:	Glyma.10G202700.Wm82.a6.v1	Glyma.20G187600.Wm82.a6.v1	9e-113
5412-264:	Glyma.10G202800.Wm82.a6.v1	Glyma.20G187500.Wm82.a6.v1	0
5412-265:	Glyma.10G203000.Wm82.a6.v1	Glyma.20G187400.Wm82.a6.v1	0
5412-266:	Glyma.10G203100.Wm82.a6.v1	Glyma.20G187200.Wm82.a6.v1	0
5412-267:	Glyma.10G203200.Wm82.a6.v1	Glyma.20G187100.Wm82.a6.v1	6e-52
5412-268:	Glyma.10G203800.Wm82.a6.v1	Glyma.20G186800.Wm82.a6.v1	0
5412-269:	Glyma.10G204001.Wm82.a6.v1	Glyma.20G186700.Wm82.a6.v1	0
5412-270:	Glyma.10G204100.Wm82.a6.v1	Glyma.20G186600.Wm82.a6.v1	2e-29
5412-271:	Glyma.10G204200.Wm82.a6.v1	Glyma.20G186500.Wm82.a6.v1	0
5412-272:	Glyma.10G204300.Wm82.a6.v1	Glyma.20G186400.Wm82.a6.v1	3e-175
5412-273:	Glyma.10G204400.Wm82.a6.v1	Glyma.20G186200.Wm82.a6.v1	0
5412-274:	Glyma.10G204501.Wm82.a6.v1	Glyma.20G186000.Wm82.a6.v1	3e-85
5412-275:	Glyma.10G204600.Wm82.a6.v1	Glyma.20G185900.Wm82.a6.v1	1e-26
5412-276:	Glyma.10G204700.Wm82.a6.v1	Glyma.20G185800.Wm82.a6.v1	0
5412-277:	Glyma.10G204800.Wm82.a6.v1	Glyma.20G185700.Wm82.a6.v1	0
5412-278:	Glyma.10G204900.Wm82.a6.v1	Glyma.20G185600.Wm82.a6.v1	0
5412-279:	Glyma.10G205000.Wm82.a6.v1	Glyma.20G185500.Wm82.a6.v1	0
5412-280:	Glyma.10G205100.Wm82.a6.v1	Glyma.20G185400.Wm82.a6.v1	7e-61
5412-281:	Glyma.10G205233.Wm82.a6.v1	Glyma.20G185167.Wm82.a6.v1	3e-59
5412-282:	Glyma.10G205300.Wm82.a6.v1	Glyma.20G185100.Wm82.a6.v1	0
5412-283:	Glyma.10G205400.Wm82.a6.v1	Glyma.20G185000.Wm82.a6.v1	2e-59
5412-284:	Glyma.10G205600.Wm82.a6.v1	Glyma.20G184900.Wm82.a6.v1	0
5412-285:	Glyma.10G205700.Wm82.a6.v1	Glyma.20G184800.Wm82.a6.v1	1e-29
5412-286:	Glyma.10G205800.Wm82.a6.v1	Glyma.20G184700.Wm82.a6.v1	3e-23
5412-287:	Glyma.10G205900.Wm82.a6.v1	Glyma.20G184600.Wm82.a6.v1	2e-121
5412-288:	Glyma.10G205966.Wm82.a6.v1	Glyma.20G184500.Wm82.a6.v1	4e-166
5412-289:	Glyma.10G206100.Wm82.a6.v1	Glyma.20G184400.Wm82.a6.v1	2e-171
5412-290:	Glyma.10G206300.Wm82.a6.v1	Glyma.20G184300.Wm82.a6.v1	0
5412-291:	Glyma.10G206400.Wm82.a6.v1	Glyma.20G184100.Wm82.a6.v1	7e-126
5412-292:	Glyma.10G206600.Wm82.a6.v1	Glyma.20G184000.Wm82.a6.v1	0
5412-293:	Glyma.10G206766.Wm82.a6.v1	Glyma.20G183866.Wm82.a6.v1	7e-09
5412-294:	Glyma.10G207100.Wm82.a6.v1	Glyma.20G183733.Wm82.a6.v1	0
5412-295:	Glyma.10G207200.Wm82.a6.v1	Glyma.20G183600.Wm82.a6.v1	9e-87
5412-296:	Glyma.10G207400.Wm82.a6.v1	Glyma.20G183500.Wm82.a6.v1	2e-118
5412-297:	Glyma.10G207500.Wm82.a6.v1	Glyma.20G183400.Wm82.a6.v1	0
5412-298:	Glyma.10G207700.Wm82.a6.v1	Glyma.20G183100.Wm82.a6.v1	0
5412-299:	Glyma.10G207800.Wm82.a6.v1	Glyma.20G182950.Wm82.a6.v1	1e-110
5412-300:	Glyma.10G207900.Wm82.a6.v1	Glyma.20G182800.Wm82.a6.v1	0
5412-301:	Glyma.10G208200.Wm82.a6.v1	Glyma.20G182600.Wm82.a6.v1	0
5412-302:	Glyma.10G208300.Wm82.a6.v1	Glyma.20G182400.Wm82.a6.v1	3e-150
5412-303:	Glyma.10G208400.Wm82.a6.v1	Glyma.20G182300.Wm82.a6.v1	5e-29
5412-304:	Glyma.10G208600.Wm82.a6.v1	Glyma.20G182100.Wm82.a6.v1	1e-56
5412-305:	Glyma.10G208700.Wm82.a6.v1	Glyma.20G182000.Wm82.a6.v1	1e-170
5412-306:	Glyma.10G208800.Wm82.a6.v1	Glyma.20G181900.Wm82.a6.v1	0
5412-307:	Glyma.10G209000.Wm82.a6.v1	Glyma.20G181600.Wm82.a6.v1	0
5412-308:	Glyma.10G209100.Wm82.a6.v1	Glyma.20G181500.Wm82.a6.v1	0
5412-309:	Glyma.10G209200.Wm82.a6.v1	Glyma.20G181400.Wm82.a6.v1	0
5412-310:	Glyma.10G209300.Wm82.a6.v1	Glyma.20G181300.Wm82.a6.v1	0
5412-311:	Glyma.10G209400.Wm82.a6.v1	Glyma.20G181200.Wm82.a6.v1	5e-135
5412-312:	Glyma.10G209500.Wm82.a6.v1	Glyma.20G181100.Wm82.a6.v1	1e-122
5412-313:	Glyma.10G209600.Wm82.a6.v1	Glyma.20G181000.Wm82.a6.v1	0
5412-314:	Glyma.10G209700.Wm82.a6.v1	Glyma.20G180900.Wm82.a6.v1	3e-59
5412-315:	Glyma.10G209800.Wm82.a6.v1	Glyma.20G180800.Wm82.a6.v1	0
5412-316:	Glyma.10G209900.Wm82.a6.v1	Glyma.20G180701.Wm82.a6.v1	0
5412-317:	Glyma.10G210000.Wm82.a6.v1	Glyma.20G180600.Wm82.a6.v1	0
5412-318:	Glyma.10G210051.Wm82.a6.v1	Glyma.20G180551.Wm82.a6.v1	0
5412-319:	Glyma.10G210100.Wm82.a6.v1	Glyma.20G180500.Wm82.a6.v1	8e-76
5412-320:	Glyma.10G210200.Wm82.a6.v1	Glyma.20G180400.Wm82.a6.v1	0
5412-321:	Glyma.10G210300.Wm82.a6.v1	Glyma.20G180300.Wm82.a6.v1	0
5412-322:	Glyma.10G210500.Wm82.a6.v1	Glyma.20G180100.Wm82.a6.v1	0
5412-323:	Glyma.10G210600.Wm82.a6.v1	Glyma.20G180000.Wm82.a6.v1	0
5412-324:	Glyma.10G210700.Wm82.a6.v1	Glyma.20G179900.Wm82.a6.v1	0
5412-325:	Glyma.10G210800.Wm82.a6.v1	Glyma.20G179800.Wm82.a6.v1	0
5412-326:	Glyma.10G211000.Wm82.a6.v1	Glyma.20G179700.Wm82.a6.v1	0
5412-327:	Glyma.10G211300.Wm82.a6.v1	Glyma.20G179600.Wm82.a6.v1	0
5412-328:	Glyma.10G211400.Wm82.a6.v1	Glyma.20G179500.Wm82.a6.v1	0
5412-329:	Glyma.10G211600.Wm82.a6.v1	Glyma.20G179400.Wm82.a6.v1	0
5412-330:	Glyma.10G211800.Wm82.a6.v1	Glyma.20G179300.Wm82.a6.v1	2e-12
5412-331:	Glyma.10G212000.Wm82.a6.v1	Glyma.20G179100.Wm82.a6.v1	0
5412-332:	Glyma.10G212200.Wm82.a6.v1	Glyma.20G178900.Wm82.a6.v1	4e-132
5412-333:	Glyma.10G212300.Wm82.a6.v1	Glyma.20G178800.Wm82.a6.v1	0
5412-334:	Glyma.10G212400.Wm82.a6.v1	Glyma.20G178700.Wm82.a6.v1	0
5412-335:	Glyma.10G212500.Wm82.a6.v1	Glyma.20G178600.Wm82.a6.v1	0
5412-336:	Glyma.10G212600.Wm82.a6.v1	Glyma.20G178500.Wm82.a6.v1	0
5412-337:	Glyma.10G212700.Wm82.a6.v1	Glyma.20G178300.Wm82.a6.v1	0
5412-338:	Glyma.10G212800.Wm82.a6.v1	Glyma.20G178200.Wm82.a6.v1	3e-141
5412-339:	Glyma.10G213000.Wm82.a6.v1	Glyma.20G178000.Wm82.a6.v1	3e-119
5412-340:	Glyma.10G213100.Wm82.a6.v1	Glyma.20G177900.Wm82.a6.v1	0
5412-341:	Glyma.10G213200.Wm82.a6.v1	Glyma.20G177800.Wm82.a6.v1	0
5412-342:	Glyma.10G213400.Wm82.a6.v1	Glyma.20G177700.Wm82.a6.v1	1e-119
5412-343:	Glyma.10G213500.Wm82.a6.v1	Glyma.20G177600.Wm82.a6.v1	6e-158
5412-344:	Glyma.10G214100.Wm82.a6.v1	Glyma.20G177500.Wm82.a6.v1	0
5412-345:	Glyma.10G214200.Wm82.a6.v1	Glyma.20G177400.Wm82.a6.v1	1e-96
5412-346:	Glyma.10G214600.Wm82.a6.v1	Glyma.20G177300.Wm82.a6.v1	7e-39
5412-347:	Glyma.10G214700.Wm82.a6.v1	Glyma.20G177200.Wm82.a6.v1	0
5412-348:	Glyma.10G214800.Wm82.a6.v1	Glyma.20G177100.Wm82.a6.v1	3e-130
5412-349:	Glyma.10G214900.Wm82.a6.v1	Glyma.20G176900.Wm82.a6.v1	0
5412-350:	Glyma.10G215000.Wm82.a6.v1	Glyma.20G176800.Wm82.a6.v1	0
5412-351:	Glyma.10G215100.Wm82.a6.v1	Glyma.20G176632.Wm82.a6.v1	5e-141
5412-352:	Glyma.10G215200.Wm82.a6.v1	Glyma.20G176500.Wm82.a6.v1	0
5412-353:	Glyma.10G215300.Wm82.a6.v1	Glyma.20G176400.Wm82.a6.v1	0
5412-354:	Glyma.10G215400.Wm82.a6.v1	Glyma.20G176300.Wm82.a6.v1	0
5412-355:	Glyma.10G215500.Wm82.a6.v1	Glyma.20G176200.Wm82.a6.v1	8e-106
5412-356:	Glyma.10G215700.Wm82.a6.v1	Glyma.20G176066.Wm82.a6.v1	0
5412-357:	Glyma.10G215800.Wm82.a6.v1	Glyma.20G176000.Wm82.a6.v1	0
5412-358:	Glyma.10G215901.Wm82.a6.v1	Glyma.20G175900.Wm82.a6.v1	5e-48
5412-359:	Glyma.10G216000.Wm82.a6.v1	Glyma.20G175800.Wm82.a6.v1	1e-48
5412-360:	Glyma.10G216200.Wm82.a6.v1	Glyma.20G175700.Wm82.a6.v1	0
5412-361:	Glyma.10G216400.Wm82.a6.v1	Glyma.20G175500.Wm82.a6.v1	0
5412-362:	Glyma.10G216600.Wm82.a6.v1	Glyma.20G175400.Wm82.a6.v1	0
5412-363:	Glyma.10G216700.Wm82.a6.v1	Glyma.20G175300.Wm82.a6.v1	3e-144
5412-364:	Glyma.10G216900.Wm82.a6.v1	Glyma.20G175100.Wm82.a6.v1	0
5412-365:	Glyma.10G217100.Wm82.a6.v1	Glyma.20G175000.Wm82.a6.v1	3e-78
5412-366:	Glyma.10G217200.Wm82.a6.v1	Glyma.20G174900.Wm82.a6.v1	0
5412-367:	Glyma.10G217300.Wm82.a6.v1	Glyma.20G174800.Wm82.a6.v1	0
5412-368:	Glyma.10G217400.Wm82.a6.v1	Glyma.20G174600.Wm82.a6.v1	2e-105
5412-369:	Glyma.10G217500.Wm82.a6.v1	Glyma.20G174500.Wm82.a6.v1	0
5412-370:	Glyma.10G217700.Wm82.a6.v1	Glyma.20G174400.Wm82.a6.v1	0
5412-371:	Glyma.10G217800.Wm82.a6.v1	Glyma.20G174300.Wm82.a6.v1	0
5412-372:	Glyma.10G217900.Wm82.a6.v1	Glyma.20G174200.Wm82.a6.v1	1e-73
5412-373:	Glyma.10G218000.Wm82.a6.v1	Glyma.20G174000.Wm82.a6.v1	0
5412-374:	Glyma.10G218100.Wm82.a6.v1	Glyma.20G173700.Wm82.a6.v1	0
5412-375:	Glyma.10G218200.Wm82.a6.v1	Glyma.20G173400.Wm82.a6.v1	2e-130
5412-376:	Glyma.10G218300.Wm82.a6.v1	Glyma.20G173300.Wm82.a6.v1	2e-82
5412-377:	Glyma.10G218400.Wm82.a6.v1	Glyma.20G173200.Wm82.a6.v1	0
5412-378:	Glyma.10G218500.Wm82.a6.v1	Glyma.20G173100.Wm82.a6.v1	5e-63
5412-379:	Glyma.10G218800.Wm82.a6.v1	Glyma.20G173000.Wm82.a6.v1	0
5412-380:	Glyma.10G218900.Wm82.a6.v1	Glyma.20G172900.Wm82.a6.v1	2e-57
5412-381:	Glyma.10G219000.Wm82.a6.v1	Glyma.20G172800.Wm82.a6.v1	2e-71
5412-382:	Glyma.10G219100.Wm82.a6.v1	Glyma.20G172600.Wm82.a6.v1	0
5412-383:	Glyma.10G219300.Wm82.a6.v1	Glyma.20G172400.Wm82.a6.v1	6e-81
5412-384:	Glyma.10G219400.Wm82.a6.v1	Glyma.20G172300.Wm82.a6.v1	2e-133
5412-385:	Glyma.10G219500.Wm82.a6.v1	Glyma.20G172200.Wm82.a6.v1	0
5412-386:	Glyma.10G219600.Wm82.a6.v1	Glyma.20G172100.Wm82.a6.v1	0
5412-387:	Glyma.10G219700.Wm82.a6.v1	Glyma.20G172000.Wm82.a6.v1	0
5412-388:	Glyma.10G219800.Wm82.a6.v1	Glyma.20G171900.Wm82.a6.v1	0
5412-389:	Glyma.10G219900.Wm82.a6.v1	Glyma.20G171800.Wm82.a6.v1	0
5412-390:	Glyma.10G220000.Wm82.a6.v1	Glyma.20G171700.Wm82.a6.v1	0
5412-391:	Glyma.10G220100.Wm82.a6.v1	Glyma.20G171600.Wm82.a6.v1	2e-156
5412-392:	Glyma.10G220600.Wm82.a6.v1	Glyma.20G171000.Wm82.a6.v1	4e-103
5412-393:	Glyma.10G220700.Wm82.a6.v1	Glyma.20G170900.Wm82.a6.v1	0
5412-394:	Glyma.10G220800.Wm82.a6.v1	Glyma.20G170700.Wm82.a6.v1	3e-155
5412-395:	Glyma.10G220900.Wm82.a6.v1	Glyma.20G170600.Wm82.a6.v1	0
5412-396:	Glyma.10G221000.Wm82.a6.v1	Glyma.20G170500.Wm82.a6.v1	0
5412-397:	Glyma.10G221100.Wm82.a6.v1	Glyma.20G170400.Wm82.a6.v1	0
5412-398:	Glyma.10G221200.Wm82.a6.v1	Glyma.20G170300.Wm82.a6.v1	0
5412-399:	Glyma.10G221300.Wm82.a6.v1	Glyma.20G170250.Wm82.a6.v1	7e-99
5412-400:	Glyma.10G221400.Wm82.a6.v1	Glyma.20G170200.Wm82.a6.v1	0
5412-401:	Glyma.10G221500.Wm82.a6.v1	Glyma.20G170000.Wm82.a6.v1	0
5412-402:	Glyma.10G221600.Wm82.a6.v1	Glyma.20G169900.Wm82.a6.v1	3e-111
5412-403:	Glyma.10G221800.Wm82.a6.v1	Glyma.20G169800.Wm82.a6.v1	8e-53
5412-404:	Glyma.10G221900.Wm82.a6.v1	Glyma.20G169600.Wm82.a6.v1	2e-148
5412-405:	Glyma.10G222100.Wm82.a6.v1	Glyma.20G169500.Wm82.a6.v1	2e-120
5412-406:	Glyma.10G222300.Wm82.a6.v1	Glyma.20G169300.Wm82.a6.v1	1e-57
5412-407:	Glyma.10G222800.Wm82.a6.v1	Glyma.20G168900.Wm82.a6.v1	0
5412-408:	Glyma.10G222900.Wm82.a6.v1	Glyma.20G168800.Wm82.a6.v1	0
5412-409:	Glyma.10G223000.Wm82.a6.v1	Glyma.20G168700.Wm82.a6.v1	2e-105
5412-410:	Glyma.10G223200.Wm82.a6.v1	Glyma.20G168500.Wm82.a6.v1	6e-98
5412-411:	Glyma.10G223300.Wm82.a6.v1	Glyma.20G168400.Wm82.a6.v1	0
5412-412:	Glyma.10G223433.Wm82.a6.v1	Glyma.20G168100.Wm82.a6.v1	0
5412-413:	Glyma.10G223700.Wm82.a6.v1	Glyma.20G168200.Wm82.a6.v1	2e-144
5412-414:	Glyma.10G223800.Wm82.a6.v1	Glyma.20G168102.Wm82.a6.v1	4e-145
5412-415:	Glyma.10G224000.Wm82.a6.v1	Glyma.20G167900.Wm82.a6.v1	0
5412-416:	Glyma.10G224051.Wm82.a6.v1	Glyma.20G167800.Wm82.a6.v1	0
5412-417:	Glyma.10G224100.Wm82.a6.v1	Glyma.20G167700.Wm82.a6.v1	8e-103
5412-418:	Glyma.10G224200.Wm82.a6.v1	Glyma.20G167600.Wm82.a6.v1	6e-109
5412-419:	Glyma.10G224300.Wm82.a6.v1	Glyma.20G167500.Wm82.a6.v1	1e-85
5412-420:	Glyma.10G224400.Wm82.a6.v1	Glyma.20G167400.Wm82.a6.v1	6e-134
5412-421:	Glyma.10G224500.Wm82.a6.v1	Glyma.20G167300.Wm82.a6.v1	0
5412-422:	Glyma.10G224900.Wm82.a6.v1	Glyma.20G166900.Wm82.a6.v1	0
5412-423:	Glyma.10G225050.Wm82.a6.v1	Glyma.20G166600.Wm82.a6.v1	2e-153
5412-424:	Glyma.10G225300.Wm82.a6.v1	Glyma.20G166500.Wm82.a6.v1	0
5412-425:	Glyma.10G225400.Wm82.a6.v1	Glyma.20G166400.Wm82.a6.v1	0
5412-426:	Glyma.10G225500.Wm82.a6.v1	Glyma.20G166300.Wm82.a6.v1	0
5412-427:	Glyma.10G225800.Wm82.a6.v1	Glyma.20G166200.Wm82.a6.v1	0
5412-428:	Glyma.10G225900.Wm82.a6.v1	Glyma.20G166100.Wm82.a6.v1	2e-144
5412-429:	Glyma.10G226000.Wm82.a6.v1	Glyma.20G165966.Wm82.a6.v1	6e-27
5412-430:	Glyma.10G226300.Wm82.a6.v1	Glyma.20G165767.Wm82.a6.v1	9e-135
5412-431:	Glyma.10G226600.Wm82.a6.v1	Glyma.20G165600.Wm82.a6.v1	1e-172
5412-432:	Glyma.10G226800.Wm82.a6.v1	Glyma.20G165500.Wm82.a6.v1	1e-45
5412-433:	Glyma.10G226900.Wm82.a6.v1	Glyma.20G165400.Wm82.a6.v1	0
5412-434:	Glyma.10G227100.Wm82.a6.v1	Glyma.20G165200.Wm82.a6.v1	0
5412-435:	Glyma.10G227300.Wm82.a6.v1	Glyma.20G165000.Wm82.a6.v1	0
5412-436:	Glyma.10G227700.Wm82.a6.v1	Glyma.20G164600.Wm82.a6.v1	0
5412-437:	Glyma.10G227800.Wm82.a6.v1	Glyma.20G164500.Wm82.a6.v1	0
5412-438:	Glyma.10G228400.Wm82.a6.v1	Glyma.20G164400.Wm82.a6.v1	1e-98
5412-439:	Glyma.10G228700.Wm82.a6.v1	Glyma.20G164300.Wm82.a6.v1	0
5412-440:	Glyma.10G228900.Wm82.a6.v1	Glyma.20G164200.Wm82.a6.v1	0
5412-441:	Glyma.10G229000.Wm82.a6.v1	Glyma.20G164100.Wm82.a6.v1	0
5412-442:	Glyma.10G229200.Wm82.a6.v1	Glyma.20G164000.Wm82.a6.v1	1e-152
5412-443:	Glyma.10G229400.Wm82.a6.v1	Glyma.20G163900.Wm82.a6.v1	0
5412-444:	Glyma.10G229600.Wm82.a6.v1	Glyma.20G163700.Wm82.a6.v1	6e-179
5412-445:	Glyma.10G229700.Wm82.a6.v1	Glyma.20G163600.Wm82.a6.v1	0
5412-446:	Glyma.10G229800.Wm82.a6.v1	Glyma.20G163500.Wm82.a6.v1	0
5412-447:	Glyma.10G229900.Wm82.a6.v1	Glyma.20G163400.Wm82.a6.v1	0
5412-448:	Glyma.10G230000.Wm82.a6.v1	Glyma.20G163351.Wm82.a6.v1	5e-24
5412-449:	Glyma.10G230100.Wm82.a6.v1	Glyma.20G163300.Wm82.a6.v1	0
5412-450:	Glyma.10G230200.Wm82.a6.v1	Glyma.20G163200.Wm82.a6.v1	2e-157
5412-451:	Glyma.10G230301.Wm82.a6.v1	Glyma.20G163100.Wm82.a6.v1	6e-59
5412-452:	Glyma.10G230400.Wm82.a6.v1	Glyma.20G163000.Wm82.a6.v1	2e-145
5412-453:	Glyma.10G230500.Wm82.a6.v1	Glyma.20G162900.Wm82.a6.v1	1e-60
5412-454:	Glyma.10G230700.Wm82.a6.v1	Glyma.20G162800.Wm82.a6.v1	0
5412-455:	Glyma.10G230800.Wm82.a6.v1	Glyma.20G162751.Wm82.a6.v1	0
5412-456:	Glyma.10G230900.Wm82.a6.v1	Glyma.20G162700.Wm82.a6.v1	4e-84
5412-457:	Glyma.10G231200.Wm82.a6.v1	Glyma.20G162600.Wm82.a6.v1	0
5412-458:	Glyma.10G231300.Wm82.a6.v1	Glyma.20G162500.Wm82.a6.v1	9e-120
5412-459:	Glyma.10G231500.Wm82.a6.v1	Glyma.20G162300.Wm82.a6.v1	0
5412-460:	Glyma.10G231900.Wm82.a6.v1	Glyma.20G162200.Wm82.a6.v1	2e-168
5412-461:	Glyma.10G232300.Wm82.a6.v1	Glyma.20G161800.Wm82.a6.v1	0
5412-462:	Glyma.10G232400.Wm82.a6.v1	Glyma.20G161700.Wm82.a6.v1	4e-161
5412-463:	Glyma.10G232700.Wm82.a6.v1	Glyma.20G161600.Wm82.a6.v1	6e-136
5412-464:	Glyma.10G232800.Wm82.a6.v1	Glyma.20G161500.Wm82.a6.v1	0
5412-465:	Glyma.10G233000.Wm82.a6.v1	Glyma.20G161400.Wm82.a6.v1	6e-76
5412-466:	Glyma.10G233100.Wm82.a6.v1	Glyma.20G161200.Wm82.a6.v1	0
5412-467:	Glyma.10G233300.Wm82.a6.v1	Glyma.20G161100.Wm82.a6.v1	5e-180
5412-468:	Glyma.10G233400.Wm82.a6.v1	Glyma.20G161000.Wm82.a6.v1	0
5412-469:	Glyma.10G233500.Wm82.a6.v1	Glyma.20G160900.Wm82.a6.v1	0
5412-470:	Glyma.10G233600.Wm82.a6.v1	Glyma.20G160800.Wm82.a6.v1	0
5412-471:	Glyma.10G233800.Wm82.a6.v1	Glyma.20G160600.Wm82.a6.v1	1e-60
5412-472:	Glyma.10G233900.Wm82.a6.v1	Glyma.20G160400.Wm82.a6.v1	2e-73
5412-473:	Glyma.10G234000.Wm82.a6.v1	Glyma.20G160251.Wm82.a6.v1	1e-103
5412-474:	Glyma.10G234100.Wm82.a6.v1	Glyma.20G160200.Wm82.a6.v1	0
5412-475:	Glyma.10G234200.Wm82.a6.v1	Glyma.20G160100.Wm82.a6.v1	0
5412-476:	Glyma.10G234400.Wm82.a6.v1	Glyma.20G159900.Wm82.a6.v1	0
5412-477:	Glyma.10G234500.Wm82.a6.v1	Glyma.20G159801.Wm82.a6.v1	2e-52
5412-478:	Glyma.10G234600.Wm82.a6.v1	Glyma.20G159600.Wm82.a6.v1	0
5412-479:	Glyma.10G234800.Wm82.a6.v1	Glyma.20G159500.Wm82.a6.v1	0
5412-480:	Glyma.10G235000.Wm82.a6.v1	Glyma.20G159400.Wm82.a6.v1	3e-135
5412-481:	Glyma.10G235100.Wm82.a6.v1	Glyma.20G159200.Wm82.a6.v1	0
5412-482:	Glyma.10G235200.Wm82.a6.v1	Glyma.20G159000.Wm82.a6.v1	6e-15
5412-483:	Glyma.10G235500.Wm82.a6.v1	Glyma.20G158900.Wm82.a6.v1	2e-99
5412-484:	Glyma.10G235600.Wm82.a6.v1	Glyma.20G158700.Wm82.a6.v1	1e-61
5412-485:	Glyma.10G235900.Wm82.a6.v1	Glyma.20G158600.Wm82.a6.v1	0
5412-486:	Glyma.10G236000.Wm82.a6.v1	Glyma.20G158500.Wm82.a6.v1	0
5412-487:	Glyma.10G236100.Wm82.a6.v1	Glyma.20G158400.Wm82.a6.v1	0
5412-488:	Glyma.10G236200.Wm82.a6.v1	Glyma.20G158300.Wm82.a6.v1	4e-157
5412-489:	Glyma.10G236300.Wm82.a6.v1	Glyma.20G158200.Wm82.a6.v1	2e-120
5412-490:	Glyma.10G236702.Wm82.a6.v1	Glyma.20G157800.Wm82.a6.v1	3e-149
5412-491:	Glyma.10G236802.Wm82.a6.v1	Glyma.20G157600.Wm82.a6.v1	6e-90
5412-492:	Glyma.10G236900.Wm82.a6.v1	Glyma.20G157500.Wm82.a6.v1	0
5412-493:	Glyma.10G237000.Wm82.a6.v1	Glyma.20G157300.Wm82.a6.v1	8e-141
5412-494:	Glyma.10G237400.Wm82.a6.v1	Glyma.20G157200.Wm82.a6.v1	3e-86
5412-495:	Glyma.10G237500.Wm82.a6.v1	Glyma.20G157100.Wm82.a6.v1	3e-131
5412-496:	Glyma.10G237600.Wm82.a6.v1	Glyma.20G157001.Wm82.a6.v1	5e-48
5412-497:	Glyma.10G237700.Wm82.a6.v1	Glyma.20G156900.Wm82.a6.v1	0
5412-498:	Glyma.10G237800.Wm82.a6.v1	Glyma.20G156800.Wm82.a6.v1	0
5412-499:	Glyma.10G237900.Wm82.a6.v1	Glyma.20G156700.Wm82.a6.v1	0
5412-500:	Glyma.10G238000.Wm82.a6.v1	Glyma.20G156600.Wm82.a6.v1	0
5412-501:	Glyma.10G238100.Wm82.a6.v1	Glyma.20G156500.Wm82.a6.v1	0
5412-502:	Glyma.10G238200.Wm82.a6.v1	Glyma.20G156400.Wm82.a6.v1	0
5412-503:	Glyma.10G238300.Wm82.a6.v1	Glyma.20G156200.Wm82.a6.v1	0
5412-504:	Glyma.10G238500.Wm82.a6.v1	Glyma.20G156133.Wm82.a6.v1	3e-160
5412-505:	Glyma.10G238600.Wm82.a6.v1	Glyma.20G155900.Wm82.a6.v1	6e-97
5412-506:	Glyma.10G238700.Wm82.a6.v1	Glyma.20G155700.Wm82.a6.v1	0
5412-507:	Glyma.10G238800.Wm82.a6.v1	Glyma.20G155600.Wm82.a6.v1	0
5412-508:	Glyma.10G239000.Wm82.a6.v1	Glyma.20G155500.Wm82.a6.v1	0
5412-509:	Glyma.10G239100.Wm82.a6.v1	Glyma.20G155400.Wm82.a6.v1	0
5412-510:	Glyma.10G239200.Wm82.a6.v1	Glyma.20G155300.Wm82.a6.v1	8e-42
5412-511:	Glyma.10G239300.Wm82.a6.v1	Glyma.20G155100.Wm82.a6.v1	2e-23
5412-512:	Glyma.10G239500.Wm82.a6.v1	Glyma.20G155000.Wm82.a6.v1	6e-150
5412-513:	Glyma.10G239700.Wm82.a6.v1	Glyma.20G154900.Wm82.a6.v1	4e-65
5412-514:	Glyma.10G239750.Wm82.a6.v1	Glyma.20G154800.Wm82.a6.v1	0
5412-515:	Glyma.10G239900.Wm82.a6.v1	Glyma.20G154700.Wm82.a6.v1	0
5412-516:	Glyma.10G240000.Wm82.a6.v1	Glyma.20G154600.Wm82.a6.v1	0
5412-517:	Glyma.10G240200.Wm82.a6.v1	Glyma.20G154400.Wm82.a6.v1	5e-175
5412-518:	Glyma.10G240400.Wm82.a6.v1	Glyma.20G154300.Wm82.a6.v1	3e-132
5412-519:	Glyma.10G240600.Wm82.a6.v1	Glyma.20G154100.Wm82.a6.v1	0
5412-520:	Glyma.10G240700.Wm82.a6.v1	Glyma.20G154000.Wm82.a6.v1	8e-179
5412-521:	Glyma.10G240800.Wm82.a6.v1	Glyma.20G153900.Wm82.a6.v1	0
5412-522:	Glyma.10G241000.Wm82.a6.v1	Glyma.20G153600.Wm82.a6.v1	0
5412-523:	Glyma.10G241100.Wm82.a6.v1	Glyma.20G153400.Wm82.a6.v1	0
5412-524:	Glyma.10G241200.Wm82.a6.v1	Glyma.20G153100.Wm82.a6.v1	0
5412-525:	Glyma.10G241300.Wm82.a6.v1	Glyma.20G152900.Wm82.a6.v1	1e-43
5412-526:	Glyma.10G241500.Wm82.a6.v1	Glyma.20G152800.Wm82.a6.v1	0
5412-527:	Glyma.10G241600.Wm82.a6.v1	Glyma.20G152600.Wm82.a6.v1	0
5412-528:	Glyma.10G241700.Wm82.a6.v1	Glyma.20G152500.Wm82.a6.v1	0
5412-529:	Glyma.10G241800.Wm82.a6.v1	Glyma.20G152400.Wm82.a6.v1	0
5412-530:	Glyma.10G241900.Wm82.a6.v1	Glyma.20G152200.Wm82.a6.v1	0
5412-531:	Glyma.10G242000.Wm82.a6.v1	Glyma.20G152100.Wm82.a6.v1	9e-131
5412-532:	Glyma.10G242101.Wm82.a6.v1	Glyma.20G152000.Wm82.a6.v1	0
5412-533:	Glyma.10G242200.Wm82.a6.v1	Glyma.20G151900.Wm82.a6.v1	1e-159
5412-534:	Glyma.10G242400.Wm82.a6.v1	Glyma.20G151700.Wm82.a6.v1	5e-180
5412-535:	Glyma.10G242500.Wm82.a6.v1	Glyma.20G151600.Wm82.a6.v1	4e-146
5412-536:	Glyma.10G242600.Wm82.a6.v1	Glyma.20G151500.Wm82.a6.v1	0
5412-537:	Glyma.10G242800.Wm82.a6.v1	Glyma.20G151400.Wm82.a6.v1	0
5412-538:	Glyma.10G243100.Wm82.a6.v1	Glyma.20G151100.Wm82.a6.v1	0
5412-539:	Glyma.10G243200.Wm82.a6.v1	Glyma.20G151001.Wm82.a6.v1	3e-32
5412-540:	Glyma.10G243300.Wm82.a6.v1	Glyma.20G150900.Wm82.a6.v1	0
5412-541:	Glyma.10G243400.Wm82.a6.v1	Glyma.20G150800.Wm82.a6.v1	0
5412-542:	Glyma.10G243500.Wm82.a6.v1	Glyma.20G150700.Wm82.a6.v1	6e-154
5412-543:	Glyma.10G243800.Wm82.a6.v1	Glyma.20G150600.Wm82.a6.v1	1e-125
5412-544:	Glyma.10G243900.Wm82.a6.v1	Glyma.20G150500.Wm82.a6.v1	0
5412-545:	Glyma.10G244000.Wm82.a6.v1	Glyma.20G150300.Wm82.a6.v1	0
5412-546:	Glyma.10G244100.Wm82.a6.v1	Glyma.20G150100.Wm82.a6.v1	6e-85
5412-547:	Glyma.10G244400.Wm82.a6.v1	Glyma.20G150000.Wm82.a6.v1	0
5412-548:	Glyma.10G244500.Wm82.a6.v1	Glyma.20G149900.Wm82.a6.v1	6e-73
5412-549:	Glyma.10G244600.Wm82.a6.v1	Glyma.20G149800.Wm82.a6.v1	0
5412-550:	Glyma.10G244900.Wm82.a6.v1	Glyma.20G149700.Wm82.a6.v1	1e-104
5412-551:	Glyma.10G245000.Wm82.a6.v1	Glyma.20G149600.Wm82.a6.v1	0
5412-552:	Glyma.10G245100.Wm82.a6.v1	Glyma.20G149500.Wm82.a6.v1	0
5412-553:	Glyma.10G245200.Wm82.a6.v1	Glyma.20G149400.Wm82.a6.v1	0
5412-554:	Glyma.10G245300.Wm82.a6.v1	Glyma.20G149301.Wm82.a6.v1	8e-45
5412-555:	Glyma.10G245400.Wm82.a6.v1	Glyma.20G149200.Wm82.a6.v1	0
5412-556:	Glyma.10G245500.Wm82.a6.v1	Glyma.20G149100.Wm82.a6.v1	0
5412-557:	Glyma.10G245600.Wm82.a6.v1	Glyma.20G149000.Wm82.a6.v1	6e-69
5412-558:	Glyma.10G246000.Wm82.a6.v1	Glyma.20G148600.Wm82.a6.v1	0
5412-559:	Glyma.10G246200.Wm82.a6.v1	Glyma.20G148500.Wm82.a6.v1	0
5412-560:	Glyma.10G246300.Wm82.a6.v1	Glyma.20G148200.Wm82.a6.v1	0
5412-561:	Glyma.10G248000.Wm82.a6.v1	Glyma.20G146100.Wm82.a6.v1	0
5412-562:	Glyma.10G248100.Wm82.a6.v1	Glyma.20G146000.Wm82.a6.v1	0
5412-563:	Glyma.10G248400.Wm82.a6.v1	Glyma.20G145800.Wm82.a6.v1	0
5412-564:	Glyma.10G248500.Wm82.a6.v1	Glyma.20G145600.Wm82.a6.v1	3e-40
5412-565:	Glyma.10G248600.Wm82.a6.v1	Glyma.20G145500.Wm82.a6.v1	0
5412-566:	Glyma.10G248700.Wm82.a6.v1	Glyma.20G145100.Wm82.a6.v1	0
5412-567:	Glyma.10G248800.Wm82.a6.v1	Glyma.20G145000.Wm82.a6.v1	0
5412-568:	Glyma.10G248900.Wm82.a6.v1	Glyma.20G144800.Wm82.a6.v1	8e-170
5412-569:	Glyma.10G249000.Wm82.a6.v1	Glyma.20G144700.Wm82.a6.v1	6e-142
5412-570:	Glyma.10G249150.Wm82.a6.v1	Glyma.20G144600.Wm82.a6.v1	0
5412-571:	Glyma.10G249300.Wm82.a6.v1	Glyma.20G144400.Wm82.a6.v1	0
5412-572:	Glyma.10G249400.Wm82.a6.v1	Glyma.20G144150.Wm82.a6.v1	7e-51
5412-573:	Glyma.10G249600.Wm82.a6.v1	Glyma.20G144000.Wm82.a6.v1	3e-119
5412-574:	Glyma.10G249700.Wm82.a6.v1	Glyma.20G143900.Wm82.a6.v1	0
5412-575:	Glyma.10G249800.Wm82.a6.v1	Glyma.20G143800.Wm82.a6.v1	0
5412-576:	Glyma.10G249900.Wm82.a6.v1	Glyma.20G143700.Wm82.a6.v1	9e-129
5412-577:	Glyma.10G250000.Wm82.a6.v1	Glyma.20G143600.Wm82.a6.v1	0
5412-578:	Glyma.10G250100.Wm82.a6.v1	Glyma.20G143500.Wm82.a6.v1	0
5412-579:	Glyma.10G250200.Wm82.a6.v1	Glyma.20G143350.Wm82.a6.v1	2e-17
5412-580:	Glyma.10G250400.Wm82.a6.v1	Glyma.20G143300.Wm82.a6.v1	0
5412-581:	Glyma.10G250500.Wm82.a6.v1	Glyma.20G143200.Wm82.a6.v1	0
5412-582:	Glyma.10G250600.Wm82.a6.v1	Glyma.20G143100.Wm82.a6.v1	0
5412-583:	Glyma.10G250700.Wm82.a6.v1	Glyma.20G143000.Wm82.a6.v1	0
5412-584:	Glyma.10G250800.Wm82.a6.v1	Glyma.20G142900.Wm82.a6.v1	0
5412-585:	Glyma.10G250900.Wm82.a6.v1	Glyma.20G142800.Wm82.a6.v1	9e-56
5412-586:	Glyma.10G251000.Wm82.a6.v1	Glyma.20G142700.Wm82.a6.v1	5e-120
5412-587:	Glyma.10G251050.Wm82.a6.v1	Glyma.20G142600.Wm82.a6.v1	1e-119
5412-588:	Glyma.10G251100.Wm82.a6.v1	Glyma.20G142300.Wm82.a6.v1	2e-45
5412-589:	Glyma.10G251300.Wm82.a6.v1	Glyma.20G142200.Wm82.a6.v1	0
5412-590:	Glyma.10G251400.Wm82.a6.v1	Glyma.20G142100.Wm82.a6.v1	3e-92
5412-591:	Glyma.10G251500.Wm82.a6.v1	Glyma.20G142000.Wm82.a6.v1	0
5412-592:	Glyma.10G251600.Wm82.a6.v1	Glyma.20G141900.Wm82.a6.v1	0
5412-593:	Glyma.10G251700.Wm82.a6.v1	Glyma.20G141800.Wm82.a6.v1	0
5412-594:	Glyma.10G251800.Wm82.a6.v1	Glyma.20G141700.Wm82.a6.v1	1e-67
5412-595:	Glyma.10G251900.Wm82.a6.v1	Glyma.20G141600.Wm82.a6.v1	0
5412-596:	Glyma.10G252200.Wm82.a6.v1	Glyma.20G141300.Wm82.a6.v1	0
5412-597:	Glyma.10G252300.Wm82.a6.v1	Glyma.20G141100.Wm82.a6.v1	0
5412-598:	Glyma.10G252400.Wm82.a6.v1	Glyma.20G141000.Wm82.a6.v1	8e-148
5412-599:	Glyma.10G252500.Wm82.a6.v1	Glyma.20G140900.Wm82.a6.v1	2e-167
## Alignment 5418: score=480.0 e_value=8.3e-14 N=12 Gm10&Gm20 minus
5418- 0:	Glyma.10G059700.Wm82.a6.v1	Glyma.20G193000.Wm82.a6.v1	7e-50
5418- 1:	Glyma.10G059900.Wm82.a6.v1	Glyma.20G192600.Wm82.a6.v1	6e-105
5418- 2:	Glyma.10G062800.Wm82.a6.v1	Glyma.20G191300.Wm82.a6.v1	1e-17
5418- 3:	Glyma.10G062900.Wm82.a6.v1	Glyma.20G189600.Wm82.a6.v1	9e-22
5418- 4:	Glyma.10G065000.Wm82.a6.v1	Glyma.20G189300.Wm82.a6.v1	0
5418- 5:	Glyma.10G065100.Wm82.a6.v1	Glyma.20G189033.Wm82.a6.v1	6e-88
5418- 6:	Glyma.10G065600.Wm82.a6.v1	Glyma.20G188600.Wm82.a6.v1	0
5418- 7:	Glyma.10G065900.Wm82.a6.v1	Glyma.20G188300.Wm82.a6.v1	0
5418- 8:	Glyma.10G066000.Wm82.a6.v1	Glyma.20G187200.Wm82.a6.v1	2e-08
5418- 9:	Glyma.10G066900.Wm82.a6.v1	Glyma.20G186200.Wm82.a6.v1	4e-09
5418- 10:	Glyma.10G069500.Wm82.a6.v1	Glyma.20G185100.Wm82.a6.v1	4e-19
5418- 11:	Glyma.10G069600.Wm82.a6.v1	Glyma.20G182400.Wm82.a6.v1	6e-46
## Alignment 6344: score=390.0 e_value=1.3e-12 N=10 Gm13&Gm20 minus
6344- 0:	Glyma.13G146400.Wm82.a6.v1	Glyma.20G193000.Wm82.a6.v1	2e-54
6344- 1:	Glyma.13G146600.Wm82.a6.v1	Glyma.20G192600.Wm82.a6.v1	1e-104
6344- 2:	Glyma.13G147300.Wm82.a6.v1	Glyma.20G191300.Wm82.a6.v1	8e-18
6344- 3:	Glyma.13G147500.Wm82.a6.v1	Glyma.20G189600.Wm82.a6.v1	5e-21
6344- 4:	Glyma.13G149800.Wm82.a6.v1	Glyma.20G189300.Wm82.a6.v1	0
6344- 5:	Glyma.13G150700.Wm82.a6.v1	Glyma.20G188600.Wm82.a6.v1	0
6344- 6:	Glyma.13G151000.Wm82.a6.v1	Glyma.20G188300.Wm82.a6.v1	8e-53
6344- 7:	Glyma.13G151100.Wm82.a6.v1	Glyma.20G187200.Wm82.a6.v1	6e-08
6344- 8:	Glyma.13G152542.Wm82.a6.v1	Glyma.20G185100.Wm82.a6.v1	1e-20
6344- 9:	Glyma.13G152610.Wm82.a6.v1	Glyma.20G182400.Wm82.a6.v1	1e-45

## Sheet: Table S4
MCScanX gene classifier data
Gene	Classifer	Duplication Type
Glyma.01G000900.Wm82.a6.v1	4	segmental/WGD
Glyma.01G001000.Wm82.a6.v1	4	segmental/WGD
Glyma.01G001100.Wm82.a6.v1	4	segmental/WGD
Glyma.01G001300.Wm82.a6.v1	4	segmental/WGD
Glyma.01G001600.Wm82.a6.v1	4	segmental/WGD
Glyma.01G001800.Wm82.a6.v1	4	segmental/WGD
Glyma.01G001900.Wm82.a6.v1	4	segmental/WGD
Glyma.01G002000.Wm82.a6.v1	4	segmental/WGD
Glyma.01G002100.Wm82.a6.v1	4	segmental/WGD
Glyma.01G002200.Wm82.a6.v1	4	segmental/WGD
Glyma.01G002300.Wm82.a6.v1	4	segmental/WGD
Glyma.01G002400.Wm82.a6.v1	4	segmental/WGD
Glyma.01G002501.Wm82.a6.v1	4	segmental/WGD
Glyma.01G002600.Wm82.a6.v1	4	segmental/WGD
Glyma.01G002700.Wm82.a6.v1	4	segmental/WGD
Glyma.01G002800.Wm82.a6.v1	4	segmental/WGD
Glyma.01G002902.Wm82.a6.v1	4	segmental/WGD
Glyma.01G003000.Wm82.a6.v1	4	segmental/WGD
Glyma.01G003100.Wm82.a6.v1	4	segmental/WGD
Glyma.01G003200.Wm82.a6.v1	4	segmental/WGD
Glyma.01G003300.Wm82.a6.v1	4	segmental/WGD
Glyma.01G003400.Wm82.a6.v1	4	segmental/WGD
Glyma.01G003450.Wm82.a6.v1	4	segmental/WGD
Glyma.01G003500.Wm82.a6.v1	4	segmental/WGD
Glyma.01G003600.Wm82.a6.v1	4	segmental/WGD
Glyma.01G003700.Wm82.a6.v1	4	segmental/WGD
Glyma.01G003800.Wm82.a6.v1	4	segmental/WGD
Glyma.01G003900.Wm82.a6.v1	4	segmental/WGD
Glyma.01G004000.Wm82.a6.v1	4	segmental/WGD
Glyma.01G004100.Wm82.a6.v1	4	segmental/WGD
Glyma.01G004200.Wm82.a6.v1	4	segmental/WGD
Glyma.01G004300.Wm82.a6.v1	4	segmental/WGD
Glyma.01G004401.Wm82.a6.v1	4	segmental/WGD
Glyma.01G004500.Wm82.a6.v1	4	segmental/WGD
Glyma.01G004600.Wm82.a6.v1	4	segmental/WGD
Glyma.01G004800.Wm82.a6.v1	4	segmental/WGD
Glyma.01G004900.Wm82.a6.v1	4	segmental/WGD
Glyma.01G005000.Wm82.a6.v1	4	segmental/WGD
Glyma.01G005100.Wm82.a6.v1	4	segmental/WGD
Glyma.01G005300.Wm82.a6.v1	4	segmental/WGD
Glyma.01G005400.Wm82.a6.v1	4	segmental/WGD
Glyma.01G005500.Wm82.a6.v1	4	segmental/WGD
Glyma.01G005600.Wm82.a6.v1	4	segmental/WGD
Glyma.01G005800.Wm82.a6.v1	4	segmental/WGD
Glyma.01G005900.Wm82.a6.v1	4	segmental/WGD
Glyma.01G006000.Wm82.a6.v1	4	segmental/WGD
Glyma.01G006100.Wm82.a6.v1	4	segmental/WGD
Glyma.01G006500.Wm82.a6.v1	4	segmental/WGD
Glyma.01G006600.Wm82.a6.v1	4	segmental/WGD
Glyma.01G006700.Wm82.a6.v1	4	segmental/WGD
Glyma.01G006800.Wm82.a6.v1	4	segmental/WGD
Glyma.01G007000.Wm82.a6.v1	4	segmental/WGD
Glyma.01G007100.Wm82.a6.v1	4	segmental/WGD
Glyma.01G007200.Wm82.a6.v1	4	segmental/WGD
Glyma.01G007400.Wm82.a6.v1	4	segmental/WGD
Glyma.01G007500.Wm82.a6.v1	4	segmental/WGD
Glyma.01G007700.Wm82.a6.v1	4	segmental/WGD
Glyma.01G007900.Wm82.a6.v1	4	segmental/WGD
Glyma.01G008000.Wm82.a6.v1	4	segmental/WGD
Glyma.01G008100.Wm82.a6.v1	4	segmental/WGD
Glyma.01G008200.Wm82.a6.v1	4	segmental/WGD
Glyma.01G008300.Wm82.a6.v1	4	segmental/WGD
Glyma.01G008400.Wm82.a6.v1	4	segmental/WGD
Glyma.01G008500.Wm82.a6.v1	4	segmental/WGD
Glyma.01G008600.Wm82.a6.v1	4	segmental/WGD
Glyma.01G008800.Wm82.a6.v1	4	segmental/WGD
Glyma.01G008900.Wm82.a6.v1	4	segmental/WGD
Glyma.01G009000.Wm82.a6.v1	4	segmental/WGD
Glyma.01G009200.Wm82.a6.v1	4	segmental/WGD
Glyma.01G009300.Wm82.a6.v1	4	segmental/WGD
Glyma.01G009400.Wm82.a6.v1	4	segmental/WGD
Glyma.01G009500.Wm82.a6.v1	4	segmental/WGD
Glyma.01G009600.Wm82.a6.v1	4	segmental/WGD
Glyma.01G009800.Wm82.a6.v1	4	segmental/WGD
Glyma.01G009900.Wm82.a6.v1	4	segmental/WGD
Glyma.01G010000.Wm82.a6.v1	4	segmental/WGD
Glyma.01G010100.Wm82.a6.v1	4	segmental/WGD
Glyma.01G010200.Wm82.a6.v1	4	segmental/WGD
Glyma.01G010300.Wm82.a6.v1	4	segmental/WGD
Glyma.01G010400.Wm82.a6.v1	4	segmental/WGD
Glyma.01G010500.Wm82.a6.v1	4	segmental/WGD
Glyma.01G010700.Wm82.a6.v1	4	segmental/WGD
Glyma.01G010800.Wm82.a6.v1	4	segmental/WGD
Glyma.01G010900.Wm82.a6.v1	4	segmental/WGD
Glyma.01G011100.Wm82.a6.v1	4	segmental/WGD
Glyma.01G011200.Wm82.a6.v1	4	segmental/WGD
Glyma.01G011300.Wm82.a6.v1	4	segmental/WGD
Glyma.01G011400.Wm82.a6.v1	4	segmental/WGD
Glyma.01G011500.Wm82.a6.v1	4	segmental/WGD
Glyma.01G011700.Wm82.a6.v1	4	segmental/WGD
Glyma.01G012000.Wm82.a6.v1	4	segmental/WGD
Glyma.01G012300.Wm82.a6.v1	4	segmental/WGD
Glyma.01G012400.Wm82.a6.v1	4	segmental/WGD
Glyma.01G012500.Wm82.a6.v1	4	segmental/WGD
Glyma.01G012800.Wm82.a6.v1	4	segmental/WGD
Glyma.01G013000.Wm82.a6.v1	4	segmental/WGD
Glyma.01G013100.Wm82.a6.v1	4	segmental/WGD
Glyma.01G013500.Wm82.a6.v1	4	segmental/WGD
Glyma.01G013600.Wm82.a6.v1	4	segmental/WGD
Glyma.01G013800.Wm82.a6.v1	4	segmental/WGD
Glyma.01G013900.Wm82.a6.v1	4	segmental/WGD
Glyma.01G014000.Wm82.a6.v1	4	segmental/WGD
Glyma.01G014100.Wm82.a6.v1	4	segmental/WGD
Glyma.01G014200.Wm82.a6.v1	4	segmental/WGD
Glyma.01G014301.Wm82.a6.v1	4	segmental/WGD
Glyma.01G014400.Wm82.a6.v1	4	segmental/WGD
Glyma.01G014500.Wm82.a6.v1	4	segmental/WGD
Glyma.01G014600.Wm82.a6.v1	4	segmental/WGD
Glyma.01G014700.Wm82.a6.v1	4	segmental/WGD
Glyma.01G014800.Wm82.a6.v1	4	segmental/WGD
Glyma.01G015000.Wm82.a6.v1	4	segmental/WGD
Glyma.01G015100.Wm82.a6.v1	4	segmental/WGD
Glyma.01G015250.Wm82.a6.v1	4	segmental/WGD
Glyma.01G015400.Wm82.a6.v1	4	segmental/WGD
Glyma.01G015500.Wm82.a6.v1	4	segmental/WGD
Glyma.01G015600.Wm82.a6.v1	4	segmental/WGD
Glyma.01G015700.Wm82.a6.v1	4	segmental/WGD
Glyma.01G015800.Wm82.a6.v1	4	segmental/WGD
Glyma.01G015900.Wm82.a6.v1	4	segmental/WGD
Glyma.01G016100.Wm82.a6.v1	4	segmental/WGD
Glyma.01G016300.Wm82.a6.v1	4	segmental/WGD
Glyma.01G016400.Wm82.a6.v1	4	segmental/WGD
Glyma.01G016500.Wm82.a6.v1	4	segmental/WGD
Glyma.01G016600.Wm82.a6.v1	4	segmental/WGD
Glyma.01G016700.Wm82.a6.v1	4	segmental/WGD
Glyma.01G016800.Wm82.a6.v1	4	segmental/WGD
Glyma.01G016900.Wm82.a6.v1	4	segmental/WGD
Glyma.01G017000.Wm82.a6.v1	4	segmental/WGD
Glyma.01G017100.Wm82.a6.v1	4	segmental/WGD
Glyma.01G017150.Wm82.a6.v1	4	segmental/WGD
Glyma.01G017200.Wm82.a6.v1	4	segmental/WGD
Glyma.01G017300.Wm82.a6.v1	4	segmental/WGD
Glyma.01G017400.Wm82.a6.v1	4	segmental/WGD
Glyma.01G017550.Wm82.a6.v1	4	segmental/WGD
Glyma.01G017700.Wm82.a6.v1	4	segmental/WGD
Glyma.01G017800.Wm82.a6.v1	4	segmental/WGD
Glyma.01G018000.Wm82.a6.v1	4	segmental/WGD
Glyma.01G018200.Wm82.a6.v1	4	segmental/WGD
Glyma.01G018300.Wm82.a6.v1	4	segmental/WGD
Glyma.01G018400.Wm82.a6.v1	4	segmental/WGD
Glyma.01G018500.Wm82.a6.v1	4	segmental/WGD
Glyma.01G018600.Wm82.a6.v1	4	segmental/WGD
Glyma.01G018700.Wm82.a6.v1	4	segmental/WGD
Glyma.01G018800.Wm82.a6.v1	4	segmental/WGD
Glyma.01G019000.Wm82.a6.v1	4	segmental/WGD
Glyma.01G019100.Wm82.a6.v1	4	segmental/WGD
Glyma.01G019200.Wm82.a6.v1	4	segmental/WGD
Glyma.01G019300.Wm82.a6.v1	4	segmental/WGD
Glyma.01G019400.Wm82.a6.v1	4	segmental/WGD
Glyma.01G019500.Wm82.a6.v1	4	segmental/WGD
Glyma.01G019600.Wm82.a6.v1	4	segmental/WGD
Glyma.01G019700.Wm82.a6.v1	4	segmental/WGD
Glyma.01G019800.Wm82.a6.v1	4	segmental/WGD
Glyma.01G019900.Wm82.a6.v1	4	segmental/WGD
Glyma.01G020000.Wm82.a6.v1	4	segmental/WGD
Glyma.01G020100.Wm82.a6.v1	4	segmental/WGD
Glyma.01G020200.Wm82.a6.v1	4	segmental/WGD
Glyma.01G020300.Wm82.a6.v1	4	segmental/WGD
Glyma.01G020400.Wm82.a6.v1	4	segmental/WGD
Glyma.01G020500.Wm82.a6.v1	4	segmental/WGD
Glyma.01G020600.Wm82.a6.v1	4	segmental/WGD
Glyma.01G020800.Wm82.a6.v1	4	segmental/WGD
Glyma.01G020900.Wm82.a6.v1	4	segmental/WGD
Glyma.01G021100.Wm82.a6.v1	4	segmental/WGD
Glyma.01G021200.Wm82.a6.v1	4	segmental/WGD
Glyma.01G021302.Wm82.a6.v1	4	segmental/WGD
Glyma.01G021400.Wm82.a6.v1	4	segmental/WGD
Glyma.01G021450.Wm82.a6.v1	4	segmental/WGD
Glyma.01G021700.Wm82.a6.v1	4	segmental/WGD
Glyma.01G022100.Wm82.a6.v1	4	segmental/WGD
Glyma.01G022400.Wm82.a6.v1	4	segmental/WGD
Glyma.01G022500.Wm82.a6.v1	4	segmental/WGD
Glyma.01G022600.Wm82.a6.v1	4	segmental/WGD
Glyma.01G022700.Wm82.a6.v1	4	segmental/WGD
Glyma.01G022800.Wm82.a6.v1	4	segmental/WGD
Glyma.01G022900.Wm82.a6.v1	4	segmental/WGD
Glyma.01G023000.Wm82.a6.v1	4	segmental/WGD
Glyma.01G023100.Wm82.a6.v1	4	segmental/WGD
Glyma.01G023200.Wm82.a6.v1	4	segmental/WGD
Glyma.01G023300.Wm82.a6.v1	4	segmental/WGD
Glyma.01G023500.Wm82.a6.v1	4	segmental/WGD
Glyma.01G023600.Wm82.a6.v1	4	segmental/WGD
Glyma.01G023700.Wm82.a6.v1	4	segmental/WGD
Glyma.01G023767.Wm82.a6.v1	4	segmental/WGD
Glyma.01G023833.Wm82.a6.v1	4	segmental/WGD
Glyma.01G023900.Wm82.a6.v1	4	segmental/WGD
Glyma.01G024000.Wm82.a6.v1	4	segmental/WGD
Glyma.01G024100.Wm82.a6.v1	4	segmental/WGD
Glyma.01G024200.Wm82.a6.v1	4	segmental/WGD
Glyma.01G024300.Wm82.a6.v1	4	segmental/WGD
Glyma.01G024600.Wm82.a6.v1	4	segmental/WGD
Glyma.01G024700.Wm82.a6.v1	4	segmental/WGD
Glyma.01G024800.Wm82.a6.v1	4	segmental/WGD
Glyma.01G024900.Wm82.a6.v1	4	segmental/WGD
Glyma.01G025000.Wm82.a6.v1	4	segmental/WGD
Glyma.01G025100.Wm82.a6.v1	4	segmental/WGD
Glyma.01G025200.Wm82.a6.v1	4	segmental/WGD
Glyma.01G025300.Wm82.a6.v1	4	segmental/WGD
Glyma.01G025400.Wm82.a6.v1	4	segmental/WGD
Glyma.01G025500.Wm82.a6.v1	4	segmental/WGD
Glyma.01G025600.Wm82.a6.v1	4	segmental/WGD
Glyma.01G025800.Wm82.a6.v1	4	segmental/WGD
Glyma.01G025900.Wm82.a6.v1	4	segmental/WGD
Glyma.01G026000.Wm82.a6.v1	4	segmental/WGD
Glyma.01G026100.Wm82.a6.v1	4	segmental/WGD
Glyma.01G026200.Wm82.a6.v1	4	segmental/WGD
Glyma.01G026400.Wm82.a6.v1	4	segmental/WGD
Glyma.01G026500.Wm82.a6.v1	4	segmental/WGD
Glyma.01G026600.Wm82.a6.v1	4	segmental/WGD
Glyma.01G026700.Wm82.a6.v1	4	segmental/WGD
Glyma.01G026800.Wm82.a6.v1	4	segmental/WGD
Glyma.01G027000.Wm82.a6.v1	4	segmental/WGD
Glyma.01G027100.Wm82.a6.v1	4	segmental/WGD
Glyma.01G027300.Wm82.a6.v1	4	segmental/WGD
Glyma.01G027400.Wm82.a6.v1	4	segmental/WGD
Glyma.01G027433.Wm82.a6.v1	4	segmental/WGD
Glyma.01G027800.Wm82.a6.v1	4	segmental/WGD
Glyma.01G027900.Wm82.a6.v1	4	segmental/WGD
Glyma.01G027967.Wm82.a6.v1	4	segmental/WGD
Glyma.01G028033.Wm82.a6.v1	4	segmental/WGD
Glyma.01G028100.Wm82.a6.v1	4	segmental/WGD
Glyma.01G028200.Wm82.a6.v1	4	segmental/WGD
Glyma.01G028300.Wm82.a6.v1	4	segmental/WGD
Glyma.01G028600.Wm82.a6.v1	4	segmental/WGD
Glyma.01G028700.Wm82.a6.v1	4	segmental/WGD
Glyma.01G028800.Wm82.a6.v1	4	segmental/WGD
Glyma.01G028900.Wm82.a6.v1	4	segmental/WGD
Glyma.01G029000.Wm82.a6.v1	4	segmental/WGD
Glyma.01G029100.Wm82.a6.v1	4	segmental/WGD
Glyma.01G029200.Wm82.a6.v1	4	segmental/WGD
Glyma.01G029300.Wm82.a6.v1	4	segmental/WGD
Glyma.01G029400.Wm82.a6.v1	4	segmental/WGD
Glyma.01G029500.Wm82.a6.v1	4	segmental/WGD
Glyma.01G029600.Wm82.a6.v1	4	segmental/WGD
Glyma.01G029800.Wm82.a6.v1	4	segmental/WGD
Glyma.01G029900.Wm82.a6.v1	4	segmental/WGD
Glyma.01G030000.Wm82.a6.v1	4	segmental/WGD
Glyma.01G030200.Wm82.a6.v1	4	segmental/WGD
Glyma.01G030300.Wm82.a6.v1	4	segmental/WGD
Glyma.01G030400.Wm82.a6.v1	4	segmental/WGD
Glyma.01G030500.Wm82.a6.v1	4	segmental/WGD
Glyma.01G030600.Wm82.a6.v1	4	segmental/WGD
Glyma.01G030900.Wm82.a6.v1	4	segmental/WGD
Glyma.01G031033.Wm82.a6.v1	4	segmental/WGD
Glyma.01G031300.Wm82.a6.v1	4	segmental/WGD
Glyma.01G031400.Wm82.a6.v1	4	segmental/WGD
Glyma.01G031500.Wm82.a6.v1	4	segmental/WGD
Glyma.01G031700.Wm82.a6.v1	4	segmental/WGD
Glyma.01G031800.Wm82.a6.v1	4	segmental/WGD
Glyma.01G031900.Wm82.a6.v1	4	segmental/WGD
Glyma.01G032000.Wm82.a6.v1	4	segmental/WGD
Glyma.01G032100.Wm82.a6.v1	4	segmental/WGD
Glyma.01G032200.Wm82.a6.v1	4	segmental/WGD
Glyma.01G032300.Wm82.a6.v1	4	segmental/WGD
Glyma.01G032400.Wm82.a6.v1	4	segmental/WGD
Glyma.01G032500.Wm82.a6.v1	4	segmental/WGD
Glyma.01G032600.Wm82.a6.v1	4	segmental/WGD
Glyma.01G032900.Wm82.a6.v1	4	segmental/WGD
Glyma.01G033000.Wm82.a6.v1	4	segmental/WGD
Glyma.01G033200.Wm82.a6.v1	4	segmental/WGD
Glyma.01G033300.Wm82.a6.v1	4	segmental/WGD
Glyma.01G033500.Wm82.a6.v1	4	segmental/WGD
Glyma.01G034000.Wm82.a6.v1	4	segmental/WGD
Glyma.01G034100.Wm82.a6.v1	4	segmental/WGD
Glyma.01G034200.Wm82.a6.v1	4	segmental/WGD
Glyma.01G034300.Wm82.a6.v1	4	segmental/WGD
Glyma.01G034600.Wm82.a6.v1	4	segmental/WGD
Glyma.01G034900.Wm82.a6.v1	4	segmental/WGD
Glyma.01G035000.Wm82.a6.v1	4	segmental/WGD
Glyma.01G035100.Wm82.a6.v1	4	segmental/WGD
Glyma.01G035300.Wm82.a6.v1	4	segmental/WGD
Glyma.01G035400.Wm82.a6.v1	4	segmental/WGD
Glyma.01G035600.Wm82.a6.v1	4	segmental/WGD
Glyma.01G035700.Wm82.a6.v1	4	segmental/WGD
Glyma.01G035800.Wm82.a6.v1	4	segmental/WGD
Glyma.01G035901.Wm82.a6.v1	4	segmental/WGD
Glyma.01G036000.Wm82.a6.v1	4	segmental/WGD
Glyma.01G036050.Wm82.a6.v1	4	segmental/WGD
Glyma.01G036200.Wm82.a6.v1	4	segmental/WGD
Glyma.01G036300.Wm82.a6.v1	4	segmental/WGD
Glyma.01G036500.Wm82.a6.v1	4	segmental/WGD
Glyma.01G036700.Wm82.a6.v1	4	segmental/WGD
Glyma.01G036800.Wm82.a6.v1	4	segmental/WGD
Glyma.01G036900.Wm82.a6.v1	4	segmental/WGD
Glyma.01G037000.Wm82.a6.v1	4	segmental/WGD
Glyma.01G037300.Wm82.a6.v1	4	segmental/WGD
Glyma.01G037400.Wm82.a6.v1	4	segmental/WGD
Glyma.01G037500.Wm82.a6.v1	4	segmental/WGD
Glyma.01G037600.Wm82.a6.v1	4	segmental/WGD
Glyma.01G037700.Wm82.a6.v1	4	segmental/WGD
Glyma.01G037800.Wm82.a6.v1	4	segmental/WGD
Glyma.01G037900.Wm82.a6.v1	4	segmental/WGD
Glyma.01G038002.Wm82.a6.v1	4	segmental/WGD
Glyma.01G038100.Wm82.a6.v1	4	segmental/WGD
Glyma.01G038251.Wm82.a6.v1	4	segmental/WGD
Glyma.01G038400.Wm82.a6.v1	4	segmental/WGD
Glyma.01G038500.Wm82.a6.v1	4	segmental/WGD
Glyma.01G038600.Wm82.a6.v1	4	segmental/WGD
Glyma.01G038651.Wm82.a6.v1	4	segmental/WGD
Glyma.01G038700.Wm82.a6.v1	4	segmental/WGD
Glyma.01G038800.Wm82.a6.v1	4	segmental/WGD
Glyma.01G038900.Wm82.a6.v1	4	segmental/WGD
Glyma.01G039000.Wm82.a6.v1	4	segmental/WGD
Glyma.01G039100.Wm82.a6.v1	4	segmental/WGD
Glyma.01G039200.Wm82.a6.v1	4	segmental/WGD
Glyma.01G039400.Wm82.a6.v1	4	segmental/WGD
Glyma.01G039500.Wm82.a6.v1	4	segmental/WGD
Glyma.01G039600.Wm82.a6.v1	4	segmental/WGD
Glyma.01G039700.Wm82.a6.v1	4	segmental/WGD
Glyma.01G039800.Wm82.a6.v1	4	segmental/WGD
Glyma.01G039900.Wm82.a6.v1	4	segmental/WGD
Glyma.01G040000.Wm82.a6.v1	4	segmental/WGD
Glyma.01G040300.Wm82.a6.v1	4	segmental/WGD
Glyma.01G040400.Wm82.a6.v1	4	segmental/WGD
Glyma.01G040500.Wm82.a6.v1	4	segmental/WGD
Glyma.01G040600.Wm82.a6.v1	4	segmental/WGD
Glyma.01G040700.Wm82.a6.v1	4	segmental/WGD
Glyma.01G041300.Wm82.a6.v1	4	segmental/WGD
Glyma.01G041400.Wm82.a6.v1	4	segmental/WGD
Glyma.01G041500.Wm82.a6.v1	4	segmental/WGD
Glyma.01G041600.Wm82.a6.v1	4	segmental/WGD
Glyma.01G041651.Wm82.a6.v1	4	segmental/WGD
Glyma.01G041700.Wm82.a6.v1	4	segmental/WGD
Glyma.01G042100.Wm82.a6.v1	4	segmental/WGD
Glyma.01G042300.Wm82.a6.v1	4	segmental/WGD
Glyma.01G042400.Wm82.a6.v1	4	segmental/WGD
Glyma.01G042600.Wm82.a6.v1	4	segmental/WGD
Glyma.01G042700.Wm82.a6.v1	4	segmental/WGD
Glyma.01G042800.Wm82.a6.v1	4	segmental/WGD
Glyma.01G043000.Wm82.a6.v1	4	segmental/WGD
Glyma.01G043100.Wm82.a6.v1	4	segmental/WGD
Glyma.01G043300.Wm82.a6.v1	4	segmental/WGD
Glyma.01G043600.Wm82.a6.v1	4	segmental/WGD
Glyma.01G043700.Wm82.a6.v1	4	segmental/WGD
Glyma.01G043800.Wm82.a6.v1	4	segmental/WGD
Glyma.01G044000.Wm82.a6.v1	4	segmental/WGD
Glyma.01G044100.Wm82.a6.v1	4	segmental/WGD
Glyma.01G044200.Wm82.a6.v1	4	segmental/WGD
Glyma.01G044300.Wm82.a6.v1	4	segmental/WGD
Glyma.01G044500.Wm82.a6.v1	4	segmental/WGD
Glyma.01G044600.Wm82.a6.v1	4	segmental/WGD
Glyma.01G044800.Wm82.a6.v1	4	segmental/WGD
Glyma.01G044900.Wm82.a6.v1	4	segmental/WGD
Glyma.01G045100.Wm82.a6.v1	4	segmental/WGD
Glyma.01G045200.Wm82.a6.v1	4	segmental/WGD
Glyma.01G045300.Wm82.a6.v1	4	segmental/WGD
Glyma.01G045400.Wm82.a6.v1	4	segmental/WGD
Glyma.01G045500.Wm82.a6.v1	4	segmental/WGD
Glyma.01G045700.Wm82.a6.v1	4	segmental/WGD
Glyma.01G045800.Wm82.a6.v1	4	segmental/WGD
Glyma.01G045900.Wm82.a6.v1	4	segmental/WGD
Glyma.01G046000.Wm82.a6.v1	4	segmental/WGD
Glyma.01G046101.Wm82.a6.v1	4	segmental/WGD
Glyma.01G046300.Wm82.a6.v1	4	segmental/WGD
Glyma.01G046400.Wm82.a6.v1	4	segmental/WGD
Glyma.01G046500.Wm82.a6.v1	4	segmental/WGD
Glyma.01G046600.Wm82.a6.v1	4	segmental/WGD
Glyma.01G046700.Wm82.a6.v1	4	segmental/WGD
Glyma.01G046800.Wm82.a6.v1	4	segmental/WGD
Glyma.01G046900.Wm82.a6.v1	4	segmental/WGD
Glyma.01G047000.Wm82.a6.v1	4	segmental/WGD
Glyma.01G047100.Wm82.a6.v1	4	segmental/WGD
Glyma.01G047350.Wm82.a6.v1	4	segmental/WGD
Glyma.01G047700.Wm82.a6.v1	4	segmental/WGD
Glyma.01G047800.Wm82.a6.v1	4	segmental/WGD
Glyma.01G047900.Wm82.a6.v1	4	segmental/WGD
Glyma.01G048000.Wm82.a6.v1	4	segmental/WGD
Glyma.01G048100.Wm82.a6.v1	4	segmental/WGD
Glyma.01G048200.Wm82.a6.v1	4	segmental/WGD
Glyma.01G048500.Wm82.a6.v1	4	segmental/WGD
Glyma.01G048600.Wm82.a6.v1	4	segmental/WGD
Glyma.01G048700.Wm82.a6.v1	4	segmental/WGD
Glyma.01G048800.Wm82.a6.v1	4	segmental/WGD
Glyma.01G049100.Wm82.a6.v1	4	segmental/WGD
Glyma.01G049300.Wm82.a6.v1	4	segmental/WGD
Glyma.01G049400.Wm82.a6.v1	4	segmental/WGD
Glyma.01G049500.Wm82.a6.v1	4	segmental/WGD
Glyma.01G049600.Wm82.a6.v1	4	segmental/WGD
Glyma.01G049900.Wm82.a6.v1	4	segmental/WGD
Glyma.01G050100.Wm82.a6.v1	4	segmental/WGD
Glyma.01G050350.Wm82.a6.v1	4	segmental/WGD
Glyma.01G050400.Wm82.a6.v1	4	segmental/WGD
Glyma.01G050500.Wm82.a6.v1	4	segmental/WGD
Glyma.01G050701.Wm82.a6.v1	4	segmental/WGD
Glyma.01G051300.Wm82.a6.v1	4	segmental/WGD
Glyma.01G051400.Wm82.a6.v1	4	segmental/WGD
Glyma.01G051700.Wm82.a6.v1	4	segmental/WGD
Glyma.01G052200.Wm82.a6.v1	4	segmental/WGD
Glyma.01G052400.Wm82.a6.v1	4	segmental/WGD
Glyma.01G052500.Wm82.a6.v1	4	segmental/WGD
Glyma.01G052600.Wm82.a6.v1	4	segmental/WGD
Glyma.01G052700.Wm82.a6.v1	4	segmental/WGD
Glyma.01G052800.Wm82.a6.v1	4	segmental/WGD
Glyma.01G052900.Wm82.a6.v1	4	segmental/WGD
Glyma.01G053100.Wm82.a6.v1	4	segmental/WGD
Glyma.01G053200.Wm82.a6.v1	4	segmental/WGD
Glyma.01G053300.Wm82.a6.v1	4	segmental/WGD
Glyma.01G053600.Wm82.a6.v1	4	segmental/WGD
Glyma.01G053700.Wm82.a6.v1	4	segmental/WGD
Glyma.01G053800.Wm82.a6.v1	4	segmental/WGD
Glyma.01G054000.Wm82.a6.v1	4	segmental/WGD
Glyma.01G054100.Wm82.a6.v1	4	segmental/WGD
Glyma.01G054200.Wm82.a6.v1	4	segmental/WGD
Glyma.01G054300.Wm82.a6.v1	4	segmental/WGD
Glyma.01G054400.Wm82.a6.v1	4	segmental/WGD
Glyma.01G054500.Wm82.a6.v1	4	segmental/WGD
Glyma.01G054800.Wm82.a6.v1	4	segmental/WGD
Glyma.01G054900.Wm82.a6.v1	4	segmental/WGD
Glyma.01G055050.Wm82.a6.v1	4	segmental/WGD
Glyma.01G055200.Wm82.a6.v1	4	segmental/WGD
Glyma.01G055300.Wm82.a6.v1	4	segmental/WGD
Glyma.01G055400.Wm82.a6.v1	4	segmental/WGD
Glyma.01G055500.Wm82.a6.v1	4	segmental/WGD
Glyma.01G055700.Wm82.a6.v1	4	segmental/WGD
Glyma.01G055900.Wm82.a6.v1	4	segmental/WGD
Glyma.01G056000.Wm82.a6.v1	4	segmental/WGD
Glyma.01G056100.Wm82.a6.v1	4	segmental/WGD
Glyma.01G056201.Wm82.a6.v1	4	segmental/WGD
Glyma.01G056300.Wm82.a6.v1	4	segmental/WGD
Glyma.01G056400.Wm82.a6.v1	4	segmental/WGD
Glyma.01G056500.Wm82.a6.v1	4	segmental/WGD
Glyma.01G056800.Wm82.a6.v1	4	segmental/WGD
Glyma.01G056900.Wm82.a6.v1	4	segmental/WGD
Glyma.01G057100.Wm82.a6.v1	4	segmental/WGD
Glyma.01G057200.Wm82.a6.v1	4	segmental/WGD
Glyma.01G057400.Wm82.a6.v1	4	segmental/WGD
Glyma.01G057500.Wm82.a6.v1	4	segmental/WGD
Glyma.01G057600.Wm82.a6.v1	4	segmental/WGD
Glyma.01G057801.Wm82.a6.v1	4	segmental/WGD
Glyma.01G057900.Wm82.a6.v1	4	segmental/WGD
Glyma.01G058000.Wm82.a6.v1	4	segmental/WGD
Glyma.01G058200.Wm82.a6.v1	4	segmental/WGD
Glyma.01G058300.Wm82.a6.v1	4	segmental/WGD
Glyma.01G058400.Wm82.a6.v1	4	segmental/WGD
Glyma.01G058500.Wm82.a6.v1	4	segmental/WGD
Glyma.01G058700.Wm82.a6.v1	4	segmental/WGD
Glyma.01G058800.Wm82.a6.v1	4	segmental/WGD
Glyma.01G059000.Wm82.a6.v1	4	segmental/WGD
Glyma.01G059100.Wm82.a6.v1	4	segmental/WGD
Glyma.01G059200.Wm82.a6.v1	4	segmental/WGD
Glyma.01G059450.Wm82.a6.v1	4	segmental/WGD
Glyma.01G059675.Wm82.a6.v1	4	segmental/WGD
Glyma.01G059900.Wm82.a6.v1	4	segmental/WGD
Glyma.01G060001.Wm82.a6.v1	4	segmental/WGD
Glyma.01G060300.Wm82.a6.v1	4	segmental/WGD
Glyma.01G060700.Wm82.a6.v1	4	segmental/WGD
Glyma.01G060900.Wm82.a6.v1	4	segmental/WGD
Glyma.01G061000.Wm82.a6.v1	4	segmental/WGD
Glyma.01G061100.Wm82.a6.v1	4	segmental/WGD
Glyma.01G061200.Wm82.a6.v1	4	segmental/WGD
Glyma.01G061500.Wm82.a6.v1	4	segmental/WGD
Glyma.01G061700.Wm82.a6.v1	4	segmental/WGD
Glyma.01G061900.Wm82.a6.v1	4	segmental/WGD
Glyma.01G062000.Wm82.a6.v1	4	segmental/WGD
Glyma.01G062100.Wm82.a6.v1	4	segmental/WGD
Glyma.01G062200.Wm82.a6.v1	4	segmental/WGD
Glyma.01G062300.Wm82.a6.v1	4	segmental/WGD
Glyma.01G062400.Wm82.a6.v1	4	segmental/WGD
Glyma.01G062900.Wm82.a6.v1	4	segmental/WGD
Glyma.01G063000.Wm82.a6.v1	4	segmental/WGD
Glyma.01G063100.Wm82.a6.v1	4	segmental/WGD
Glyma.01G063175.Wm82.a6.v1	4	segmental/WGD
Glyma.01G063500.Wm82.a6.v1	4	segmental/WGD
Glyma.01G063600.Wm82.a6.v1	4	segmental/WGD
Glyma.01G063700.Wm82.a6.v1	4	segmental/WGD
Glyma.01G063751.Wm82.a6.v1	4	segmental/WGD
Glyma.01G063800.Wm82.a6.v1	4	segmental/WGD
Glyma.01G064100.Wm82.a6.v1	4	segmental/WGD
Glyma.01G064200.Wm82.a6.v1	4	segmental/WGD
Glyma.01G064400.Wm82.a6.v1	4	segmental/WGD
Glyma.01G064500.Wm82.a6.v1	4	segmental/WGD
Glyma.01G064600.Wm82.a6.v1	4	segmental/WGD
Glyma.01G064900.Wm82.a6.v1	4	segmental/WGD
Glyma.01G065000.Wm82.a6.v1	4	segmental/WGD
Glyma.01G065100.Wm82.a6.v1	4	segmental/WGD
Glyma.01G065400.Wm82.a6.v1	4	segmental/WGD
Glyma.01G065500.Wm82.a6.v1	4	segmental/WGD
Glyma.01G065800.Wm82.a6.v1	4	segmental/WGD
Glyma.01G066000.Wm82.a6.v1	4	segmental/WGD
Glyma.01G066500.Wm82.a6.v1	4	segmental/WGD
Glyma.01G066600.Wm82.a6.v1	4	segmental/WGD
Glyma.01G067000.Wm82.a6.v1	4	segmental/WGD
Glyma.01G067100.Wm82.a6.v1	4	segmental/WGD
Glyma.01G067200.Wm82.a6.v1	4	segmental/WGD
Glyma.01G067600.Wm82.a6.v1	4	segmental/WGD
Glyma.01G067700.Wm82.a6.v1	4	segmental/WGD
Glyma.01G067800.Wm82.a6.v1	4	segmental/WGD
Glyma.01G067900.Wm82.a6.v1	4	segmental/WGD
Glyma.01G068000.Wm82.a6.v1	4	segmental/WGD
Glyma.01G068100.Wm82.a6.v1	4	segmental/WGD
Glyma.01G068200.Wm82.a6.v1	4	segmental/WGD
Glyma.01G068600.Wm82.a6.v1	4	segmental/WGD
Glyma.01G068800.Wm82.a6.v1	4	segmental/WGD
Glyma.01G069300.Wm82.a6.v1	4	segmental/WGD
Glyma.01G069400.Wm82.a6.v1	4	segmental/WGD
Glyma.01G069500.Wm82.a6.v1	4	segmental/WGD
Glyma.01G069700.Wm82.a6.v1	4	segmental/WGD
Glyma.01G070150.Wm82.a6.v1	4	segmental/WGD
Glyma.01G070200.Wm82.a6.v1	4	segmental/WGD
Glyma.01G070300.Wm82.a6.v1	4	segmental/WGD
Glyma.01G070400.Wm82.a6.v1	4	segmental/WGD
Glyma.01G070850.Wm82.a6.v1	4	segmental/WGD
Glyma.01G071400.Wm82.a6.v1	4	segmental/WGD
Glyma.01G071300.Wm82.a6.v1	4	segmental/WGD
Glyma.01G071700.Wm82.a6.v1	4	segmental/WGD
Glyma.01G071800.Wm82.a6.v1	4	segmental/WGD
Glyma.01G072000.Wm82.a6.v1	4	segmental/WGD
Glyma.01G072450.Wm82.a6.v1	4	segmental/WGD
Glyma.01G074600.Wm82.a6.v1	4	segmental/WGD
Glyma.01G074200.Wm82.a6.v1	4	segmental/WGD
Glyma.01G074000.Wm82.a6.v1	4	segmental/WGD
Glyma.01G073600.Wm82.a6.v1	4	segmental/WGD
Glyma.01G073500.Wm82.a6.v1	4	segmental/WGD
Glyma.01G073400.Wm82.a6.v1	4	segmental/WGD
Glyma.01G073200.Wm82.a6.v1	4	segmental/WGD
Glyma.01G074700.Wm82.a6.v1	4	segmental/WGD
Glyma.01G075400.Wm82.a6.v1	4	segmental/WGD
Glyma.01G075800.Wm82.a6.v1	4	segmental/WGD
Glyma.01G076100.Wm82.a6.v1	4	segmental/WGD
Glyma.01G076200.Wm82.a6.v1	4	segmental/WGD
Glyma.01G076900.Wm82.a6.v1	4	segmental/WGD
Glyma.01G077000.Wm82.a6.v1	4	segmental/WGD
Glyma.01G077200.Wm82.a6.v1	4	segmental/WGD
Glyma.01G077700.Wm82.a6.v1	4	segmental/WGD
Glyma.01G078000.Wm82.a6.v1	4	segmental/WGD
Glyma.01G078200.Wm82.a6.v1	4	segmental/WGD
Glyma.01G078300.Wm82.a6.v1	4	segmental/WGD
Glyma.01G078400.Wm82.a6.v1	4	segmental/WGD
Glyma.01G078600.Wm82.a6.v1	4	segmental/WGD
Glyma.01G079100.Wm82.a6.v1	4	segmental/WGD
Glyma.01G079500.Wm82.a6.v1	4	segmental/WGD
Glyma.01G079800.Wm82.a6.v1	4	segmental/WGD
Glyma.01G079900.Wm82.a6.v1	4	segmental/WGD
Glyma.01G080300.Wm82.a6.v1	4	segmental/WGD
Glyma.01G080500.Wm82.a6.v1	4	segmental/WGD
Glyma.01G080600.Wm82.a6.v1	4	segmental/WGD
Glyma.01G080900.Wm82.a6.v1	4	segmental/WGD
Glyma.01G081100.Wm82.a6.v1	4	segmental/WGD
Glyma.01G081300.Wm82.a6.v1	4	segmental/WGD
Glyma.01G081400.Wm82.a6.v1	4	segmental/WGD
Glyma.01G081500.Wm82.a6.v1	4	segmental/WGD
Glyma.01G081600.Wm82.a6.v1	4	segmental/WGD
Glyma.01G081900.Wm82.a6.v1	4	segmental/WGD
Glyma.01G082000.Wm82.a6.v1	4	segmental/WGD
Glyma.01G082200.Wm82.a6.v1	4	segmental/WGD
Glyma.01G082400.Wm82.a6.v1	4	segmental/WGD
Glyma.01G082500.Wm82.a6.v1	4	segmental/WGD
Glyma.01G082600.Wm82.a6.v1	4	segmental/WGD
Glyma.01G082700.Wm82.a6.v1	4	segmental/WGD
Glyma.01G083000.Wm82.a6.v1	4	segmental/WGD
Glyma.01G083100.Wm82.a6.v1	4	segmental/WGD
Glyma.01G083700.Wm82.a6.v1	4	segmental/WGD
Glyma.01G083900.Wm82.a6.v1	4	segmental/WGD
Glyma.01G084000.Wm82.a6.v1	4	segmental/WGD
Glyma.01G084200.Wm82.a6.v1	4	segmental/WGD
Glyma.01G084500.Wm82.a6.v1	4	segmental/WGD
Glyma.01G084600.Wm82.a6.v1	4	segmental/WGD
Glyma.01G084700.Wm82.a6.v1	4	segmental/WGD
Glyma.01G084800.Wm82.a6.v1	4	segmental/WGD
Glyma.01G085200.Wm82.a6.v1	4	segmental/WGD
Glyma.01G085466.Wm82.a6.v1	4	segmental/WGD
Glyma.01G085600.Wm82.a6.v1	4	segmental/WGD
Glyma.01G086000.Wm82.a6.v1	4	segmental/WGD
Glyma.01G086201.Wm82.a6.v1	4	segmental/WGD
Glyma.01G086401.Wm82.a6.v1	4	segmental/WGD
Glyma.01G086700.Wm82.a6.v1	4	segmental/WGD
Glyma.01G086800.Wm82.a6.v1	4	segmental/WGD
Glyma.01G086900.Wm82.a6.v1	4	segmental/WGD
Glyma.01G087000.Wm82.a6.v1	4	segmental/WGD
Glyma.01G087500.Wm82.a6.v1	4	segmental/WGD
Glyma.01G087700.Wm82.a6.v1	4	segmental/WGD
Glyma.01G087800.Wm82.a6.v1	4	segmental/WGD
Glyma.01G087900.Wm82.a6.v1	4	segmental/WGD
Glyma.01G088000.Wm82.a6.v1	4	segmental/WGD
Glyma.01G088200.Wm82.a6.v1	4	segmental/WGD
Glyma.01G088300.Wm82.a6.v1	4	segmental/WGD
Glyma.01G088533.Wm82.a6.v1	4	segmental/WGD
Glyma.01G088766.Wm82.a6.v1	4	segmental/WGD
Glyma.01G089000.Wm82.a6.v1	4	segmental/WGD
Glyma.01G089100.Wm82.a6.v1	4	segmental/WGD
Glyma.01G089202.Wm82.a6.v1	4	segmental/WGD
Glyma.01G089300.Wm82.a6.v1	4	segmental/WGD
Glyma.01G089500.Wm82.a6.v1	4	segmental/WGD
Glyma.01G089700.Wm82.a6.v1	4	segmental/WGD
Glyma.01G089800.Wm82.a6.v1	4	segmental/WGD
Glyma.01G089900.Wm82.a6.v1	4	segmental/WGD
Glyma.01G090050.Wm82.a6.v1	4	segmental/WGD
Glyma.01G090200.Wm82.a6.v1	4	segmental/WGD
Glyma.01G090400.Wm82.a6.v1	4	segmental/WGD
Glyma.01G090700.Wm82.a6.v1	4	segmental/WGD
Glyma.01G090900.Wm82.a6.v1	4	segmental/WGD
Glyma.01G091000.Wm82.a6.v1	4	segmental/WGD
Glyma.01G091100.Wm82.a6.v1	4	segmental/WGD
Glyma.01G091300.Wm82.a6.v1	4	segmental/WGD
Glyma.01G091400.Wm82.a6.v1	4	segmental/WGD
Glyma.01G091800.Wm82.a6.v1	4	segmental/WGD
Glyma.01G092100.Wm82.a6.v1	4	segmental/WGD
Glyma.01G092300.Wm82.a6.v1	4	segmental/WGD
Glyma.01G092400.Wm82.a6.v1	4	segmental/WGD
Glyma.01G092900.Wm82.a6.v1	4	segmental/WGD
Glyma.01G093000.Wm82.a6.v1	4	segmental/WGD
Glyma.01G093100.Wm82.a6.v1	4	segmental/WGD
Glyma.01G093200.Wm82.a6.v1	4	segmental/WGD
Glyma.01G093400.Wm82.a6.v1	4	segmental/WGD
Glyma.01G093800.Wm82.a6.v1	4	segmental/WGD
Glyma.01G093902.Wm82.a6.v1	4	segmental/WGD
Glyma.01G094000.Wm82.a6.v1	4	segmental/WGD
Glyma.01G095000.Wm82.a6.v1	4	segmental/WGD
Glyma.01G096000.Wm82.a6.v1	4	segmental/WGD
Glyma.01G095700.Wm82.a6.v1	4	segmental/WGD
Glyma.01G095600.Wm82.a6.v1	4	segmental/WGD
Glyma.01G095500.Wm82.a6.v1	4	segmental/WGD
Glyma.01G095100.Wm82.a6.v1	4	segmental/WGD
Glyma.01G095232.Wm82.a6.v1	4	segmental/WGD
Glyma.01G095432.Wm82.a6.v1	4	segmental/WGD
Glyma.01G095298.Wm82.a6.v1	4	segmental/WGD
Glyma.01G096300.Wm82.a6.v1	4	segmental/WGD
Glyma.01G096600.Wm82.a6.v1	4	segmental/WGD
Glyma.01G096800.Wm82.a6.v1	4	segmental/WGD
Glyma.01G097000.Wm82.a6.v1	4	segmental/WGD
Glyma.01G097100.Wm82.a6.v1	4	segmental/WGD
Glyma.01G097200.Wm82.a6.v1	4	segmental/WGD
Glyma.01G097400.Wm82.a6.v1	4	segmental/WGD
Glyma.01G097500.Wm82.a6.v1	4	segmental/WGD
Glyma.01G097700.Wm82.a6.v1	4	segmental/WGD
Glyma.01G097900.Wm82.a6.v1	4	segmental/WGD
Glyma.01G098000.Wm82.a6.v1	4	segmental/WGD
Glyma.01G098400.Wm82.a6.v1	4	segmental/WGD
Glyma.01G098700.Wm82.a6.v1	4	segmental/WGD
Glyma.01G098966.Wm82.a6.v1	4	segmental/WGD
Glyma.01G099100.Wm82.a6.v1	4	segmental/WGD
Glyma.01G099200.Wm82.a6.v1	4	segmental/WGD
Glyma.01G099600.Wm82.a6.v1	4	segmental/WGD
Glyma.01G099700.Wm82.a6.v1	4	segmental/WGD
Glyma.01G099800.Wm82.a6.v1	4	segmental/WGD
Glyma.01G100000.Wm82.a6.v1	4	segmental/WGD
Glyma.01G100100.Wm82.a6.v1	4	segmental/WGD
Glyma.01G100200.Wm82.a6.v1	4	segmental/WGD
Glyma.01G100900.Wm82.a6.v1	4	segmental/WGD
Glyma.01G101000.Wm82.a6.v1	4	segmental/WGD
Glyma.01G101100.Wm82.a6.v1	4	segmental/WGD
Glyma.01G101800.Wm82.a6.v1	4	segmental/WGD
Glyma.01G102100.Wm82.a6.v1	4	segmental/WGD
Glyma.01G102300.Wm82.a6.v1	4	segmental/WGD
Glyma.01G102400.Wm82.a6.v1	4	segmental/WGD
Glyma.01G102500.Wm82.a6.v1	4	segmental/WGD
Glyma.01G103100.Wm82.a6.v1	4	segmental/WGD
Glyma.01G103200.Wm82.a6.v1	4	segmental/WGD
Glyma.01G103500.Wm82.a6.v1	4	segmental/WGD
Glyma.01G104100.Wm82.a6.v1	4	segmental/WGD
Glyma.01G104200.Wm82.a6.v1	4	segmental/WGD
Glyma.01G104600.Wm82.a6.v1	4	segmental/WGD
Glyma.01G104800.Wm82.a6.v1	4	segmental/WGD
Glyma.01G105000.Wm82.a6.v1	4	segmental/WGD
Glyma.01G105300.Wm82.a6.v1	4	segmental/WGD
Glyma.01G105400.Wm82.a6.v1	4	segmental/WGD
Glyma.01G105500.Wm82.a6.v1	4	segmental/WGD
Glyma.01G105600.Wm82.a6.v1	4	segmental/WGD
Glyma.01G105900.Wm82.a6.v1	4	segmental/WGD
Glyma.01G106000.Wm82.a6.v1	4	segmental/WGD
Glyma.01G106200.Wm82.a6.v1	4	segmental/WGD
Glyma.01G106500.Wm82.a6.v1	4	segmental/WGD
Glyma.01G106600.Wm82.a6.v1	4	segmental/WGD
Glyma.01G106700.Wm82.a6.v1	4	segmental/WGD
Glyma.01G106800.Wm82.a6.v1	4	segmental/WGD
Glyma.01G106901.Wm82.a6.v1	4	segmental/WGD
Glyma.01G107000.Wm82.a6.v1	4	segmental/WGD
Glyma.01G107100.Wm82.a6.v1	4	segmental/WGD
Glyma.01G107500.Wm82.a6.v1	4	segmental/WGD
Glyma.01G107700.Wm82.a6.v1	4	segmental/WGD
Glyma.01G107851.Wm82.a6.v1	4	segmental/WGD
Glyma.01G108000.Wm82.a6.v1	4	segmental/WGD
Glyma.01G108066.Wm82.a6.v1	4	segmental/WGD
Glyma.01G108132.Wm82.a6.v1	4	segmental/WGD
Glyma.01G108200.Wm82.a6.v1	4	segmental/WGD
Glyma.01G108700.Wm82.a6.v1	4	segmental/WGD
Glyma.01G108800.Wm82.a6.v1	4	segmental/WGD
Glyma.01G109200.Wm82.a6.v1	4	segmental/WGD
Glyma.01G109300.Wm82.a6.v1	4	segmental/WGD
Glyma.01G109500.Wm82.a6.v1	4	segmental/WGD
Glyma.01G109600.Wm82.a6.v1	4	segmental/WGD
Glyma.01G109800.Wm82.a6.v1	4	segmental/WGD
Glyma.01G110100.Wm82.a6.v1	4	segmental/WGD
Glyma.01G110200.Wm82.a6.v1	4	segmental/WGD
Glyma.01G110300.Wm82.a6.v1	4	segmental/WGD
Glyma.01G110400.Wm82.a6.v1	4	segmental/WGD
Glyma.01G110500.Wm82.a6.v1	4	segmental/WGD
Glyma.01G110600.Wm82.a6.v1	4	segmental/WGD
Glyma.01G110900.Wm82.a6.v1	4	segmental/WGD
Glyma.01G111000.Wm82.a6.v1	4	segmental/WGD
Glyma.01G111200.Wm82.a6.v1	4	segmental/WGD
Glyma.01G111300.Wm82.a6.v1	4	segmental/WGD
Glyma.01G111400.Wm82.a6.v1	4	segmental/WGD
Glyma.01G111500.Wm82.a6.v1	4	segmental/WGD
Glyma.01G111900.Wm82.a6.v1	4	segmental/WGD
Glyma.01G112200.Wm82.a6.v1	4	segmental/WGD
Glyma.01G112300.Wm82.a6.v1	4	segmental/WGD
Glyma.01G112400.Wm82.a6.v1	4	segmental/WGD
Glyma.01G112500.Wm82.a6.v1	4	segmental/WGD
Glyma.01G112600.Wm82.a6.v1	4	segmental/WGD
Glyma.01G112700.Wm82.a6.v1	4	segmental/WGD
Glyma.01G112900.Wm82.a6.v1	4	segmental/WGD
Glyma.01G113000.Wm82.a6.v1	4	segmental/WGD
Glyma.01G113100.Wm82.a6.v1	4	segmental/WGD
Glyma.01G113200.Wm82.a6.v1	4	segmental/WGD
Glyma.01G113400.Wm82.a6.v1	4	segmental/WGD
Glyma.01G114000.Wm82.a6.v1	4	segmental/WGD
Glyma.01G114050.Wm82.a6.v1	4	segmental/WGD
Glyma.01G114400.Wm82.a6.v1	4	segmental/WGD
Glyma.01G114800.Wm82.a6.v1	4	segmental/WGD
Glyma.01G114900.Wm82.a6.v1	4	segmental/WGD
Glyma.01G115000.Wm82.a6.v1	4	segmental/WGD
Glyma.01G115600.Wm82.a6.v1	4	segmental/WGD
Glyma.01G115900.Wm82.a6.v1	4	segmental/WGD
Glyma.01G116000.Wm82.a6.v1	4	segmental/WGD
Glyma.01G116100.Wm82.a6.v1	4	segmental/WGD
Glyma.01G116300.Wm82.a6.v1	4	segmental/WGD
Glyma.01G117000.Wm82.a6.v1	4	segmental/WGD
Glyma.01G117200.Wm82.a6.v1	4	segmental/WGD
Glyma.01G117800.Wm82.a6.v1	4	segmental/WGD
Glyma.01G117900.Wm82.a6.v1	4	segmental/WGD
Glyma.01G118000.Wm82.a6.v1	4	segmental/WGD
Glyma.01G118200.Wm82.a6.v1	4	segmental/WGD
Glyma.01G118350.Wm82.a6.v1	4	segmental/WGD
Glyma.01G118800.Wm82.a6.v1	4	segmental/WGD
Glyma.01G118900.Wm82.a6.v1	4	segmental/WGD
Glyma.01G119101.Wm82.a6.v1	4	segmental/WGD
Glyma.01G119400.Wm82.a6.v1	4	segmental/WGD
Glyma.01G119500.Wm82.a6.v1	4	segmental/WGD
Glyma.01G119600.Wm82.a6.v1	4	segmental/WGD
Glyma.01G119900.Wm82.a6.v1	4	segmental/WGD
Glyma.01G120000.Wm82.a6.v1	4	segmental/WGD
Glyma.01G120400.Wm82.a6.v1	4	segmental/WGD
Glyma.01G120800.Wm82.a6.v1	4	segmental/WGD
Glyma.01G121000.Wm82.a6.v1	4	segmental/WGD
Glyma.01G121208.Wm82.a6.v1	4	segmental/WGD
Glyma.01G121218.Wm82.a6.v1	4	segmental/WGD
Glyma.01G121300.Wm82.a6.v1	4	segmental/WGD
Glyma.01G121400.Wm82.a6.v1	4	segmental/WGD
Glyma.01G121600.Wm82.a6.v1	4	segmental/WGD
Glyma.01G121700.Wm82.a6.v1	4	segmental/WGD
Glyma.01G122000.Wm82.a6.v1	4	segmental/WGD
Glyma.01G122100.Wm82.a6.v1	4	segmental/WGD
Glyma.01G122502.Wm82.a6.v1	4	segmental/WGD
Glyma.01G122800.Wm82.a6.v1	4	segmental/WGD
Glyma.01G123000.Wm82.a6.v1	4	segmental/WGD
Glyma.01G123100.Wm82.a6.v1	4	segmental/WGD
Glyma.01G123300.Wm82.a6.v1	4	segmental/WGD
Glyma.01G123400.Wm82.a6.v1	4	segmental/WGD
Glyma.01G123600.Wm82.a6.v1	4	segmental/WGD
Glyma.01G123900.Wm82.a6.v1	4	segmental/WGD
Glyma.01G124000.Wm82.a6.v1	4	segmental/WGD
Glyma.01G124100.Wm82.a6.v1	4	segmental/WGD
Glyma.01G124200.Wm82.a6.v1	4	segmental/WGD
Glyma.01G124300.Wm82.a6.v1	4	segmental/WGD
Glyma.01G124400.Wm82.a6.v1	4	segmental/WGD
Glyma.01G124500.Wm82.a6.v1	4	segmental/WGD
Glyma.01G124602.Wm82.a6.v1	4	segmental/WGD
Glyma.01G124700.Wm82.a6.v1	4	segmental/WGD
Glyma.01G124751.Wm82.a6.v1	4	segmental/WGD
Glyma.01G124900.Wm82.a6.v1	4	segmental/WGD
Glyma.01G125100.Wm82.a6.v1	4	segmental/WGD
Glyma.01G125200.Wm82.a6.v1	4	segmental/WGD
Glyma.01G125300.Wm82.a6.v1	4	segmental/WGD
Glyma.01G125600.Wm82.a6.v1	4	segmental/WGD
Glyma.01G125800.Wm82.a6.v1	4	segmental/WGD
Glyma.01G125900.Wm82.a6.v1	4	segmental/WGD
Glyma.01G126000.Wm82.a6.v1	4	segmental/WGD
Glyma.01G126401.Wm82.a6.v1	4	segmental/WGD
Glyma.01G126600.Wm82.a6.v1	4	segmental/WGD
Glyma.01G126801.Wm82.a6.v1	4	segmental/WGD
Glyma.01G126900.Wm82.a6.v1	4	segmental/WGD
Glyma.01G127500.Wm82.a6.v1	4	segmental/WGD
Glyma.01G127600.Wm82.a6.v1	4	segmental/WGD
Glyma.01G127900.Wm82.a6.v1	4	segmental/WGD
Glyma.01G128000.Wm82.a6.v1	4	segmental/WGD
Glyma.01G128100.Wm82.a6.v1	4	segmental/WGD
Glyma.01G128200.Wm82.a6.v1	4	segmental/WGD
Glyma.01G128300.Wm82.a6.v1	4	segmental/WGD
Glyma.01G128500.Wm82.a6.v1	4	segmental/WGD
Glyma.01G128700.Wm82.a6.v1	4	segmental/WGD
Glyma.01G129000.Wm82.a6.v1	4	segmental/WGD
Glyma.01G129200.Wm82.a6.v1	4	segmental/WGD
Glyma.01G129400.Wm82.a6.v1	4	segmental/WGD
Glyma.01G129700.Wm82.a6.v1	4	segmental/WGD
Glyma.01G130000.Wm82.a6.v1	4	segmental/WGD
Glyma.01G130500.Wm82.a6.v1	4	segmental/WGD
Glyma.01G131100.Wm82.a6.v1	4	segmental/WGD
Glyma.01G131200.Wm82.a6.v1	4	segmental/WGD
Glyma.01G131300.Wm82.a6.v1	4	segmental/WGD
Glyma.01G131400.Wm82.a6.v1	4	segmental/WGD
Glyma.01G131500.Wm82.a6.v1	4	segmental/WGD
Glyma.01G131800.Wm82.a6.v1	4	segmental/WGD
Glyma.01G131900.Wm82.a6.v1	4	segmental/WGD
Glyma.01G132000.Wm82.a6.v1	4	segmental/WGD
Glyma.01G132200.Wm82.a6.v1	4	segmental/WGD
Glyma.01G132300.Wm82.a6.v1	4	segmental/WGD
Glyma.01G132400.Wm82.a6.v1	4	segmental/WGD
Glyma.01G132500.Wm82.a6.v1	4	segmental/WGD
Glyma.01G132800.Wm82.a6.v1	4	segmental/WGD
Glyma.01G132866.Wm82.a6.v1	4	segmental/WGD
Glyma.01G133000.Wm82.a6.v1	4	segmental/WGD
Glyma.01G133200.Wm82.a6.v1	4	segmental/WGD
Glyma.01G133300.Wm82.a6.v1	4	segmental/WGD
Glyma.01G133400.Wm82.a6.v1	4	segmental/WGD
Glyma.01G133501.Wm82.a6.v1	4	segmental/WGD
Glyma.01G133900.Wm82.a6.v1	4	segmental/WGD
Glyma.01G134100.Wm82.a6.v1	4	segmental/WGD
Glyma.01G134400.Wm82.a6.v1	4	segmental/WGD
Glyma.01G134600.Wm82.a6.v1	4	segmental/WGD
Glyma.01G135200.Wm82.a6.v1	4	segmental/WGD
Glyma.01G135400.Wm82.a6.v1	4	segmental/WGD
Glyma.01G135500.Wm82.a6.v1	4	segmental/WGD
Glyma.01G135900.Wm82.a6.v1	4	segmental/WGD
Glyma.01G136000.Wm82.a6.v1	4	segmental/WGD
Glyma.01G136100.Wm82.a6.v1	4	segmental/WGD
Glyma.01G136300.Wm82.a6.v1	4	segmental/WGD
Glyma.01G136500.Wm82.a6.v1	4	segmental/WGD
Glyma.01G136600.Wm82.a6.v1	4	segmental/WGD
Glyma.01G137000.Wm82.a6.v1	4	segmental/WGD
Glyma.01G137100.Wm82.a6.v1	4	segmental/WGD
Glyma.01G137200.Wm82.a6.v1	4	segmental/WGD
Glyma.01G137300.Wm82.a6.v1	4	segmental/WGD
Glyma.01G137500.Wm82.a6.v1	4	segmental/WGD
Glyma.01G137600.Wm82.a6.v1	4	segmental/WGD
Glyma.01G137700.Wm82.a6.v1	4	segmental/WGD
Glyma.01G137900.Wm82.a6.v1	4	segmental/WGD
Glyma.01G138300.Wm82.a6.v1	4	segmental/WGD
Glyma.01G138450.Wm82.a6.v1	4	segmental/WGD
Glyma.01G138600.Wm82.a6.v1	4	segmental/WGD
Glyma.01G138800.Wm82.a6.v1	4	segmental/WGD
Glyma.01G139000.Wm82.a6.v1	4	segmental/WGD
Glyma.01G139100.Wm82.a6.v1	4	segmental/WGD
Glyma.01G139500.Wm82.a6.v1	4	segmental/WGD
Glyma.01G139600.Wm82.a6.v1	4	segmental/WGD
Glyma.01G139633.Wm82.a6.v1	4	segmental/WGD
Glyma.01G139700.Wm82.a6.v1	4	segmental/WGD
Glyma.01G139901.Wm82.a6.v1	4	segmental/WGD
Glyma.01G140200.Wm82.a6.v1	4	segmental/WGD
Glyma.01G140401.Wm82.a6.v1	4	segmental/WGD
Glyma.01G140600.Wm82.a6.v1	4	segmental/WGD
Glyma.01G140725.Wm82.a6.v1	4	segmental/WGD
Glyma.01G140850.Wm82.a6.v1	4	segmental/WGD
Glyma.01G141100.Wm82.a6.v1	4	segmental/WGD
Glyma.01G141900.Wm82.a6.v1	4	segmental/WGD
Glyma.01G142300.Wm82.a6.v1	4	segmental/WGD
Glyma.01G142400.Wm82.a6.v1	4	segmental/WGD
Glyma.01G142600.Wm82.a6.v1	4	segmental/WGD
Glyma.01G142700.Wm82.a6.v1	4	segmental/WGD
Glyma.01G142800.Wm82.a6.v1	4	segmental/WGD
Glyma.01G142900.Wm82.a6.v1	4	segmental/WGD
Glyma.01G143100.Wm82.a6.v1	4	segmental/WGD
Glyma.01G143400.Wm82.a6.v1	4	segmental/WGD
Glyma.01G143500.Wm82.a6.v1	4	segmental/WGD
Glyma.01G143700.Wm82.a6.v1	4	segmental/WGD
Glyma.01G143800.Wm82.a6.v1	4	segmental/WGD
Glyma.01G144050.Wm82.a6.v1	4	segmental/WGD
Glyma.01G144200.Wm82.a6.v1	4	segmental/WGD
Glyma.01G144300.Wm82.a6.v1	4	segmental/WGD
Glyma.01G144400.Wm82.a6.v1	4	segmental/WGD
Glyma.01G144500.Wm82.a6.v1	4	segmental/WGD
Glyma.01G144700.Wm82.a6.v1	4	segmental/WGD
Glyma.01G144800.Wm82.a6.v1	4	segmental/WGD
Glyma.01G144900.Wm82.a6.v1	4	segmental/WGD
Glyma.01G145000.Wm82.a6.v1	4	segmental/WGD
Glyma.01G145300.Wm82.a6.v1	4	segmental/WGD
Glyma.01G145400.Wm82.a6.v1	4	segmental/WGD
Glyma.01G145600.Wm82.a6.v1	4	segmental/WGD
Glyma.01G145900.Wm82.a6.v1	4	segmental/WGD
Glyma.01G146000.Wm82.a6.v1	4	segmental/WGD
Glyma.01G146100.Wm82.a6.v1	4	segmental/WGD
Glyma.01G146300.Wm82.a6.v1	4	segmental/WGD
Glyma.01G146400.Wm82.a6.v1	4	segmental/WGD
Glyma.01G146500.Wm82.a6.v1	4	segmental/WGD
Glyma.01G146600.Wm82.a6.v1	4	segmental/WGD
Glyma.01G146700.Wm82.a6.v1	4	segmental/WGD
Glyma.01G147300.Wm82.a6.v1	4	segmental/WGD
Glyma.01G147400.Wm82.a6.v1	4	segmental/WGD
Glyma.01G147500.Wm82.a6.v1	4	segmental/WGD
Glyma.01G147600.Wm82.a6.v1	4	segmental/WGD
Glyma.01G147700.Wm82.a6.v1	4	segmental/WGD
Glyma.01G147900.Wm82.a6.v1	4	segmental/WGD
Glyma.01G148001.Wm82.a6.v1	4	segmental/WGD
Glyma.01G148201.Wm82.a6.v1	4	segmental/WGD
Glyma.01G148300.Wm82.a6.v1	4	segmental/WGD
Glyma.01G148401.Wm82.a6.v1	4	segmental/WGD
Glyma.01G148500.Wm82.a6.v1	4	segmental/WGD
Glyma.01G148600.Wm82.a6.v1	4	segmental/WGD
Glyma.01G148800.Wm82.a6.v1	4	segmental/WGD
Glyma.01G148900.Wm82.a6.v1	4	segmental/WGD
Glyma.01G149000.Wm82.a6.v1	4	segmental/WGD
Glyma.01G149300.Wm82.a6.v1	4	segmental/WGD
Glyma.01G149400.Wm82.a6.v1	4	segmental/WGD
Glyma.01G149500.Wm82.a6.v1	4	segmental/WGD
Glyma.01G149700.Wm82.a6.v1	4	segmental/WGD
Glyma.01G149800.Wm82.a6.v1	4	segmental/WGD
Glyma.01G149900.Wm82.a6.v1	4	segmental/WGD
Glyma.01G150000.Wm82.a6.v1	4	segmental/WGD
Glyma.01G150100.Wm82.a6.v1	4	segmental/WGD
Glyma.01G150200.Wm82.a6.v1	4	segmental/WGD
Glyma.01G150300.Wm82.a6.v1	4	segmental/WGD
Glyma.01G150400.Wm82.a6.v1	4	segmental/WGD
Glyma.01G150500.Wm82.a6.v1	4	segmental/WGD
Glyma.01G150600.Wm82.a6.v1	4	segmental/WGD
Glyma.01G150700.Wm82.a6.v1	4	segmental/WGD
Glyma.01G150800.Wm82.a6.v1	4	segmental/WGD
Glyma.01G150900.Wm82.a6.v1	4	segmental/WGD
Glyma.01G151100.Wm82.a6.v1	4	segmental/WGD
Glyma.01G151200.Wm82.a6.v1	4	segmental/WGD
Glyma.01G151300.Wm82.a6.v1	4	segmental/WGD
Glyma.01G151400.Wm82.a6.v1	4	segmental/WGD
Glyma.01G151466.Wm82.a6.v1	4	segmental/WGD
Glyma.01G151600.Wm82.a6.v1	4	segmental/WGD
Glyma.01G151700.Wm82.a6.v1	4	segmental/WGD
Glyma.01G151800.Wm82.a6.v1	4	segmental/WGD
Glyma.01G151951.Wm82.a6.v1	4	segmental/WGD
Glyma.01G152000.Wm82.a6.v1	4	segmental/WGD
Glyma.01G152100.Wm82.a6.v1	4	segmental/WGD
Glyma.01G152200.Wm82.a6.v1	4	segmental/WGD
Glyma.01G152300.Wm82.a6.v1	4	segmental/WGD
Glyma.01G152500.Wm82.a6.v1	4	segmental/WGD
Glyma.01G152600.Wm82.a6.v1	4	segmental/WGD
Glyma.01G152700.Wm82.a6.v1	4	segmental/WGD
Glyma.01G152800.Wm82.a6.v1	4	segmental/WGD
Glyma.01G152900.Wm82.a6.v1	4	segmental/WGD
Glyma.01G153000.Wm82.a6.v1	4	segmental/WGD
Glyma.01G153100.Wm82.a6.v1	4	segmental/WGD
Glyma.01G153200.Wm82.a6.v1	4	segmental/WGD
Glyma.01G153300.Wm82.a6.v1	4	segmental/WGD
Glyma.01G153400.Wm82.a6.v1	4	segmental/WGD
Glyma.01G153600.Wm82.a6.v1	4	segmental/WGD
Glyma.01G153700.Wm82.a6.v1	4	segmental/WGD
Glyma.01G153900.Wm82.a6.v1	4	segmental/WGD
Glyma.01G153950.Wm82.a6.v1	4	segmental/WGD
Glyma.01G154000.Wm82.a6.v1	4	segmental/WGD
Glyma.01G154100.Wm82.a6.v1	4	segmental/WGD
Glyma.01G154200.Wm82.a6.v1	4	segmental/WGD
Glyma.01G154300.Wm82.a6.v1	4	segmental/WGD
Glyma.01G154400.Wm82.a6.v1	4	segmental/WGD
Glyma.01G154700.Wm82.a6.v1	4	segmental/WGD
Glyma.01G154725.Wm82.a6.v1	4	segmental/WGD
Glyma.01G154750.Wm82.a6.v1	4	segmental/WGD
Glyma.01G154900.Wm82.a6.v1	4	segmental/WGD
Glyma.01G155000.Wm82.a6.v1	4	segmental/WGD
Glyma.01G155200.Wm82.a6.v1	4	segmental/WGD
Glyma.01G155300.Wm82.a6.v1	4	segmental/WGD
Glyma.01G155400.Wm82.a6.v1	4	segmental/WGD
Glyma.01G155500.Wm82.a6.v1	4	segmental/WGD
Glyma.01G155600.Wm82.a6.v1	4	segmental/WGD
Glyma.01G155800.Wm82.a6.v1	4	segmental/WGD
Glyma.01G155900.Wm82.a6.v1	4	segmental/WGD
Glyma.01G156000.Wm82.a6.v1	4	segmental/WGD
Glyma.01G156200.Wm82.a6.v1	4	segmental/WGD
Glyma.01G156400.Wm82.a6.v1	4	segmental/WGD
Glyma.01G156500.Wm82.a6.v1	4	segmental/WGD
Glyma.01G156600.Wm82.a6.v1	4	segmental/WGD
Glyma.01G156700.Wm82.a6.v1	4	segmental/WGD
Glyma.01G156800.Wm82.a6.v1	4	segmental/WGD
Glyma.01G156900.Wm82.a6.v1	4	segmental/WGD
Glyma.01G157000.Wm82.a6.v1	4	segmental/WGD
Glyma.01G157100.Wm82.a6.v1	4	segmental/WGD
Glyma.01G157200.Wm82.a6.v1	4	segmental/WGD
Glyma.01G157300.Wm82.a6.v1	4	segmental/WGD
Glyma.01G157400.Wm82.a6.v1	4	segmental/WGD
Glyma.01G157500.Wm82.a6.v1	4	segmental/WGD
Glyma.01G157600.Wm82.a6.v1	4	segmental/WGD
Glyma.01G157700.Wm82.a6.v1	4	segmental/WGD
Glyma.01G157800.Wm82.a6.v1	4	segmental/WGD
Glyma.01G157900.Wm82.a6.v1	4	segmental/WGD
Glyma.01G158000.Wm82.a6.v1	4	segmental/WGD
Glyma.01G158100.Wm82.a6.v1	4	segmental/WGD
Glyma.01G158151.Wm82.a6.v1	4	segmental/WGD
Glyma.01G158200.Wm82.a6.v1	4	segmental/WGD
Glyma.01G158300.Wm82.a6.v1	4	segmental/WGD
Glyma.01G158400.Wm82.a6.v1	4	segmental/WGD
Glyma.01G158500.Wm82.a6.v1	4	segmental/WGD
Glyma.01G158600.Wm82.a6.v1	4	segmental/WGD
Glyma.01G158700.Wm82.a6.v1	4	segmental/WGD
Glyma.01G158900.Wm82.a6.v1	4	segmental/WGD
Glyma.01G159000.Wm82.a6.v1	4	segmental/WGD
Glyma.01G159100.Wm82.a6.v1	4	segmental/WGD
Glyma.01G159200.Wm82.a6.v1	4	segmental/WGD
Glyma.01G159400.Wm82.a6.v1	4	segmental/WGD
Glyma.01G159500.Wm82.a6.v1	4	segmental/WGD
Glyma.01G159600.Wm82.a6.v1	4	segmental/WGD
Glyma.01G159700.Wm82.a6.v1	4	segmental/WGD
Glyma.01G159800.Wm82.a6.v1	4	segmental/WGD
Glyma.01G159900.Wm82.a6.v1	4	segmental/WGD
Glyma.01G160000.Wm82.a6.v1	4	segmental/WGD
Glyma.01G160100.Wm82.a6.v1	4	segmental/WGD
Glyma.01G160200.Wm82.a6.v1	4	segmental/WGD
Glyma.01G160300.Wm82.a6.v1	4	segmental/WGD
Glyma.01G160600.Wm82.a6.v1	4	segmental/WGD
Glyma.01G161100.Wm82.a6.v1	4	segmental/WGD
Glyma.01G161200.Wm82.a6.v1	4	segmental/WGD
Glyma.01G161400.Wm82.a6.v1	4	segmental/WGD
Glyma.01G161600.Wm82.a6.v1	4	segmental/WGD
Glyma.01G161700.Wm82.a6.v1	4	segmental/WGD
Glyma.01G161800.Wm82.a6.v1	4	segmental/WGD
Glyma.01G161900.Wm82.a6.v1	4	segmental/WGD
Glyma.01G162000.Wm82.a6.v1	4	segmental/WGD
Glyma.01G162100.Wm82.a6.v1	4	segmental/WGD
Glyma.01G162150.Wm82.a6.v1	4	segmental/WGD
Glyma.01G162200.Wm82.a6.v1	4	segmental/WGD
Glyma.01G162300.Wm82.a6.v1	4	segmental/WGD
Glyma.01G162500.Wm82.a6.v1	4	segmental/WGD
Glyma.01G162600.Wm82.a6.v1	4	segmental/WGD
Glyma.01G162700.Wm82.a6.v1	4	segmental/WGD
Glyma.01G162800.Wm82.a6.v1	4	segmental/WGD
Glyma.01G162900.Wm82.a6.v1	4	segmental/WGD
Glyma.01G163000.Wm82.a6.v1	4	segmental/WGD
Glyma.01G163100.Wm82.a6.v1	4	segmental/WGD
Glyma.01G163300.Wm82.a6.v1	4	segmental/WGD
Glyma.01G163500.Wm82.a6.v1	4	segmental/WGD
Glyma.01G163600.Wm82.a6.v1	4	segmental/WGD
Glyma.01G163700.Wm82.a6.v1	4	segmental/WGD
Glyma.01G163800.Wm82.a6.v1	4	segmental/WGD
Glyma.01G163900.Wm82.a6.v1	4	segmental/WGD
Glyma.01G164000.Wm82.a6.v1	4	segmental/WGD
Glyma.01G164100.Wm82.a6.v1	4	segmental/WGD
Glyma.01G164200.Wm82.a6.v1	4	segmental/WGD
Glyma.01G164300.Wm82.a6.v1	4	segmental/WGD
Glyma.01G164400.Wm82.a6.v1	4	segmental/WGD
Glyma.01G164500.Wm82.a6.v1	4	segmental/WGD
Glyma.01G164600.Wm82.a6.v1	4	segmental/WGD
Glyma.01G164700.Wm82.a6.v1	4	segmental/WGD
Glyma.01G164800.Wm82.a6.v1	4	segmental/WGD
Glyma.01G164900.Wm82.a6.v1	4	segmental/WGD
Glyma.01G164950.Wm82.a6.v1	4	segmental/WGD
Glyma.01G165000.Wm82.a6.v1	4	segmental/WGD
Glyma.01G165100.Wm82.a6.v1	4	segmental/WGD
Glyma.01G165200.Wm82.a6.v1	4	segmental/WGD
Glyma.01G165300.Wm82.a6.v1	4	segmental/WGD
Glyma.01G165400.Wm82.a6.v1	4	segmental/WGD
Glyma.01G165701.Wm82.a6.v1	4	segmental/WGD
Glyma.01G165900.Wm82.a6.v1	4	segmental/WGD
Glyma.01G166000.Wm82.a6.v1	4	segmental/WGD
Glyma.01G166100.Wm82.a6.v1	4	segmental/WGD
Glyma.01G166200.Wm82.a6.v1	4	segmental/WGD
Glyma.01G166300.Wm82.a6.v1	4	segmental/WGD
Glyma.01G166400.Wm82.a6.v1	4	segmental/WGD
Glyma.01G166500.Wm82.a6.v1	4	segmental/WGD
Glyma.01G166600.Wm82.a6.v1	4	segmental/WGD
Glyma.01G166700.Wm82.a6.v1	4	segmental/WGD
Glyma.01G166800.Wm82.a6.v1	4	segmental/WGD
Glyma.01G166900.Wm82.a6.v1	4	segmental/WGD
Glyma.01G167000.Wm82.a6.v1	4	segmental/WGD
Glyma.01G167200.Wm82.a6.v1	4	segmental/WGD
Glyma.01G167300.Wm82.a6.v1	4	segmental/WGD
Glyma.01G167400.Wm82.a6.v1	4	segmental/WGD
Glyma.01G167500.Wm82.a6.v1	4	segmental/WGD
Glyma.01G167600.Wm82.a6.v1	4	segmental/WGD
Glyma.01G167750.Wm82.a6.v1	4	segmental/WGD
Glyma.01G167900.Wm82.a6.v1	4	segmental/WGD
Glyma.01G168000.Wm82.a6.v1	4	segmental/WGD
Glyma.01G168100.Wm82.a6.v1	4	segmental/WGD
Glyma.01G168200.Wm82.a6.v1	4	segmental/WGD
Glyma.01G168400.Wm82.a6.v1	4	segmental/WGD
Glyma.01G168500.Wm82.a6.v1	4	segmental/WGD
Glyma.01G168600.Wm82.a6.v1	4	segmental/WGD
Glyma.01G168900.Wm82.a6.v1	4	segmental/WGD
Glyma.01G169100.Wm82.a6.v1	4	segmental/WGD
Glyma.01G169200.Wm82.a6.v1	4	segmental/WGD
Glyma.01G169400.Wm82.a6.v1	4	segmental/WGD
Glyma.01G169500.Wm82.a6.v1	4	segmental/WGD
Glyma.01G169600.Wm82.a6.v1	4	segmental/WGD
Glyma.01G169700.Wm82.a6.v1	4	segmental/WGD
Glyma.01G169800.Wm82.a6.v1	4	segmental/WGD
Glyma.01G169900.Wm82.a6.v1	4	segmental/WGD
Glyma.01G170000.Wm82.a6.v1	4	segmental/WGD
Glyma.01G170100.Wm82.a6.v1	4	segmental/WGD
Glyma.01G170200.Wm82.a6.v1	4	segmental/WGD
Glyma.01G170300.Wm82.a6.v1	4	segmental/WGD
Glyma.01G170400.Wm82.a6.v1	4	segmental/WGD
Glyma.01G170600.Wm82.a6.v1	4	segmental/WGD
Glyma.01G170700.Wm82.a6.v1	4	segmental/WGD
Glyma.01G170800.Wm82.a6.v1	4	segmental/WGD
Glyma.01G170900.Wm82.a6.v1	4	segmental/WGD
Glyma.01G171000.Wm82.a6.v1	4	segmental/WGD
Glyma.01G171100.Wm82.a6.v1	4	segmental/WGD
Glyma.01G171200.Wm82.a6.v1	4	segmental/WGD
Glyma.01G171300.Wm82.a6.v1	4	segmental/WGD
Glyma.01G171600.Wm82.a6.v1	4	segmental/WGD
Glyma.01G171700.Wm82.a6.v1	4	segmental/WGD
Glyma.01G171800.Wm82.a6.v1	4	segmental/WGD
Glyma.01G171900.Wm82.a6.v1	4	segmental/WGD
Glyma.01G172000.Wm82.a6.v1	4	segmental/WGD
Glyma.01G172100.Wm82.a6.v1	4	segmental/WGD
Glyma.01G172200.Wm82.a6.v1	4	segmental/WGD
Glyma.01G172300.Wm82.a6.v1	4	segmental/WGD
Glyma.01G172400.Wm82.a6.v1	4	segmental/WGD
Glyma.01G172500.Wm82.a6.v1	4	segmental/WGD
Glyma.01G172600.Wm82.a6.v1	4	segmental/WGD
Glyma.01G211800.Wm82.a6.v1	4	segmental/WGD
Glyma.01G173000.Wm82.a6.v1	4	segmental/WGD
Glyma.01G173100.Wm82.a6.v1	4	segmental/WGD
Glyma.01G173200.Wm82.a6.v1	4	segmental/WGD
Glyma.01G173300.Wm82.a6.v1	4	segmental/WGD
Glyma.01G173400.Wm82.a6.v1	4	segmental/WGD
Glyma.01G173500.Wm82.a6.v1	4	segmental/WGD
Glyma.01G173700.Wm82.a6.v1	4	segmental/WGD
Glyma.01G173800.Wm82.a6.v1	4	segmental/WGD
Glyma.01G173900.Wm82.a6.v1	4	segmental/WGD
Glyma.01G174000.Wm82.a6.v1	4	segmental/WGD
Glyma.01G174101.Wm82.a6.v1	4	segmental/WGD
Glyma.01G174200.Wm82.a6.v1	4	segmental/WGD
Glyma.01G174400.Wm82.a6.v1	4	segmental/WGD
Glyma.01G174600.Wm82.a6.v1	4	segmental/WGD
Glyma.01G174700.Wm82.a6.v1	4	segmental/WGD
Glyma.01G174900.Wm82.a6.v1	4	segmental/WGD
Glyma.01G175000.Wm82.a6.v1	4	segmental/WGD
Glyma.01G175100.Wm82.a6.v1	4	segmental/WGD
Glyma.01G175200.Wm82.a6.v1	4	segmental/WGD
Glyma.01G175300.Wm82.a6.v1	4	segmental/WGD
Glyma.01G175400.Wm82.a6.v1	4	segmental/WGD
Glyma.01G175500.Wm82.a6.v1	4	segmental/WGD
Glyma.01G175600.Wm82.a6.v1	4	segmental/WGD
Glyma.01G175800.Wm82.a6.v1	4	segmental/WGD
Glyma.01G175900.Wm82.a6.v1	4	segmental/WGD
Glyma.01G176000.Wm82.a6.v1	4	segmental/WGD
Glyma.01G176100.Wm82.a6.v1	4	segmental/WGD
Glyma.01G176200.Wm82.a6.v1	4	segmental/WGD
Glyma.01G176300.Wm82.a6.v1	4	segmental/WGD
Glyma.01G176400.Wm82.a6.v1	4	segmental/WGD
Glyma.01G176501.Wm82.a6.v1	4	segmental/WGD
Glyma.01G176600.Wm82.a6.v1	4	segmental/WGD
Glyma.01G176700.Wm82.a6.v1	4	segmental/WGD
Glyma.01G176800.Wm82.a6.v1	4	segmental/WGD
Glyma.01G176900.Wm82.a6.v1	4	segmental/WGD
Glyma.01G177000.Wm82.a6.v1	4	segmental/WGD
Glyma.01G177101.Wm82.a6.v1	4	segmental/WGD
Glyma.01G177200.Wm82.a6.v1	4	segmental/WGD
Glyma.01G177300.Wm82.a6.v1	4	segmental/WGD
Glyma.01G177400.Wm82.a6.v1	4	segmental/WGD
Glyma.01G177500.Wm82.a6.v1	4	segmental/WGD
Glyma.01G177600.Wm82.a6.v1	4	segmental/WGD
Glyma.01G177700.Wm82.a6.v1	4	segmental/WGD
Glyma.01G177900.Wm82.a6.v1	4	segmental/WGD
Glyma.01G178000.Wm82.a6.v1	4	segmental/WGD
Glyma.01G178200.Wm82.a6.v1	4	segmental/WGD
Glyma.01G178301.Wm82.a6.v1	4	segmental/WGD
Glyma.01G178400.Wm82.a6.v1	4	segmental/WGD
Glyma.01G178500.Wm82.a6.v1	4	segmental/WGD
Glyma.01G178600.Wm82.a6.v1	4	segmental/WGD
Glyma.01G178700.Wm82.a6.v1	4	segmental/WGD
Glyma.01G178800.Wm82.a6.v1	4	segmental/WGD
Glyma.01G179000.Wm82.a6.v1	4	segmental/WGD
Glyma.01G179100.Wm82.a6.v1	4	segmental/WGD
Glyma.01G179201.Wm82.a6.v1	4	segmental/WGD
Glyma.01G179251.Wm82.a6.v1	4	segmental/WGD
Glyma.01G179300.Wm82.a6.v1	4	segmental/WGD
Glyma.01G179400.Wm82.a6.v1	4	segmental/WGD
Glyma.01G179800.Wm82.a6.v1	4	segmental/WGD
Glyma.01G179900.Wm82.a6.v1	4	segmental/WGD
Glyma.01G180000.Wm82.a6.v1	4	segmental/WGD
Glyma.01G180100.Wm82.a6.v1	4	segmental/WGD
Glyma.01G180200.Wm82.a6.v1	4	segmental/WGD
Glyma.01G180366.Wm82.a6.v1	4	segmental/WGD
Glyma.01G180432.Wm82.a6.v1	4	segmental/WGD
Glyma.01G180500.Wm82.a6.v1	4	segmental/WGD
Glyma.01G180600.Wm82.a6.v1	4	segmental/WGD
Glyma.01G180700.Wm82.a6.v1	4	segmental/WGD
Glyma.01G180800.Wm82.a6.v1	4	segmental/WGD
Glyma.01G181102.Wm82.a6.v1	4	segmental/WGD
Glyma.01G181200.Wm82.a6.v1	4	segmental/WGD
Glyma.01G181500.Wm82.a6.v1	4	segmental/WGD
Glyma.01G181600.Wm82.a6.v1	4	segmental/WGD
Glyma.01G181700.Wm82.a6.v1	4	segmental/WGD
Glyma.01G181800.Wm82.a6.v1	4	segmental/WGD
Glyma.01G181900.Wm82.a6.v1	4	segmental/WGD
Glyma.01G182000.Wm82.a6.v1	4	segmental/WGD
Glyma.01G182100.Wm82.a6.v1	4	segmental/WGD
Glyma.01G182200.Wm82.a6.v1	4	segmental/WGD
Glyma.01G182300.Wm82.a6.v1	4	segmental/WGD
Glyma.01G182400.Wm82.a6.v1	4	segmental/WGD
Glyma.01G182500.Wm82.a6.v1	4	segmental/WGD
Glyma.01G182600.Wm82.a6.v1	4	segmental/WGD
Glyma.01G182700.Wm82.a6.v1	4	segmental/WGD
Glyma.01G183000.Wm82.a6.v1	4	segmental/WGD
Glyma.01G183100.Wm82.a6.v1	4	segmental/WGD
Glyma.01G183200.Wm82.a6.v1	4	segmental/WGD
Glyma.01G183300.Wm82.a6.v1	4	segmental/WGD
Glyma.01G183400.Wm82.a6.v1	4	segmental/WGD
Glyma.01G183500.Wm82.a6.v1	4	segmental/WGD
Glyma.01G183600.Wm82.a6.v1	4	segmental/WGD
Glyma.01G183700.Wm82.a6.v1	4	segmental/WGD
Glyma.01G183800.Wm82.a6.v1	4	segmental/WGD
Glyma.01G183900.Wm82.a6.v1	4	segmental/WGD
Glyma.01G184000.Wm82.a6.v1	4	segmental/WGD
Glyma.01G184200.Wm82.a6.v1	4	segmental/WGD
Glyma.01G184300.Wm82.a6.v1	4	segmental/WGD
Glyma.01G184400.Wm82.a6.v1	4	segmental/WGD
Glyma.01G184500.Wm82.a6.v1	4	segmental/WGD
Glyma.01G184600.Wm82.a6.v1	4	segmental/WGD
Glyma.01G184700.Wm82.a6.v1	4	segmental/WGD
Glyma.01G184800.Wm82.a6.v1	4	segmental/WGD
Glyma.01G184900.Wm82.a6.v1	4	segmental/WGD
Glyma.01G185000.Wm82.a6.v1	4	segmental/WGD
Glyma.01G185100.Wm82.a6.v1	4	segmental/WGD
Glyma.01G185200.Wm82.a6.v1	4	segmental/WGD
Glyma.01G185300.Wm82.a6.v1	4	segmental/WGD
Glyma.01G185400.Wm82.a6.v1	4	segmental/WGD
Glyma.01G185500.Wm82.a6.v1	4	segmental/WGD
Glyma.01G185600.Wm82.a6.v1	4	segmental/WGD
Glyma.01G185700.Wm82.a6.v1	4	segmental/WGD
Glyma.01G185800.Wm82.a6.v1	4	segmental/WGD
Glyma.01G185900.Wm82.a6.v1	4	segmental/WGD
Glyma.01G186000.Wm82.a6.v1	4	segmental/WGD
Glyma.01G186100.Wm82.a6.v1	4	segmental/WGD
Glyma.01G186201.Wm82.a6.v1	4	segmental/WGD
Glyma.01G186300.Wm82.a6.v1	4	segmental/WGD
Glyma.01G186400.Wm82.a6.v1	4	segmental/WGD
Glyma.01G186600.Wm82.a6.v1	4	segmental/WGD
Glyma.01G186700.Wm82.a6.v1	4	segmental/WGD
Glyma.01G186800.Wm82.a6.v1	4	segmental/WGD
Glyma.01G186900.Wm82.a6.v1	4	segmental/WGD
Glyma.01G187100.Wm82.a6.v1	4	segmental/WGD
Glyma.01G187200.Wm82.a6.v1	4	segmental/WGD
Glyma.01G187300.Wm82.a6.v1	4	segmental/WGD
Glyma.01G187500.Wm82.a6.v1	4	segmental/WGD
Glyma.01G187600.Wm82.a6.v1	4	segmental/WGD
Glyma.01G187700.Wm82.a6.v1	4	segmental/WGD
Glyma.01G187800.Wm82.a6.v1	4	segmental/WGD
Glyma.01G187900.Wm82.a6.v1	4	segmental/WGD
Glyma.01G188000.Wm82.a6.v1	4	segmental/WGD
Glyma.01G188100.Wm82.a6.v1	4	segmental/WGD
Glyma.01G188200.Wm82.a6.v1	4	segmental/WGD
Glyma.01G188400.Wm82.a6.v1	4	segmental/WGD
Glyma.01G188500.Wm82.a6.v1	4	segmental/WGD
Glyma.01G188600.Wm82.a6.v1	4	segmental/WGD
Glyma.01G188700.Wm82.a6.v1	4	segmental/WGD
Glyma.01G188832.Wm82.a6.v1	4	segmental/WGD
Glyma.01G188900.Wm82.a6.v1	4	segmental/WGD
Glyma.01G189000.Wm82.a6.v1	4	segmental/WGD
Glyma.01G189100.Wm82.a6.v1	4	segmental/WGD
Glyma.01G189200.Wm82.a6.v1	4	segmental/WGD
Glyma.01G189300.Wm82.a6.v1	4	segmental/WGD
Glyma.01G189400.Wm82.a6.v1	4	segmental/WGD
Glyma.01G189500.Wm82.a6.v1	4	segmental/WGD
Glyma.01G189600.Wm82.a6.v1	4	segmental/WGD
Glyma.01G189700.Wm82.a6.v1	4	segmental/WGD
Glyma.01G189800.Wm82.a6.v1	4	segmental/WGD
Glyma.01G190000.Wm82.a6.v1	4	segmental/WGD
Glyma.01G190100.Wm82.a6.v1	4	segmental/WGD
Glyma.01G190300.Wm82.a6.v1	4	segmental/WGD
Glyma.01G190351.Wm82.a6.v1	4	segmental/WGD
Glyma.01G190402.Wm82.a6.v1	4	segmental/WGD
Glyma.01G190500.Wm82.a6.v1	4	segmental/WGD
Glyma.01G190600.Wm82.a6.v1	4	segmental/WGD
Glyma.01G190700.Wm82.a6.v1	4	segmental/WGD
Glyma.01G190800.Wm82.a6.v1	4	segmental/WGD
Glyma.01G190900.Wm82.a6.v1	4	segmental/WGD
Glyma.01G191001.Wm82.a6.v1	4	segmental/WGD
Glyma.01G191100.Wm82.a6.v1	4	segmental/WGD
Glyma.01G191200.Wm82.a6.v1	4	segmental/WGD
Glyma.01G191300.Wm82.a6.v1	4	segmental/WGD
Glyma.01G191400.Wm82.a6.v1	4	segmental/WGD
Glyma.01G191500.Wm82.a6.v1	4	segmental/WGD
Glyma.01G191600.Wm82.a6.v1	4	segmental/WGD
Glyma.01G191700.Wm82.a6.v1	4	segmental/WGD
Glyma.01G191800.Wm82.a6.v1	4	segmental/WGD
Glyma.01G191900.Wm82.a6.v1	4	segmental/WGD
Glyma.01G192000.Wm82.a6.v1	4	segmental/WGD
Glyma.01G192100.Wm82.a6.v1	4	segmental/WGD
Glyma.01G192200.Wm82.a6.v1	4	segmental/WGD
Glyma.01G192300.Wm82.a6.v1	4	segmental/WGD
Glyma.01G192400.Wm82.a6.v1	4	segmental/WGD
Glyma.01G192500.Wm82.a6.v1	4	segmental/WGD
Glyma.01G192600.Wm82.a6.v1	4	segmental/WGD
Glyma.01G192900.Wm82.a6.v1	4	segmental/WGD
Glyma.01G193000.Wm82.a6.v1	4	segmental/WGD
Glyma.01G193100.Wm82.a6.v1	4	segmental/WGD
Glyma.01G193200.Wm82.a6.v1	4	segmental/WGD
Glyma.01G193400.Wm82.a6.v1	4	segmental/WGD
Glyma.01G193500.Wm82.a6.v1	4	segmental/WGD
Glyma.01G193600.Wm82.a6.v1	4	segmental/WGD
Glyma.01G193700.Wm82.a6.v1	4	segmental/WGD
Glyma.01G193800.Wm82.a6.v1	4	segmental/WGD
Glyma.01G193900.Wm82.a6.v1	4	segmental/WGD
Glyma.01G193950.Wm82.a6.v1	4	segmental/WGD
Glyma.01G194100.Wm82.a6.v1	4	segmental/WGD
Glyma.01G194200.Wm82.a6.v1	4	segmental/WGD
Glyma.01G194300.Wm82.a6.v1	4	segmental/WGD
Glyma.01G194500.Wm82.a6.v1	4	segmental/WGD
Glyma.01G194600.Wm82.a6.v1	4	segmental/WGD
Glyma.01G194700.Wm82.a6.v1	4	segmental/WGD
Glyma.01G194800.Wm82.a6.v1	4	segmental/WGD
Glyma.01G194900.Wm82.a6.v1	4	segmental/WGD
Glyma.01G195000.Wm82.a6.v1	4	segmental/WGD
Glyma.01G195101.Wm82.a6.v1	4	segmental/WGD
Glyma.01G195200.Wm82.a6.v1	4	segmental/WGD
Glyma.01G195300.Wm82.a6.v1	4	segmental/WGD
Glyma.01G195400.Wm82.a6.v1	4	segmental/WGD
Glyma.01G195500.Wm82.a6.v1	4	segmental/WGD
Glyma.01G195600.Wm82.a6.v1	4	segmental/WGD
Glyma.01G195700.Wm82.a6.v1	4	segmental/WGD
Glyma.01G195800.Wm82.a6.v1	4	segmental/WGD
Glyma.01G195900.Wm82.a6.v1	4	segmental/WGD
Glyma.01G196000.Wm82.a6.v1	4	segmental/WGD
Glyma.01G196100.Wm82.a6.v1	4	segmental/WGD
Glyma.01G196200.Wm82.a6.v1	4	segmental/WGD
Glyma.01G196300.Wm82.a6.v1	4	segmental/WGD
Glyma.01G196401.Wm82.a6.v1	4	segmental/WGD
Glyma.01G196600.Wm82.a6.v1	4	segmental/WGD
Glyma.01G196800.Wm82.a6.v1	4	segmental/WGD
Glyma.01G196900.Wm82.a6.v1	4	segmental/WGD
Glyma.01G197100.Wm82.a6.v1	4	segmental/WGD
Glyma.01G197300.Wm82.a6.v1	4	segmental/WGD
Glyma.01G197400.Wm82.a6.v1	4	segmental/WGD
Glyma.01G197500.Wm82.a6.v1	4	segmental/WGD
Glyma.01G197600.Wm82.a6.v1	4	segmental/WGD
Glyma.01G197700.Wm82.a6.v1	4	segmental/WGD
Glyma.01G197800.Wm82.a6.v1	4	segmental/WGD
Glyma.01G197900.Wm82.a6.v1	4	segmental/WGD
Glyma.01G198000.Wm82.a6.v1	4	segmental/WGD
Glyma.01G198300.Wm82.a6.v1	4	segmental/WGD
Glyma.01G198500.Wm82.a6.v1	4	segmental/WGD
Glyma.01G198600.Wm82.a6.v1	4	segmental/WGD
Glyma.01G198700.Wm82.a6.v1	4	segmental/WGD
Glyma.01G198800.Wm82.a6.v1	4	segmental/WGD
Glyma.01G199000.Wm82.a6.v1	4	segmental/WGD
Glyma.01G199100.Wm82.a6.v1	4	segmental/WGD
Glyma.01G199200.Wm82.a6.v1	4	segmental/WGD
Glyma.01G199400.Wm82.a6.v1	4	segmental/WGD
Glyma.01G199600.Wm82.a6.v1	4	segmental/WGD
Glyma.01G199700.Wm82.a6.v1	4	segmental/WGD
Glyma.01G199800.Wm82.a6.v1	4	segmental/WGD
Glyma.01G199900.Wm82.a6.v1	4	segmental/WGD
Glyma.01G200000.Wm82.a6.v1	4	segmental/WGD
Glyma.01G200100.Wm82.a6.v1	4	segmental/WGD
Glyma.01G200200.Wm82.a6.v1	4	segmental/WGD
Glyma.01G200300.Wm82.a6.v1	4	segmental/WGD
Glyma.01G200400.Wm82.a6.v1	4	segmental/WGD
Glyma.01G200501.Wm82.a6.v1	4	segmental/WGD
Glyma.01G200600.Wm82.a6.v1	4	segmental/WGD
Glyma.01G200700.Wm82.a6.v1	4	segmental/WGD
Glyma.01G200800.Wm82.a6.v1	4	segmental/WGD
Glyma.01G200900.Wm82.a6.v1	4	segmental/WGD
Glyma.01G201100.Wm82.a6.v1	4	segmental/WGD
Glyma.01G201800.Wm82.a6.v1	4	segmental/WGD
Glyma.01G202000.Wm82.a6.v1	4	segmental/WGD
Glyma.01G202100.Wm82.a6.v1	4	segmental/WGD
Glyma.01G202200.Wm82.a6.v1	4	segmental/WGD
Glyma.01G202302.Wm82.a6.v1	4	segmental/WGD
Glyma.01G202400.Wm82.a6.v1	4	segmental/WGD
Glyma.01G202500.Wm82.a6.v1	4	segmental/WGD
Glyma.01G202600.Wm82.a6.v1	4	segmental/WGD
Glyma.01G202700.Wm82.a6.v1	4	segmental/WGD
Glyma.01G202800.Wm82.a6.v1	4	segmental/WGD
Glyma.01G203000.Wm82.a6.v1	4	segmental/WGD
Glyma.01G203100.Wm82.a6.v1	4	segmental/WGD
Glyma.01G203200.Wm82.a6.v1	4	segmental/WGD
Glyma.01G203300.Wm82.a6.v1	4	segmental/WGD
Glyma.01G203400.Wm82.a6.v1	4	segmental/WGD
Glyma.01G203500.Wm82.a6.v1	4	segmental/WGD
Glyma.01G203600.Wm82.a6.v1	4	segmental/WGD
Glyma.01G203800.Wm82.a6.v1	4	segmental/WGD
Glyma.01G204000.Wm82.a6.v1	4	segmental/WGD
Glyma.01G204200.Wm82.a6.v1	4	segmental/WGD
Glyma.01G204300.Wm82.a6.v1	4	segmental/WGD
Glyma.01G204400.Wm82.a6.v1	4	segmental/WGD
Glyma.01G204600.Wm82.a6.v1	4	segmental/WGD
Glyma.01G204700.Wm82.a6.v1	4	segmental/WGD
Glyma.01G204800.Wm82.a6.v1	4	segmental/WGD
Glyma.01G204900.Wm82.a6.v1	4	segmental/WGD
Glyma.01G205100.Wm82.a6.v1	4	segmental/WGD
Glyma.01G205200.Wm82.a6.v1	4	segmental/WGD
Glyma.01G205300.Wm82.a6.v1	4	segmental/WGD
Glyma.01G205400.Wm82.a6.v1	4	segmental/WGD
Glyma.01G205500.Wm82.a6.v1	4	segmental/WGD
Glyma.01G205600.Wm82.a6.v1	4	segmental/WGD
Glyma.01G205700.Wm82.a6.v1	4	segmental/WGD
Glyma.01G205800.Wm82.a6.v1	4	segmental/WGD
Glyma.01G205900.Wm82.a6.v1	4	segmental/WGD
Glyma.01G206000.Wm82.a6.v1	4	segmental/WGD
Glyma.01G206200.Wm82.a6.v1	4	segmental/WGD
Glyma.01G206500.Wm82.a6.v1	4	segmental/WGD
Glyma.01G206400.Wm82.a6.v1	4	segmental/WGD
Glyma.01G206600.Wm82.a6.v1	4	segmental/WGD
Glyma.01G206800.Wm82.a6.v1	4	segmental/WGD
Glyma.01G207000.Wm82.a6.v1	4	segmental/WGD
Glyma.01G207100.Wm82.a6.v1	4	segmental/WGD
Glyma.01G207200.Wm82.a6.v1	4	segmental/WGD
Glyma.01G207300.Wm82.a6.v1	4	segmental/WGD
Glyma.01G207400.Wm82.a6.v1	4	segmental/WGD
Glyma.01G207500.Wm82.a6.v1	4	segmental/WGD
Glyma.01G207600.Wm82.a6.v1	4	segmental/WGD
Glyma.01G207700.Wm82.a6.v1	4	segmental/WGD
Glyma.01G207800.Wm82.a6.v1	4	segmental/WGD
Glyma.01G207900.Wm82.a6.v1	4	segmental/WGD
Glyma.01G208000.Wm82.a6.v1	4	segmental/WGD
Glyma.01G208100.Wm82.a6.v1	4	segmental/WGD
Glyma.01G208200.Wm82.a6.v1	4	segmental/WGD
Glyma.01G208300.Wm82.a6.v1	4	segmental/WGD
Glyma.01G208400.Wm82.a6.v1	4	segmental/WGD
Glyma.01G208600.Wm82.a6.v1	4	segmental/WGD
Glyma.01G208700.Wm82.a6.v1	4	segmental/WGD
Glyma.01G208800.Wm82.a6.v1	4	segmental/WGD
Glyma.01G208900.Wm82.a6.v1	4	segmental/WGD
Glyma.01G209000.Wm82.a6.v1	4	segmental/WGD
Glyma.01G209100.Wm82.a6.v1	4	segmental/WGD
Glyma.01G209200.Wm82.a6.v1	4	segmental/WGD
Glyma.01G209400.Wm82.a6.v1	4	segmental/WGD
Glyma.01G209500.Wm82.a6.v1	4	segmental/WGD
Glyma.01G209600.Wm82.a6.v1	4	segmental/WGD
Glyma.01G209700.Wm82.a6.v1	4	segmental/WGD
Glyma.01G209800.Wm82.a6.v1	4	segmental/WGD
Glyma.01G209900.Wm82.a6.v1	4	segmental/WGD
Glyma.01G210100.Wm82.a6.v1	4	segmental/WGD
Glyma.01G210200.Wm82.a6.v1	4	segmental/WGD
Glyma.01G210300.Wm82.a6.v1	4	segmental/WGD
Glyma.01G210400.Wm82.a6.v1	4	segmental/WGD
Glyma.01G210500.Wm82.a6.v1	4	segmental/WGD
Glyma.01G210600.Wm82.a6.v1	4	segmental/WGD
Glyma.01G210700.Wm82.a6.v1	4	segmental/WGD
Glyma.01G210800.Wm82.a6.v1	4	segmental/WGD
Glyma.01G211000.Wm82.a6.v1	4	segmental/WGD
Glyma.01G211200.Wm82.a6.v1	4	segmental/WGD
Glyma.01G211300.Wm82.a6.v1	4	segmental/WGD
Glyma.01G211401.Wm82.a6.v1	4	segmental/WGD
Glyma.01G211500.Wm82.a6.v1	4	segmental/WGD
Glyma.01G211700.Wm82.a6.v1	4	segmental/WGD
Glyma.01G211900.Wm82.a6.v1	4	segmental/WGD
Glyma.01G212000.Wm82.a6.v1	4	segmental/WGD
Glyma.01G212100.Wm82.a6.v1	4	segmental/WGD
Glyma.01G212200.Wm82.a6.v1	4	segmental/WGD
Glyma.01G212300.Wm82.a6.v1	4	segmental/WGD
Glyma.01G212400.Wm82.a6.v1	4	segmental/WGD
Glyma.01G212500.Wm82.a6.v1	4	segmental/WGD
Glyma.01G212700.Wm82.a6.v1	4	segmental/WGD
Glyma.01G212800.Wm82.a6.v1	4	segmental/WGD
Glyma.01G212900.Wm82.a6.v1	4	segmental/WGD
Glyma.01G213000.Wm82.a6.v1	4	segmental/WGD
Glyma.01G213100.Wm82.a6.v1	4	segmental/WGD
Glyma.01G213200.Wm82.a6.v1	4	segmental/WGD
Glyma.01G213300.Wm82.a6.v1	4	segmental/WGD
Glyma.01G213400.Wm82.a6.v1	4	segmental/WGD
Glyma.01G213500.Wm82.a6.v1	4	segmental/WGD
Glyma.01G213600.Wm82.a6.v1	4	segmental/WGD
Glyma.01G213700.Wm82.a6.v1	4	segmental/WGD
Glyma.01G213800.Wm82.a6.v1	4	segmental/WGD
Glyma.01G213900.Wm82.a6.v1	4	segmental/WGD
Glyma.01G214100.Wm82.a6.v1	4	segmental/WGD
Glyma.01G214200.Wm82.a6.v1	4	segmental/WGD
Glyma.01G214300.Wm82.a6.v1	4	segmental/WGD
Glyma.01G214400.Wm82.a6.v1	4	segmental/WGD
Glyma.01G214500.Wm82.a6.v1	4	segmental/WGD
Glyma.01G214600.Wm82.a6.v1	4	segmental/WGD
Glyma.01G214700.Wm82.a6.v1	4	segmental/WGD
Glyma.01G214800.Wm82.a6.v1	4	segmental/WGD
Glyma.01G215100.Wm82.a6.v1	4	segmental/WGD
Glyma.01G215400.Wm82.a6.v1	4	segmental/WGD
Glyma.01G215500.Wm82.a6.v1	4	segmental/WGD
Glyma.01G215600.Wm82.a6.v1	4	segmental/WGD
Glyma.01G215700.Wm82.a6.v1	4	segmental/WGD
Glyma.01G215800.Wm82.a6.v1	4	segmental/WGD
Glyma.01G215900.Wm82.a6.v1	4	segmental/WGD
Glyma.01G216000.Wm82.a6.v1	4	segmental/WGD
Glyma.01G216400.Wm82.a6.v1	4	segmental/WGD
Glyma.01G216500.Wm82.a6.v1	4	segmental/WGD
Glyma.01G216600.Wm82.a6.v1	4	segmental/WGD
Glyma.01G216900.Wm82.a6.v1	4	segmental/WGD
Glyma.01G216933.Wm82.a6.v1	4	segmental/WGD
Glyma.01G217000.Wm82.a6.v1	4	segmental/WGD
Glyma.01G217100.Wm82.a6.v1	4	segmental/WGD
Glyma.01G217200.Wm82.a6.v1	4	segmental/WGD
Glyma.01G217300.Wm82.a6.v1	4	segmental/WGD
Glyma.01G217400.Wm82.a6.v1	4	segmental/WGD
Glyma.01G217500.Wm82.a6.v1	4	segmental/WGD
Glyma.01G217600.Wm82.a6.v1	4	segmental/WGD
Glyma.01G217800.Wm82.a6.v1	4	segmental/WGD
Glyma.01G217900.Wm82.a6.v1	4	segmental/WGD
Glyma.01G218000.Wm82.a6.v1	4	segmental/WGD
Glyma.01G218100.Wm82.a6.v1	4	segmental/WGD
Glyma.01G218200.Wm82.a6.v1	4	segmental/WGD
Glyma.01G218300.Wm82.a6.v1	4	segmental/WGD
Glyma.01G218400.Wm82.a6.v1	4	segmental/WGD
Glyma.01G218600.Wm82.a6.v1	4	segmental/WGD
Glyma.01G218800.Wm82.a6.v1	4	segmental/WGD
Glyma.01G218900.Wm82.a6.v1	4	segmental/WGD
Glyma.01G219002.Wm82.a6.v1	4	segmental/WGD
Glyma.01G219200.Wm82.a6.v1	4	segmental/WGD
Glyma.01G219300.Wm82.a6.v1	4	segmental/WGD
Glyma.01G219400.Wm82.a6.v1	4	segmental/WGD
Glyma.01G219600.Wm82.a6.v1	4	segmental/WGD
Glyma.01G219700.Wm82.a6.v1	4	segmental/WGD
Glyma.01G219800.Wm82.a6.v1	4	segmental/WGD
Glyma.01G219900.Wm82.a6.v1	4	segmental/WGD
Glyma.01G220100.Wm82.a6.v1	4	segmental/WGD
Glyma.01G220250.Wm82.a6.v1	4	segmental/WGD
Glyma.01G220400.Wm82.a6.v1	4	segmental/WGD
Glyma.01G220600.Wm82.a6.v1	4	segmental/WGD
Glyma.01G220700.Wm82.a6.v1	4	segmental/WGD
Glyma.01G220800.Wm82.a6.v1	4	segmental/WGD
Glyma.01G220900.Wm82.a6.v1	4	segmental/WGD
Glyma.01G221000.Wm82.a6.v1	4	segmental/WGD
Glyma.01G221100.Wm82.a6.v1	4	segmental/WGD
Glyma.01G221200.Wm82.a6.v1	4	segmental/WGD
Glyma.01G221300.Wm82.a6.v1	4	segmental/WGD
Glyma.01G221500.Wm82.a6.v1	4	segmental/WGD
Glyma.01G221550.Wm82.a6.v1	4	segmental/WGD
Glyma.01G221600.Wm82.a6.v1	4	segmental/WGD
Glyma.01G221700.Wm82.a6.v1	4	segmental/WGD
Glyma.01G221900.Wm82.a6.v1	4	segmental/WGD
Glyma.01G222000.Wm82.a6.v1	4	segmental/WGD
Glyma.01G222100.Wm82.a6.v1	4	segmental/WGD
Glyma.01G222200.Wm82.a6.v1	4	segmental/WGD
Glyma.01G222300.Wm82.a6.v1	4	segmental/WGD
Glyma.01G222400.Wm82.a6.v1	4	segmental/WGD
Glyma.01G222500.Wm82.a6.v1	4	segmental/WGD
Glyma.01G222600.Wm82.a6.v1	4	segmental/WGD
Glyma.01G222700.Wm82.a6.v1	4	segmental/WGD
Glyma.01G222800.Wm82.a6.v1	4	segmental/WGD
Glyma.01G222900.Wm82.a6.v1	4	segmental/WGD
Glyma.01G223000.Wm82.a6.v1	4	segmental/WGD
Glyma.01G223100.Wm82.a6.v1	4	segmental/WGD
Glyma.01G223200.Wm82.a6.v1	4	segmental/WGD
Glyma.01G223300.Wm82.a6.v1	4	segmental/WGD
Glyma.01G223400.Wm82.a6.v1	4	segmental/WGD
Glyma.01G223500.Wm82.a6.v1	4	segmental/WGD
Glyma.01G223600.Wm82.a6.v1	4	segmental/WGD
Glyma.01G223700.Wm82.a6.v1	4	segmental/WGD
Glyma.01G223800.Wm82.a6.v1	4	segmental/WGD
Glyma.01G223850.Wm82.a6.v1	4	segmental/WGD
Glyma.01G223900.Wm82.a6.v1	4	segmental/WGD
Glyma.01G224000.Wm82.a6.v1	4	segmental/WGD
Glyma.01G224100.Wm82.a6.v1	4	segmental/WGD
Glyma.01G224150.Wm82.a6.v1	4	segmental/WGD
Glyma.01G224200.Wm82.a6.v1	4	segmental/WGD
Glyma.01G224300.Wm82.a6.v1	4	segmental/WGD
Glyma.01G224400.Wm82.a6.v1	4	segmental/WGD
Glyma.01G224500.Wm82.a6.v1	4	segmental/WGD
Glyma.01G224600.Wm82.a6.v1	4	segmental/WGD
Glyma.01G224700.Wm82.a6.v1	4	segmental/WGD
Glyma.01G224800.Wm82.a6.v1	4	segmental/WGD
Glyma.01G224900.Wm82.a6.v1	4	segmental/WGD
Glyma.01G225000.Wm82.a6.v1	4	segmental/WGD
Glyma.01G225100.Wm82.a6.v1	4	segmental/WGD
Glyma.01G225200.Wm82.a6.v1	4	segmental/WGD
Glyma.01G225300.Wm82.a6.v1	4	segmental/WGD
Glyma.01G225400.Wm82.a6.v1	4	segmental/WGD
Glyma.01G225500.Wm82.a6.v1	4	segmental/WGD
Glyma.01G225600.Wm82.a6.v1	4	segmental/WGD
Glyma.01G225700.Wm82.a6.v1	4	segmental/WGD
Glyma.01G225800.Wm82.a6.v1	4	segmental/WGD
Glyma.01G225900.Wm82.a6.v1	4	segmental/WGD
Glyma.01G226000.Wm82.a6.v1	4	segmental/WGD
Glyma.01G226100.Wm82.a6.v1	4	segmental/WGD
Glyma.01G226200.Wm82.a6.v1	4	segmental/WGD
Glyma.01G226300.Wm82.a6.v1	4	segmental/WGD
Glyma.01G226502.Wm82.a6.v1	4	segmental/WGD
Glyma.01G226600.Wm82.a6.v1	4	segmental/WGD
Glyma.01G226700.Wm82.a6.v1	4	segmental/WGD
Glyma.01G226800.Wm82.a6.v1	4	segmental/WGD
Glyma.01G226900.Wm82.a6.v1	4	segmental/WGD
Glyma.01G227000.Wm82.a6.v1	4	segmental/WGD
Glyma.01G227100.Wm82.a6.v1	4	segmental/WGD
Glyma.01G227200.Wm82.a6.v1	4	segmental/WGD
Glyma.01G227300.Wm82.a6.v1	4	segmental/WGD
Glyma.01G227400.Wm82.a6.v1	4	segmental/WGD
Glyma.01G227500.Wm82.a6.v1	4	segmental/WGD
Glyma.01G227700.Wm82.a6.v1	4	segmental/WGD
Glyma.01G227800.Wm82.a6.v1	4	segmental/WGD
Glyma.01G227900.Wm82.a6.v1	4	segmental/WGD
Glyma.01G228000.Wm82.a6.v1	4	segmental/WGD
Glyma.01G228100.Wm82.a6.v1	4	segmental/WGD
Glyma.01G228200.Wm82.a6.v1	4	segmental/WGD
Glyma.01G228300.Wm82.a6.v1	4	segmental/WGD
Glyma.01G228400.Wm82.a6.v1	4	segmental/WGD
Glyma.01G228500.Wm82.a6.v1	4	segmental/WGD
Glyma.01G228700.Wm82.a6.v1	4	segmental/WGD
Glyma.01G228800.Wm82.a6.v1	4	segmental/WGD
Glyma.01G228900.Wm82.a6.v1	4	segmental/WGD
Glyma.01G229000.Wm82.a6.v1	4	segmental/WGD
Glyma.01G229132.Wm82.a6.v1	4	segmental/WGD
Glyma.01G229200.Wm82.a6.v1	4	segmental/WGD
Glyma.01G229300.Wm82.a6.v1	4	segmental/WGD
Glyma.01G229400.Wm82.a6.v1	4	segmental/WGD
Glyma.01G229500.Wm82.a6.v1	4	segmental/WGD
Glyma.01G229600.Wm82.a6.v1	4	segmental/WGD
Glyma.01G229700.Wm82.a6.v1	4	segmental/WGD
Glyma.01G229800.Wm82.a6.v1	4	segmental/WGD
Glyma.01G229900.Wm82.a6.v1	4	segmental/WGD
Glyma.01G230000.Wm82.a6.v1	4	segmental/WGD
Glyma.01G230200.Wm82.a6.v1	4	segmental/WGD
Glyma.01G230400.Wm82.a6.v1	4	segmental/WGD
Glyma.01G230500.Wm82.a6.v1	4	segmental/WGD
Glyma.01G230600.Wm82.a6.v1	4	segmental/WGD
Glyma.01G230700.Wm82.a6.v1	4	segmental/WGD
Glyma.01G230800.Wm82.a6.v1	4	segmental/WGD
Glyma.01G230900.Wm82.a6.v1	4	segmental/WGD
Glyma.01G231000.Wm82.a6.v1	4	segmental/WGD
Glyma.01G231300.Wm82.a6.v1	4	segmental/WGD
Glyma.01G231400.Wm82.a6.v1	4	segmental/WGD
Glyma.01G231500.Wm82.a6.v1	4	segmental/WGD
Glyma.01G231600.Wm82.a6.v1	4	segmental/WGD
Glyma.01G231700.Wm82.a6.v1	4	segmental/WGD
Glyma.01G231800.Wm82.a6.v1	4	segmental/WGD
Glyma.01G232000.Wm82.a6.v1	4	segmental/WGD
Glyma.01G232100.Wm82.a6.v1	4	segmental/WGD
Glyma.01G232300.Wm82.a6.v1	4	segmental/WGD
Glyma.01G232500.Wm82.a6.v1	4	segmental/WGD
Glyma.01G232600.Wm82.a6.v1	4	segmental/WGD
Glyma.01G232951.Wm82.a6.v1	4	segmental/WGD
Glyma.01G233000.Wm82.a6.v1	4	segmental/WGD
Glyma.01G233100.Wm82.a6.v1	4	segmental/WGD
Glyma.01G233200.Wm82.a6.v1	4	segmental/WGD
Glyma.01G233300.Wm82.a6.v1	4	segmental/WGD
Glyma.01G233400.Wm82.a6.v1	4	segmental/WGD
Glyma.01G233500.Wm82.a6.v1	4	segmental/WGD
Glyma.01G233600.Wm82.a6.v1	4	segmental/WGD
Glyma.01G233700.Wm82.a6.v1	4	segmental/WGD
Glyma.01G233900.Wm82.a6.v1	4	segmental/WGD
Glyma.01G233950.Wm82.a6.v1	4	segmental/WGD
Glyma.01G234000.Wm82.a6.v1	4	segmental/WGD
Glyma.01G234100.Wm82.a6.v1	4	segmental/WGD
Glyma.01G234200.Wm82.a6.v1	4	segmental/WGD
Glyma.01G234300.Wm82.a6.v1	4	segmental/WGD
Glyma.01G234400.Wm82.a6.v1	4	segmental/WGD
Glyma.01G234500.Wm82.a6.v1	4	segmental/WGD
Glyma.01G234600.Wm82.a6.v1	4	segmental/WGD
Glyma.01G234700.Wm82.a6.v1	4	segmental/WGD
Glyma.01G234800.Wm82.a6.v1	4	segmental/WGD
Glyma.01G234900.Wm82.a6.v1	4	segmental/WGD
Glyma.01G235300.Wm82.a6.v1	4	segmental/WGD
Glyma.01G235450.Wm82.a6.v1	4	segmental/WGD
Glyma.01G235700.Wm82.a6.v1	4	segmental/WGD
Glyma.01G235800.Wm82.a6.v1	4	segmental/WGD
Glyma.01G235900.Wm82.a6.v1	4	segmental/WGD
Glyma.01G236000.Wm82.a6.v1	4	segmental/WGD
Glyma.01G236100.Wm82.a6.v1	4	segmental/WGD
Glyma.01G236300.Wm82.a6.v1	4	segmental/WGD
Glyma.01G236400.Wm82.a6.v1	4	segmental/WGD
Glyma.01G236500.Wm82.a6.v1	4	segmental/WGD
Glyma.01G236600.Wm82.a6.v1	4	segmental/WGD
Glyma.01G236800.Wm82.a6.v1	4	segmental/WGD
Glyma.01G237000.Wm82.a6.v1	4	segmental/WGD
Glyma.01G237100.Wm82.a6.v1	4	segmental/WGD
Glyma.01G237200.Wm82.a6.v1	4	segmental/WGD
Glyma.01G237300.Wm82.a6.v1	4	segmental/WGD
Glyma.01G237400.Wm82.a6.v1	4	segmental/WGD
Glyma.01G237900.Wm82.a6.v1	4	segmental/WGD
Glyma.01G238000.Wm82.a6.v1	4	segmental/WGD
Glyma.01G238100.Wm82.a6.v1	4	segmental/WGD
Glyma.01G238200.Wm82.a6.v1	4	segmental/WGD
Glyma.01G238500.Wm82.a6.v1	4	segmental/WGD
Glyma.01G238700.Wm82.a6.v1	4	segmental/WGD
Glyma.01G238800.Wm82.a6.v1	4	segmental/WGD
Glyma.01G238900.Wm82.a6.v1	4	segmental/WGD
Glyma.01G239000.Wm82.a6.v1	4	segmental/WGD
Glyma.01G239200.Wm82.a6.v1	4	segmental/WGD
Glyma.01G239300.Wm82.a6.v1	4	segmental/WGD
Glyma.01G239400.Wm82.a6.v1	4	segmental/WGD
Glyma.01G239700.Wm82.a6.v1	4	segmental/WGD
Glyma.01G239800.Wm82.a6.v1	4	segmental/WGD
Glyma.01G239900.Wm82.a6.v1	4	segmental/WGD
Glyma.01G240000.Wm82.a6.v1	4	segmental/WGD
Glyma.01G240100.Wm82.a6.v1	4	segmental/WGD
Glyma.01G240167.Wm82.a6.v1	4	segmental/WGD
Glyma.01G240500.Wm82.a6.v1	4	segmental/WGD
Glyma.01G240800.Wm82.a6.v1	4	segmental/WGD
Glyma.01G240900.Wm82.a6.v1	4	segmental/WGD
Glyma.01G241000.Wm82.a6.v1	4	segmental/WGD
Glyma.01G241300.Wm82.a6.v1	4	segmental/WGD
Glyma.01G241550.Wm82.a6.v1	4	segmental/WGD
Glyma.01G241800.Wm82.a6.v1	4	segmental/WGD
Glyma.01G241900.Wm82.a6.v1	4	segmental/WGD
Glyma.01G242000.Wm82.a6.v1	4	segmental/WGD
Glyma.01G242100.Wm82.a6.v1	4	segmental/WGD
Glyma.01G242200.Wm82.a6.v1	4	segmental/WGD
Glyma.01G242400.Wm82.a6.v1	4	segmental/WGD
Glyma.01G242500.Wm82.a6.v1	4	segmental/WGD
Glyma.01G242800.Wm82.a6.v1	4	segmental/WGD
Glyma.01G242902.Wm82.a6.v1	4	segmental/WGD
Glyma.01G243100.Wm82.a6.v1	4	segmental/WGD
Glyma.01G243200.Wm82.a6.v1	4	segmental/WGD
Glyma.01G243300.Wm82.a6.v1	4	segmental/WGD
Glyma.01G243600.Wm82.a6.v1	4	segmental/WGD
Glyma.01G244200.Wm82.a6.v1	4	segmental/WGD
Glyma.01G244450.Wm82.a6.v1	4	segmental/WGD
Glyma.01G244500.Wm82.a6.v1	4	segmental/WGD
Glyma.01G244600.Wm82.a6.v1	4	segmental/WGD
Glyma.01G245100.Wm82.a6.v1	4	segmental/WGD
Glyma.01G245300.Wm82.a6.v1	4	segmental/WGD
Glyma.01G245500.Wm82.a6.v1	4	segmental/WGD
Glyma.01G245601.Wm82.a6.v1	4	segmental/WGD
Glyma.02G000300.Wm82.a6.v1	4	segmental/WGD
Glyma.02G000400.Wm82.a6.v1	4	segmental/WGD
Glyma.02G000500.Wm82.a6.v1	4	segmental/WGD
Glyma.02G000600.Wm82.a6.v1	4	segmental/WGD
Glyma.02G000700.Wm82.a6.v1	4	segmental/WGD
Glyma.02G000751.Wm82.a6.v1	4	segmental/WGD
Glyma.02G001000.Wm82.a6.v1	4	segmental/WGD
Glyma.02G001100.Wm82.a6.v1	4	segmental/WGD
Glyma.02G001400.Wm82.a6.v1	4	segmental/WGD
Glyma.02G001500.Wm82.a6.v1	4	segmental/WGD
Glyma.02G001600.Wm82.a6.v1	4	segmental/WGD
Glyma.02G001700.Wm82.a6.v1	4	segmental/WGD
Glyma.02G002000.Wm82.a6.v1	4	segmental/WGD
Glyma.02G002100.Wm82.a6.v1	4	segmental/WGD
Glyma.02G002300.Wm82.a6.v1	4	segmental/WGD
Glyma.02G002500.Wm82.a6.v1	4	segmental/WGD
Glyma.02G002650.Wm82.a6.v1	4	segmental/WGD
Glyma.02G002700.Wm82.a6.v1	4	segmental/WGD
Glyma.02G002800.Wm82.a6.v1	4	segmental/WGD
Glyma.02G002900.Wm82.a6.v1	4	segmental/WGD
Glyma.02G003000.Wm82.a6.v1	4	segmental/WGD
Glyma.02G003100.Wm82.a6.v1	4	segmental/WGD
Glyma.02G003200.Wm82.a6.v1	4	segmental/WGD
Glyma.02G003300.Wm82.a6.v1	4	segmental/WGD
Glyma.02G003400.Wm82.a6.v1	4	segmental/WGD
Glyma.02G003500.Wm82.a6.v1	4	segmental/WGD
Glyma.02G003600.Wm82.a6.v1	4	segmental/WGD
Glyma.02G003700.Wm82.a6.v1	4	segmental/WGD
Glyma.02G003800.Wm82.a6.v1	4	segmental/WGD
Glyma.02G003900.Wm82.a6.v1	4	segmental/WGD
Glyma.02G004000.Wm82.a6.v1	4	segmental/WGD
Glyma.02G004100.Wm82.a6.v1	4	segmental/WGD
Glyma.02G004200.Wm82.a6.v1	4	segmental/WGD
Glyma.02G004400.Wm82.a6.v1	4	segmental/WGD
Glyma.02G004600.Wm82.a6.v1	4	segmental/WGD
Glyma.02G004800.Wm82.a6.v1	4	segmental/WGD
Glyma.02G005000.Wm82.a6.v1	4	segmental/WGD
Glyma.02G005100.Wm82.a6.v1	4	segmental/WGD
Glyma.02G005200.Wm82.a6.v1	4	segmental/WGD
Glyma.02G005300.Wm82.a6.v1	4	segmental/WGD
Glyma.02G005400.Wm82.a6.v1	4	segmental/WGD
Glyma.02G005500.Wm82.a6.v1	4	segmental/WGD
Glyma.02G005600.Wm82.a6.v1	4	segmental/WGD
Glyma.02G005700.Wm82.a6.v1	4	segmental/WGD
Glyma.02G005800.Wm82.a6.v1	4	segmental/WGD
Glyma.02G006000.Wm82.a6.v1	4	segmental/WGD
Glyma.02G006100.Wm82.a6.v1	4	segmental/WGD
Glyma.02G006200.Wm82.a6.v1	4	segmental/WGD
Glyma.02G006300.Wm82.a6.v1	4	segmental/WGD
Glyma.02G006400.Wm82.a6.v1	4	segmental/WGD
Glyma.02G006500.Wm82.a6.v1	4	segmental/WGD
Glyma.02G006600.Wm82.a6.v1	4	segmental/WGD
Glyma.02G006700.Wm82.a6.v1	4	segmental/WGD
Glyma.02G006800.Wm82.a6.v1	4	segmental/WGD
Glyma.02G006900.Wm82.a6.v1	4	segmental/WGD
Glyma.02G007000.Wm82.a6.v1	4	segmental/WGD
Glyma.02G007100.Wm82.a6.v1	4	segmental/WGD
Glyma.02G007166.Wm82.a6.v1	4	segmental/WGD
Glyma.02G007300.Wm82.a6.v1	4	segmental/WGD
Glyma.02G007400.Wm82.a6.v1	4	segmental/WGD
Glyma.02G007500.Wm82.a6.v1	4	segmental/WGD
Glyma.02G007550.Wm82.a6.v1	4	segmental/WGD
Glyma.02G007600.Wm82.a6.v1	4	segmental/WGD
Glyma.02G007700.Wm82.a6.v1	4	segmental/WGD
Glyma.02G007800.Wm82.a6.v1	4	segmental/WGD
Glyma.02G008000.Wm82.a6.v1	4	segmental/WGD
Glyma.02G008100.Wm82.a6.v1	4	segmental/WGD
Glyma.02G008200.Wm82.a6.v1	4	segmental/WGD
Glyma.02G008300.Wm82.a6.v1	4	segmental/WGD
Glyma.02G008400.Wm82.a6.v1	4	segmental/WGD
Glyma.02G008500.Wm82.a6.v1	4	segmental/WGD
Glyma.02G008600.Wm82.a6.v1	4	segmental/WGD
Glyma.02G008701.Wm82.a6.v1	4	segmental/WGD
Glyma.02G008800.Wm82.a6.v1	4	segmental/WGD
Glyma.02G008900.Wm82.a6.v1	4	segmental/WGD
Glyma.02G009000.Wm82.a6.v1	4	segmental/WGD
Glyma.02G009100.Wm82.a6.v1	4	segmental/WGD
Glyma.02G009200.Wm82.a6.v1	4	segmental/WGD
Glyma.02G009300.Wm82.a6.v1	4	segmental/WGD
Glyma.02G009400.Wm82.a6.v1	4	segmental/WGD
Glyma.02G009500.Wm82.a6.v1	4	segmental/WGD
Glyma.02G009600.Wm82.a6.v1	4	segmental/WGD
Glyma.02G009700.Wm82.a6.v1	4	segmental/WGD
Glyma.02G009800.Wm82.a6.v1	4	segmental/WGD
Glyma.02G010000.Wm82.a6.v1	4	segmental/WGD
Glyma.02G010100.Wm82.a6.v1	4	segmental/WGD
Glyma.02G010200.Wm82.a6.v1	4	segmental/WGD
Glyma.02G010300.Wm82.a6.v1	4	segmental/WGD
Glyma.02G010500.Wm82.a6.v1	4	segmental/WGD
Glyma.02G010600.Wm82.a6.v1	4	segmental/WGD
Glyma.02G010700.Wm82.a6.v1	4	segmental/WGD
Glyma.02G010900.Wm82.a6.v1	4	segmental/WGD
Glyma.02G011100.Wm82.a6.v1	4	segmental/WGD
Glyma.02G011200.Wm82.a6.v1	4	segmental/WGD
Glyma.02G011300.Wm82.a6.v1	4	segmental/WGD
Glyma.02G011400.Wm82.a6.v1	4	segmental/WGD
Glyma.02G011500.Wm82.a6.v1	4	segmental/WGD
Glyma.02G011800.Wm82.a6.v1	4	segmental/WGD
Glyma.02G011900.Wm82.a6.v1	4	segmental/WGD
Glyma.02G012000.Wm82.a6.v1	4	segmental/WGD
Glyma.02G012100.Wm82.a6.v1	4	segmental/WGD
Glyma.02G012300.Wm82.a6.v1	4	segmental/WGD
Glyma.02G012400.Wm82.a6.v1	4	segmental/WGD
Glyma.02G012500.Wm82.a6.v1	4	segmental/WGD
Glyma.02G012600.Wm82.a6.v1	4	segmental/WGD
Glyma.02G012700.Wm82.a6.v1	4	segmental/WGD
Glyma.02G012800.Wm82.a6.v1	4	segmental/WGD
Glyma.02G012900.Wm82.a6.v1	4	segmental/WGD
Glyma.02G013000.Wm82.a6.v1	4	segmental/WGD
Glyma.02G013100.Wm82.a6.v1	4	segmental/WGD
Glyma.02G013200.Wm82.a6.v1	4	segmental/WGD
Glyma.02G013300.Wm82.a6.v1	4	segmental/WGD
Glyma.02G013402.Wm82.a6.v1	4	segmental/WGD
Glyma.02G013500.Wm82.a6.v1	4	segmental/WGD
Glyma.02G013600.Wm82.a6.v1	4	segmental/WGD
Glyma.02G013700.Wm82.a6.v1	4	segmental/WGD
Glyma.02G013800.Wm82.a6.v1	4	segmental/WGD
Glyma.02G013900.Wm82.a6.v1	4	segmental/WGD
Glyma.02G014000.Wm82.a6.v1	4	segmental/WGD
Glyma.02G014100.Wm82.a6.v1	4	segmental/WGD
Glyma.02G014200.Wm82.a6.v1	4	segmental/WGD
Glyma.02G014300.Wm82.a6.v1	4	segmental/WGD
Glyma.02G014400.Wm82.a6.v1	4	segmental/WGD
Glyma.02G014500.Wm82.a6.v1	4	segmental/WGD
Glyma.02G014666.Wm82.a6.v1	4	segmental/WGD
Glyma.02G014800.Wm82.a6.v1	4	segmental/WGD
Glyma.02G014900.Wm82.a6.v1	4	segmental/WGD
Glyma.02G015100.Wm82.a6.v1	4	segmental/WGD
Glyma.02G015200.Wm82.a6.v1	4	segmental/WGD
Glyma.02G015300.Wm82.a6.v1	4	segmental/WGD
Glyma.02G015500.Wm82.a6.v1	4	segmental/WGD
Glyma.02G015600.Wm82.a6.v1	4	segmental/WGD
Glyma.02G015700.Wm82.a6.v1	4	segmental/WGD
Glyma.02G015900.Wm82.a6.v1	4	segmental/WGD
Glyma.02G016100.Wm82.a6.v1	4	segmental/WGD
Glyma.02G016200.Wm82.a6.v1	4	segmental/WGD
Glyma.02G016250.Wm82.a6.v1	4	segmental/WGD
Glyma.02G016300.Wm82.a6.v1	4	segmental/WGD
Glyma.02G016400.Wm82.a6.v1	4	segmental/WGD
Glyma.02G016500.Wm82.a6.v1	4	segmental/WGD
Glyma.02G016600.Wm82.a6.v1	4	segmental/WGD
Glyma.02G016700.Wm82.a6.v1	4	segmental/WGD
Glyma.02G016800.Wm82.a6.v1	4	segmental/WGD
Glyma.02G016900.Wm82.a6.v1	4	segmental/WGD
Glyma.02G017100.Wm82.a6.v1	4	segmental/WGD
Glyma.02G017201.Wm82.a6.v1	4	segmental/WGD
Glyma.02G017400.Wm82.a6.v1	4	segmental/WGD
Glyma.02G017500.Wm82.a6.v1	4	segmental/WGD
Glyma.02G017550.Wm82.a6.v1	4	segmental/WGD
Glyma.02G017675.Wm82.a6.v1	4	segmental/WGD
Glyma.02G017800.Wm82.a6.v1	4	segmental/WGD
Glyma.02G017900.Wm82.a6.v1	4	segmental/WGD
Glyma.02G018000.Wm82.a6.v1	4	segmental/WGD
Glyma.02G018200.Wm82.a6.v1	4	segmental/WGD
Glyma.02G018300.Wm82.a6.v1	4	segmental/WGD
Glyma.02G018450.Wm82.a6.v1	4	segmental/WGD
Glyma.02G018600.Wm82.a6.v1	4	segmental/WGD
Glyma.02G018700.Wm82.a6.v1	4	segmental/WGD
Glyma.02G018900.Wm82.a6.v1	4	segmental/WGD
Glyma.02G019000.Wm82.a6.v1	4	segmental/WGD
Glyma.02G019100.Wm82.a6.v1	4	segmental/WGD
Glyma.02G019200.Wm82.a6.v1	4	segmental/WGD
Glyma.02G019300.Wm82.a6.v1	4	segmental/WGD
Glyma.02G019400.Wm82.a6.v1	4	segmental/WGD
Glyma.02G019500.Wm82.a6.v1	4	segmental/WGD
Glyma.02G019600.Wm82.a6.v1	4	segmental/WGD
Glyma.02G019700.Wm82.a6.v1	4	segmental/WGD
Glyma.02G019800.Wm82.a6.v1	4	segmental/WGD
Glyma.02G019900.Wm82.a6.v1	4	segmental/WGD
Glyma.02G020000.Wm82.a6.v1	4	segmental/WGD
Glyma.02G020100.Wm82.a6.v1	4	segmental/WGD
Glyma.02G020300.Wm82.a6.v1	4	segmental/WGD
Glyma.02G020500.Wm82.a6.v1	4	segmental/WGD
Glyma.02G020600.Wm82.a6.v1	4	segmental/WGD
Glyma.02G020800.Wm82.a6.v1	4	segmental/WGD
Glyma.02G020900.Wm82.a6.v1	4	segmental/WGD
Glyma.02G021700.Wm82.a6.v1	4	segmental/WGD
Glyma.02G021900.Wm82.a6.v1	4	segmental/WGD
Glyma.02G022000.Wm82.a6.v1	4	segmental/WGD
Glyma.02G022100.Wm82.a6.v1	4	segmental/WGD
Glyma.02G022200.Wm82.a6.v1	4	segmental/WGD
Glyma.02G022300.Wm82.a6.v1	4	segmental/WGD
Glyma.02G022351.Wm82.a6.v1	4	segmental/WGD
Glyma.02G022400.Wm82.a6.v1	4	segmental/WGD
Glyma.02G022500.Wm82.a6.v1	4	segmental/WGD
Glyma.02G022800.Wm82.a6.v1	4	segmental/WGD
Glyma.02G023000.Wm82.a6.v1	4	segmental/WGD
Glyma.02G023500.Wm82.a6.v1	4	segmental/WGD
Glyma.02G023800.Wm82.a6.v1	4	segmental/WGD
Glyma.02G024100.Wm82.a6.v1	4	segmental/WGD
Glyma.02G024200.Wm82.a6.v1	4	segmental/WGD
Glyma.02G024400.Wm82.a6.v1	4	segmental/WGD
Glyma.02G024500.Wm82.a6.v1	4	segmental/WGD
Glyma.02G024600.Wm82.a6.v1	4	segmental/WGD
Glyma.02G024900.Wm82.a6.v1	4	segmental/WGD
Glyma.02G025000.Wm82.a6.v1	4	segmental/WGD
Glyma.02G025100.Wm82.a6.v1	4	segmental/WGD
Glyma.02G025200.Wm82.a6.v1	4	segmental/WGD
Glyma.02G025300.Wm82.a6.v1	4	segmental/WGD
Glyma.02G025400.Wm82.a6.v1	4	segmental/WGD
Glyma.02G025600.Wm82.a6.v1	4	segmental/WGD
Glyma.02G025650.Wm82.a6.v1	4	segmental/WGD
Glyma.02G025700.Wm82.a6.v1	4	segmental/WGD
Glyma.02G025900.Wm82.a6.v1	4	segmental/WGD
Glyma.02G026000.Wm82.a6.v1	4	segmental/WGD
Glyma.02G026200.Wm82.a6.v1	4	segmental/WGD
Glyma.02G026300.Wm82.a6.v1	4	segmental/WGD
Glyma.02G026500.Wm82.a6.v1	4	segmental/WGD
Glyma.02G026600.Wm82.a6.v1	4	segmental/WGD
Glyma.02G026700.Wm82.a6.v1	4	segmental/WGD
Glyma.02G026751.Wm82.a6.v1	4	segmental/WGD
Glyma.02G026800.Wm82.a6.v1	4	segmental/WGD
Glyma.02G026900.Wm82.a6.v1	4	segmental/WGD
Glyma.02G027000.Wm82.a6.v1	4	segmental/WGD
Glyma.02G027100.Wm82.a6.v1	4	segmental/WGD
Glyma.02G027200.Wm82.a6.v1	4	segmental/WGD
Glyma.02G027400.Wm82.a6.v1	4	segmental/WGD
Glyma.02G027500.Wm82.a6.v1	4	segmental/WGD
Glyma.02G027600.Wm82.a6.v1	4	segmental/WGD
Glyma.02G027800.Wm82.a6.v1	4	segmental/WGD
Glyma.02G029100.Wm82.a6.v1	4	segmental/WGD
Glyma.02G029200.Wm82.a6.v1	4	segmental/WGD
Glyma.02G029300.Wm82.a6.v1	4	segmental/WGD
Glyma.02G029600.Wm82.a6.v1	4	segmental/WGD
Glyma.02G029750.Wm82.a6.v1	4	segmental/WGD
Glyma.02G029800.Wm82.a6.v1	4	segmental/WGD
Glyma.02G029900.Wm82.a6.v1	4	segmental/WGD
Glyma.02G029966.Wm82.a6.v1	4	segmental/WGD
Glyma.02G030032.Wm82.a6.v1	4	segmental/WGD
Glyma.02G030100.Wm82.a6.v1	4	segmental/WGD
Glyma.02G030200.Wm82.a6.v1	4	segmental/WGD
Glyma.02G030500.Wm82.a6.v1	4	segmental/WGD
Glyma.02G030700.Wm82.a6.v1	4	segmental/WGD
Glyma.02G030800.Wm82.a6.v1	4	segmental/WGD
Glyma.02G030900.Wm82.a6.v1	4	segmental/WGD
Glyma.02G031000.Wm82.a6.v1	4	segmental/WGD
Glyma.02G031100.Wm82.a6.v1	4	segmental/WGD
Glyma.02G032100.Wm82.a6.v1	4	segmental/WGD
Glyma.02G032200.Wm82.a6.v1	4	segmental/WGD
Glyma.02G032300.Wm82.a6.v1	4	segmental/WGD
Glyma.02G032400.Wm82.a6.v1	4	segmental/WGD
Glyma.02G032700.Wm82.a6.v1	4	segmental/WGD
Glyma.02G032800.Wm82.a6.v1	4	segmental/WGD
Glyma.02G033001.Wm82.a6.v1	4	segmental/WGD
Glyma.02G033100.Wm82.a6.v1	4	segmental/WGD
Glyma.02G033200.Wm82.a6.v1	4	segmental/WGD
Glyma.02G033300.Wm82.a6.v1	4	segmental/WGD
Glyma.02G033400.Wm82.a6.v1	4	segmental/WGD
Glyma.02G033500.Wm82.a6.v1	4	segmental/WGD
Glyma.02G033600.Wm82.a6.v1	4	segmental/WGD
Glyma.02G033700.Wm82.a6.v1	4	segmental/WGD
Glyma.02G033900.Wm82.a6.v1	4	segmental/WGD
Glyma.02G034000.Wm82.a6.v1	4	segmental/WGD
Glyma.02G034200.Wm82.a6.v1	4	segmental/WGD
Glyma.02G034300.Wm82.a6.v1	4	segmental/WGD
Glyma.02G034500.Wm82.a6.v1	4	segmental/WGD
Glyma.02G034600.Wm82.a6.v1	4	segmental/WGD
Glyma.02G034700.Wm82.a6.v1	4	segmental/WGD
Glyma.02G034800.Wm82.a6.v1	4	segmental/WGD
Glyma.02G035000.Wm82.a6.v1	4	segmental/WGD
Glyma.02G035100.Wm82.a6.v1	4	segmental/WGD
Glyma.02G035200.Wm82.a6.v1	4	segmental/WGD
Glyma.02G035300.Wm82.a6.v1	4	segmental/WGD
Glyma.02G035400.Wm82.a6.v1	4	segmental/WGD
Glyma.02G035501.Wm82.a6.v1	4	segmental/WGD
Glyma.02G035600.Wm82.a6.v1	4	segmental/WGD
Glyma.02G035700.Wm82.a6.v1	4	segmental/WGD
Glyma.02G035800.Wm82.a6.v1	4	segmental/WGD
Glyma.02G035900.Wm82.a6.v1	4	segmental/WGD
Glyma.02G036000.Wm82.a6.v1	4	segmental/WGD
Glyma.02G036100.Wm82.a6.v1	4	segmental/WGD
Glyma.02G036200.Wm82.a6.v1	4	segmental/WGD
Glyma.02G036300.Wm82.a6.v1	4	segmental/WGD
Glyma.02G036400.Wm82.a6.v1	4	segmental/WGD
Glyma.02G036500.Wm82.a6.v1	4	segmental/WGD
Glyma.02G036700.Wm82.a6.v1	4	segmental/WGD
Glyma.02G036900.Wm82.a6.v1	4	segmental/WGD
Glyma.02G037000.Wm82.a6.v1	4	segmental/WGD
Glyma.02G037100.Wm82.a6.v1	4	segmental/WGD
Glyma.02G037200.Wm82.a6.v1	4	segmental/WGD
Glyma.02G037300.Wm82.a6.v1	4	segmental/WGD
Glyma.02G037400.Wm82.a6.v1	4	segmental/WGD
Glyma.02G037500.Wm82.a6.v1	4	segmental/WGD
Glyma.02G037600.Wm82.a6.v1	4	segmental/WGD
Glyma.02G037700.Wm82.a6.v1	4	segmental/WGD
Glyma.02G037800.Wm82.a6.v1	4	segmental/WGD
Glyma.02G038000.Wm82.a6.v1	4	segmental/WGD
Glyma.02G038100.Wm82.a6.v1	4	segmental/WGD
Glyma.02G038200.Wm82.a6.v1	4	segmental/WGD
Glyma.02G038300.Wm82.a6.v1	4	segmental/WGD
Glyma.02G038400.Wm82.a6.v1	4	segmental/WGD
Glyma.02G038500.Wm82.a6.v1	4	segmental/WGD
Glyma.02G038601.Wm82.a6.v1	4	segmental/WGD
Glyma.02G038700.Wm82.a6.v1	4	segmental/WGD
Glyma.02G038800.Wm82.a6.v1	4	segmental/WGD
Glyma.02G038900.Wm82.a6.v1	4	segmental/WGD
Glyma.02G039000.Wm82.a6.v1	4	segmental/WGD
Glyma.02G039101.Wm82.a6.v1	4	segmental/WGD
Glyma.02G039201.Wm82.a6.v1	4	segmental/WGD
Glyma.02G039300.Wm82.a6.v1	4	segmental/WGD
Glyma.02G039400.Wm82.a6.v1	4	segmental/WGD
Glyma.02G039500.Wm82.a6.v1	4	segmental/WGD
Glyma.02G039700.Wm82.a6.v1	4	segmental/WGD
Glyma.02G039800.Wm82.a6.v1	4	segmental/WGD
Glyma.02G039900.Wm82.a6.v1	4	segmental/WGD
Glyma.02G040100.Wm82.a6.v1	4	segmental/WGD
Glyma.02G040200.Wm82.a6.v1	4	segmental/WGD
Glyma.02G040500.Wm82.a6.v1	4	segmental/WGD
Glyma.02G040600.Wm82.a6.v1	4	segmental/WGD
Glyma.02G040650.Wm82.a6.v1	4	segmental/WGD
Glyma.02G040700.Wm82.a6.v1	4	segmental/WGD
Glyma.02G040802.Wm82.a6.v1	4	segmental/WGD
[truncated: 46,389 more rows]

## Sheet: Table S5
tf_name	tf_family	annotation	Uniprot_ID	KEGG Pathway	StringtieNetwork Biological Gene Ontology Terms	gene_name	Genome Version	gene_id	chrom	peak_start	peak_end	peak_center	peak_score	gene_start	gene_end	gene_strand	tss	distance_to_tss
B3_Glyma.16G050300	B3	seed high expression	K7MFA4	NA	GO:0010557 Positive regulation of macromolecule biosynthetic process	GmROS2-1	Wm82.a4.v1	Glyma.10G065900.Wm82.a4.v1	Gm10	6324279	6324480	6324379	0	6324411	6341471	+	6324411	32	12
					GO:0006110 Regulation of glycolytic process
					GO:0045893 Positive regulation of transcription, DNA-templated
					GO:0009845 Seed germination
					GO:0019432 Triglyceride biosynthetic process
					GO:0009738 Abscisic acid-activated signaling pathway
					GO:0032870 Cellular response to hormone stimulus
					GO:0009414 Response to water deprivation
					GO:0009744 Response to sucrose
					GO:0009755 Hormone-mediated signaling pathway
					GO:0007275 Multicellular organism development (direct)
					GO:0009791 Post-embryonic development (direct)
					GO:0009651 Response to salt stress
					GO:1901700 Response to oxygen-containing compound
B3_Glyma.16G050300	B3	seed high expression	K7MFA4	NA	GO:0010557 Positive regulation of macromolecule biosynthetic process	GmROS2-1	Wm82.a4.v1	Glyma.10G065900.Wm82.a4.v1	Gm10	6324174	6324375	6324274	0	6324411	6341471	+	6324411	137
					GO:0006110 Regulation of glycolytic process
					GO:0045893 Positive regulation of transcription, DNA-templated
					GO:0009845 Seed germination
					GO:0019432 Triglyceride biosynthetic process
					GO:0009738 Abscisic acid-activated signaling pathway
					GO:0032870 Cellular response to hormone stimulus
					GO:0009414 Response to water deprivation
					GO:0009744 Response to sucrose
					GO:0009755 Hormone-mediated signaling pathway
					GO:0007275 Multicellular organism development (direct)
					GO:0009791 Post-embryonic development (direct)
					GO:0009651 Response to salt stress
					GO:1901700 Response to oxygen-containing compound
B3_Glyma.16G050300	B3	seed high expression	K7MFA4	NA	GO:0010557 Positive regulation of macromolecule biosynthetic process	GmROS2-1	Wm82.a4.v1	Glyma.10G065900.Wm82.a4.v1	Gm10	6324148	6324349	6324248	0	6324411	6341471	+	6324411	163
					GO:0006110 Regulation of glycolytic process
					GO:0045893 Positive regulation of transcription, DNA-templated
					GO:0009845 Seed germination
					GO:0019432 Triglyceride biosynthetic process
					GO:0009738 Abscisic acid-activated signaling pathway
					GO:0032870 Cellular response to hormone stimulus
					GO:0009414 Response to water deprivation
					GO:0009744 Response to sucrose
					GO:0009755 Hormone-mediated signaling pathway
					GO:0007275 Multicellular organism development (direct)
					GO:0009791 Post-embryonic development (direct)
					GO:0009651 Response to salt stress
					GO:1901700 Response to oxygen-containing compound
B3_Glyma.19G100900	B3	seed high expression	K7MXL6	NA	NA	GmROS2-1	Wm82.a4.v1	Glyma.10G065900.Wm82.a4.v1	Gm10	6324149	6324350	6324249	0	6324411	6341471	+	6324411	162
B3_Glyma.19G100900	B3	seed high expression	K7MXL6	NA	NA	GmROS2-1	Wm82.a4.v1	Glyma.10G065900.Wm82.a4.v1	Gm10	6324126	6324327	6324226	0	6324411	6341471	+	6324411	185
Dof_Glyma.13G177500	Dof	abiotic stress response	I1M087	NA	NA	GmROS2-1	Wm82.a4.v1	Glyma.10G065900.Wm82.a4.v1	Gm10	6323891	6324092	6323991	0	6324411	6341471	+	6324411	420
G2-like_Glyma.11G136600	G2-like	nutrient utilization	I1LJZ0	NA	GO:0048511 Rhythmic process (direct)	GmROS2-1	Wm82.a4.v1	Glyma.10G065900.Wm82.a4.v1	Gm10	6323977	6324178	6324077	0	6324411	6341471	+	6324411	334
					GO:2000028 Regulation of photoperiodism, flowering
					GO:0042752 Regulation of circadian rhythm
					GO:2000241 Regulation of reproductive process
					GO:0042753 Positive regulation of circadian rhythm
					GO:0048608 Reproductive structure development
					GO:0048586 Regulation of long-day photoperiodism, flowering
					GO:0009649 Entrainment of circadian clock
					GO:0009791 Post-embryonic development
					GO:0010114 Response to red light
					GO:0000122 Negative regulation of transcription by RNA polymerase II
					GO:0009648 Photoperiodism
					GO:0009585 Red, far-red light phototransduction
					GO:0009908 Flower development
					GO:0009736 Cytokinin-activated signaling pathway
					GO:0050789 Regulation of biological process (direct)
G2-like_Glyma.18G113400	G2-like	flower high expression	K7MRD0	NA	GO:0009736 Cytokinin-activated signaling pathway	GmROS2-1	Wm82.a4.v1	Glyma.10G065900.Wm82.a4.v1	Gm10	6324104	6324305	6324204	0	6324411	6341471	+	6324411	207
					GO:0000160 Phosphorelay signal transduction system
					GO:0006355 Regulation of transcription, DNA-templated
MYB_Glyma.11G052100	MYB	abiotic stress response	Q0PJL9	NA	GO:0015996 Chlorophyll catabolic process	GmROS2-1	Wm82.a4.v1	Glyma.10G065900.Wm82.a4.v1	Gm10	6325312	6325513	6325412	0	6324411	6341471	+	6324411	1001
					GO:0010929 Positive regulation of auxin mediated signaling pathway (direct)
					GO:0009247 Glycolipid biosynthetic process
MYB_Glyma.12G193300	MYB	flower high expression	K7LVW1	NA	GO:0009957 Epidermal cell fate specification	GmROS2-1	Wm82.a4.v1	Glyma.10G065900.Wm82.a4.v1	Gm10	6323427	6323628	6323527	0	6324411	6341471	+	6324411	884
					GO:0032880 Regulation of protein localization
					GO:0010026 Trichome differentiation
					GO:0030154 Cell differentiation (direct)
					GO:0009723 Response to ethylene
MYB_Glyma.19G062000	MYB	seed high expression	A0A0R0ESD1	NA	GO:0009646 Response to absence of light	GmROS2-1	Wm82.a4.v1	Glyma.10G065900.Wm82.a4.v1	Gm10	6324459	6324660	6324559	0	6324411	6341471	+	6324411	148
MYB_Glyma.19G062000	MYB	seed high expression	A0A0R0ESD1	NA	GO:0009646 Response to absence of light	GmROS2-1	Wm82.a4.v1	Glyma.10G065900.Wm82.a4.v1	Gm10	6324672	6324873	6324772	0	6324411	6341471	+	6324411	361
SBP_Glyma.19G146000	SBP	abiotic stress response	I1N969	NA	GO:0072423 Response to DNA damage checkpoint signaling	GmROS2-1	Wm82.a4.v1	Glyma.10G065900.Wm82.a4.v1	Gm10	6324292	6324493	6324392	0	6324411	6341471	+	6324411	19
					GO:0071596 Ubiquitin-dependent protein catabolic process via the N-end rule pathway
					GO:0000086 G2/M transition of mitotic cell cycle
					GO:0009933 Meristem structural organization
					GO:0006302 Double-strand break repair
					GO:0006261 DNA-templated DNA replication
					GO:0007049 Cell cycle
					GO:0000278 Mitotic cell cycle
					GO:0031297 Replication fork processing
					GO:0009934 Regulation of meristem structural organization
ZF-HD_Glyma.12G168700	ZF-HD	seed high expression	K7LVE2	NA	NA	GmROS2-1	Wm82.a4.v1	Glyma.10G065900.Wm82.a4.v1	Gm10	6323610	6323811	6323710	0	6324411	6341471	+	6324411	701
bHLH_Glyma.08G271900	bHLH	abiotic stress response	A0A0R0IT59	MAPK signaling pathway - plant, Plant hormone signal transduction	GO:0009611 Response to wounding	GmROS2-1	Wm82.a4.v1	Glyma.10G065900.Wm82.a4.v1	Gm10	6324177	6324378	6324277	0	6324411	6341471	+	6324411	134
					GO:0031347 Regulation of defense response
					GO:0009966 Regulation of signal transduction
					GO:0050794 Regulation of cellular process (direct)
bHLH_Glyma.08G271900	bHLH	abiotic stress response	A0A0R0IT59	MAPK signaling pathway - plant, Plant hormone signal transduction	GO:0009611 Response to wounding	GmROS2-1	Wm82.a4.v1	Glyma.10G065900.Wm82.a4.v1	Gm10	6323993	6324194	6324093	0	6324411	6341471	+	6324411	318
					GO:0031347 Regulation of defense response
					GO:0009966 Regulation of signal transduction
					GO:0050794 Regulation of cellular process (direct)
bHLH_Glyma.08G271900	bHLH	abiotic stress response	A0A0R0IT59	MAPK signaling pathway - plant, Plant hormone signal transduction	GO:0009611 Response to wounding	GmROS2-1	Wm82.a4.v1	Glyma.10G065900.Wm82.a4.v1	Gm10	6323795	6323996	6323895	0	6324411	6341471	+	6324411	516
					GO:0031347 Regulation of defense response
					GO:0009966 Regulation of signal transduction
					GO:0050794 Regulation of cellular process (direct)
bZIP_Glyma.02G176800	bZIP	abiotic stress response	A0A0R0KY15	NA	NA	GmROS2-1	Wm82.a4.v1	Glyma.10G065900.Wm82.a4.v1	Gm10	6324157	6324358	6324257	0	6324411	6341471	+	6324411	154
B3_Glyma.16G050300	B3	seed high expression	K7MFA4	NA	GO:0010557 Positive regulation of macromolecule biosynthetic process	GmROS2-2	Wm82.a4.v1	Glyma.13G151000.Wm82.a4.v1	Gm13	25581485	25581686	25581585	0	25581704	25593576	+	25581704	119	19
					GO:0006110 Regulation of glycolytic process
					GO:0045893 Positive regulation of transcription, DNA-templated
					GO:0009845 Seed germination
					GO:0019432 Triglyceride biosynthetic process
					GO:0009738 Abscisic acid-activated signaling pathway
					GO:0032870 Cellular response to hormone stimulus
					GO:0009414 Response to water deprivation
					GO:0009744 Response to sucrose
					GO:0009755 Hormone-mediated signaling pathway
					GO:0007275 Multicellular organism development (direct)
					GO:0009791 Post-embryonic development (direct)
					GO:0009651 Response to salt stress
					GO:1901700 Response to oxygen-containing compound
B3_Glyma.16G050300	B3	seed high expression	K7MFA4	NA	GO:0010557 Positive regulation of macromolecule biosynthetic process	GmROS2-2	Wm82.a4.v1	Glyma.13G151000.Wm82.a4.v1	Gm13	25582509	25582710	25582609	0	25581704	25593576	+	25581704	905
					GO:0006110 Regulation of glycolytic process
					GO:0045893 Positive regulation of transcription, DNA-templated
					GO:0009845 Seed germination
					GO:0019432 Triglyceride biosynthetic process
					GO:0009738 Abscisic acid-activated signaling pathway
					GO:0032870 Cellular response to hormone stimulus
					GO:0009414 Response to water deprivation
					GO:0009744 Response to sucrose
					GO:0009755 Hormone-mediated signaling pathway
					GO:0007275 Multicellular organism development (direct)
					GO:0009791 Post-embryonic development (direct)
					GO:0009651 Response to salt stress
					GO:1901700 Response to oxygen-containing compound
B3_Glyma.19G100900	B3	seed high expression	K7MXL6	NA	NA	GmROS2-2	Wm82.a4.v1	Glyma.13G151000.Wm82.a4.v1	Gm13	25581487	25581688	25581587	0	25581704	25593576	+	25581704	117
Dof_Glyma.13G177500	Dof	abiotic stress response	I1M087	NA	NA	GmROS2-2	Wm82.a4.v1	Glyma.13G151000.Wm82.a4.v1	Gm13	25582323	25582524	25582423	0	25581704	25593576	+	25581704	719
ERF_Glyma.02G261700	ERF	seed high expression, abiotic stress response	I1JID3	NA	GO:1900150 Regulation of defense response to fungus	GmROS2-2	Wm82.a4.v1	Glyma.13G151000.Wm82.a4.v1	Gm13	25582576	25582777	25582676	0	25581704	25593576	+	25581704	972
					GO:0006338 Chromatin remodeling
					GO:0000492 Box C/D snoRNP assembly
					GO:0009908 Flower development
					GO:0048859 Formation of anatomical boundary
					GO:2000022 Regulation of jasmonic acid mediated signaling pathway
					GO:0010104 Regulation of ethylene-activated signaling pathway
					GO:0006355 Regulation of transcription, DNA-templated (direct)
					GO:0016573 Histone acetylation
					GO:0006357 Regulation of transcription by RNA polymerase II
					GO:0040029 Regulation of gene expression, epigenetic
					GO:0007275 Multicellular organism development
					GO:0006996 Organelle organization
ERF_Glyma.04G028100	ERF	seed high expression	K7KHT1	NA	NA	GmROS2-2	Wm82.a4.v1	Glyma.13G151000.Wm82.a4.v1	Gm13	25582578	25582779	25582678	0	25581704	25593576	+	25581704	974
ERF_Glyma.11G053600	ERF	nodule high expression	A0A0R4J4G1	NA	GO:0007018 Microtubule-based movement	GmROS2-2	Wm82.a4.v1	Glyma.13G151000.Wm82.a4.v1	Gm13	25582598	25582799	25582698	0	25581704	25593576	+	25581704	994
					GO:0009742 Brassinosteroid mediated signaling pathway
					GO:0009755 Hormone-mediated signaling pathway (direct)
ERF_Glyma.15G018400	ERF	abiotic stress response	I1MCT5	NA	NA	GmROS2-2	Wm82.a4.v1	Glyma.13G151000.Wm82.a4.v1	Gm13	25582598	25582799	25582698	0	25581704	25593576	+	25581704	994
ERF_Glyma.17G254600	ERF	seed high expression	K7MNY9	NA	GO:0070816 Phosphorylation of RNA polymerase II C-terminal domain	GmROS2-2	Wm82.a4.v1	Glyma.13G151000.Wm82.a4.v1	Gm13	25582577	25582778	25582677	0	25581704	25593576	+	25581704	973
					GO:0032968 Positive regulation of transcription elongation from RNA polymerase
					GO:0045893 Positive regulation of transcription, DNA-templated (direct)
G2-like_Glyma.02G098800	G2-like	abiotic stress response	I1JDW0	NA	GO:0006809 Nitric oxide biosynthetic process	GmROS2-2	Wm82.a4.v1	Glyma.13G151000.Wm82.a4.v1	Gm13	25582122	25582323	25582222	0	25581704	25593576	+	25581704	518
					GO:0042128 Nitrate assimilation
G2-like_Glyma.10G204200	G2-like	abiotic stress response, nutrient utilization	I1LCS9	NA	NA	GmROS2-2	Wm82.a4.v1	Glyma.13G151000.Wm82.a4.v1	Gm13	25582130	25582331	25582230	0	25581704	25593576	+	25581704	526
MYB_Glyma.07G037700	MYB	seed high expression	I1KHA7	NA	NA	GmROS2-2	Wm82.a4.v1	Glyma.13G151000.Wm82.a4.v1	Gm13	25582551	25582752	25582651	0	25581704	25593576	+	25581704	947
MYB_Glyma.11G052100	MYB	abiotic stress response	Q0PJL9	NA	GO:0015996 Chlorophyll catabolic process	GmROS2-2	Wm82.a4.v1	Glyma.13G151000.Wm82.a4.v1	Gm13	25582033	25582234	25582133	0	25581704	25593576	+	25581704	429
					GO:0010929 Positive regulation of auxin mediated signaling pathway (direct)
					GO:0009247 Glycolipid biosynthetic process
MYB_Glyma.12G193300	MYB	flower high expression	K7LVW1	NA	GO:0009957 Epidermal cell fate specification	GmROS2-2	Wm82.a4.v1	Glyma.13G151000.Wm82.a4.v1	Gm13	25582065	25582266	25582165	0	25581704	25593576	+	25581704	461
					GO:0032880 Regulation of protein localization
					GO:0010026 Trichome differentiation
					GO:0030154 Cell differentiation (direct)
					GO:0009723 Response to ethylene
MYB_Glyma.12G193300	MYB	flower high expression	K7LVW1	NA	GO:0009957 Epidermal cell fate specification	GmROS2-2	Wm82.a4.v1	Glyma.13G151000.Wm82.a4.v1	Gm13	25582476	25582677	25582576	0	25581704	25593576	+	25581704	872
					GO:0032880 Regulation of protein localization
					GO:0010026 Trichome differentiation
					GO:0030154 Cell differentiation (direct)
					GO:0009723 Response to ethylene
SBP_Glyma.19G146000	SBP	abiotic stress response	I1N969	NA	GO:0072423 Response to DNA damage checkpoint signaling	GmROS2-2	Wm82.a4.v1	Glyma.13G151000.Wm82.a4.v1	Gm13	25581611	25581812	25581711	0	25581704	25593576	+	25581704	7
					GO:0071596 Ubiquitin-dependent protein catabolic process via the N-end rule pat
					GO:0000086 G2/M transition of mitotic cell cycle
					GO:0009933 Meristem structural organization
					GO:0031297 Replication fork processing
					GO:0009934 Regulation of meristem structural organization
					GO:0006302 Double-strand break repair
					GO:0006261 DNA-templated DNA replication
					GO:0007049 Cell cycle
					GO:0000278 Mitotic cell cycle
WRKY_Glyma.01G053800	WRKY	abiotic stress response	I1J5V4	NA	NA	GmROS2-2	Wm82.a4.v1	Glyma.13G151000.Wm82.a4.v1	Gm13	25582262	25582463	25582362	0	25581704	25593576	+	25581704	658
WRKY_Glyma.05G127600	WRKY	biotic stress response, abiotic stress response	I1K304	NA	NA	GmROS2-2	Wm82.a4.v1	Glyma.13G151000.Wm82.a4.v1	Gm13	25582323	25582524	25582423	0	25581704	25593576	+	25581704	719
WRKY_Glyma.08G218600	WRKY	abiotic stress response	I1KVM2	NA	NA	GmROS2-2	Wm82.a4.v1	Glyma.13G151000.Wm82.a4.v1	Gm13	25582288	25582489	25582388	0	25581704	25593576	+	25581704	684
WRKY_Glyma.14G006800	WRKY	abiotic stress response	I1M690	Plant-pathogen interaction	GO:0007010 Cytoskeleton organization	GmROS2-2	Wm82.a4.v1	Glyma.13G151000.Wm82.a4.v1	Gm13	25582289	25582490	25582389	0	25581704	25593576	+	25581704	685
bHLH_Glyma.08G271900	bHLH	abiotic stress response	A0A0R0IT59	MAPK signaling pathway - plant, Plant hormone signal transduction	GO:0009611 Response to wounding	GmROS2-2	Wm82.a4.v1	Glyma.13G151000.Wm82.a4.v1	Gm13	25581168	25581369	25581268	0	25581704	25593576	+	25581704	436
					GO:0031347 Regulation of defense response
					GO:0009966 Regulation of signal transduction
					GO:0050794 Regulation of cellular process (direct)
AP2_Glyma.03G177500	AP2	abiotic stress response	I1JPI9	NA	GO:0042752 Regulation of circadian rhythm	GmROS1	Wm82.a4.v1	Glyma.03G190800.Wm82.a4.v1	Gm03	41314083	41314284	41314183	0	41314898	41326711	+	41314898	715	11
					GO:0009768 Photosynthesis, light harvesting in photosystem I
B3_Glyma.16G050300	B3	seed high expression	K7MFA4	NA	GO:0010557 Positive regulation of macromolecule biosynthetic process	GmROS1	Wm82.a4.v1	Glyma.03G190800.Wm82.a4.v1	Gm03	41314743	41314944	41314843	0	41314898	41326711	+	41314898	55
					GO:0006110 Regulation of glycolytic process
					GO:0045893 Positive regulation of transcription, DNA-templated
					GO:0009845 Seed germination
					GO:0019432 Triglyceride biosynthetic process
					GO:0009738 Abscisic acid-activated signaling pathway
					GO:0032870 Cellular response to hormone stimulus
					GO:0009414 Response to water deprivation
					GO:0009744 Response to sucrose
					GO:0009755 Hormone-mediated signaling pathway
					GO:0007275 Multicellular organism development (direct)
					GO:0009791 Post-embryonic development (direct)
					GO:0009651 Response to salt stress
					GO:1901700 Response to oxygen-containing compound
B3_Glyma.19G100900	B3	seed high expression	K7MXL6	NA	NA	GmROS1	Wm82.a4.v1	Glyma.03G190800.Wm82.a4.v1	Gm03	41314744	41314945	41314844	0	41314898	41326711	+	41314898	54
B3_Glyma.19G100900	B3	seed high expression	K7MXL6	NA	NA	GmROS1	Wm82.a4.v1	Glyma.03G190800.Wm82.a4.v1	Gm03	41314919	41315120	41315019	0	41314898	41326711	+	41314898	121
C2H2_Glyma.14G174900	C2H2	seed high expression	I1MAV0	NA	GO:0010023 Proanthocyanidin biosynthetic process	GmROS1	Wm82.a4.v1	Glyma.03G190800.Wm82.a4.v1	Gm03	41315445	41315646	41315545	0	41314898	41326711	+	41314898	647
					GO:0009813 Flavonoid biosynthetic process (direct)
					GO:0030154 Cell differentiation
					GO:0006633 Fatty acid biosynthetic process
					GO:0009957 Epidermal cell fate specification
					GO:0006970 Response to osmotic stress
					GO:0032880 Regulation of protein localization
					GO:0032502 Developmental process (direct)
					GO:0010026 Trichome differentiation
					GO:0006355 Regulation of transcription, DNA-templated (direct)
					GO:1901576 Organic substance biosynthetic process (direct)
					GO:0050794 Regulation of cellular process (direct)
					GO:0065007 Biological regulation (direct)
Dof_Glyma.13G177500	Dof	abiotic stress response	I1M087	NA	NA	GmROS1	Wm82.a4.v1	Glyma.03G190800.Wm82.a4.v1	Gm03	41314437	41314638	41314537	0	41314898	41326711	+	41314898	361
HSF_Glyma.20G156800	HSF	seed high expression, abiotic stress response	I1NGR6	NA	GO:0034605 Cellular response to heat	GmROS1	Wm82.a4.v1	Glyma.03G190800.Wm82.a4.v1	Gm03	41314950	41315151	41315050	0	41314898	41326711	+	41314898	152
					GO:0050821 Protein stabilization
					GO:0006457 Protein folding
					GO:0070370 Cellular heat acclimation
					GO:0048316 Seed development
					GO:0065007 Biological regulation (direct)
LBD_Glyma.02G234600	LBD	abiotic stress response	I1JHK6	NA	NA	GmROS1	Wm82.a4.v1	Glyma.03G190800.Wm82.a4.v1	Gm03	41315123	41315324	41315223	0	41314898	41326711	+	41314898	325
MYB-related_Glyma.10G230700	MYB-related	seed high expression	A0A0R0I7G7	NA	NA	GmROS1	Wm82.a4.v1	Glyma.03G190800.Wm82.a4.v1	Gm03	41314111	41314312	41314211	0	41314898	41326711	+	41314898	687
SBP_Glyma.11G083900	SBP	abiotic stress response	K7LNN2	NA	NA	GmROS1	Wm82.a4.v1	Glyma.03G190800.Wm82.a4.v1	Gm03	41314620	41314821	41314720	0	41314898	41326711	+	41314898	178
SBP_Glyma.12G226000	SBP	flower high expression, abiotic stress response	I1LV25	NA	NA	GmROS1	Wm82.a4.v1	Glyma.03G190800.Wm82.a4.v1	Gm03	41314638	41314839	41314738	0	41314898	41326711	+	41314898	160
SBP_Glyma.19G146000	SBP	abiotic stress response	I1N969	NA	GO:0072423 Response to DNA damage checkpoint signaling	GmROS1	Wm82.a4.v1	Glyma.03G190800.Wm82.a4.v1	Gm03	41314623	41314824	41314723	0	41314898	41326711	+	41314898	175
					GO:0071596 Ubiquitin-dependent protein catabolic process via the N-end rule pathway
					GO:0000086 G2/M transition of mitotic cell cycle
					GO:0009933 Meristem structural organization
					GO:0006302 Double-strand break repair
					GO:0006261 DNA-templated DNA replication
					GO:0007049 Cell cycle
					GO:0000278 Mitotic cell cycle
					GO:0031297 Replication fork processing
					GO:0009934 Regulation of meristem structural organization
AP2_Glyma.03G177500	AP2	abiotic stress response	I1JPI9		GO:0042752 Regulation of circadian rhythm	GmDME1-1	Wm82.a4.v1	Glyma.20G188300.Wm82.a4.v1	Gm20	42657512	42657713	42657612	0	42644822	42657242	-	42657242	370	15
					GO:0009768 Photosynthesis, light harvesting in photosystem I
B3_Glyma.16G050300	B3	seed high expression	K7MFA4	NA	GO:0010557 Positive regulation of macromolecule biosynthetic process	GmDME1-1	Wm82.a4.v1	Glyma.20G188300.Wm82.a4.v1	Gm20	42657226	42657427	42657326	0	42644822	42657242	-	42657242	84
					GO:0006110 Regulation of glycolytic process
					GO:0045893 Positive regulation of transcription, DNA-templated
					GO:0009845 Seed germination
					GO:0019432 Triglyceride biosynthetic process
					GO:0009738 Abscisic acid-activated signaling pathway
					GO:0032870 Cellular response to hormone stimulus
					GO:0009414 Response to water deprivation
					GO:0009744 Response to sucrose
					GO:0009755 Hormone-mediated signaling pathway
					GO:0007275 Multicellular organism development (direct)
					GO:0009791 Post-embryonic development (direct)
					GO:0009651 Response to salt stress
					GO:1901700 Response to oxygen-containing compound
C2H2_Glyma.19G214600	C2H2	nutrient utilization	I1NBA6	NA	NA	GmDME1-1	Wm82.a4.v1	Glyma.20G188300.Wm82.a4.v1	Gm20	42656681	42656882	42656781	0	42644822	42657242	-	42657242	461
Dof_Glyma.02G108600	Dof	abiotic stress response	K7K7M1		NA	GmDME1-1	Wm82.a4.v1	Glyma.20G188300.Wm82.a4.v1	Gm20	42656175	42656376	42656275	0	42644822	42657242	-	42657242	967
G2-like_Glyma.02G098800	G2-like	abiotic stress response	I1JDW0	NA	GO:0006809 Nitric oxide biosynthetic process	GmDME1-1	Wm82.a4.v1	Glyma.20G188300.Wm82.a4.v1	Gm20	42656670	42656871	42656770	0	42644822	42657242	-	42657242	472
					GO:0042128 Nitrate assimilation
G2-like_Glyma.09G211400	G2-like	nodule high expression, abiotic stress response	K7LF63	NA	GO:0010965 Regulation of mitotic sister chromatid separation	GmDME1-1	Wm82.a4.v1	Glyma.20G188300.Wm82.a4.v1	Gm20	42656668	42656869	42656768	0	42644822	42657242	-	42657242	474
					GO:0033045 Regulation of sister chromatid segregation
					GO:0031145 Anaphase-promoting complex-dependent catabolic process
					GO:0007088 Regulation of mitotic nuclear division
					GO:0070979 Protein K11-linked ubiquitination
					GO:0051301 Cell division
					GO:0045842 Positive regulation of mitotic metaphase/anaphase transition
					GO:1903047 Mitotic cell cycle process
					GO:0007049 Cell cycle
					GO:0007094 Mitotic spindle assembly checkpoint signaling
					GO:0048481 Plant ovule development
					GO:0016567 Protein ubiquitination
					GO:0032875 Regulation of DNA endoreduplication
					GO:0010252 Auxin homeostasis
					GO:0009793 Embryo development ending in seed dormancy
					GO:0009553 Embryo sac development
					GO:0010087 Phloem or xylem histogenesis
					GO:0050794 Regulation of cellular process (direct)
					GO:0048856 Anatomical structure development
G2-like_Glyma.10G204200	G2-like	abiotic stress response, nutrient utilization	I1LCS9	NA	NA	GmDME1-1	Wm82.a4.v1	Glyma.20G188300.Wm82.a4.v1	Gm20	42656671	42656872	42656771	0	42644822	42657242	-	42657242	471
G2-like_Glyma.18G113400	G2-like	flower high expression	K7MRD0	NA	GO:0009736 Cytokinin-activated signaling pathway	GmDME1-1	Wm82.a4.v1	Glyma.20G188300.Wm82.a4.v1	Gm20	42656341	42656542	42656441	0	42644822	42657242	-	42657242	801
					GO:0000160 Phosphorelay signal transduction system
					GO:0006355 Regulation of transcription, DNA-templated
MYB_Glyma.12G193300	MYB	flower high expression	K7LVW1	NA	GO:0009957 Epidermal cell fate specification	GmDME1-1	Wm82.a4.v1	Glyma.20G188300.Wm82.a4.v1	Gm20	42657818	42658019	42657918	0	42644822	42657242	-	42657242	676
					GO:0032880 Regulation of protein localization
					GO:0010026 Trichome differentiation
					GO:0030154 Cell differentiation (direct)
					GO:0009723 Response to ethylene
MYB_Glyma.18G071600	MYB	flower high expression, abiotic stress response	I1N059	NA	GO:0048653 Anther development (direct)	GmDME1-1	Wm82.a4.v1	Glyma.20G188300.Wm82.a4.v1	Gm20	42657690	42657891	42657790	0	42644822	42657242	-	42657242	548
					GO:0010584 Pollen exine formation
					GO:0048869 Cellular developmental process
					GO:0080110 Sporopollenin biosynthetic process
					GO:0048608 Reproductive structure development (direct)
					GO:0045229 External encapsulating structure organization
					GO:0009791 Post-embryonic development (direct)
					GO:0007275 Multicellular organism development (direct)
					GO:0048856 Anatomical structure development (direct)
					GO:0030154 Cell differentiation
WRKY_Glyma.05G127600	WRKY	biotic stress response, abiotic stress response	I1K304	NA	NA	GmDME1-1	Wm82.a4.v1	Glyma.20G188300.Wm82.a4.v1	Gm20	42657540	42657741	42657640	0	42644822	42657242	-	42657242	398
WRKY_Glyma.14G006800	WRKY	abiotic stress response	I1M690	Plant-pathogen interaction	GO:0007010 Cytoskeleton organization	GmDME1-1	Wm82.a4.v1	Glyma.20G188300.Wm82.a4.v1	Gm20	42657539	42657740	42657639	0	42644822	42657242	-	42657242	397
WRKY_Glyma.19G094100	WRKY	abiotic stress response	A0A0R4J614	NA	NA	GmDME1-1	Wm82.a4.v1	Glyma.20G188300.Wm82.a4.v1	Gm20	42657540	42657741	42657640	0	42644822	42657242	-	42657242	398
ZF-HD_Glyma.12G168700	ZF-HD	seed high expression	K7LVE2	NA	NA	GmDME1-1	Wm82.a4.v1	Glyma.20G188300.Wm82.a4.v1	Gm20	42657916	42658117	42658016	0	42644822	42657242	-	42657242	774
bZIP_Glyma.02G176800	bZIP	abiotic stress response	A0A0R0KY15	NA	NA	GmDME1-1	Wm82.a4.v1	Glyma.20G188300.Wm82.a4.v1	Gm20	42656561	42656762	42656661	0	42644822	42657242	-	42657242	581
C2H2_Glyma.12G178900	C2H2	abiotic stress response	I1LTN7	NA	NA	GmDME1-2	Wm82.a4.v1	Glyma.10G202150.Wm82.a4.v1	Gm10	43416999	43417200	43417099	0	43417249	43429147	+	43417249	150	11
C2H2_Glyma.19G214600	C2H2	nutrient utilization	I1NBA6	NA	NA	GmDME1-2	Wm82.a4.v1	Glyma.10G202150.Wm82.a4.v1	Gm10	43417550	43417751	43417650	0	43417249	43429147	+	43417249	401
Dof_Glyma.13G177500	Dof	abiotic stress response	I1M087	NA	NA	GmDME1-2	Wm82.a4.v1	Glyma.10G202150.Wm82.a4.v1	Gm10	43416709	43416910	43416809	0	43417249	43429147	+	43417249	440
Dof_Glyma.13G177500	Dof	abiotic stress response	I1M087	NA	NA	GmDME1-2	Wm82.a4.v1	Glyma.10G202150.Wm82.a4.v1	Gm10	43418045	43418246	43418145	0	43417249	43429147	+	43417249	896
G2-like_Glyma.02G098800	G2-like	abiotic stress response	I1JDW0	NA	GO:0006809 Nitric oxide biosynthetic process	GmDME1-2	Wm82.a4.v1	Glyma.10G202150.Wm82.a4.v1	Gm10	43417561	43417762	43417661	0	43417249	43429147	+	43417249	412
					GO:0042128 Nitrate assimilation
G2-like_Glyma.09G211400	G2-like	nodule high expression, abiotic stress response	K7LF63	NA	GO:0010965 Regulation of mitotic sister chromatid separation	GmDME1-2	Wm82.a4.v1	Glyma.10G202150.Wm82.a4.v1	Gm10	43417553	43417754	43417653	0	43417249	43429147	+	43417249	404
					GO:0033045 Regulation of sister chromatid segregation
					GO:0031145 Anaphase-promoting complex-dependent catabolic process
					GO:0007088 Regulation of mitotic nuclear division
					GO:0070979 Protein K11-linked ubiquitination
					GO:0051301 Cell division
					GO:0045842 Positive regulation of mitotic metaphase/anaphase transition
					GO:1903047 Mitotic cell cycle process
					GO:0007049 Cell cycle
					GO:0007094 Mitotic spindle assembly checkpoint signaling
					GO:0048481 Plant ovule development
					GO:0016567 Protein ubiquitination
					GO:0032875 Regulation of DNA endoreduplication
					GO:0010252 Auxin homeostasis
					GO:0009793 Embryo development ending in seed dormancy
					GO:0009553 Embryo sac development
					GO:0010087 Phloem or xylem histogenesis
					GO:0050794 Regulation of cellular process (direct)
					GO:0048856 Anatomical structure development
G2-like_Glyma.10G204200	G2-like	abiotic stress response, nutrient utilization	I1LCS9	NA	NA	GmDME1-2	Wm82.a4.v1	Glyma.10G202150.Wm82.a4.v1	Gm10	43417560	43417761	43417660	0	43417249	43429147	+	43417249	411
LBD_Glyma.02G234600	LBD	abiotic stress response	I1JHK6	NA	NA	GmDME1-2	Wm82.a4.v1	Glyma.10G202150.Wm82.a4.v1	Gm10	43416592	43416793	43416692	0	43417249	43429147	+	43417249	557
WRKY_Glyma.05G127600	WRKY	biotic stress response, abiotic stress response	I1K304	NA	NA	GmDME1-2	Wm82.a4.v1	Glyma.10G202150.Wm82.a4.v1	Gm10	43416615	43416816	43416715	0	43417249	43429147	+	43417249	534
WRKY_Glyma.08G218600	WRKY	abiotic stress response	I1KVM2	NA	NA	GmDME1-2	Wm82.a4.v1	Glyma.10G202150.Wm82.a4.v1	Gm10	43417620	43417821	43417720	0	43417249	43429147	+	43417249	471
ZF-HD_Glyma.12G168700	ZF-HD	seed high expression	K7LVE2	NA	NA	GmDME1-2	Wm82.a4.v1	Glyma.10G202150.Wm82.a4.v1	Gm10	43416716	43416917	43416816	0	43417249	43429147	+	43417249	433
bHLH_Glyma.08G271900	bHLH	abiotic stress response	A0A0R0IT59	MAPK signaling pathway - plant, Plant hormone signal transduction	GO:0009611 Response to wounding	GmDME1-2	Wm82.a4.v1	Glyma.10G202150.Wm82.a4.v1	Gm10	43416726	43416927	43416826	0	43417249	43429147	+	43417249	423
					GO:0031347 Regulation of defense response
					GO:0009966 Regulation of signal transduction
					GO:0050794 Regulation of cellular process (direct)

## Sheet: Table S6
Sample	BioSample	Plant	Susceptibility	Tissue	Study	Variety	mock/inoculated	Time duration	WRKY_Glyma.01G053800	G2-like_Glyma.02G098800	Dof_Glyma.02G108600	bZIP_Glyma.02G176800	LBD_Glyma.02G234600	ERF_Glyma.02G261700	AP2_Glyma.03G177500	ERF_Glyma.04G028100	WRKY_Glyma.05G127600	MYB_Glyma.07G037700	WRKY_Glyma.08G218600	bHLH_Glyma.08G271900	G2-like_Glyma.09G211400	G2-like_Glyma.10G204200	MYB-related_Glyma.10G230700	MYB_Glyma.11G052100	ERF_Glyma.11G053600	SBP_Glyma.11G083900	G2-like_Glyma.11G136600	ZF-HD_Glyma.12G168700	C2H2_Glyma.12G178900	MYB_Glyma.12G193300	SBP_Glyma.12G226000	Dof_Glyma.13G177500	WRKY_Glyma.14G006800	C2H2_Glyma.14G174900	ERF_Glyma.15G018400	B3_Glyma.16G050300	ERF_Glyma.17G254600	MYB_Glyma.18G071600	G2-like_Glyma.18G113400	MYB_Glyma.19G062000	WRKY_Glyma.19G094100	B3_Glyma.19G100900	SBP_Glyma.19G146000	C2H2_Glyma.19G214600	HSF_Glyma.20G156800
fusarium_SRR9665527	SAMN12099652	Soybean	Susceptible	roots	fusarium	Sloan	Inoculated	4 DPI	11.0963	7.52456	6.33362	7.06015	5.67438	7.21171	9.57386	1.62857	8.31858	5.46588	11.3859	10.0674	10.4789	8.98932	6.6692	11.2645	10.0681	1.62857	10.1787	1.62857	9.02045	1.62857	3.49235	10.409	10.7846	1.62857	5.84323	1.62857	1.62857	7.41727	1.93494	1.62857	10.3366	1.62857	8.22242	1.62857	6.96582
fusarium_SRR9665535	SAMN12099651	Soybean	Susceptible	roots	fusarium	Sloan	Inoculated	2 DPI	11.2042	6.34586	2.15153	7.71183	8.44958	8.32219	10.3231	1.78787	6.9096	5.96961	10.6197	10.8486	9.59931	10.3397	8.32219	11.3912	10.1384	1.78787	10.1113	1.78787	8.74453	1.78787	1.78787	10.2768	10.806	1.78787	6.79303	1.78787	1.78787	7.40272	1.78787	1.78787	7.97073	1.78787	7.52957	1.78787	6.95552
fusarium_SRR9665536	SAMN12099650	Soybean	Susceptible	roots	fusarium	Sloan	Inoculated	0 DPI	10.8193	7.99999	1.7437	6.96025	6.98448	8.57151	9.14475	1.7437	8.96158	1.7437	12.2283	10.8265	9.79673	9.73141	7.77305	11.5772	9.42997	1.7437	10.3713	1.7437	7.39331	1.7437	1.7437	10.8482	10.255	1.7437	3.80096	1.7437	1.7437	8.25367	5.27407	1.7437	5.98489	1.7437	9.30886	1.7437	7.48108
fusarium_SRR9665545	SAMN12099671	Soybean	Susceptible	roots	fusarium	Sloan	mock	7 DPI	10.4972	7.45831	7.08945	7.21642	7.10047	7.50051	8.80511	2.63985	7.63541	6.02618	10.2648	9.53875	10.1673	8.48609	6.74079	11.4605	10.0585	1.92922	9.86049	1.92922	7.36087	1.92922	2.87919	9.9439	9.99792	1.92922	6.1796	1.92922	1.92922	6.42733	1.92922	1.92922	8.17822	1.92922	7.20626	1.92922	7.94142
fusarium_SRR9665546	SAMN12099670	Soybean	Susceptible	roots	fusarium	Sloan	mock	4 DPI	10.6958	7.89248	6.96119	7.50471	6.56368	6.60874	10.0575	5.06742	6.40242	4.93174	10.3768	9.54037	9.64137	9.3655	7.30932	11.4266	10.1327	1.90742	9.81318	1.90742	8.40352	1.90742	1.90742	9.85116	10.2356	1.90742	7.84307	1.90742	1.90742	6.63802	5.26842	1.90742	7.44799	1.90742	7.25368	1.90742	6.56368
fusarium_SRR9665547	SAMN12099669	Soybean	Susceptible	roots	fusarium	Sloan	mock	2 DPI	10.7987	7.79677	7.63682	6.92749	6.31143	6.36349	9.1084	2.11315	6.74334	2.11315	10.057	9.75251	8.9726	8.88185	5.26841	11.2038	9.22549	2.11315	8.8639	2.11315	7.35776	2.11315	2.11315	10.2967	10.5948	2.11315	6.59883	2.11315	2.11315	7.05956	5.77109	2.11315	7.82488	2.11315	7.85245	2.11315	5.47209
fusarium_SRR9665548	SAMN12099668	Soybean	Susceptible	roots	fusarium	Sloan	mock	0 DPI	10.8255	7.04006	3.36593	4.72818	6.73604	8.37773	8.64609	1.90742	8.12214	1.90742	10.94	10.3193	8.68867	8.87843	6.45272	11.7384	9.9198	3.74233	10.5504	1.90742	7.42299	1.90742	4.55391	10.1301	10.2368	1.90742	7.58955	3.04071	1.90742	7.88029	4.78185	1.90742	7.87415	1.90742	8.83801	3.04071	6.50132
fusarium_SRR9665549	SAMN12099667	Soybean	Susceptible	roots	fusarium	Sloan	Inoculated	14 DPI	10.5292	9.00024	6.21541	7.95827	7.05369	7.33004	7.737	2.01141	9.99168	3.57136	12.2733	9.67835	8.78582	8.27459	5.28188	10.0821	9.66107	2.01141	8.56672	2.01141	4.52326	2.01141	2.01141	8.2689	9.97779	2.01141	5.8385	2.01141	2.76619	6.69463	6.94365	2.01141	12.6768	2.01141	4.7373	2.01141	7.89316
fusarium_SRR9665550	SAMN12099666	Soybean	Susceptible	roots	fusarium	Sloan	Inoculated	10 DPI	10.4482	7.22648	5.16556	7.48194	7.35003	6.74623	8.37339	1.9637	8.75871	5.16556	12.3279	9.70911	9.66618	8.74752	6.35199	10.393	10.0875	1.9637	9.85702	1.9637	6.68496	1.9637	5.11988	8.72488	9.99117	1.9637	5.02391	1.9637	1.9637	7.33016	4.07221	1.9637	12.4038	1.9637	6.27089	1.9637	8.32402
fusarium_SRR9665551	SAMN12099665	Soybean	Susceptible	roots	fusarium	Sloan	Inoculated	7 DPI	10.9549	7.47567	7.41342	7.71125	6.82452	6.78572	8.9298	2.13119	9.17838	2.60774	11.6376	9.262	9.06956	8.92534	6.09217	11.1856	9.64723	2.13119	9.36755	2.13119	6.72549	2.13119	2.13119	9.67933	10.1125	2.13119	6.24305	2.13119	2.13119	7.52361	7.19396	2.13119	11.7369	2.13119	6.61916	2.13119	6.97004
fusarium_SRR9665552	SAMN12099664	Soybean	Susceptible	roots	fusarium	Sloan	Inoculated	4 DPI	11.0157	6.58801	6.58801	7.86196	7.40915	7.14656	9.35581	1.64733	7.74748	5.01629	11.4122	10.149	9.94908	9.54226	6.49347	11.819	9.96678	1.64733	10.2543	1.64733	7.91927	1.64733	3.13756	9.36797	10.255	1.64733	5.67963	1.9606	1.64733	6.46657	4.80276	1.64733	10.5701	1.64733	6.80394	2.38294	6.90755
fusarium_SRR9665554	SAMN12099673	Soybean	Susceptible	roots	fusarium	Sloan	mock	14 DPI	9.5576	8.08241	6.35951	6.5986	6.91667	7.40734	8.77965	1.97419	7.18841	5.19145	10.3567	9.83789	8.83462	7.74244	6.996	11.5971	10.9424	1.97419	9.14124	1.97419	7.00881	1.97419	3.34087	9.25309	9.20104	2.95543	7.63916	1.97419	1.97419	4.94647	2.401	1.97419	7.90882	1.97419	7.35815	2.401	6.97004
fusarium_SRR9665555	SAMN12099672	Soybean	Susceptible	roots	fusarium	Sloan	mock	10 DPI	10.4601	8.05862	6.94956	7.58204	6.82782	7.63381	9.13346	1.90742	7.3629	5.92064	11.0611	9.85273	10.0246	8.25086	7.30932	11.7024	10.2827	1.90742	9.54424	1.90742	7.64827	1.90742	3.2132	9.8836	10.1955	1.90742	6.14124	1.90742	1.90742	6.09974	3.74233	1.90742	8.80614	1.90742	7.64106	3.84804	7.04006
fusarium_SRR9665556	SAMN12099654	Soybean	Susceptible	roots	fusarium	Sloan	Inoculated	10 DPI	10.3602	7.92246	6.11739	8.18676	7.18039	5.36977	7.52413	2.01141	8.91898	5.41178	11.7924	9.29724	9.16252	8.29714	5.8385	10.6491	9.40755	2.01141	9.83486	2.01141	5.70982	2.01141	2.01141	8.97947	9.55281	2.01141	2.01141	2.01141	2.01141	5.41178	5.89877	2.01141	11.8994	2.01141	6.09181	2.01141	7.68665
fusarium_SRR9665565	SAMN12099679	Soybean	Susceptible	roots	fusarium	Sloan	mock	14 DPI	10.4332	8.75362	6.80219	7.51263	7.10439	7.58204	8.70259	1.90742	8.1478	4.8835	11.6482	10.2344	9.2565	8.02024	7.37164	11.6972	10.6835	1.90742	9.75926	1.90742	6.38525	1.90742	2.3121	9.82595	10.0817	1.90742	7.10439	1.90742	1.90742	5.37677	4.55391	1.90742	9.98815	1.90742	7.18593	1.90742	6.80219
fusarium_SRR9665567	SAMN12099680	Soybean	Susceptible	roots	fusarium	Sloan	mock	0 DPI	10.8289	6.54089	3.98972	1.97192	4.70963	7.86115	8.67697	1.97192	6.55835	2.70571	10.3741	10.3201	8.23666	9.10276	5.99172	11.157	9.70624	1.97192	10.1246	1.97192	7.97599	1.97192	1.97192	10.0995	10.0755	1.97192	7.14821	1.97192	1.97192	7.39159	4.27222	1.97192	5.67685	1.97192	8.19821	2.95159	6.50533
fusarium_SRR9665568	SAMN12099684	Soybean	Susceptible	roots	fusarium	Sloan	mock	10 DPI	10.5397	7.35622	5.02341	7.7326	7.67988	4.54394	8.90158	2.14021	6.9561	6.17508	10.6202	9.68231	10.1804	8.25637	6.3473	11.8686	10.9186	2.14021	9.76308	2.14021	7.45991	2.14021	2.14021	9.81043	9.95053	2.14021	6.50112	2.14021	2.14021	5.38206	2.14021	2.14021	8.09664	2.14021	6.4766	2.14021	7.09143
fusarium_SRR9665570	SAMN12099660	Soybean	Susceptible	roots	fusarium	Sloan	Inoculated	10 DPI	10.747	8.68316	5.38476	8.38622	7.44301	6.30297	8.12348	1.95261	9.21831	6.01673	12.3231	9.52678	9.06493	9.39723	6.91262	10.7948	9.94485	1.95261	9.50309	1.95261	6.73164	1.95261	5.138	9.3229	10.1432	1.95261	5.34646	1.95261	1.95261	8.25825	6.1995	1.95261	12.4822	1.95261	5.96717	1.95261	8.16799
fusarium_SRR9665571	SAMN12099681	Soybean	Susceptible	roots	fusarium	Sloan	mock	2 DPI	10.5668	7.30104	6.86636	7.66645	5.61511	6.75228	9.29405	2.38262	6.30324	4.40675	9.63709	9.60253	9.36611	8.91447	7.33115	11.7422	9.15509	2.38262	9.49582	1.96036	8.08689	1.96036	1.96036	9.95328	10.255	1.96036	4.06482	1.96036	1.96036	8.19999	1.96036	1.96036	6.70706	1.96036	7.71293	1.96036	5.20151
fusarium_SRR9665574	SAMN12099676	Soybean	Susceptible	roots	fusarium	Sloan	mock	4 DPI	10.4926	6.35401	7.44869	7.14665	7.31112	7.49829	9.20505	2.01262	6.17027	2.01262	10.2051	9.14404	10.0853	8.63341	7.58349	11.3912	9.89655	2.01262	9.28354	2.01262	7.28874	2.01262	2.01262	9.82643	10.0408	2.01262	5.41471	2.01262	2.01262	6.41729	4.60098	2.01262	5.74607	2.01262	7.32218	2.01262	6.21844
fusarium_SRR9665575	SAMN12099677	Soybean	Susceptible	roots	fusarium	Sloan	mock	7 DPI	10.8512	7.40847	6.81663	8.13494	6.53869	7.00354	10.0249	1.92692	6.42109	5.97302	10.8633	9.91895	10.2059	8.89943	7.66641	11.5472	10.3792	1.92692	10.43	1.92692	7.48579	1.92692	1.92692	10.0364	10.4136	1.92692	4.6624	1.92692	1.92692	4.53812	1.92692	1.92692	8.43702	1.92692	7.78672	1.92692	5.56097
fusarium_SRR9665576	SAMN12099674	Soybean	Susceptible	roots	fusarium	Sloan	mock	0 DPI	10.7745	7.84658	4.53812	6.34931	6.60182	7.62143	8.86125	1.92692	6.95602	4.0828	10.5991	10.0076	9.63013	9.41418	6.17342	11.3482	9.70569	4.40195	10.2934	1.92692	8.18216	1.92692	1.92692	10.0924	10.2693	1.92692	6.86889	1.92692	1.92692	8.57316	4.60162	1.92692	7.46896	1.92692	8.26248	1.92692	7.16898
fusarium_SRR9665577	SAMN12099675	Soybean	Susceptible	roots	fusarium	Sloan	mock	2 DPI	10.6033	5.40434	6.81948	7.46309	6.48257	6.14161	9.58472	1.99165	5.62694	4.81779	9.49118	9.35275	9.9752	8.83381	5.75825	10.8972	8.88852	1.99165	8.79232	1.99165	7.45345	1.99165	1.99165	9.93071	10.2616	1.99165	4.03221	1.99165	1.99165	6.34321	5.93517	1.99165	6.74235	1.99165	7.24558	4.55316	6.64398
fusarium_SRR9665579	SAMN12099655	Soybean	Susceptible	roots	fusarium	Sloan	Inoculated	14 DPI	10.7225	8.44137	6.66671	7.77883	7.48873	7.09387	8.89367	1.90742	9.38073	4.8835	12.091	10.172	9.12056	8.0423	6.29622	10.9891	10.198	1.90742	9.38073	1.90742	5.89661	1.90742	1.90742	8.8967	10.1869	1.90742	6.20133	1.90742	2.3121	6.18157	5.96755	1.90742	12.3741	1.90742	7.28177	1.90742	7.88029
fusarium_SRR9665580	SAMN12099656	Soybean	Susceptible	roots	fusarium	Sloan	Inoculated	0 DPI	11.3885	7.50501	4.26554	7.22103	6.88919	8.3342	8.75125	1.57139	7.4577	1.57139	11.2663	10.9864	9.18576	9.42402	7.46139	11.6391	10.3982	1.57139	9.71996	1.57139	8.34024	1.57139	2.75422	9.65207	10.2964	1.57139	7.93254	1.57139	1.57139	7.95368	4.04445	1.57139	7.14954	1.57139	8.0768	4.00398	7.16775
fusarium_SRR9665581	SAMN12099657	Soybean	Susceptible	roots	fusarium	Sloan	Inoculated	2 DPI	11.06	7.05821	6.00395	6.537	6.82103	7.90774	9.43128	1.71169	7.9653	5.03783	10.5378	10.7633	9.33849	9.23309	6.73537	11.8892	10.0681	1.71169	10.4295	1.71169	8.54078	1.71169	1.71169	10.2878	10.439	1.71169	7.39068	1.71169	1.71169	7.30409	5.34655	1.71169	7.61346	1.71169	8.19116	4.15208	6.88607
fusarium_SRR9665582	SAMN12099658	Soybean	Susceptible	roots	fusarium	Sloan	Inoculated	4 DPI	11.0981	7.47518	6.1877	7.88462	7.08216	6.75183	9.48303	1.54721	7.04133	6.12825	11.2628	9.86604	9.73279	9.35192	6.84441	11.3872	9.46342	1.54721	9.77144	1.54721	7.98611	1.54721	4.00227	9.81043	10.4713	1.54721	6.315	1.54721	1.54721	7.05507	5.2946	1.54721	10.1867	1.54721	6.77415	4.58945	6.10201
fusarium_SRR9665583	SAMN12099659	Soybean	Susceptible	roots	fusarium	Sloan	Inoculated	7 DPI	10.9627	8.44803	6.91068	6.99	3.33657	6.06686	9.00432	1.97192	9.32294	3.88138	11.6763	9.07877	9.8932	9.07271	5.57751	10.4368	9.33058	1.97192	9.84068	1.97192	7.47666	1.97192	1.97192	9.7121	10.4214	1.97192	4.5782	1.97192	1.97192	6.52322	6.50533	1.97192	11.7887	1.97192	4.82997	1.97192	7.66566
fusarium_SRR9665585	SAMN12099661	Soybean	Susceptible	roots	fusarium	Sloan	Inoculated	14 DPI	10.94	8.83486	6.51717	7.97508	7.22503	7.52835	7.91059	1.90742	9.94343	4.28243	12.8306	10.3159	8.35588	8.79319	6.31447	10.8326	9.94636	1.90742	9.64858	1.90742	5.23041	1.90742	1.90742	8.78012	10.3735	1.90742	5.66004	1.90742	2.3121	6.40242	5.54097	1.90742	12.9151	1.90742	6.53284	2.3121	7.90458
fusarium_SRR9665586	SAMN12099662	Soybean	Susceptible	roots	fusarium	Sloan	Inoculated	0 DPI	11.4594	8.44096	2.26847	5.72449	7.50376	8.39622	8.89133	1.69404	8.01272	1.69404	13.1716	11.4703	8.90266	9.039	5.35746	11.1689	10.7829	1.69404	10.5281	1.69404	9.00084	1.69404	1.69404	9.8972	10.255	1.69404	6.73582	1.69404	1.69404	7.76616	6.76095	1.69404	8.55069	1.69404	7.71565	6.12393	7.2375
fusarium_SRR9665587	SAMN12099663	Soybean	Susceptible	roots	fusarium	Sloan	Inoculated	2 DPI	10.912	6.15365	6.03687	7.65481	7.58263	6.62737	9.87701	2.90536	6.23835	4.37013	10.1658	10.6662	9.88829	9.51199	7.52119	11.6671	10.0921	1.68783	10.1735	1.68783	8.28332	1.68783	1.68783	9.81043	10.4264	1.68783	6.03687	1.68783	1.68783	6.95501	1.68783	1.68783	7.87099	1.68783	6.23835	4.74752	5.84949
fusarium_SRR9665588	SAMN12099678	Soybean	Susceptible	roots	fusarium	Sloan	mock	10 DPI	10.1486	7.96527	5.5746	7.79406	7.21726	6.41499	9.07477	1.94456	6.71007	5.47329	11.2607	9.75496	10.005	8.95794	7.36578	11.3912	10.2578	1.94456	9.54044	1.94456	6.99196	1.94456	1.94456	10.2804	9.80612	1.94456	7.08634	1.94456	1.94456	6.94234	1.94456	1.94456	8.83421	1.94456	6.69517	4.12283	6.69517
fusarium_SRR9665589	SAMN12099685	Soybean	Susceptible	roots	fusarium	Sloan	mock	14 DPI	10.4419	8.59271	7.89777	7.45194	7.40847	7.65157	9.0848	1.92692	7.60612	4.72071	10.98	10.345	9.2317	8.08059	7.46048	11.9768	11.5086	1.92692	9.24411	1.92692	6.96805	1.92692	2.33812	10.0661	9.93895	1.92692	7.27928	1.92692	2.33812	4.72071	3.54359	1.92692	8.66837	1.92692	7.60612	1.92692	6.94389
fusarium_SRR9665590	SAMN12099682	Soybean	Susceptible	roots	fusarium	Sloan	mock	4 DPI	10.4415	7.29101	5.89661	6.99552	6.91411	6.25901	9.35452	1.90742	5.68833	4.67242	10.2792	9.78729	9.72046	9.03788	6.86543	11.4917	9.42338	1.90742	9.84176	1.90742	8.23658	1.90742	3.50318	9.92574	10.0205	1.90742	5.0236	3.62793	1.90742	7.3629	4.49074	1.90742	8.00347	1.90742	6.88998	3.04071	6.66671
fusarium_SRR9665591	SAMN12099683	Soybean	Susceptible	roots	fusarium	Sloan	mock	7 DPI	10.7176	7.2227	7.10031	7.8026	7.44852	6.31294	9.58657	1.91353	6.56519	6.36705	10.2685	9.45335	10.132	8.19031	7.01254	11.5291	10.0681	1.91353	10.0668	1.91353	7.42321	1.91353	4.94729	9.59036	10.4243	1.91353	6.07359	1.91353	1.91353	6.91908	1.91353	1.91353	8.09738	1.91353	6.23749	1.91353	6.80614
fusarium_SRR9665596	SAMN12099653	Soybean	Susceptible	roots	fusarium	Sloan	Inoculated	7 DPI	10.7809	7.46561	6.62503	7.56186	5.74309	2.76619	9.10618	2.01141	7.90054	5.0353	11.2344	9.20487	9.88781	8.34661	5.60516	11.1695	10.1014	2.01141	10.3413	2.01141	5.41178	2.01141	2.01141	9.09335	9.85399	2.01141	6.60709	2.01141	2.01141	3.41081	2.01141	2.01141	10.4709	2.01141	5.60516	2.01141	5.80739
scn_SRR8937687	SAMN11476347	Soybean	Susceptible	roots	scn	TN09-16N	mock	5 DPI	9.81151	7.57043	6.68645	7.57043	7.06771	5.9345	8.55103	3.66358	6.20508	3.66358	10.4051	9.76775	8.63213	7.94809	6.14221	11.5071	8.8415	3.66358	9.09136	3.66358	7.61679	3.66358	4.24363	8.11873	8.99246	3.66358	4.58389	4.01087	4.24363	6.28476	4.01087	3.66358	8.50665	3.66358	5.31444	4.8415	6.82518
scn_SRR8937688	SAMN11476346	Soybean	Susceptible	roots	scn	TN09-16N	mock	5 DPI	9.63614	7.54346	7.56004	7.00301	6.97849	5.57235	8.12521	4.26479	7.02713	4.0277	10.3482	9.77902	7.73081	8.23756	5.70134	11.1058	8.47867	4.0277	8.97466	4.0277	7.81606	3.67356	4.0277	8.37021	8.83206	3.67356	4.61094	4.0277	3.67356	5.67023	4.61094	4.0277	8.3981	3.67356	4.74922	4.26479	6.48
scn_SRR8937689	SAMN11476345	Soybean	Susceptible	roots	scn	TN09-16N	mock	5 DPI	9.62297	7.72119	7.19682	7.05845	7.29863	5.57175	8.45172	3.62939	6.29513	3.62939	10.719	9.60327	8.31304	8.28031	6.29513	10.9887	8.23407	3.62939	9.06469	3.62939	7.94138	3.62939	4.49054	8.21255	9.02329	3.62939	4.34397	3.62939	3.62939	5.62668	4.34397	3.62939	8.43324	3.62939	5.57175	4.61892	6.61962
scn_SRR8937690	SAMN11476344	Soybean	Susceptible	roots	scn	TN09-16N	Inoculated	5 DPI	9.79552	7.36507	5.6931	7.51606	6.7839	5.49509	8.61623	3.67157	6.86588	3.67157	10.1199	10.282	8.87756	7.72005	6.7265	10.8765	9.2429	3.67157	9.492	3.67157	7.04062	4.02435	4.26058	8.88734	9.13201	3.67157	5.63028	4.02435	3.67157	5.49509	3.67157	3.67157	8.04589	4.26058	6.36105	4.35864	6.24244
scn_SRR8937691	SAMN11476343	Soybean	Susceptible	roots	scn	TN09-16N	Inoculated	5 DPI	9.57631	6.82575	5.73042	7.07894	6.85997	5.80412	7.66564	3.73296	7.10765	4.1274	9.96408	9.95231	8.46506	8.19206	6.4739	10.8937	8.53518	3.73296	9.52953	3.73296	7.04964	3.73296	3.73296	8.37968	9.02195	3.73296	4.76977	3.73296	3.73296	5.4817	4.59637	3.73296	8.00697	3.73296	5.87405	4.38977	6.7907
scn_SRR8937692	SAMN11476342	Soybean	Susceptible	roots	scn	TN09-16N	Inoculated	5 DPI	9.56141	6.70559	6.2835	7.29509	6.88881	5.22684	8.84755	3.9721	7.56196	3.9721	10.2075	10.281	8.79985	7.90448	6.7568	10.8568	8.8534	3.6406	9.86639	3.6406	7.69851	3.6406	3.6406	8.4285	9.09239	3.6406	4.65222	3.6406	3.9721	5.4384	4.76933	3.6406	7.89882	3.6406	5.4384	4.76933	6.48
scn_SRR8937693	SAMN11476341	Soybean	Resistant	roots	scn	TN09-29N	mock	5 DPI	9.77929	7.31975	5.76861	7.52993	6.70521	5.69638	8.33475	3.62201	6.66874	3.62201	10.2536	9.74058	7.98789	8.02181	6.1546	11.0768	9.15761	3.94065	9.80314	3.62201	7.78273	3.62201	4.47023	8.77034	9.2005	3.62201	5.22732	3.62201	3.62201	5.53924	4.3257	3.62201	7.615	3.62201	5.59368	3.94065	6.00496
scn_SRR8937694	SAMN11476340	Soybean	Resistant	roots	scn	TN09-29N	mock	5 DPI	9.82914	7.31241	5.66643	7.00804	6.64523	5.51052	8.01968	3.61554	6.93061	3.61554	10.4647	9.91789	8.25138	8.05645	6.25592	11.0112	8.75749	3.61554	9.98015	3.61554	7.72063	3.61554	3.92968	8.55089	9.22909	3.61554	4.97223	3.61554	3.92968	5.61644	4.30964	3.61554	8.14446	3.61554	5.20132	4.45238	6.51816
scn_SRR8937695	SAMN11476395	Soybean	Resistant	roots	scn	TN09-29N	mock	5 DPI	9.63875	7.36158	5.89411	7.409	6.14257	5.55619	8.42352	4.0354	6.81665	4.0354	10.1398	9.97671	7.88167	8.11654	6.63628	10.9787	9.13037	3.67814	9.75859	3.67814	7.78447	3.67814	4.8868	8.44638	9.06396	3.67814	5.36917	3.67814	3.67814	5.52083	4.27447	3.67814	8.2263	3.67814	5.78069	4.0354	6.35339
scn_SRR8937696	SAMN11476394	Soybean	Resistant	roots	scn	TN09-29N	Inoculated	5 DPI	9.93426	6.14638	5.25351	7.22521	6.52721	5.16591	8.30762	3.66917	7.30475	4.0203	9.22143	9.94821	8.65653	7.9731	6.25169	10.8225	9.0961	3.66917	9.74472	3.66917	8.13385	3.66917	4.25549	8.79343	9.23161	3.66917	4.85894	3.66917	4.25549	5.80037	4.59906	3.66917	7.30475	3.66917	6.42337	4.25549	6.52721
scn_SRR8937697	SAMN11476393	Soybean	Resistant	roots	scn	TN09-29N	Inoculated	5 DPI	9.43316	7.46989	5.63372	6.78947	6.46443	5.89249	7.36283	4.48176	6.65916	3.77718	9.78038	10.1083	7.5815	7.61685	6.1434	11.0316	8.69566	3.77718	9.66713	3.77718	7.41736	3.77718	4.48176	8.545	8.63956	3.77718	5.89249	3.77718	4.48176	5.81156	3.77718	3.77718	7.40392	3.77718	5.31309	4.88564	6.35598
scn_SRR8937698	SAMN11476392	Soybean	Resistant	roots	scn	TN09-29N	Inoculated	5 DPI	9.7052	7.0535	5.0737	7.26919	6.36553	5.6579	8.23775	3.56902	7.24394	3.8507	10.2979	9.8889	8.14215	7.86073	5.77115	10.7489	8.79862	3.56902	9.76612	3.56902	7.65142	3.56902	4.0412	8.45356	8.97342	3.8507	5.13381	4.32293	3.56902	5.29875	4.87354	3.56902	8.36291	3.8507	5.73444	4.53924	6.79937
Dorrance_SRR18185499	SAMN26344678	Soybean	NA	roots	p_sojae	NIL-4060R	Inoculated	NA	8.3034	6.04109	4.73252	5.33609	5.92	3.78355	7.10764	1.87252	5.94505	2.29904	10.209	8.82543	7.60831	5.70223	3.78355	9.07256	7.78503	1.87252	5.64222	1.87252	4.84356	1.87252	2.85315	6.65573	7.66965	1.87252	4.17457	1.87252	1.87252	5.67253	2.60706	1.87252	9.18186	1.87252	4.73252	2.29904	5.67253
Dorrance_SRR18185500	SAMN26344677	Soybean	NA	roots	p_sojae	NIL-4060S	Inoculated	NA	8.44237	6.66932	4.54807	5.11347	4.85848	3.84494	6.44685	1.90162	6.24881	3.2932	10.5614	8.23843	7.206	6.53652	4.05603	8.36618	7.55394	1.90162	5.7154	1.90162	4.47699	1.90162	2.65166	6.20572	7.51917	1.90162	3.59636	1.90162	1.90162	6.11545	3.11192	1.90162	10.4272	1.90162	4.54807	4.23963	4.91324
Dorrance_SRR18185501	SAMN26344686	Soybean	NA	roots	p_sojae	NIL-3064R	Inoculated	NA	8.68081	6.99279	4.6594	5.40315	5.22139	4.71563	7.25139	1.84224	6.36369	1.84224	10.8316	8.35039	6.92316	6.15672	3.9256	8.40674	7.8033	1.84224	6.0299	1.84224	4.96775	1.84224	1.84224	6.29182	7.62476	1.84224	4.18801	1.84224	1.84224	6.19663	3.33638	1.84224	10.4526	1.84224	4.33933	5.29687	5.10017
Dorrance_SRR18185502	SAMN26344684	Soybean	NA	roots	p_sojae	NIL-3064S	Inoculated	NA	8.51985	7.43345	3.60024	4.15506	4.68494	6.25374	5.62489	1.90356	5.80964	1.90356	10.5482	7.3164	5.41289	5.72023	3.11538	6.79591	7.33658	1.90356	6.27481	1.90356	3.29684	1.90356	2.34018	4.9706	6.62592	1.90356	2.34018	1.90356	1.90356	6.1662	4.15506	1.90356	11.1667	1.90356	2.65463	4.40657	5.48708
Dorrance_SRR18185503	SAMN26344687	Soybean	NA	roots	p_sojae	NIL-3064R	mock	NA	8.12516	5.99221	5.10751	5.0788	6.64772	3.66057	7.90217	2.0104	6.75121	3.49345	9.44435	8.93256	7.48842	6.06708	4.12532	9.21679	7.77401	1.65724	5.72254	1.65724	5.43639	1.65724	2.27015	7.47749	8.22331	1.65724	5.0495	1.65724	1.65724	3.87878	3.08197	1.65724	5.96114	1.65724	5.10751	3.19714	5.24305
Dorrance_SRR18185504	SAMN26344685	Soybean	NA	roots	p_sojae	NIL-3064S	mock	NA	8.16127	5.90489	4.90033	5.52939	6.65944	4.00586	7.90678	1.76516	6.88552	2.86337	9.72174	8.48499	7.30082	6.15115	4.28731	8.78049	7.74323	1.76516	6.0238	1.76516	5.44661	1.76516	2.15582	7.07175	8.0207	1.76516	5.05758	1.76516	1.76516	4.52212	3.92578	1.76516	8.35503	1.76516	5.19929	3.75048	4.81473
Dorrance_SRR18185505	SAMN26344683	Soybean	NA	roots	p_sojae	NIL-4213S	mock	NA	8.20586	5.76883	5.79242	5.59188	5.94756	4.27819	7.88803	1.78791	6.0876	3.07611	9.35032	8.3948	7.92048	6.42589	4.68515	9.18875	7.94698	1.78791	5.79242	1.78791	5.50884	1.78791	2.70902	7.29411	8.29931	1.78791	4.58022	1.78791	1.78791	3.48695	1.78791	1.78791	6.37994	1.78791	5.6447	2.90547	5.00156
Dorrance_SRR18185506	SAMN26344682	Soybean	NA	roots	p_sojae	NIL-4213S	Inoculated	NA	8.39694	6.37344	5.00109	5.60375	5.60375	3.94039	6.23207	1.89505	5.84494	2.32891	10.25	7.85861	7.62015	6.48446	3.44032	7.95813	7.48429	1.89505	5.31384	1.89505	5.05016	1.89505	1.89505	6.77394	7.90591	1.89505	3.71266	1.89505	1.89505	5.89942	2.64161	1.89505	10.6871	1.89505	4.22502	2.64161	5.89942
Dorrance_SRR18185507	SAMN26344679	Soybean	NA	roots	p_sojae	NIL-4060R	mock	NA	7.58773	5.56449	5.46987	4.71563	6.81197	4.26569	6.935	1.84224	5.98502	3.6027	8.32812	8.15165	7.80974	5.86629	4.26569	9.17087	7.16354	1.84224	4.82186	1.84224	5.46987	1.84224	3.00495	7.09131	7.85407	1.84224	5.05737	1.84224	1.84224	3.82602	3.18085	1.84224	5.70955	1.84224	5.18211	1.84224	5.62428
Dorrance_SRR18185508	SAMN26344676	Soybean	NA	roots	p_sojae	NIL-4060S	mock	NA	8.03678	5.51943	5.35451	5.77567	6.57552	4.0062	7.31026	1.83677	6.51435	3.46473	9.07856	8.91962	8.03678	5.99313	4.95404	9.63471	7.99263	1.83677	5.72254	1.83677	5.55026	1.83677	2.55196	7.58019	8.13654	1.83677	5.63898	1.83677	1.83677	4.09329	2.995	1.83677	5.74935	1.83677	5.74935	2.25151	5.80152
Dorrance_SRR18185509	SAMN26344681	Soybean	NA	roots	p_sojae	NIL-4213R	mock	NA	8.04459	5.88871	5.61473	5.36158	6.57731	3.98213	8.0744	2.10168	5.74768	3.22942	9.1873	8.0617	8.31815	6.15115	3.98213	9.17163	8.01415	1.72486	6.10235	1.72486	5.70472	1.72486	1.72486	7.23485	8.23008	1.72486	4.87154	1.72486	2.10168	3.65616	2.59976	1.72486	5.68274	2.10168	5.05411	3.098	4.52023
Dorrance_SRR18185510	SAMN26344680	Soybean	NA	roots	p_sojae	NIL-4213R	Inoculated	NA	7.99325	5.94733	5.25192	5.25192	5.45046	3.84901	6.81041	1.90356	6.27481	2.65463	10.1974	8.26999	7.24346	6.02404	4.24394	8.35653	7.21104	1.90356	5.02148	1.90356	4.74681	1.90356	3.11538	6.1662	7.99325	1.90356	3.73016	1.90356	1.90356	6.02404	3.29684	1.90356	9.64445	1.90356	4.06023	1.90356	5.3743
sansomeana_SRR25655517	SAMN37004687	Soybean	Susceptible	shoots	sansomeana	Williams 82	Inoculated	8 hpi	9.22317	7.66277	5.06626	2.15072	2.15072	6.5941	9.57679	2.15072	8.87238	2.15072	11.9678	10.6949	8.1119	7.99234	5.50928	10.6172	9.10763	2.15072	10.0177	2.15072	6.68108	2.15072	4.6114	10.1594	10.0426	2.15072	6.48552	2.15072	3.93649	5.65989	9.09976	2.15072	9.41079	2.15072	8.54941	6.96142	8.4248
sansomeana_SRR25655518	SAMN37004688	Soybean	Susceptible	shoots	sansomeana	Williams 82	Inoculated	8 hpi	8.83617	9.23727	7.40455	2.18462	7.27005	7.6487	9.22174	2.18462	7.94202	7.4137	10.4629	10.3531	6.63513	2.18462	2.18462	10.0705	9.44327	2.18462	10.2213	2.18462	2.18462	2.18462	6.58742	10.1683	10.9252	2.18462	6.43402	2.18462	2.18462	8.75936	2.18462	2.18462	9.46542	2.18462	7.17644	7.94202	8.60029
sansomeana_SRR25655519	SAMN37004689	Soybean	Susceptible	shoots	sansomeana	Williams 82	mock	8 hpi	8.61188	6.97365	5.39842	2.15846	2.15846	5.84479	9.80215	2.15846	8.78157	2.15846	10.8422	10.3983	9.61831	7.30603	6.82618	10.76	9.26932	2.15846	10.7109	2.15846	6.33803	2.15846	4.04834	10.7012	10.0228	2.15846	7.47232	2.15846	2.15846	6.64731	8.12578	2.15846	7.58364	2.15846	9.75367	5.39842	6.70475
sansomeana_SRR25655520	SAMN37004690	Soybean	Susceptible	shoots	sansomeana	Williams 82	mock	8 hpi	9.4153	7.31888	6.63851	4.27714	2.15081	6.48578	9.7546	2.15081	9.40256	2.15081	10.8533	11.0036	9.00774	8.0151	5.63126	10.5887	8.8289	2.15081	10.2178	2.15081	6.75001	2.15081	2.15081	10.4848	10.2008	2.15081	7.96977	2.15081	2.15081	5.87243	9.24025	2.15081	7.81817	2.15081	8.63201	5.84755	7.02955
sansomeana_SRR25655521	SAMN37004691	Soybean	Susceptible	shoots	sansomeana	Williams 82	Inoculated	4 hpi	9.19983	8.04714	5.26654	3.33204	3.0449	6.26263	9.19774	2.08002	9.02271	4.86327	12.2294	11.4038	8.56663	7.93646	5.16734	11.1171	8.10614	2.08002	8.99417	2.08002	6.97797	2.08002	2.08002	9.41432	9.23278	2.08002	6.87731	2.08002	2.08002	6.01962	7.75551	2.08002	9.41969	2.08002	9.06907	7.43985	8.44535
sansomeana_SRR25655522	SAMN37004692	Soybean	Susceptible	shoots	sansomeana	Williams 82	Inoculated	4 hpi	9.11234	7.24392	8.32884	5.65942	2.15056	7.14546	9.5515	2.15056	9.4039	2.15056	12.4845	11.5539	8.46567	7.50441	7.4227	11.7588	9.08869	2.15056	10.3731	2.15056	2.15056	2.15056	2.15056	10.0158	10.0611	2.15056	7.0177	2.15056	2.15056	5.57097	7.99184	2.15056	8.95268	2.15056	10.2822	8.43683	8.81856
sansomeana_SRR25655523	SAMN37004693	Soybean	Susceptible	shoots	sansomeana	Williams 82	mock	4 hpi	8.43734	8.39939	6.36808	2.15072	2.15072	6.82806	9.517	2.15072	9.04345	6.22098	11.9184	11.5749	9.5091	7.38917	7.24442	11.2765	9.10501	2.15072	9.27765	2.15072	7.73904	2.15072	2.15072	9.93614	9.80681	2.15072	6.70894	2.15072	2.15072	5.50928	5.82197	2.15072	7.12544	2.15072	10.1758	7.94043	8.50244
sansomeana_SRR25655524	SAMN37004694	Soybean	Susceptible	shoots	sansomeana	Williams 82	mock	4 hpi	9.4723	7.69389	5.22187	4.0461	2.73563	4.89656	8.8161	2.73563	9.33041	3.42202	12.1306	11.6499	8.75795	6.75086	5.94819	11.1512	8.68098	2.122	9.64772	2.122	6.92792	2.122	3.66345	9.75175	8.96691	2.122	5.78587	2.9465	2.122	5.71027	6.99307	2.122	7.7702	2.122	9.03034	7.34878	8.37782
sansomeana_SRR25655525	SAMN37004695	Soybean	Susceptible	shoots	sansomeana	Williams 82	Inoculated	2 hpi	10.8889	9.25064	6.22453	2.20795	2.20795	6.18013	10.0494	2.20795	8.08037	2.20795	12.9225	11.6015	7.45588	8.29317	5.98742	11.0377	8.89693	2.20795	9.4247	2.20795	6.55515	2.20795	2.20795	9.19321	9.16504	2.20795	6.28867	2.20795	2.20795	5.46477	5.38862	2.20795	9.18482	2.20795	8.59296	9.63032	8.98337
sansomeana_SRR25655526	SAMN37004696	Soybean	Susceptible	shoots	sansomeana	Williams 82	Inoculated	2 hpi	11.7829	10.7776	5.79704	2.16913	2.16913	8.28488	9.55943	2.16913	8.22587	3.21533	13.3787	11.8565	6.93439	7.24298	5.46334	11.2407	9.33586	4.46765	9.9797	2.16913	6.04508	2.16913	2.53926	8.36909	9.48799	2.16913	6.69425	2.16913	2.16913	5.11739	5.11739	2.16913	8.62266	2.16913	7.01795	9.78055	8.30877
sansomeana_SRR25655527	SAMN37004697	Soybean	Susceptible	shoots	sansomeana	Williams 82	mock	2 hpi	10.4398	8.90423	5.44583	2.90481	2.22915	6.12234	9.81243	2.22915	6.68396	2.22915	12.0042	11.4727	7.78899	7.56389	4.87421	11.139	8.61308	2.22915	9.99581	2.22915	5.36505	2.22915	2.22915	9.54861	9.56673	2.22915	6.12234	2.22915	2.22915	6.63325	5.8534	2.22915	7.74192	2.22915	8.86083	10.0305	8.5733
sansomeana_SRR25655528	SAMN37004698	Soybean	Susceptible	shoots	sansomeana	Williams 82	mock	2 hpi	11.5378	10.1209	5.46658	2.15846	3.49904	8.30818	9.56505	3.19514	7.7291	2.15846	13.0533	12.2005	6.37389	7.00828	4.80061	11.035	9.20362	4.13602	9.81362	2.15846	6.77347	2.15846	2.15846	9.11376	9.25497	2.15846	6.24425	2.15846	2.79353	5.65356	2.15846	2.15846	7.98804	2.15846	7.68698	9.67686	8.23212
sansomeana_SRR25655529	SAMN37004699	Soybean	Susceptible	shoots	sansomeana	Senaki	Inoculated	16 hpi	9.02972	7.9227	5.71597	5.89664	2.15072	4.66974	9.92728	2.15072	8.45389	4.02973	11.3424	10.0247	8.98486	9.08655	5.74322	11.1483	9.21349	2.15072	10.3	2.15072	6.77633	2.15072	2.15072	10.4895	9.49917	2.15072	8.20774	2.15072	2.15072	7.86197	8.84441	2.15072	10.1301	2.15072	8.90284	6.07865	8.71305
sansomeana_SRR25655530	SAMN37004700	Soybean	Susceptible	shoots	sansomeana	Senaki	Inoculated	16 hpi	9.18079	8.26755	4.3959	3.46288	2.14128	6.15314	10.3046	2.14128	8.32594	2.14128	11.2402	10.281	9.24506	9.0826	5.41695	11.2119	9.20013	2.14128	10.8179	2.14128	7.45922	2.14128	2.14128	10.038	10.3312	2.14128	6.83637	2.14128	2.14128	8.10262	8.86962	2.14128	9.85483	2.14128	9.2497	6.66593	8.45633
sansomeana_SRR25655531	SAMN37004701	Soybean	Susceptible	shoots	sansomeana	Senaki	mock	16 hpi	8.4248	7.23487	6.12077	2.15072	2.15072	5.06626	10.7114	2.15072	8.16816	2.15072	10.2815	10.0643	9.56921	8.89377	6.01306	11.222	9.20373	2.15072	10.4855	2.15072	6.46932	2.15072	5.06626	10.5893	10.408	2.15072	7.07281	2.15072	2.15072	7.77901	7.52855	2.15072	8.20285	2.15072	10.6543	5.7962	7.10462
sansomeana_SRR25655532	SAMN37004702	Soybean	Susceptible	shoots	sansomeana	Senaki	mock	16 hpi	8.672	7.8527	6.43655	3.16014	4.24985	5.91234	9.29809	2.14003	9.13228	2.14003	11.615	10.2837	9.17677	7.46328	5.16015	10.657	8.96197	2.14003	9.86597	2.14003	6.89302	2.49998	4.5223	10.206	10.046	2.14003	7.38958	2.14003	2.14003	6.91654	9.09413	2.14003	10.1276	2.14003	9.26413	7.55603	8.672
sansomeana_SRR25655533	SAMN37004703	Soybean	Susceptible	shoots	sansomeana	Senaki	Inoculated	8 hpi	8.07069	6.71193	2.21081	2.21081	2.21081	6.45515	10.1491	2.21081	8.35288	2.21081	11.2286	10.4237	8.52332	7.82474	5.35672	10.6563	9.08869	2.21081	10.2658	2.21081	6.84657	2.21081	2.21081	9.58436	9.88468	2.21081	7.39768	2.21081	2.21081	6.63132	8.13639	2.21081	9.68958	2.21081	9.06434	6.18828	6.98275
sansomeana_SRR25655534	SAMN37004704	Soybean	Susceptible	shoots	sansomeana	Senaki	Inoculated	8 hpi	9.18483	7.59274	4.64197	5.89731	2.11993	6.04747	9.89803	2.11993	8.53602	2.11993	11.6861	10.8078	8.01309	7.76967	5.38693	10.6963	8.91901	2.11993	10.4003	2.11993	5.62423	2.11993	4.79636	10.3035	10.3517	2.11993	7.55746	2.11993	5.3543	6.73168	9.29175	2.11993	9.20549	2.11993	9.73391	4.46868	8.23922
sansomeana_SRR25655535	SAMN37004705	Soybean	Susceptible	shoots	sansomeana	Senaki	mock	8 hpi	8.38651	7.51283	5.57143	2.15072	2.15072	6.50154	10.5456	2.15072	7.91674	2.15072	10.2652	10.1506	9.96674	7.95794	4.6114	11.1915	9.61408	2.15072	10.7293	2.15072	6.80242	2.15072	3.72855	10.5291	9.93467	2.15072	7.75249	2.15072	2.15072	7.69794	7.79209	2.15072	7.63401	2.15072	9.8943	4.19929	7.75916
sansomeana_SRR25655536	SAMN37004706	Soybean	Susceptible	shoots	sansomeana	Senaki	mock	8 hpi	8.86263	6.63259	4.57085	4.80061	2.15846	5.5939	10.8613	3.74594	8.48654	4.69037	10.9276	11.0791	9.2788	7.30603	6.58749	10.9736	9.41403	2.15846	10.6168	2.15846	5.73865	2.15846	2.15846	10.8382	10.1638	2.15846	8.04473	2.15846	2.15846	7.29672	8.51891	2.15846	7.36955	2.15846	9.74001	5.36308	7.97059
sansomeana_SRR25655537	SAMN37004707	Soybean	Susceptible	shoots	sansomeana	Senaki	Inoculated	4 hpi	10.1831	8.61441	5.28276	4.53021	5.60839	6.77858	9.0619	2.14302	9.93041	2.14302	12.8581	12.6616	8.17838	7.68746	5.35407	11.5382	8.60352	3.71117	11.148	2.14302	6.17816	2.14302	3.16582	10.4353	9.41754	2.14302	6.98305	2.14302	2.14302	7.19149	7.44856	2.14302	8.77518	2.14302	7.91603	7.09103	6.29122
sansomeana_SRR25655538	SAMN37004708	Soybean	Susceptible	shoots	sansomeana	Senaki	Inoculated	4 hpi	9.48809	7.41178	2.22915	2.22915	2.22915	2.22915	8.93595	2.22915	9.27869	2.22915	12.4718	12.2167	8.40221	7.44155	2.22915	11.4188	9.13731	2.22915	10.6918	2.22915	2.22915	2.22915	2.22915	10.4312	9.12514	2.22915	2.22915	2.22915	2.22915	6.26248	6.84117	2.22915	9.04984	2.22915	10.191	6.32775	9.02711
sansomeana_SRR25655539	SAMN37004709	Soybean	Susceptible	shoots	sansomeana	Senaki	mock	4 hpi	8.57233	7.49694	5.60153	2.15072	2.15072	5.57143	9.83709	2.15072	8.84754	2.15072	11.9075	11.636	8.65339	7.75249	4.93017	11.3546	8.86621	2.15072	10.1002	2.15072	7.15612	3.48279	4.19929	10.3866	9.55009	2.15072	7.83695	2.15072	2.15072	6.62368	6.97296	2.15072	8.43734	2.15072	9.31437	7.52855	8.25573
sansomeana_SRR25655540	SAMN37004710	Soybean	Susceptible	shoots	sansomeana	Senaki	mock	4 hpi	8.7456	7.97328	5.31872	3.948	3.73951	5.35493	9.4536	2.15559	8.99749	4.79288	11.987	11.8878	8.51786	7.40437	5.12254	11.0377	8.54154	2.15559	10.6753	2.15559	6.62386	2.15559	4.04147	10.3804	9.40495	2.15559	7.88348	2.15559	2.15559	5.93516	6.81741	2.15559	7.90798	2.15559	9.68026	6.59397	7.69925
sansomeana_SRR25655541	SAMN37004711	Soybean	Susceptible	shoots	sansomeana	Senaki	Inoculated	2 hpi	11.1093	9.10902	5.81899	2.19609	2.19609	5.70126	9.37196	2.19609	7.13347	2.19609	12.862	12.0958	7.39241	8.76545	3.26605	11.459	9.08869	2.19609	10.285	2.19609	6.14616	2.19609	4.66826	9.33298	9.32555	2.19609	8.05675	2.19609	2.19609	6.55496	4.22701	2.19609	9.06212	2.19609	8.55714	9.56303	8.77275
sansomeana_SRR25655542	SAMN37004712	Soybean	Susceptible	shoots	sansomeana	Senaki	Inoculated	2 hpi	11.2202	9.69115	4.97699	5.4107	2.15072	6.12077	9.85901	2.15072	7.36311	2.15072	13.2683	11.8829	6.5639	8.9619	6.41959	11.0503	9.93171	2.15072	10.1956	2.15072	6.09987	4.66974	2.15072	8.40791	9.36776	2.15072	7.38054	2.15072	2.15072	6.45293	3.93649	2.15072	8.1119	2.15072	8.39939	9.50513	9.47909
sansomeana_SRR25655543	SAMN37004713	Soybean	Susceptible	shoots	sansomeana	Senaki	mock	2 hpi	10.8453	8.14454	6.32333	3.13137	2.12496	5.55483	10.0336	3.67019	7.29033	4.70922	12.3541	12.0794	8.2556	8.55607	5.2305	11.3507	9.18037	2.12496	10.3907	2.12496	6.43775	2.12496	2.12496	10.0984	9.37743	2.12496	7.77356	2.12496	2.12496	7.68372	2.12496	2.12496	7.96551	2.12496	8.89603	9.30611	8.03463
sansomeana_SRR25655544	SAMN37004714	Soybean	Susceptible	shoots	sansomeana	Senaki	mock	2 hpi	11.0407	9.07322	2.15072	2.15072	3.48279	6.12077	9.21834	2.15072	6.89021	3.72855	12.9323	11.7089	6.53306	8.53392	5.26773	11.1297	9.16907	3.18047	9.8559	2.15072	7.65563	2.15072	4.42036	8.41638	8.58366	2.15072	7.11507	2.15072	3.93649	5.82197	3.93649	2.15072	7.65563	2.15072	7.70487	9.5635	8.41215
sansomeana_SRR25655545	SAMN37004715	Soybean	Resistant	shoots	sansomeana	NE2701N	Inoculated	16 hpi	9.88365	8.67826	6.07865	3.48279	2.15072	3.72855	8.85379	2.15072	9.47098	4.02973	11.5185	10.2652	8.42059	8.58741	5.4107	10.9066	8.61711	2.15072	9.21105	2.15072	6.99575	2.15072	3.48279	9.273	9.72904	2.15072	7.83063	2.15072	2.15072	8.21261	8.03697	2.15072	10.6463	2.15072	9.05435	5.22964	7.67694
sansomeana_SRR25655546	SAMN37004716	Soybean	Resistant	shoots	sansomeana	NE2701N	Inoculated	16 hpi	8.45286	8.32301	5.24462	2.18462	2.18462	6.26231	9.35348	2.18462	9.07963	2.18462	11.5662	9.78721	8.19629	8.63197	5.89499	10.7231	9.11088	2.18462	9.63527	2.18462	7.70191	2.18462	2.18462	9.83223	9.83393	2.18462	5.0698	2.18462	2.18462	7.74602	9.03885	2.18462	10.7286	2.18462	9.25009	6.79767	8.72304
sansomeana_SRR25655547	SAMN37004717	Soybean	Resistant	shoots	sansomeana	NE2701N	mock	16 hpi	8.59726	7.96939	4.76779	3.10228	3.6355	5.97467	9.79501	2.10978	9.07774	4.01555	9.95585	10.1383	7.80866	7.97984	5.97467	11.1106	9.76057	2.10978	9.99115	2.10978	8.17893	2.10978	3.92996	10.3775	10.0014	2.10978	8.05095	2.10978	2.10978	7.04626	7.64098	2.10978	6.74904	2.10978	9.4805	6.24137	5.64702
sansomeana_SRR25655548	SAMN37004718	Soybean	Resistant	shoots	sansomeana	NE2701N	mock	16 hpi	10.3193	9.93908	6.29641	2.78127	2.15072	6.20149	9.64144	4.11709	6.99575	2.15072	12.4751	11.7808	6.57908	8.18313	5.92069	11.0958	8.7604	3.18047	9.68064	2.15072	6.80242	2.15072	2.15072	9.22799	9.13611	2.15072	7.19603	2.15072	2.15072	6.1617	3.18047	2.15072	8.32035	2.15072	8.2884	9.84339	9.20618
sansomeana_SRR25655549	SAMN37004719	Soybean	Resistant	shoots	sansomeana	NE2701N	Inoculated	8 hpi	9.09777	8.10461	4.21851	2.15846	2.15846	6.86449	9.43538	2.15846	9.44595	2.15846	12.3173	10.5857	8.35824	9.25737	5.91955	10.9313	9.25737	2.15846	10.1727	2.15846	7.16993	2.15846	2.15846	9.78229	9.72621	2.15846	6.50904	2.15846	2.15846	7.13902	8.8178	2.15846	11.2551	2.15846	8.43234	7.10743	8.88454
sansomeana_SRR25655550	SAMN37004720	Soybean	Resistant	shoots	sansomeana	NE2701N	Inoculated	8 hpi	9.0892	8.13775	5.92069	2.15072	2.15072	6.35049	9.72223	2.15072	8.79004	2.15072	11.9544	10.8397	7.98097	8.51827	6.60897	10.3952	8.9619	2.15072	9.66651	2.15072	7.54409	2.15072	5.57143	9.09185	9.28692	2.15072	8.05878	2.15072	2.15072	7.58975	7.64125	2.15072	11.0297	2.15072	9.84966	7.54409	8.26982
sansomeana_SRR25655551	SAMN37004721	Soybean	Resistant	shoots	sansomeana	NE2701N	mock	8 hpi	9.18079	8.13484	5.8677	4.12107	2.06327	6.55929	9.90987	2.06327	9.62706	2.06327	10.9646	11.1812	8.37702	7.73737	6.22345	10.7889	9.04039	2.06327	10.1041	2.06327	6.99723	2.06327	4.18827	10.5603	9.95916	2.06327	8.79233	2.06327	2.06327	6.40113	8.80027	2.06327	8.54707	2.06327	9.07788	6.55929	7.26544
sansomeana_SRR25655552	SAMN37004722	Soybean	Resistant	shoots	sansomeana	NE2701N	mock	8 hpi	8.36842	7.63781	4.79773	3.45668	2.13834	6.86383	9.31704	2.13834	9.41279	3.90713	11.9985	11.8806	8.79217	8.00312	6.20259	11.5159	9.08869	2.13834	9.81606	2.13834	6.7769	3.45668	3.45668	9.91676	9.68922	2.13834	6.87584	2.13834	2.13834	6.20259	6.29493	2.13834	8.27637	2.13834	9.19067	7.66573	8.789
sansomeana_SRR25655553	SAMN37004723	Soybean	Resistant	shoots	sansomeana	NE2701N	Inoculated	4 hpi	8.82212	8.53282	5.8034	3.6953	2.13601	5.87662	9.17348	2.13601	8.84355	4.51162	12.2558	11.6759	8.28239	7.77123	4.84118	11.5716	9.21635	2.13601	9.61557	2.13601	6.78235	2.13601	3.45174	9.60665	9.30287	2.13601	6.62146	2.13601	2.13601	6.78235	7.14002	2.13601	9.64725	2.13601	8.98525	7.513	9.25798
sansomeana_SRR25655554	SAMN37004724	Soybean	Resistant	shoots	sansomeana	NE2701N	Inoculated	4 hpi	7.07699	6.52287	2.26234	2.26234	2.26234	2.26234	9.35052	2.26234	10.0642	2.26234	12.1016	11.3782	8.11939	7.68596	6.70905	11.5658	6.33189	2.26234	10.0261	2.26234	2.26234	2.26234	2.26234	9.4531	9.60154	2.26234	8.19613	2.26234	2.26234	8.62409	2.26234	2.26234	9.60154	2.26234	8.57225	7.75523	8.56262
sansomeana_SRR25655555	SAMN37004725	Soybean	Resistant	shoots	sansomeana	NE2701N	mock	4 hpi	9.18079	8.28081	6.48796	2.1166	2.1166	6.61607	9.63833	2.1166	9.3479	2.1166	12.1343	11.5889	8.77418	7.60958	6.51743	11.8331	9.29998	2.1166	9.65829	2.1166	6.34733	2.1166	2.1166	10.1646	9.48837	2.1166	8.08817	2.1166	2.1166	7.08806	6.60239	2.1166	8.93014	2.1166	9.28293	7.73398	8.85138
sansomeana_SRR25655556	SAMN37004726	Soybean	Resistant	shoots	sansomeana	NE2701N	mock	4 hpi	8.41094	7.80326	4.80061	2.15846	2.15846	6.14394	9.53766	2.15846	9.14261	2.15846	10.7901	10.9215	8.593	8.64892	5.17202	10.7976	9.50167	2.15846	10.5132	2.15846	7.48056	2.15846	4.29639	10.7532	9.94896	2.15846	8.63052	2.15846	2.15846	7.33359	8.46178	2.15846	7.71519	2.15846	9.48743	7.05319	8.34926
sansomeana_SRR25655557	SAMN37004727	Soybean	Resistant	shoots	sansomeana	NE2701N	Inoculated	2 hpi	10.325	9.55497	8.11863	2.21475	2.21475	2.21475	10.4722	2.21475	7.55738	2.21475	12.6126	12.3149	7.84366	7.76967	2.21475	11.5918	8.76955	2.21475	9.97437	2.21475	6.88632	2.21475	2.21475	9.16832	8.93099	2.21475	5.05354	2.21475	2.21475	7.7312	7.53075	2.21475	9.05453	2.21475	8.43813	10.9427	9.09144
sansomeana_SRR25655558	SAMN37004728	Soybean	Resistant	shoots	sansomeana	NE2701N	Inoculated	2 hpi	9.6809	8.80123	2.22412	2.22412	2.22412	6.31358	9.11939	2.22412	9.33614	2.22412	11.7429	11.9071	8.25542	8.17001	2.22412	11.018	9.08869	2.22412	10.1877	2.22412	7.53109	2.22412	2.22412	9.63064	9.25552	2.22412	6.66962	2.22412	2.22412	7.9348	7.38712	2.22412	6.10831	2.22412	8.99909	8.786	8.40246
sansomeana_SRR25655559	SAMN37004729	Soybean	Resistant	shoots	sansomeana	NE2701N	mock	2 hpi	7.50037	8.34502	6.39223	2.76707	2.14177	6.48993	9.19691	2.14177	8.94479	3.16345	11.0235	10.4757	9.11512	8.04116	6.70861	10.7199	9.38842	2.14177	10.347	2.14177	7.09749	2.14177	2.14177	10.0516	9.97778	2.14177	8.03038	2.14177	2.14177	6.97915	8.32311	2.14177	8.80002	2.14177	9.66763	5.98619	7.73088
sansomeana_SRR25655560	SAMN37004730	Soybean	Resistant	shoots	sansomeana	NE2701N	mock	2 hpi	8.49063	7.6582	6.60268	2.15846	2.15846	6.44305	9.71053	2.15846	8.77153	2.15846	9.86488	10.6056	8.64892	7.71519	5.56311	11.0777	9.93253	2.15846	10.0114	2.15846	8.18246	2.15846	2.15846	10.2531	9.93403	2.15846	8.24185	2.15846	2.15846	6.60268	7.97643	2.15846	7.05319	2.15846	9.64605	6.98529	6.08022
sansomeana_SRR25655561	SAMN37004731	Soybean	Resistant	shoots	sansomeana	Colfax	Inoculated	16 hpi	9.77093	7.94043	5.57143	3.48279	2.15072	6.57908	9.71366	2.15072	9.03523	2.15072	11.5288	9.89884	8.12746	8.59116	6.14138	11.0972	9.26833	2.15072	9.56159	2.15072	7.28199	2.15072	3.72855	9.82918	9.65403	2.15072	7.31861	2.15072	2.15072	7.38054	8.8693	2.15072	10.4447	2.15072	8.12229	4.27692	8.56091
sansomeana_SRR25655562	SAMN37004732	Soybean	Resistant	shoots	sansomeana	Colfax	Inoculated	16 hpi	9.40654	8.44977	6.07865	4.42036	2.15072	7.27269	8.93562	2.15072	9.07857	2.15072	11.4644	9.436	8.77035	8.74367	5.26773	10.4249	9.12323	2.15072	9.76597	2.15072	6.31466	2.15072	4.88175	9.67005	9.77916	2.15072	3.18047	2.15072	2.15072	7.53634	8.66054	2.15072	10.7045	2.78127	8.19794	6.24021	7.81789
sansomeana_SRR25655563	SAMN37004733	Soybean	Resistant	shoots	sansomeana	Colfax	mock	16 hpi	8.37352	6.33269	5.5407	2.15072	5.06626	3.72855	9.76928	2.15072	9.29383	2.15072	10.4164	9.44016	9.27533	8.14795	4.55054	10.8039	9.81964	2.15072	10.0817	2.15072	7.51283	3.72855	4.66974	10.1366	10.0683	2.15072	6.90233	2.15072	2.15072	5.37627	7.78556	2.15072	7.1662	2.15072	10.1224	6.01306	8.42059
sansomeana_SRR25655564	SAMN37004734	Soybean	Resistant	shoots	sansomeana	Colfax	mock	16 hpi	8.47834	5.20338	6.13829	2.23488	2.23488	3.91464	9.56782	2.23488	8.2306	2.23488	9.73322	9.88889	9.14204	7.16501	4.88875	11.0377	9.39131	2.23488	10.1066	2.23488	7.0261	2.23488	4.48427	10.1544	9.75537	2.23488	7.99363	2.23488	2.23488	6.18657	7.53467	2.23488	7.88089	2.23488	9.60157	5.24969	7.61618
sansomeana_SRR25655565	SAMN37004735	Soybean	Resistant	shoots	sansomeana	Colfax	Inoculated	8 hpi	8.39771	8.38365	5.13116	2.19038	2.19038	5.48846	8.60587	2.19038	9.70296	2.19038	11.7699	10.639	7.32712	7.72683	5.85818	10.5929	9.08869	2.19038	10.4119	2.19038	6.03678	2.19038	3.56564	9.96937	9.81374	2.19038	5.34054	2.19038	3.69721	6.12969	9.55604	2.19038	10.2953	2.19038	8.81944	7.4492	9.30311
sansomeana_SRR25655566	SAMN37004736	Soybean	Resistant	shoots	sansomeana	Colfax	Inoculated	8 hpi	7.14509	7.93029	3.39893	2.2677	2.2677	4.97103	9.20002	2.2677	8.93926	2.2677	12.1083	10.6349	8.90116	8.58753	4.84746	10.9356	9.43951	2.2677	10.2362	2.2677	7.13198	2.2677	2.2677	9.74291	9.30298	2.2677	6.27672	2.2677	2.2677	7.11876	8.90116	2.2677	11.0055	2.2677	9.03034	6.20339	9.22183
sansomeana_SRR25655567	SAMN37004737	Soybean	Resistant	shoots	sansomeana	Colfax	mock	8 hpi	8.86892	7.23959	5.71084	2.15846	2.15846	6.60268	10.0549	2.15846	9.77561	4.44029	11.0238	10.4348	8.26111	7.34267	6.67632	10.831	9.18609	2.15846	10.0452	2.15846	6.52507	2.15846	4.44029	10.4337	9.82822	2.15846	7.82284	2.15846	2.15846	6.2825	8.47008	2.15846	7.70819	2.15846	9.0376	4.99836	7.11804
sansomeana_SRR25655568	SAMN37004738	Soybean	Resistant	shoots	sansomeana	Colfax	mock	8 hpi	7.63874	7.45919	5.16766	2.1569	2.1569	3.19219	10.133	2.1569	8.64035	2.1569	10.339	9.95437	9.6171	7.08118	6.33334	11.0377	10.0759	2.1569	10.2791	2.1569	7.97738	2.1569	4.56678	10.3311	9.79062	2.1569	7.77855	2.1569	2.1569	7.42555	7.48392	2.1569	7.45086	2.1569	9.54649	6.58276	8.65494
sansomeana_SRR25655569	SAMN37004739	Soybean	Resistant	shoots	sansomeana	Colfax	Inoculated	4 hpi	8.12578	7.43887	6.22474	2.15846	2.15846	4.90291	8.97481	2.15846	9.15296	2.15846	12.0428	11.5476	7.61393	7.74287	6.83906	11.5437	8.70626	4.21851	9.30456	2.15846	7.05319	2.15846	4.04834	9.72794	9.20113	2.15846	7.1494	5.08782	2.15846	6.22474	8.15182	2.15846	8.94832	2.15846	9.38798	6.97365	9.13741
sansomeana_SRR25655570	SAMN37004740	Soybean	Resistant	shoots	sansomeana	Colfax	Inoculated	4 hpi	9.22201	7.60071	4.58257	5.05354	5.32653	6.42848	9.2711	2.21475	9.07002	2.21475	11.9245	11.6388	8.96122	7.76967	5.19654	11.3217	9.78831	2.21475	10.493	2.21475	5.98056	2.21475	5.75334	9.69146	9.59622	2.21475	6.17673	2.21475	2.21475	5.59062	5.8136	2.21475	7.32913	2.21475	9.77135	6.46647	7.9942
sansomeana_SRR25655571	SAMN37004741	Soybean	Resistant	shoots	sansomeana	Colfax	mock	4 hpi	7.98559	8.47487	6.45189	2.18462	2.18462	6.74066	9.31496	2.18462	8.32786	2.18462	11.5231	11.3594	9.16602	7.29005	7.18715	11.5754	9.51936	2.18462	9.16332	2.18462	6.26231	2.18462	2.18462	9.61361	9.60166	2.18462	6.96877	2.18462	5.32463	6.41592	7.6641	2.18462	7.99171	2.18462	9.97185	7.44079	8.81217
sansomeana_SRR25655572	SAMN37004742	Soybean	Resistant	shoots	sansomeana	Colfax	mock	4 hpi	8.98479	8.53998	6.70292	2.07039	2.07039	6.98403	9.80831	2.65309	9.6814	2.07039	12.044	11.8527	8.28758	7.22717	6.36795	11.921	9.15193	2.07039	9.99115	2.07039	5.60077	2.07039	2.07039	10.1204	9.74695	2.07039	7.97669	2.07039	3.31121	5.41635	7.3125	2.07039	8.00493	2.07039	8.72392	8.27217	7.75634
sansomeana_SRR25655573	SAMN37004743	Soybean	Resistant	shoots	sansomeana	Colfax	Inoculated	2 hpi	10.481	9.28143	4.98679	2.22915	2.22915	6.19412	9.21692	2.22915	8.53239	2.22915	12.3908	11.9353	6.26248	7.37111	4.68665	11.5797	8.6895	2.22915	9.33263	2.22915	6.28457	2.22915	2.22915	9.95167	9.14336	2.22915	6.58068	2.22915	3.64545	5.88267	4.68665	2.22915	8.55072	2.22915	9.06266	9.77979	9.14638
sansomeana_SRR25655574	SAMN37004744	Soybean	Resistant	shoots	sansomeana	Colfax	Inoculated	2 hpi	11.2455	9.99748	5.69737	2.22915	2.22915	6.30632	9.25932	2.22915	7.23039	2.22915	12.9659	11.5919	7.45134	8.08772	3.90218	10.9933	9.21979	2.22915	9.72437	2.22915	7.29705	3.4961	2.22915	9.90436	9.53487	2.22915	5.72996	2.22915	2.22915	6.54455	2.22915	2.22915	6.8262	2.22915	8.51383	9.98068	8.21382
sansomeana_SRR25655575	SAMN37004745	Soybean	Resistant	shoots	sansomeana	Colfax	mock	2 hpi	9.40106	8.77489	5.89506	2.15846	2.15846	6.14394	9.93703	2.15846	5.13054	2.15846	11.7841	11.3105	8.34023	7.28736	5.43291	10.7793	9.63502	2.15846	9.10845	2.15846	6.92615	4.29639	4.99836	9.73829	9.2788	2.15846	6.73263	2.15846	2.15846	5.7927	5.96732	2.15846	7.52108	2.15846	8.98354	8.86892	8.65257
sansomeana_SRR25655576	SAMN37004746	Soybean	Resistant	shoots	sansomeana	Colfax	mock	2 hpi	10.4779	9.65371	6.02338	2.24965	2.24965	5.19377	9.64928	2.24965	6.44754	2.24965	12.6665	11.7236	7.34498	7.35589	2.24965	11.6318	9.53874	2.24965	9.96821	2.24965	8.32989	2.24965	2.24965	9.4499	9.22444	2.24965	8.02959	2.24965	2.24965	5.50036	5.46037	2.24965	8.48203	2.24965	8.43136	10.1562	9.00984
sansomeana_SRR25655577	SAMN37004683	Soybean	Susceptible	shoots	sansomeana	Williams 82	Inoculated	16 hpi	9.14696	8.02192	6.50422	2.18462	2.18462	6.41592	9.21391	2.18462	8.49223	2.83487	11.4134	10.1202	9.01502	8.48358	5.36302	10.9801	8.69707	2.18462	9.9734	2.18462	6.81158	2.18462	2.83487	10.1924	9.86759	2.18462	7.08781	2.18462	2.18462	7.29005	8.53056	2.18462	10.3895	2.18462	8.77363	6.78363	8.84295
sansomeana_SRR25655578	SAMN37004684	Soybean	Susceptible	shoots	sansomeana	Williams 82	Inoculated	16 hpi	9.18079	7.50881	2.11383	7.34706	5.57821	3.64479	10.4838	2.11383	6.73736	4.6784	10.0201	10.6994	8.92917	8.64422	5.46231	11.0321	9.43002	2.11383	10.6801	2.11383	7.46442	3.93993	4.45227	10.2618	9.35096	2.11383	8.29301	2.11383	3.64479	7.33067	8.04432	2.11383	6.99838	2.11383	9.17162	2.11383	6.12688
sansomeana_SRR25655579	SAMN37004685	Soybean	Susceptible	shoots	sansomeana	Williams 82	mock	16 hpi	9.18079	6.92512	6.61993	4.1368	2.19565	5.60494	9.71344	2.19565	8.26132	4.04155	10.2488	10.4118	8.84247	7.76484	4.845	10.8077	8.92007	2.19565	9.70203	2.19565	6.92512	2.85224	3.26523	10.3546	9.84556	2.19565	7.66645	2.19565	2.19565	6.07573	7.75013	2.19565	6.61993	2.19565	9.91147	6.21089	5.78921
sansomeana_SRR25655580	SAMN37004686	Soybean	Susceptible	shoots	sansomeana	Williams 82	mock	16 hpi	8.56109	5.77411	5.12158	4.93604	4.32693	6.28063	9.66233	2.17065	7.5427	2.17065	10.0197	10.1515	8.85281	7.62902	5.95538	10.746	9.88912	2.17065	10.192	2.17065	6.63955	3.98338	2.17065	10.8262	9.60154	2.17065	8.03178	2.17065	2.17065	5.36132	8.04896	2.17065	7.14482	2.17065	9.95135	6.60897	6.2212
soy_db_SRR10198737	SAMN12868631	Soybean		roots	p_sojae	Misty	mock	14 DPI	9.88709	7.30155	6.04937	6.78414	7.30155	3.90994	8.61213	1.36291	6.52023	3.35361	9.12485	8.61431	9.70392	8.83499	5.06689	9.69774	7.09757	1.36291	6.48237	1.36291	8.05481	1.36291	3.26556	6.88914	9.39567	1.36291	3.90994	1.36291	1.36291	7.5911	2.84334	1.36291	8.76774	1.36291	5.98312	3.43643	6.32012
soy_db_SRR10198738	SAMN12868630	Soybean		roots	p_sojae	Misty	mock	7 DPI	9.95226	7.71193	4.43221	6.33359	7.68414	3.75913	7.83076	1.62994	4.98254	4.13504	8.35608	8.75043	10.0589	9.15398	4.78696	10.355	7.24469	3.08076	7.21587	1.62994	8.08036	1.62994	4.04996	7.74593	8.92383	1.62994	3.86283	1.62994	1.62994	6.16283	1.62994	1.62994	6.48626	1.62994	6.66752	3.2454	7.3894
soy_db_SRR10198739	SAMN12868629	Soybean		roots	p_sojae	Misty	mock	7 DPI	9.61378	7.47319	5.05903	6.09527	7.15663	3.80467	8.44176	1.45051	5.20608	3.03001	7.91876	8.61474	9.42577	8.79725	4.58669	10.0024	7.52447	2.57124	7.37726	1.45051	7.76615	1.45051	2.89378	7.59547	8.53084	1.45051	3.47029	1.45051	1.45051	6.00182	1.45051	1.45051	7.22022	1.45051	5.73767	4.30205	7.44389
soy_db_SRR10198740	SAMN12868628	Soybean		roots	p_sojae	Misty	mock	7 DPI	9.60736	7.14062	4.16631	5.98069	7.26127	3.55451	8.34743	1.64446	4.76652	3.89314	7.90425	9.10676	9.54733	8.48179	4.39549	9.92145	7.23204	2.10716	7.34556	1.64446	7.74784	1.64446	3.99014	7.39035	8.74234	1.64446	4.16631	1.64446	1.64446	5.83271	1.64446	1.64446	6.19787	1.64446	6.25712	3.27286	7.14062
soy_db_SRR10198741	SAMN12868673	Soybean		roots	p_sojae	PI 449459	Inoculated	21 DPI	9.06035	5.288	5.51422	7.58957	6.37972	2.99449	9.0752	1.68801	5.61526	2.77139	8.3351	8.3351	8.67233	5.61526	4.55943	9.57664	8.98059	1.68801	6.47237	1.68801	6.89015	1.68801	2.50333	7.91414	8.6645	1.68801	4.68897	1.68801	1.68801	6.26005	2.77139	1.68801	7.21371	1.68801	5.44269	2.77139	5.93485
soy_db_SRR10198742	SAMN12868672	Soybean		roots	p_sojae	PI 449459	Inoculated	21 DPI	9.81556	5.42258	4.57205	6.98433	7.70917	2.46653	8.78213	1.66345	4.43695	2.95203	9.02446	9.71367	9.43765	6.95998	5.05931	10.5937	7.4099	1.66345	7.32664	1.66345	8.69998	1.66345	2.13206	8.43879	8.78213	1.66345	4.80918	1.66345	1.66345	5.82461	1.66345	1.66345	5.87759	1.66345	5.38646	2.46653	5.9287
soy_db_SRR10198743	SAMN12868627	Soybean		roots	p_sojae	Misty	mock	4 DPI	9.73253	7.88426	3.93515	6.29264	7.89717	3.71744	8.02422	1.8441	4.48624	3.14415	9.67996	10.7723	8.80255	7.32021	4.48624	11.1143	8.31461	1.8441	7.91421	1.44599	8.17318	1.44599	2.88461	8.52607	8.41975	1.44599	3.63673	1.44599	1.44599	5.40158	1.44599	1.44599	3.71744	1.44599	6.67899	5.47237	6.91735
soy_db_SRR10198744	SAMN12868671	Soybean		roots	p_sojae	PI 449459	Inoculated	21 DPI	7.19303	5.65891	4.73056	6.21878	4.73056	6.21878	5.65891	4.73056	4.73056	4.73056	6.9352	6.21878	6.9352	4.73056	4.73056	5.65891	7.9195	4.73056	4.73056	4.73056	5.65891	4.73056	4.73056	5.65891	5.65891	4.73056	4.73056	4.73056	4.73056	4.73056	4.73056	4.73056	8.29435	4.73056	4.73056	4.73056	5.65891
soy_db_SRR10198745	SAMN12868670	Soybean		roots	p_sojae	PI 449459	Inoculated	14 DPI	10.3617	9.00413	6.06692	8.40326	5.88761	4.70587	8.23011	1.5526	7.10368	1.5526	11.8816	9.94668	7.63266	7.15743	4.65681	9.74494	9.61648	1.5526	5.60747	1.5526	5.94989	1.5526	1.98604	7.45086	9.36176	1.5526	5.29181	1.5526	1.5526	6.71886	5.92943	1.5526	9.96439	1.5526	3.09663	1.5526	6.35467
soy_db_SRR10198746	SAMN12868669	Soybean		roots	p_sojae	PI 449459	Inoculated	14 DPI	10.1156	8.75867	5.62063	7.54086	6.54873	4.86503	8.31443	1.32134	7.04514	2.32874	10.917	9.99371	8.14815	7.08597	4.27537	10.1184	9.55158	1.32134	6.28378	1.32134	5.98385	1.32134	1.93736	7.55339	9.36041	1.32134	4.89165	1.32134	1.67635	7.12567	5.13376	1.32134	9.92305	1.32134	3.61736	2.75242	7.66922
soy_db_SRR10198747	SAMN12868668	Soybean		roots	p_sojae	PI 449459	Inoculated	14 DPI	10.4753	8.87295	6.73467	8.27478	6.4441	5.2662	9.3501	1.47289	7.72685	2.17561	11.0385	9.67151	8.43595	7.15341	4.06689	9.74996	10.1936	1.47289	6.71429	1.47289	6.84193	1.47289	2.17561	7.29741	9.78458	1.47289	4.00065	1.47289	1.47289	8.35597	6.07981	1.47289	11.1027	1.47289	3.85814	2.4127	7.26973
soy_db_SRR10198748	SAMN12868667	Soybean		roots	p_sojae	PI 449459	inoculated	7 DPI	9.35531	8.51697	3.6361	6.30486	7.19261	3.55049	7.77116	1.44572	5.16488	3.25699	10.5292	9.77317	8.68014	7.29366	4.34134	10.0202	8.47455	1.44572	6.92501	1.44572	6.74638	1.44572	2.56241	8.1546	8.67265	1.44572	3.45934	1.44572	1.44572	6.90811	2.56241	1.44572	8.48314	1.44572	5.35166	5.01486	7.09891
soy_db_SRR10198749	SAMN12868666	Soybean		roots	p_sojae	PI 449459	Inoculated	7 DPI	9.27697	8.33092	4.95907	6.86076	6.48715	3.80938	8.53862	1.5024	6.69982	2.92225	9.87909	9.43295	8.56297	6.40867	4.60656	10.0933	8.52628	1.1935	6.04346	1.1935	5.39916	1.1935	2.34794	7.98157	8.80938	1.1935	3.63465	1.5024	1.1935	7.34101	4.60656	1.1935	9.19168	1.1935	4.58287	3.53843	8.15982
soy_db_SRR10198750	SAMN12868665	Soybean		roots	p_sojae	PI 449459	Inoculated	7 DPI	9.49744	9.00823	5.19146	5.94914	6.74174	3.96374	8.63171	1.5523	6.85448	3.09606	10.3494	10.107	9.32818	6.30713	4.04253	10.4755	8.15645	1.5523	6.13922	1.5523	5.15666	1.5523	2.54723	8.22515	8.93834	1.5523	3.23882	1.5523	1.5523	7.89698	5.49978	1.5523	9.5009	1.5523	5.58073	2.75616	8.44631
soy_db_SRR10198751	SAMN12868664	Soybean		roots	p_sojae	PI 449459	Inoculated	4 DPI	10.3168	7.77403	6.79138	7.98462	5.80718	4.83712	9.57811	1.44189	7.36481	2.8763	11.2115	9.60567	8.70826	7.15341	4.8722	8.28659	8.08128	1.44189	6.50948	1.44189	5.09635	1.44189	1.83862	7.79242	9.21716	1.44189	3.01193	1.44189	1.44189	8.97501	5.18266	1.44189	11.1615	1.44189	3.62706	4.0535	5.77052
soy_db_SRR10198752	SAMN12868663	Soybean		roots	p_sojae	PI 449459	Inoculated	4 DPI	9.31859	7.67646	6.04661	7.17948	4.05883	4.64585	9.66801	1.77983	8.22303	2.63947	10.8736	9.16274	8.47771	7.24191	4.56977	8.4568	8.00637	1.39806	6.18018	1.39806	5.81972	1.39806	2.47384	7.96256	9.24429	1.39806	4.00186	1.39806	1.39806	7.925	4.88422	1.39806	10.34	1.39806	3.94252	3.03972	6.56915
soy_db_SRR10198753	SAMN12868662	Soybean		roots	p_sojae	PI 449459	Inoculated	4 DPI	9.75693	8.63789	4.69118	6.79854	6.49715	6.88342	8.244	1.47447	6.85568	2.94207	10.7018	9.76192	7.58691	7.28111	4.55943	10.0469	8.28271	1.47447	6.56725	1.47447	4.95843	1.47447	2.17805	8.004	8.81397	1.47447	3.20517	1.47447	1.88216	7.13492	5.74409	1.47447	9.97565	1.47447	3.70333	2.78861	8.14817
soy_db_SRR10198754	SAMN12868626	Soybean		roots	p_sojae	Misty	mock	4 DPI	9.91245	9.20927	3.85997	6.01114	7.90747	3.98737	7.40595	1.41563	4.73048	2.6741	10.6302	10.7296	8.47771	8.40314	4.65611	10.7796	8.97003	2.50663	8.1864	1.41563	7.54603	1.41563	3.1901	8.48576	8.48308	1.41563	2.50663	1.80342	1.41563	5.43295	1.41563	1.41563	4.86856	1.41563	6.50949	6.82939	6.75137
soy_db_SRR10198755	SAMN12868661	Soybean		roots	p_sojae	PI 449459	mock	21 DPI	10.156	5.23076	4.15345	7.09794	8.15362	2.32233	8.90688	1.5682	4.9248	2.00669	8.13994	9.45368	9.77598	6.66056	5.64674	10.1285	7.77143	1.5682	7.1893	1.5682	8.78036	1.5682	3.12699	8.55845	9.23955	1.5682	4.29248	1.5682	1.5682	6.86283	3.51998	1.5682	7.99554	1.5682	5.74644	2.32233	6.88487
soy_db_SRR10198756	SAMN12868660	Soybean		roots	p_sojae	PI 449459	mock	21 DPI	9.22898	5.74043	4.41361	5.89982	7.00426	3.99405	8.59606	1.56582	4.07311	3.12236	9.44923	9.16991	9.1474	6.17382	4.73763	10.6419	7.03402	2.00353	7.0438	1.56582	7.7232	1.56582	3.91033	7.5759	8.7444	2.00353	3.62467	1.56582	1.56582	6.29348	2.96206	1.56582	7.0438	1.56582	6.22633	3.91033	6.95327
soy_db_SRR10198757	SAMN12868659	Soybean		roots	p_sojae	PI 449459	mock	21 DPI	9.41081	5.79804	4.56046	5.87384	7.11539	3.95947	8.46216	2.08809	4.13504	3.39254	9.04894	9.27069	9.44226	5.15467	4.49777	11.0932	6.9502	2.41608	7.3894	1.62994	8.21755	1.62994	3.95947	7.88059	8.97633	2.08809	3.2454	1.62994	1.62994	6.05842	1.62994	1.62994	6.16283	1.62994	6.6096	3.86283	7.3894
soy_db_SRR10198758	SAMN12868658	Soybean		roots	p_sojae	PI 449459	mock	14 DPI	9.26623	7.08312	3.80775	5.74508	7.65456	3.47322	7.50785	1.34642	6.49695	3.13273	10.8425	10.0667	9.09239	8.59244	4.17339	9.59067	7.44756	2.37652	6.84501	1.34642	7.45228	1.34642	3.13273	7.66681	8.65119	1.34642	3.03269	1.34642	1.34642	6.02458	3.13273	1.34642	8.24275	1.34642	6.96236	5.1641	6.96236
soy_db_SRR10198759	SAMN12868657	Soybean		roots	p_sojae	PI 449459	mock	14 DPI	9.28471	7.74013	4.22299	6.31155	6.91049	2.25535	7.89826	1.38184	7.07192	2.44343	11.1797	10.6939	8.81484	8.97074	4.89992	9.77328	7.85648	1.75802	6.52063	1.38184	6.77837	1.38184	2.25535	7.39215	8.92001	1.38184	3.11389	1.38184	1.38184	6.39885	2.44343	1.38184	8.1103	1.38184	5.7884	4.40343	7.79747
soy_db_SRR10198760	SAMN12868656	Soybean		roots	p_sojae	PI 449459	mock	14 DPI	8.8589	7.06396	3.70333	5.19851	6.27428	3.70333	7.45756	1.79433	4.38864	4.08682	10.5023	10.0333	8.35135	7.92278	4.55943	10.1494	8.21791	1.79433	6.11955	1.79433	6.34583	1.79433	2.30237	7.39148	8.44662	1.79433	4.19467	1.79433	1.79433	5.34552	2.66076	1.79433	7.52075	1.79433	5.52075	4.55943	7.41385
soy_db_SRR10198761	SAMN12868655	Soybean		roots	p_sojae	PI 449459	mock	7 DPI	9.27113	7.30155	3.30923	6.50126	7.88295	2.85777	9.53702	1.16948	5.90165	3.51353	10.3242	9.95724	10.105	8.26521	5.18537	10.6635	6.86959	1.16948	6.88326	1.16948	8.18838	1.16948	4.24054	7.34501	8.30637	1.69274	2.29427	1.16948	1.16948	5.91945	1.16948	1.16948	6.82779	1.16948	5.90165	5.55946	8.13606
soy_db_SRR10198762	SAMN12868654	Soybean		roots	p_sojae	PI 449459	mock	7 DPI	9.13734	6.74878	4.12116	6.43213	6.91001	3.59203	8.38493	1.66345	4.69551	3.82784	9.22934	9.16689	9.87374	8.02889	4.96442	10.1528	7.43661	1.66345	7.26834	1.66345	7.70185	1.66345	4.20689	7.54699	8.27079	1.66345	2.73135	1.66345	1.66345	5.7696	1.66345	1.66345	6.55103	1.66345	5.05931	4.12116	8.549
soy_db_SRR10198763	SAMN12868653	Soybean		roots	p_sojae	PI 449459	mock	7 DPI	8.91771	7.89769	3.29531	6.51697	7.35048	3.29531	9.27962	2.31544	5.24524	4.26544	10.5428	10.4874	9.51717	7.28728	4.55943	10.6993	7.14174	1.13077	6.98744	1.13077	7.63787	1.13077	3.68457	8.41248	8.06134	1.13077	2.5945	1.41639	1.13077	5.46807	1.13077	1.13077	4.9192	1.13077	6.1346	4.45338	9.16376
soy_db_SRR10198764	SAMN12868652	Soybean		roots	p_sojae	PI 449459	mock	4 DPI	9.47375	9.02028	3.24308	5.79038	8.04424	3.03001	7.38207	2.16906	5.67849	3.03001	10.6655	10.9807	8.31696	7.86722	4.80778	10.6909	7.7782	1.39365	7.81732	1.11424	7.27966	1.11424	3.42772	8.205	8.12522	1.11424	2.70612	1.60236	1.11424	4.75774	1.11424	1.11424	4.63372	1.11424	6.06821	4.55772	7.61488
soy_db_SRR10198765	SAMN12868625	Soybean		roots	p_sojae	Misty	mock	4 DPI	9.87229	8.72795	3.7487	6.18469	7.80637	3.90821	7.42345	1.90836	5.07773	3.1205	10.1594	10.7605	9.29654	7.97663	4.41138	11.0804	8.47042	2.65112	7.83618	1.49412	7.83618	1.49412	3.1205	8.15672	8.43839	1.49412	3.46955	1.49412	1.49412	4.90064	1.49412	1.49412	4.65457	1.49412	6.57489	6.15345	6.80336
soy_db_SRR10198766	SAMN12868651	Soybean		roots	p_sojae	PI 449459	mock	4 DPI	9.51899	8.99906	3.64721	5.71802	7.31886	4.62053	7.32787	1.62994	5.23358	3.39254	11.1419	11.0726	8.59495	6.40345	4.43221	10.3812	8.58747	1.62994	7.21587	1.62994	6.92667	1.62994	3.75913	8.13784	8.21269	1.62994	2.41608	1.62994	1.62994	4.98254	1.62994	1.62994	4.49777	1.62994	5.60392	4.67817	7.58993
soy_db_SRR10198767	SAMN12868650	Soybean		roots	p_sojae	PI 449459	mock	4 DPI	9.33411	7.55012	4.43976	5.70567	7.0847	4.06371	7.60361	1.44599	5.13682	2.13375	10.3144	10.117	8.65328	7.32659	4.23712	9.76105	7.41303	1.8441	7.17935	1.44599	7.16518	1.44599	2.36654	7.57176	8.50092	1.44599	3.25758	1.44599	1.44599	6.7376	3.02053	1.44599	7.81792	1.44599	5.92335	4.29053	7.25485
soy_db_SRR10198768	SAMN12868649	Soybean		roots	p_sojae	PI 449459	mock	0 DPI	9.15824	7.30155	3.20497	6.05975	7.62274	2.519	7.27038	1.69851	3.89865	3.20497	8.56241	9.44316	9.79853	7.12694	4.64835	10.3276	6.90136	1.69851	7.34209	1.69851	7.41991	1.69851	4.1025	7.91246	7.9974	1.69851	2.1779	1.69851	1.69851	6.03522	1.69851	1.69851	3.78459	1.69851	4.99261	2.1779	7.48471
soy_db_SRR10198769	SAMN12868648	Soybean		roots	p_sojae	PI 449459	mock	0 DPI	9.22561	7.66294	3.95947	6.0366	8.08568	3.39254	7.8867	1.62994	4.67817	4.04996	8.96771	9.348	9.54046	7.64142	4.56046	10.1185	7.94054	2.08809	7.25418	1.62994	7.89884	1.62994	3.86283	8.47032	8.35608	1.62994	2.67635	1.62994	1.62994	6.14254	1.62994	1.62994	4.36351	1.62994	5.41378	2.67635	7.6981
soy_db_SRR10198770	SAMN12868647	Soybean		roots	p_sojae	PI 449459	mock	0 DPI	9.55011	7.72563	4.29134	5.74519	8.14805	2.89363	7.57487	1.62994	4.21532	3.2454	8.99058	9.6683	9.52878	7.71879	4.67817	10.4186	7.94054	1.62994	7.79872	1.62994	7.8621	1.62994	3.64721	8.09099	8.26052	1.62994	2.89363	1.62994	1.62994	6.0366	1.62994	1.62994	4.13504	1.62994	5.82375	1.62994	7.98108
soy_db_SRR10198771	SAMN12868646	Soybean		roots	p_sojae	Misty	Inoculated	14 DPI	9.49919	7.6558	5.74519	6.6096	6.3863	5.15467	8.07502	1.62994	6.01444	2.41608	10.2523	9.08393	8.68183	7.45665	4.56046	9.46693	7.76595	1.62994	6.29735	1.62994	6.50226	1.62994	1.62994	7.44013	8.82231	1.62994	3.75913	1.62994	1.62994	6.78993	4.43221	1.62994	10.3023	1.62994	4.62053	2.89363	6.82853
soy_db_SRR10198772	SAMN12868645	Soybean		roots	p_sojae	Misty	Inoculated	14 DPI	9.12158	8.42231	5.67987	5.3761	5.3761	6.49475	4.46215	3.61487	4.46215	3.61487	8.3381	7.01222	4.99058	3.61487	3.61487	7.62331	8.10317	3.61487	5.3761	3.61487	3.61487	3.61487	4.46215	4.46215	7.8831	3.61487	3.61487	3.61487	3.61487	5.93062	5.67987	3.61487	9.77801	3.61487	3.61487	3.61487	4.46215
soy_db_SRR10198773	SAMN12868644	Soybean		roots	p_sojae	Misty	Inoculated	14 DPI	10.2034	9.20661	6.40345	8.76003	6.60476	4.843	8.79071	1.17115	7.78601	1.17115	11.5143	9.85009	7.40001	7.23489	4.6632	9.56215	8.78828	1.17115	5.58818	1.17115	5.54273	1.17115	1.17115	7.24202	9.36505	1.17115	5.16167	1.17115	2.03561	6.3517	5.33173	1.17115	9.74372	1.87861	4.12751	1.17115	6.35827
soy_db_SRR10198774	SAMN12868643	Soybean		roots	p_sojae	Misty	Inoculated	14 DPI	10.0816	8.24386	5.57765	6.61511	5.8065	4.96944	7.8667	1.64446	7.3815	1.64446	10.4664	8.80654	7.76154	6.74495	4.08095	9.51129	9.74304	1.64446	6.8513	1.64446	5.57765	1.64446	1.64446	6.6597	9.0604	1.64446	2.70023	1.64446	1.64446	8.127	4.82	1.64446	10.5887	1.64446	4.39549	3.89314	8.48179
soy_db_SRR10198775	SAMN12868642	Soybean		roots	p_sojae	Misty	Inoculated	7 DPI	9.5459	6.81243	6.45851	7.09066	6.65799	3.07654	9.23466	1.32279	6.69629	3.74456	9.59334	8.98223	8.67989	7.64682	4.99783	9.5269	8.16113	1.32279	6.69629	1.32279	6.21642	1.32279	2.15152	8.13348	9.50873	1.32279	4.19604	1.67832	1.32279	7.23813	4.31952	1.32279	8.99611	1.32279	4.81463	2.33151	7.02597
soy_db_SRR10198776	SAMN12868624	Soybean		roots	p_sojae	Misty	mock	0 DPI	9.5913	7.63735	4.22665	5.6745	7.98254	3.91754	7.89826	1.56908	4.64528	3.82849	9.22463	9.81322	9.9954	8.4355	5.33272	10.6343	7.92513	2.78612	7.97742	1.56908	8.06217	1.56908	3.6316	7.88737	8.27766	1.56908	2.00785	1.56908	1.56908	5.62288	1.56908	1.56908	6.3816	1.56908	6.28531	4.69622	8.01792
soy_db_SRR10198777	SAMN12868641	Soybean		roots	p_sojae	Misty	Inoculated	7 DPI	10.4896	9.51664	3.59151	4.34228	5.48674	4.60784	2.6962	1.81854	5.29972	1.81854	12.0568	9.82674	5.48674	6.87073	4.43638	9.46754	7.86277	2.33362	6.78425	1.81854	3.74753	1.81854	2.33362	7.04449	8.48398	1.81854	1.81854	1.81854	2.33362	5.76497	6.1161	1.81854	12.6089	1.81854	2.33362	3.21526	5.69081
soy_db_SRR10198778	SAMN12868640	Soybean		roots	p_sojae	Misty	Inoculated	7 DPI	9.84617	8.22934	5.24214	7.05653	6.75051	3.96374	8.19763	1.79096	6.75051	3.36823	10.4477	9.16344	8.31752	7.95754	4.38197	9.94113	8.13875	1.40635	6.5238	1.40635	5.53406	1.40635	1.40635	7.81438	9.15686	1.40635	3.16929	1.40635	1.40635	7.09146	4.28833	1.40635	10.6811	1.40635	4.42659	2.80363	7.34981
soy_db_SRR10198779	SAMN12868639	Soybean		roots	p_sojae	Misty	Inoculated	4 DPI	9.43034	6.26795	6.50948	6.8275	6.08604	3.99074	8.82005	1.44189	6.88004	2.72549	10.7702	9.37345	8.06246	7.15341	4.47559	9.13308	8.6054	1.44189	7.47708	1.44189	6.1445	1.44189	1.83862	7.96043	9.15279	1.83862	4.0535	1.44189	1.44189	8.1182	4.38117	1.44189	10.0734	1.44189	4.33152	2.35949	7.28263
soy_db_SRR10198780	SAMN12868638	Soybean		roots	p_sojae	Misty	Inoculated	4 DPI	9.88593	7.04302	6.68868	7.27088	5.66778	2.43797	9.37533	1.64446	6.83842	2.43797	10.3178	9.25699	7.90425	7.50067	4.08095	8.94806	8.22915	1.64446	7.55675	1.64446	6.43869	1.64446	2.70023	7.6481	9.12807	1.64446	2.43797	1.64446	1.64446	8.24386	5.51427	1.64446	10.6011	1.64446	3.10729	2.919	6.68868
soy_db_SRR10198781	SAMN12868637	Soybean		roots	p_sojae	Misty	Inoculated	4 DPI	10.3812	8.52247	4.27442	7.74014	6.75789	5.00967	7.88568	1.62226	9.15478	2.40447	10.6278	9.50749	6.26014	7.94465	4.27442	10.5756	8.85927	1.62226	6.98839	1.62226	4.91831	1.62226	2.66368	7.3703	9.40204	1.62226	4.27442	1.62226	1.62226	7.50178	6.2786	1.62226	11.3679	1.62226	2.40447	3.63156	7.24453
soy_db_SRR10198782	SAMN12868636	Soybean		roots	p_sojae	Misty	mock	21 DPI	9.9033	5.26577	6.19666	6.05254	7.85606	4.67266	9.42157	1.62752	3.64227	3.24079	8.31886	9.20985	9.98211	6.9788	4.97692	10.5405	7.90483	1.62752	8.16719	1.62752	8.5201	1.62752	3.75411	7.92861	9.5932	1.62752	4.286	1.62752	1.62752	5.96322	2.0849	1.62752	6.09521	1.62752	6.77086	4.35814	6.78396
soy_db_SRR10198783	SAMN12868635	Soybean		roots	p_sojae	Misty	mock	21 DPI	9.75692	6.41835	5.09095	6.22463	7.4284	3.96374	9.13665	1.48654	4.33867	2.81183	9.51963	9.40018	9.7363	7.1374	4.95455	10.3658	7.79531	1.48654	7.57496	1.48654	7.89636	1.48654	3.64443	7.7651	9.26636	1.48654	3.34625	1.48654	1.48654	6.44401	1.89826	1.48654	7.03136	1.48654	6.19471	6.00079	7.16852
soy_db_SRR10198784	SAMN12868634	Soybean		roots	p_sojae	Misty	mock	21 DPI	9.6627	6.19899	6.11045	6.2824	7.33009	4.61211	9.00108	1.55514	4.75947	4.04897	9.70412	9.39688	9.49454	6.74914	4.55943	10.4997	7.74898	1.55514	7.39148	1.55514	7.99131	1.55514	3.24452	7.76066	9.28406	1.55514	3.49262	1.55514	1.55514	6.14652	2.55199	1.55514	7.1816	1.55514	6.09207	4.71201	6.37652
soy_db_SRR10198785	SAMN12868633	Soybean		roots	p_sojae	Misty	mock	14 DPI	9.74424	6.90223	4.6635	6.62195	6.69917	4.23425	8.38623	1.32134	6.44493	2.86795	9.56814	8.86637	9.15924	8.13154	4.60031	9.32796	6.90875	1.67635	6.53194	1.32134	7.16974	1.32134	2.97437	6.94725	9.07339	1.32134	3.55142	1.32134	1.67635	7.84259	3.48224	1.32134	9.28102	1.32134	5.57215	3.61736	6.16901
soy_db_SRR10198786	SAMN12868632	Soybean		roots	p_sojae	Misty	mock	14 DPI	9.60153	6.55983	4.53759	6.33245	6.8877	3.86625	8.04741	1.34648	5.71407	3.47336	9.03857	9.1373	9.18921	8.56013	4.6073	9.95219	6.77141	2.67904	7.30341	1.34648	7.54834	1.34648	3.13286	7.10148	8.95274	1.34648	3.74704	1.34648	1.34648	6.78647	2.37663	1.34648	7.70315	1.34648	6.39274	3.97622	6.09903
soy_db_SRR10198787	SAMN12868623	Soybean		roots	p_sojae	Misty	mock	0 DPI	9.42557	7.17651	4.21532	6.01444	7.77915	4.04996	8.30682	1.62994	4.43221	2.67635	9.55011	9.72565	9.53852	7.80519	4.29134	10.1783	7.60483	1.62994	7.61958	1.62994	8.06428	1.62994	2.89363	7.81162	8.45396	1.62994	3.08076	2.08809	1.62994	6.42039	1.62994	1.62994	7.19633	1.62994	5.89825	3.39254	7.91088
soy_db_SRR10198788	SAMN12868622	Soybean		roots	p_sojae	Misty	mock	0 DPI	9.38916	6.73315	4.27319	5.29759	7.50934	3.85972	8.76005	1.92505	5.00626	3.14623	9.52505	9.41974	9.57421	7.60114	4.44226	10.1894	7.39087	1.50666	7.80535	1.50666	7.7151	1.50666	3.14623	7.7151	8.68651	1.50666	3.69	1.50666	1.50666	6.05482	1.50666	1.50666	6.77581	1.50666	5.88982	4.59345	8.18347

## Sheet: Table S7
Study	Study Number	Gene	adjusted_mean	between_var
fusarium	1	WRKY_Glyma.19G094100	9.04135	4.35933
fusarium	1	Dof_Glyma.02G108600	5.88144	1.95367
fusarium	1	MYB_Glyma.07G037700	4.45095	1.74051
fusarium	1	G2-like_Glyma.18G113400	4.25125	1.63929
fusarium	1	WRKY_Glyma.05G127600	7.62307	1.25897
fusarium	1	bZIP_Glyma.02G176800	7.20071	0.943053
fusarium	1	C2H2_Glyma.12G178900	7.35444	0.937239
fusarium	1	ERF_Glyma.15G018400	6.0358	0.821942
fusarium	1	ERF_Glyma.02G261700	6.96649	0.793074
fusarium	1	MYB_Glyma.18G071600	6.70915	0.770408
fusarium	1	WRKY_Glyma.08G218600	11.0978	0.717981
fusarium	1	SBP_Glyma.19G146000	7.12683	0.69416
fusarium	1	SBP_Glyma.12G226000	2.58903	0.523362
fusarium	1	C2H2_Glyma.19G214600	2.64044	0.479819
fusarium	1	LBD_Glyma.02G234600	6.82025	0.449292
fusarium	1	G2-like_Glyma.02G098800	7.58208	0.437051
fusarium	1	HSF_Glyma.20G156800	6.90683	0.378098
fusarium	1	MYB-related_Glyma.10G230700	6.67923	0.34098
fusarium	1	bHLH_Glyma.08G271900	9.95371	0.305415
P.sojaeO	2	WRKY_Glyma.19G094100	7.76149	4.33825
P.sojaeO	2	G2-like_Glyma.18G113400	3.14502	2.44969
P.sojaeO	2	G2-like_Glyma.02G098800	7.36759	1.29348
P.sojaeO	2	WRKY_Glyma.05G127600	5.62234	1.2215
P.sojaeO	2	C2H2_Glyma.12G178900	6.93558	1.14556
P.sojaeO	2	SBP_Glyma.19G146000	5.25984	1.08632
P.sojaeO	2	WRKY_Glyma.08G218600	9.73797	0.871184
P.sojaeO	2	G2-like_Glyma.10G204200	7.27207	0.783909
P.sojaeO	2	MYB_Glyma.18G071600	6.43611	0.690769
P.sojaeO	2	C2H2_Glyma.19G214600	3.71282	0.679481
P.sojaeO	2	G2-like_Glyma.09G211400	8.74357	0.66953
P.sojaeO	2	Dof_Glyma.02G108600	4.78713	0.594626
P.sojaeO	2	LBD_Glyma.02G234600	6.90336	0.542208
P.sojaeO	2	MYB_Glyma.11G052100	9.85629	0.455266
P.sojaeO	2	bHLH_Glyma.08G271900	9.42418	0.454757
P.sojaeO	2	SBP_Glyma.12G226000	2.97108	0.409618
P.sojaeO	2	HSF_Glyma.20G156800	7.06516	0.404124
P.sojaeO	2	ERF_Glyma.15G018400	3.54911	0.379751
P.sojaeO	2	G2-like_Glyma.11G136600	6.91944	0.365904
P.sojaeD	3	WRKY_Glyma.19G094100	8.28314	7.81583
P.sojaeD	3	MYB_Glyma.18G071600	4.96147	2.20884
P.sojaeD	3	ERF_Glyma.15G018400	4.33309	1.0066
P.sojaeD	3	WRKY_Glyma.08G218600	9.80899	0.778576
P.sojaeD	3	LBD_Glyma.02G234600	5.91321	0.777188
P.sojaeD	3	SBP_Glyma.19G146000	4.70807	0.755889
P.sojaeD	3	Dof_Glyma.13G177500	6.73447	0.620813
P.sojaeD	3	AP2_Glyma.03G177500	7.12416	0.594663
P.sojaeD	3	MYB_Glyma.11G052100	8.67661	0.535131
P.sojaeD	3	C2H2_Glyma.12G178900	5.04157	0.456741
P.sojaeD	3	MYB_Glyma.07G037700	2.83761	0.406231
P.sojaeD	3	G2-like_Glyma.09G211400	7.40736	0.32811
P.sojaeD	3	G2-like_Glyma.02G098800	6.17466	0.322521
P.sojaeD	3	Dof_Glyma.02G108600	5.00272	0.274557
P.sojaeD	3	C2H2_Glyma.19G214600	3.15268	0.194528
P.sojaeD	3	MYB-related_Glyma.10G230700	4.07204	0.193735
P.sojaeD	3	WRKY_Glyma.14G006800	7.84189	0.162958
P.sojaeD	3	ERF_Glyma.02G261700	4.21549	0.0665285
P.sojaeD	3	WRKY_Glyma.01G053800	8.20817	0.0657162
scn	4	Dof_Glyma.02G108600	6.0367	0.611169
scn	4	G2-like_Glyma.11G136600	9.56154	0.127195
scn	4	ERF_Glyma.15G018400	5.00375	0.120164
scn	4	G2-like_Glyma.02G098800	7.19958	0.112621
scn	4	LBD_Glyma.02G234600	6.72731	0.0974145
scn	4	WRKY_Glyma.19G094100	8.02892	0.097207
scn	4	SBP_Glyma.19G146000	5.61296	0.0968013
scn	4	WRKY_Glyma.08G218600	10.1601	0.0946745
scn	4	G2-like_Glyma.09G211400	8.27663	0.0907921
scn	4	WRKY_Glyma.05G127600	6.89056	0.0892058
scn	4	MYB-related_Glyma.10G230700	6.27574	0.0828185
scn	4	C2H2_Glyma.12G178900	7.63779	0.0630003
scn	4	SBP_Glyma.12G226000	4.2051	0.0541318
scn	4	ERF_Glyma.11G053600	8.81846	0.0447956
scn	4	C2H2_Glyma.19G214600	4.44598	0.0417326
scn	4	AP2_Glyma.03G177500	8.24529	0.036868
scn	4	bHLH_Glyma.08G271900	9.93717	0.0363677
scn	4	Dof_Glyma.13G177500	8.49638	0.0308242
scn	4	MYB_Glyma.18G071600	5.63201	0.0277671
sansomeana	5	G2-like_Glyma.18G113400	7.00262	2.27868
sansomeana	5	C2H2_Glyma.19G214600	7.26004	2.08042
sansomeana	5	WRKY_Glyma.19G094100	8.59669	1.10256
sansomeana	5	WRKY_Glyma.01G053800	9.22694	0.794321
sansomeana	5	C2H2_Glyma.12G178900	6.55849	0.723422
sansomeana	5	G2-like_Glyma.02G098800	8.0973	0.615118
sansomeana	5	WRKY_Glyma.08G218600	11.6591	0.590108
sansomeana	5	MYB-related_Glyma.10G230700	5.39551	0.556756
sansomeana	5	WRKY_Glyma.05G127600	8.54427	0.540727
sansomeana	5	ERF_Glyma.15G018400	7.07142	0.510812
sansomeana	5	bHLH_Glyma.08G271900	11.0476	0.504251
sansomeana	5	bZIP_Glyma.02G176800	3.02987	0.491778
sansomeana	5	G2-like_Glyma.09G211400	8.32991	0.457015
sansomeana	5	SBP_Glyma.12G226000	3.27238	0.432266
sansomeana	5	ERF_Glyma.02G261700	5.84669	0.335469
sansomeana	5	G2-like_Glyma.10G204200	7.84414	0.319138
sansomeana	5	MYB_Glyma.07G037700	2.82043	0.295106
sansomeana	5	HSF_Glyma.20G156800	8.15743	0.286477
sansomeana	5	MYB_Glyma.18G071600	6.66561	0.282013

## Sheet: Table S8
Sample	BioSample	Plant	Susceptibility	Tissue	Study	Variety	mock/inoculated	Time duration	Glyma.10G065900.Wm82.a6.v1	Glyma.13G151000.Wm82.a6.v1	Glyma.03G190800.Wm82.a6.v1	Glyma.20G188300.Wm82.a6.v1	Glyma.10G202150.Wm82.a6.v1
fusarium_SRR9665527	SAMN12099652	Soybean	Suceptible	roots	fusarium	Sloan	Inoculated	4 DPI	18.0447	13.3734	14.9966	5.60131	6.44892
fusarium_SRR9665535	SAMN12099651	Soybean	Suceptible	roots	fusarium	Sloan	Inoculated	2 DPI	11.7976	14.518	13.7962	4.75884	5.36052
fusarium_SRR9665536	SAMN12099650	Soybean	Suceptible	roots	fusarium	Sloan	Inoculated	0 DPI	16.0775	6.86124	11.0211	5.82307	3.02127
fusarium_SRR9665545	SAMN12099671	Soybean	Suceptible	roots	fusarium	Sloan	mock	7 DPI	19.8728	15.8603	19.3788	5.78289	7.48599
fusarium_SRR9665546	SAMN12099670	Soybean	Suceptible	roots	fusarium	Sloan	mock	4 DPI	8.84433	10.517	11.5808	3.81917	5.16483
fusarium_SRR9665547	SAMN12099669	Soybean	Suceptible	roots	fusarium	Sloan	mock	2 DPI	17.9088	18.2916	20.2032	4.53717	4.98295
fusarium_SRR9665548	SAMN12099668	Soybean	Suceptible	roots	fusarium	Sloan	mock	0 DPI	12.977	12.1435	8.91922	7.00048	3.54031
fusarium_SRR9665549	SAMN12099667	Soybean	Suceptible	roots	fusarium	Sloan	Inoculated	14 DPI	8.0976	6.52475	9.74461	2.81927	3.11073
fusarium_SRR9665550	SAMN12099666	Soybean	Suceptible	roots	fusarium	Sloan	Inoculated	10 DPI	8.7868	6.58194	8.90343	2.25645	3.43038
fusarium_SRR9665551	SAMN12099665	Soybean	Suceptible	roots	fusarium	Sloan	Inoculated	7 DPI	16.5614	19.3435	21.4099	5.54569	6.33834
fusarium_SRR9665552	SAMN12099664	Soybean	Suceptible	roots	fusarium	Sloan	Inoculated	4 DPI	12.2157	10.9768	11.0501	3.63477	3.63631
fusarium_SRR9665554	SAMN12099673	Soybean	Suceptible	roots	fusarium	Sloan	mock	14 DPI	10.9892	6.77219	8.43396	2.62663	3.98874
fusarium_SRR9665555	SAMN12099672	Soybean	Suceptible	roots	fusarium	Sloan	mock	10 DPI	23.69	16.7423	17.7243	6.53315	7.79966
fusarium_SRR9665556	SAMN12099654	Soybean	Suceptible	roots	fusarium	Sloan	Inoculated	10 DPI	18.2301	14.4587	17.924	4.3937	6.11994
fusarium_SRR9665565	SAMN12099679	Soybean	Suceptible	roots	fusarium	Sloan	mock	14 DPI	31.6377	17.6646	18.446	6.56522	8.48085
fusarium_SRR9665567	SAMN12099680	Soybean	Suceptible	roots	fusarium	Sloan	mock	0 DPI	12.2409	9.03512	11.3377	5.79491	3.58077
fusarium_SRR9665568	SAMN12099684	Soybean	Suceptible	roots	fusarium	Sloan	mock	10 DPI	23.6856	13.6247	16.6326	5.21049	6.96811
fusarium_SRR9665570	SAMN12099660	Soybean	Suceptible	roots	fusarium	Sloan	Inoculated	10 DPI	10.9579	6.80592	11.4661	4.03722	3.88159
fusarium_SRR9665571	SAMN12099681	Soybean	Suceptible	roots	fusarium	Sloan	mock	2 DPI	17.801	15.6457	13.3912	5.97621	5.08507
fusarium_SRR9665574	SAMN12099676	Soybean	Suceptible	roots	fusarium	Sloan	mock	4 DPI	14.7496	14.4695	13.0028	4.85706	5.25137
fusarium_SRR9665575	SAMN12099677	Soybean	Suceptible	roots	fusarium	Sloan	mock	7 DPI	21.8607	16.3246	16.783	6.24092	6.69229
fusarium_SRR9665576	SAMN12099674	Soybean	Suceptible	roots	fusarium	Sloan	mock	0 DPI	12.2139	7.82103	9.49472	6.22157	4.27699
fusarium_SRR9665577	SAMN12099675	Soybean	Suceptible	roots	fusarium	Sloan	mock	2 DPI	16.4527	16.9356	10.3252	6.9558	5.2753
fusarium_SRR9665579	SAMN12099655	Soybean	Suceptible	roots	fusarium	Sloan	Inoculated	14 DPI	24.6511	14.6976	20.0749	5.31278	5.82179
fusarium_SRR9665580	SAMN12099656	Soybean	Suceptible	roots	fusarium	Sloan	Inoculated	0 DPI	10.4792	9.07207	10.4745	5.84256	2.57113
fusarium_SRR9665581	SAMN12099657	Soybean	Suceptible	roots	fusarium	Sloan	Inoculated	2 DPI	13.3465	15.3285	12.8066	5.47667	4.64085
fusarium_SRR9665582	SAMN12099658	Soybean	Suceptible	roots	fusarium	Sloan	Inoculated	4 DPI	12.7565	12.8134	12.6361	4.82351	4.71198
fusarium_SRR9665583	SAMN12099659	Soybean	Suceptible	roots	fusarium	Sloan	Inoculated	7 DPI	13.9189	14.4267	13.4195	5.51181	5.1847
fusarium_SRR9665585	SAMN12099661	Soybean	Suceptible	roots	fusarium	Sloan	Inoculated	14 DPI	17.4933	12.0408	17.7598	4.35358	5.79349
fusarium_SRR9665586	SAMN12099662	Soybean	Suceptible	roots	fusarium	Sloan	Inoculated	0 DPI	8.70024	5.69848	7.80878	5.4459	3.45869
fusarium_SRR9665587	SAMN12099663	Soybean	Suceptible	roots	fusarium	Sloan	Inoculated	2 DPI	12.5441	15.3718	10.9778	4.19928	4.12362
fusarium_SRR9665588	SAMN12099678	Soybean	Suceptible	roots	fusarium	Sloan	mock	10 DPI	25.7152	15.0767	20.8422	5.93117	7.58275
fusarium_SRR9665589	SAMN12099685	Soybean	Suceptible	roots	fusarium	Sloan	mock	14 DPI	22.0955	13.891	14.2401	4.96906	6.98813
fusarium_SRR9665590	SAMN12099682	Soybean	Suceptible	roots	fusarium	Sloan	mock	4 DPI	17.4672	17.2431	14.6773	5.30785	6.15813
fusarium_SRR9665591	SAMN12099683	Soybean	Suceptible	roots	fusarium	Sloan	mock	7 DPI	15.4289	15.2719	15.3066	4.77598	5.65671
fusarium_SRR9665596	SAMN12099653	Soybean	Suceptible	roots	fusarium	Sloan	Inoculated	7 DPI	20.4295	13.1195	19.2887	5.08504	6.86155
scn_SRR8937687	SAMN11476347	Soybean	Suceptible	roots	scn	TN09-16N	mock	5 DPI	53.3835	25.9691	23.5452	10.0918	8.59774
scn_SRR8937688	SAMN11476346	Soybean	Suceptible	roots	scn	TN09-16N	mock	5 DPI	60.1958	22.5263	21.666	9.09377	9.78197
scn_SRR8937689	SAMN11476345	Soybean	Suceptible	roots	scn	TN09-16N	mock	5 DPI	40.4261	20.4409	20.1929	7.88487	6.68931
scn_SRR8937690	SAMN11476344	Soybean	Suceptible	roots	scn	TN09-16N	Inoculated	5 DPI	44.8731	24.0652	21.9241	8.83897	8.9989
scn_SRR8937691	SAMN11476343	Soybean	Suceptible	roots	scn	TN09-16N	Inoculated	5 DPI	54.6105	30.8304	27.2029	10.9453	8.64152
scn_SRR8937692	SAMN11476342	Soybean	Suceptible	roots	scn	TN09-16N	Inoculated	5 DPI	41.9227	22.0589	23.4641	8.64895	7.05801
scn_SRR8937693	SAMN11476341	Soybean	Resistant	roots	scn	TN09-29N	mock	5 DPI	44.9288	23.8546	20.7094	9.67194	8.25098
scn_SRR8937694	SAMN11476340	Soybean	Resistant	roots	scn	TN09-29N	mock	5 DPI	46.1941	23.6383	23.4811	8.52702	6.81216
scn_SRR8937695	SAMN11476395	Soybean	Resistant	roots	scn	TN09-29N	mock	5 DPI	47.8631	25.8215	23.3962	9.94299	9.46753
scn_SRR8937696	SAMN11476394	Soybean	Resistant	roots	scn	TN09-29N	Inoculated	5 DPI	36.1919	22.5931	20.7834	9.00493	8.18745
scn_SRR8937697	SAMN11476393	Soybean	Resistant	roots	scn	TN09-29N	Inoculated	5 DPI	58.48	30.4889	23.7349	11.0859	9.86
scn_SRR8937698	SAMN11476392	Soybean	Resistant	roots	scn	TN09-29N	Inoculated	5 DPI	36.3057	19.6768	17.7645	8.38995	6.91639
Dorrance_SRR18185499	SAMN26344678	Soybean	Resistant	roots	p_sojae	NIL-4060R	Inoculated	NA	16.2001	9.31978	14.15	4.53328	4.51657
Dorrance_SRR18185500	SAMN26344677	Soybean	Susceptible	roots	p_sojae	NIL-4060S	Inoculated	NA	16.3826	9.24208	13.9159	4.74263	4.71403
Dorrance_SRR18185501	SAMN26344686	Soybean	Resistant	roots	p_sojae	NIL-3064R	Inoculated	NA	18.3371	11.8649	15.7667	5.03444	5.1414
Dorrance_SRR18185502	SAMN26344684	Soybean	Suceptible	roots	p_sojae	NIL-3064S	Inoculated	NA	12.4716	6.38413	10.2337	4.38689	4.87912
Dorrance_SRR18185503	SAMN26344687	Soybean	Resistant	roots	p_sojae	NIL-3064R	mock	NA	20.8264	14.2056	16.8106	4.77345	6.35417
Dorrance_SRR18185504	SAMN26344685	Soybean	Suceptible	roots	p_sojae	NIL-3064S	mock	NA	18.5926	12.3962	17.0865	5.22301	5.46637
Dorrance_SRR18185505	SAMN26344683	Soybean	Suceptible	roots	p_sojae	NIL-4213S	mock	NA	29.812	17.288	18.6597	7.86018	6.78837
Dorrance_SRR18185506	SAMN26344682	Soybean	Suceptible	roots	p_sojae	NIL-4213S	Inoculated	NA	19.085	11.5507	16.3348	7.22144	5.67438
Dorrance_SRR18185507	SAMN26344679	Soybean	Resistant	roots	p_sojae	NIL-4060R	mock	NA	17.8838	9.93461	14.8036	4.57697	5.96019
Dorrance_SRR18185508	SAMN26344676	Soybean	Suceptible	roots	p_sojae	NIL-4060S	mock	NA	21.8818	12.8077	16.9199	5.16344	5.34361
Dorrance_SRR18185509	SAMN26344681	Soybean	Resistant	roots	p_sojae	NIL-4213R	mock	NA	22.8123	14.7951	16.1703	6.33534	6.78288
Dorrance_SRR18185510	SAMN26344680	Soybean	Resistant	roots	p_sojae	NIL-4213R	Inoculated	NA	21.0464	12.8067	16.1455	7.77686	5.8696
sansomeana_SRR25655517	SAMN37004687	Soybean	Suceptible	shoots	sansomeana	Williams 82	Inoculated	8 hpi	8.61591	7.92	8.83789	4.28623	3.25003
sansomeana_SRR25655518	SAMN37004688	Soybean	Suceptible	shoots	sansomeana	Williams 82	Inoculated	8 hpi	4.71194	1.52981	12.4569	3.23389	4.96861
sansomeana_SRR25655519	SAMN37004689	Soybean	Suceptible	shoots	sansomeana	Williams 82	mock	8 hpi	10.0322	8.60616	10.8011	4.60591	4.75052
sansomeana_SRR25655520	SAMN37004690	Soybean	Suceptible	shoots	sansomeana	Williams 82	mock	8 hpi	12.3658	13.9059	15.8492	5.57073	4.00541
sansomeana_SRR25655521	SAMN37004691	Soybean	Suceptible	shoots	sansomeana	Williams 82	Inoculated	4 hpi	4.7409	5.51077	5.94833	4.00729	3.10818
sansomeana_SRR25655522	SAMN37004692	Soybean	Suceptible	shoots	sansomeana	Williams 82	Inoculated	4 hpi	7.58298	7.91035	5.74168	3.64976	2.85193
sansomeana_SRR25655523	SAMN37004693	Soybean	Suceptible	shoots	sansomeana	Williams 82	mock	4 hpi	7.94423	7.49034	7.4079	5.17424	4.57794
sansomeana_SRR25655524	SAMN37004694	Soybean	Suceptible	shoots	sansomeana	Williams 82	mock	4 hpi	5.53701	6.77945	5.32228	4.0434	3.23129
sansomeana_SRR25655525	SAMN37004695	Soybean	Suceptible	shoots	sansomeana	Williams 82	Inoculated	2 hpi	5.93404	6.31788	5.51363	5.69772	3.4799
sansomeana_SRR25655526	SAMN37004696	Soybean	Suceptible	shoots	sansomeana	Williams 82	Inoculated	2 hpi	11.1964	15.5959	8.01905	7.89198	3.24931
sansomeana_SRR25655527	SAMN37004697	Soybean	Suceptible	shoots	sansomeana	Williams 82	mock	2 hpi	6.67181	7.08665	6.04305	4.9114	3.48209
sansomeana_SRR25655528	SAMN37004698	Soybean	Suceptible	shoots	sansomeana	Williams 82	mock	2 hpi	11.0982	14.788	11.2562	7.24861	2.96671
sansomeana_SRR25655529	SAMN37004699	Soybean	Suceptible	shoots	sansomeana	Senaki	Inoculated	16 hpi	8.05306	6.23113	7.1611	5.21428	4.66107
sansomeana_SRR25655530	SAMN37004700	Soybean	Suceptible	shoots	sansomeana	Senaki	Inoculated	16 hpi	6.82951	7.06322	6.25739	4.62205	3.38683
sansomeana_SRR25655531	SAMN37004701	Soybean	Suceptible	shoots	sansomeana	Senaki	mock	16 hpi	8.83356	8.27213	9.52673	6.77944	4.23659
sansomeana_SRR25655532	SAMN37004702	Soybean	Suceptible	shoots	sansomeana	Senaki	mock	16 hpi	7.4685	5.88423	7.2877	3.71217	3.69425
sansomeana_SRR25655533	SAMN37004703	Soybean	Suceptible	shoots	sansomeana	Senaki	Inoculated	8 hpi	7.38772	7.31624	9.55181	5.62626	3.88983
sansomeana_SRR25655534	SAMN37004704	Soybean	Suceptible	shoots	sansomeana	Senaki	Inoculated	8 hpi	7.66271	6.95463	8.4754	4.79356	3.6974
sansomeana_SRR25655535	SAMN37004705	Soybean	Suceptible	shoots	sansomeana	Senaki	mock	8 hpi	9.12594	8.38649	9.75253	5.56465	3.75827
sansomeana_SRR25655536	SAMN37004706	Soybean	Suceptible	shoots	sansomeana	Senaki	mock	8 hpi	7.94247	7.57716	9.46082	5.88062	4.18133
sansomeana_SRR25655537	SAMN37004707	Soybean	Suceptible	shoots	sansomeana	Senaki	Inoculated	4 hpi	7.77187	10.3944	6.6441	8.87889	3.66035
sansomeana_SRR25655538	SAMN37004708	Soybean	Suceptible	shoots	sansomeana	Senaki	Inoculated	4 hpi	7.33519	6.94504	4.94138	6.11935	3.89179
sansomeana_SRR25655539	SAMN37004709	Soybean	Suceptible	shoots	sansomeana	Senaki	mock	4 hpi	7.46134	7.56056	6.97552	7.37886	3.91475
sansomeana_SRR25655540	SAMN37004710	Soybean	Suceptible	shoots	sansomeana	Senaki	mock	4 hpi	6.06869	7.62133	5.35169	6.28312	4.08066
sansomeana_SRR25655541	SAMN37004711	Soybean	Suceptible	shoots	sansomeana	Senaki	Inoculated	2 hpi	5.65328	8.52957	6.82983	7.39493	2.63178
sansomeana_SRR25655542	SAMN37004712	Soybean	Suceptible	shoots	sansomeana	Senaki	Inoculated	2 hpi	6.26734	7.47264	5.40112	7.25128	3.98358
sansomeana_SRR25655543	SAMN37004713	Soybean	Suceptible	shoots	sansomeana	Senaki	mock	2 hpi	7.1824	7.3424	6.01123	7.38873	3.80941
sansomeana_SRR25655544	SAMN37004714	Soybean	Suceptible	shoots	sansomeana	Senaki	mock	2 hpi	4.76048	5.67138	4.58778	5.45385	2.16564
sansomeana_SRR25655545	SAMN37004715	Soybean	Resistant	shoots	sansomeana	NE2701N	Inoculated	16 hpi	9.08027	7.56284	10.2585	4.71652	4.46425
sansomeana_SRR25655546	SAMN37004716	Soybean	Resistant	shoots	sansomeana	NE2701N	Inoculated	16 hpi	6.50562	5.7974	5.89525	3.64469	3.70528
sansomeana_SRR25655547	SAMN37004717	Soybean	Resistant	shoots	sansomeana	NE2701N	mock	16 hpi	8.92623	7.18967	9.84532	4.19578	4.43133
sansomeana_SRR25655548	SAMN37004718	Soybean	Resistant	shoots	sansomeana	NE2701N	mock	16 hpi	5.72974	6.4711	7.99477	4.14258	2.54777
sansomeana_SRR25655549	SAMN37004719	Soybean	Resistant	shoots	sansomeana	NE2701N	Inoculated	8 hpi	9.22496	8.36574	9.6158	3.37664	4.67463
sansomeana_SRR25655550	SAMN37004720	Soybean	Resistant	shoots	sansomeana	NE2701N	Inoculated	8 hpi	7.19988	6.06509	7.74807	3.76278	4.90139
sansomeana_SRR25655551	SAMN37004721	Soybean	Resistant	shoots	sansomeana	NE2701N	mock	8 hpi	9.59445	9.76159	15.1281	3.77616	5.30078
sansomeana_SRR25655552	SAMN37004722	Soybean	Resistant	shoots	sansomeana	NE2701N	mock	8 hpi	7.55535	7.19457	7.43907	3.56071	3.93279
sansomeana_SRR25655553	SAMN37004723	Soybean	Resistant	shoots	sansomeana	NE2701N	Inoculated	4 hpi	5.7252	5.69541	6.93443	3.84926	4.12747
sansomeana_SRR25655554	SAMN37004724	Soybean	Resistant	shoots	sansomeana	NE2701N	Inoculated	4 hpi	3.38782	5.48728	1.32056	7.45973	4.32178
sansomeana_SRR25655555	SAMN37004725	Soybean	Resistant	shoots	sansomeana	NE2701N	mock	4 hpi	7.90479	7.0768	9.63825	5.03308	4.63078
sansomeana_SRR25655556	SAMN37004726	Soybean	Resistant	shoots	sansomeana	NE2701N	mock	4 hpi	9.12842	8.35313	10.4419	3.33757	4.29419
sansomeana_SRR25655557	SAMN37004727	Soybean	Resistant	shoots	sansomeana	NE2701N	Inoculated	2 hpi	6.59705	6.46469	7.73057	2.82937	1.92787
sansomeana_SRR25655558	SAMN37004728	Soybean	Resistant	shoots	sansomeana	NE2701N	Inoculated	2 hpi	3.58487	9.84261	5.56768	5.21464	2.3416
sansomeana_SRR25655559	SAMN37004729	Soybean	Resistant	shoots	sansomeana	NE2701N	mock	2 hpi	9.55674	6.31678	9.33856	2.71827	4.44952
sansomeana_SRR25655560	SAMN37004730	Soybean	Resistant	shoots	sansomeana	NE2701N	mock	2 hpi	9.05264	6.89867	9.11657	3.86468	4.42997
sansomeana_SRR25655561	SAMN37004731	Soybean	Resistant	shoots	sansomeana	Colfax	Inoculated	16 hpi	8.91777	6.24725	9.89471	5.06018	3.58943
sansomeana_SRR25655562	SAMN37004732	Soybean	Resistant	shoots	sansomeana	Colfax	Inoculated	16 hpi	6.58522	4.37522	9.70409	4.60249	3.18762
sansomeana_SRR25655563	SAMN37004733	Soybean	Resistant	shoots	sansomeana	Colfax	mock	16 hpi	10.1815	6.91382	9.58747	4.34971	4.14268
sansomeana_SRR25655564	SAMN37004734	Soybean	Resistant	shoots	sansomeana	Colfax	mock	16 hpi	6.09688	2.99537	5.57602	2.02282	2.62743
sansomeana_SRR25655565	SAMN37004735	Soybean	Resistant	shoots	sansomeana	Colfax	Inoculated	8 hpi	8.31983	5.38741	8.75622	3.76798	3.37824
sansomeana_SRR25655566	SAMN37004736	Soybean	Resistant	shoots	sansomeana	Colfax	Inoculated	8 hpi	8.95539	4.1246	8.85899	3.85599	4.46388
sansomeana_SRR25655567	SAMN37004737	Soybean	Resistant	shoots	sansomeana	Colfax	mock	8 hpi	13.3579	10.9154	12.8131	5.56208	3.87423
sansomeana_SRR25655568	SAMN37004738	Soybean	Resistant	shoots	sansomeana	Colfax	mock	8 hpi	7.98667	6.88753	11.7614	4.63952	3.7406
sansomeana_SRR25655569	SAMN37004739	Soybean	Resistant	shoots	sansomeana	Colfax	Inoculated	4 hpi	5.49749	7.11448	7.3158	4.42827	3.43882
sansomeana_SRR25655570	SAMN37004740	Soybean	Resistant	shoots	sansomeana	Colfax	Inoculated	4 hpi	7.73105	5.51387	7.47473	6.01549	5.35093
sansomeana_SRR25655571	SAMN37004741	Soybean	Resistant	shoots	sansomeana	Colfax	mock	4 hpi	8.90524	6.85292	8.2898	4.30772	3.16614
sansomeana_SRR25655572	SAMN37004742	Soybean	Resistant	shoots	sansomeana	Colfax	mock	4 hpi	9.78647	8.55366	9.57506	5.01571	4.12549
sansomeana_SRR25655573	SAMN37004743	Soybean	Resistant	shoots	sansomeana	Colfax	Inoculated	2 hpi	6.64763	6.17685	7.76132	5.18745	3.35344
sansomeana_SRR25655574	SAMN37004744	Soybean	Resistant	shoots	sansomeana	Colfax	Inoculated	2 hpi	7.2211	8.2416	9.03583	6.03865	1.99182
sansomeana_SRR25655575	SAMN37004745	Soybean	Resistant	shoots	sansomeana	Colfax	mock	2 hpi	6.69567	6.05118	5.89868	5.36334	2.87379
sansomeana_SRR25655576	SAMN37004746	Soybean	Resistant	shoots	sansomeana	Colfax	mock	2 hpi	5.68227	5.77949	8.68092	3.18119	1.83098
sansomeana_SRR25655577	SAMN37004683	Soybean	Suceptible	shoots	sansomeana	Williams 82	Inoculated	16 hpi	8.70452	8.83822	10.0634	5.01519	3.90889
sansomeana_SRR25655578	SAMN37004684	Soybean	Suceptible	shoots	sansomeana	Williams 82	Inoculated	16 hpi	7.72398	7.1364	7.65526	4.62331	3.75629
sansomeana_SRR25655579	SAMN37004685	Soybean	Suceptible	shoots	sansomeana	Williams 82	mock	16 hpi	9.56854	8.43593	9.77913	3.67356	3.45482
sansomeana_SRR25655580	SAMN37004686	Soybean	Suceptible	shoots	sansomeana	Williams 82	mock	16 hpi	6.99002	7.40594	10.3267	3.86318	2.99592
soy_db_SRR10198737	SAMN12868631	Soybean	Susceptible	roots	p_sojaeO	Misty	mock	14 DPI	11.231	14.4046	12.8863	4.8535	2.38296
soy_db_SRR10198738	SAMN12868630	Soybean	Susceptible	roots	p_sojaeO	Misty	mock	7 DPI	11.9698	11.848	8.93729	3.95617	3.34908
soy_db_SRR10198739	SAMN12868629	Soybean	Susceptible	roots	p_sojaeO	Misty	mock	7 DPI	9.60945	9.74584	6.8513	4.10463	3.37355
soy_db_SRR10198740	SAMN12868628	Soybean	Susceptible	roots	p_sojaeO	Misty	mock	7 DPI	10.4958	8.88431	7.684	4.18214	3.2103
soy_db_SRR10198741	SAMN12868673	Soybean	Resistant	roots	p_sojaeO	PI 449459	Inoculated	21 DPI	8.44955	5.96489	7.0532	3.22923	3.87028
soy_db_SRR10198742	SAMN12868672	Soybean	Resistant	roots	p_sojaeO	PI 449459	Inoculated	21 DPI	4.94856	4.61962	2.94764	2.22453	2.61357
soy_db_SRR10198743	SAMN12868627	Soybean	Susceptible	roots	p_sojaeO	Misty	mock	4 DPI	4.95461	5.65374	5.0848	2.96286	3.07061
soy_db_SRR10198744	SAMN12868671	Soybean	Resistant	roots	p_sojaeO	PI 449459	Inoculated	21 DPI	10.226	2.26157	2.46629	1.29993	0
soy_db_SRR10198745	SAMN12868670	Soybean	Resistant	roots	p_sojaeO	PI 449459	Inoculated	14 DPI	10.9264	3.3662	6.35439	3.82073	3.9293
soy_db_SRR10198746	SAMN12868669	Soybean	Resistant	roots	p_sojaeO	PI 449459	Inoculated	14 DPI	7.69667	3.31993	5.40557	3.15147	3.29294
soy_db_SRR10198747	SAMN12868668	Soybean	Resistant	roots	p_sojaeO	PI 449459	Inoculated	14 DPI	8.18494	2.97458	4.74963	3.83747	3.6943
soy_db_SRR10198748	SAMN12868667	Soybean	Resistant	roots	p_sojaeO	PI 449459	inoculated	7 DPI	5.92934	3.47161	3.23395	3.31469	3.25643
soy_db_SRR10198749	SAMN12868666	Soybean	Resistant	roots	p_sojaeO	PI 449459	Inoculated	7 DPI	7.82068	6.54214	5.30717	3.39094	3.23006
soy_db_SRR10198750	SAMN12868665	Soybean	Resistant	roots	p_sojaeO	PI 449459	Inoculated	7 DPI	9.77041	7.38943	3.57625	4.48299	3.85473
soy_db_SRR10198751	SAMN12868664	Soybean	Resistant	roots	p_sojaeO	PI 449459	Inoculated	4 DPI	12.7434	5.17739	13.4454	5.42903	4.23603
soy_db_SRR10198752	SAMN12868663	Soybean	Resistant	roots	p_sojaeO	PI 449459	Inoculated	4 DPI	16.1986	6.35712	16.0945	5.44078	5.28234
soy_db_SRR10198753	SAMN12868662	Soybean	Resistant	roots	p_sojaeO	PI 449459	Inoculated	4 DPI	5.93321	3.13654	3.50047	3.09965	3.17146
soy_db_SRR10198754	SAMN12868626	Soybean	Susceptible	roots	p_sojaeO	Misty	mock	4 DPI	4.94118	7.09211	6.44507	3.91823	2.6696
soy_db_SRR10198755	SAMN12868661	Soybean	Resistant	roots	p_sojaeO	PI 449459	mock	21 DPI	6.48034	4.79861	5.34633	3.26353	3.15867
soy_db_SRR10198756	SAMN12868660	Soybean	Resistant	roots	p_sojaeO	PI 449459	mock	21 DPI	9.15969	8.33362	11.4431	2.95729	2.70237
soy_db_SRR10198757	SAMN12868659	Soybean	Resistant	roots	p_sojaeO	PI 449459	mock	21 DPI	7.23399	8.14006	9.67772	2.51111	2.99983
soy_db_SRR10198758	SAMN12868658	Soybean	Resistant	roots	p_sojaeO	PI 449459	mock	14 DPI	7.32174	7.36619	9.32182	3.08899	2.5081
soy_db_SRR10198759	SAMN12868657	Soybean	Resistant	roots	p_sojaeO	PI 449459	mock	14 DPI	7.85312	8.6446	9.43656	3.3192	2.18971
soy_db_SRR10198760	SAMN12868656	Soybean	Resistant	roots	p_sojaeO	PI 449459	mock	14 DPI	8.7727	9.35617	12.1	3.54483	2.59607
soy_db_SRR10198761	SAMN12868655	Soybean	Resistant	roots	p_sojaeO	PI 449459	mock	7 DPI	8.55482	7.00129	8.7163	2.70973	1.87704
soy_db_SRR10198762	SAMN12868654	Soybean	Resistant	roots	p_sojaeO	PI 449459	mock	7 DPI	7.60295	7.57614	7.49443	2.72466	3.00787
soy_db_SRR10198763	SAMN12868653	Soybean	Resistant	roots	p_sojaeO	PI 449459	mock	7 DPI	8.7281	10.1525	8.78098	2.45679	2.03239
soy_db_SRR10198764	SAMN12868652	Soybean	Resistant	roots	p_sojaeO	PI 449459	mock	4 DPI	8.18578	7.76168	8.45923	2.73021	2.26225
soy_db_SRR10198765	SAMN12868625	Soybean	Susceptible	roots	p_sojaeO	Misty	mock	4 DPI	8.0428	7.46455	7.12627	4.21064	3.62421
soy_db_SRR10198766	SAMN12868651	Soybean	Resistant	roots	p_sojaeO	PI 449459	mock	4 DPI	7.31889	6.64019	6.49604	2.76805	3.06703
soy_db_SRR10198767	SAMN12868650	Soybean	Resistant	roots	p_sojaeO	PI 449459	mock	4 DPI	8.52354	8.91772	7.75534	3.54796	3.14005
soy_db_SRR10198768	SAMN12868649	Soybean	Resistant	roots	p_sojaeO	PI 449459	mock	0 DPI	5.02314	5.02157	2.23573	2.0473	2.99137
soy_db_SRR10198769	SAMN12868648	Soybean	Resistant	roots	p_sojaeO	PI 449459	mock	0 DPI	4.77491	4.26279	2.40364	2.41163	3.04833
soy_db_SRR10198770	SAMN12868647	Soybean	Resistant	roots	p_sojaeO	PI 449459	mock	0 DPI	5.1513	4.47928	2.43657	2.25664	2.67582
soy_db_SRR10198771	SAMN12868646	Soybean	Susceptible	roots	p_sojaeO	Misty	Inoculated	14 DPI	8.74875	5.79035	10.1369	4.1137	4.36874
soy_db_SRR10198772	SAMN12868645	Soybean	Susceptible	roots	p_sojaeO	Misty	Inoculated	14 DPI	14.2513	2.8119	5.47577	2.25121	3.78847
soy_db_SRR10198773	SAMN12868644	Soybean	Susceptible	roots	p_sojaeO	Misty	Inoculated	14 DPI	12.5274	4.07507	8.05312	3.62023	3.33836
soy_db_SRR10198774	SAMN12868643	Soybean	Susceptible	roots	p_sojaeO	Misty	Inoculated	14 DPI	7.25254	4.9745	6.76533	5.56672	3.49124
soy_db_SRR10198775	SAMN12868642	Soybean	Susceptible	roots	p_sojaeO	Misty	Inoculated	7 DPI	6.44923	4.78005	8.3586	4.40934	3.00271
soy_db_SRR10198776	SAMN12868624	Soybean	Susceptible	roots	p_sojaeO	Misty	mock	0 DPI	6.35643	5.88785	5.90502	3.20616	2.50384
soy_db_SRR10198777	SAMN12868641	Soybean	Susceptible	roots	p_sojaeO	Misty	Inoculated	7 DPI	18.7586	10.3482	8.84102	5.6118	4.83483
soy_db_SRR10198778	SAMN12868640	Soybean	Susceptible	roots	p_sojaeO	Misty	Inoculated	7 DPI	8.53268	6.8888	9.04367	5.505	3.41896
soy_db_SRR10198779	SAMN12868639	Soybean	Susceptible	roots	p_sojaeO	Misty	Inoculated	4 DPI	5.40329	3.45219	9.48925	4.71546	2.96042
soy_db_SRR10198780	SAMN12868638	Soybean	Susceptible	roots	p_sojaeO	Misty	Inoculated	4 DPI	6.83414	3.81684	8.09017	3.55347	3.09833
soy_db_SRR10198781	SAMN12868637	Soybean	Susceptible	roots	p_sojaeO	Misty	Inoculated	4 DPI	6.37886	4.07235	8.10247	4.41931	1.93167
soy_db_SRR10198782	SAMN12868636	Soybean	Susceptible	roots	p_sojaeO	Misty	mock	21 DPI	11.8047	13.7063	11.5945	3.86573	3.20166
soy_db_SRR10198783	SAMN12868635	Soybean	Susceptible	roots	p_sojaeO	Misty	mock	21 DPI	11.079	12.4908	10.4993	4.01296	3.38586
soy_db_SRR10198784	SAMN12868634	Soybean	Susceptible	roots	p_sojaeO	Misty	mock	21 DPI	11.8026	14.9394	11.6842	5.064	3.3752
soy_db_SRR10198785	SAMN12868633	Soybean	Susceptible	roots	p_sojaeO	Misty	mock	14 DPI	10.285	10.1553	10.0509	4.01614	3.03306
soy_db_SRR10198786	SAMN12868632	Soybean	Susceptible	roots	p_sojaeO	Misty	mock	14 DPI	12.6074	13.6095	11.7212	4.13074	2.93668
soy_db_SRR10198787	SAMN12868623	Soybean	Susceptible	roots	p_sojaeO	Misty	mock	0 DPI	7.5779	6.88651	6.84529	3.82694	2.94828
soy_db_SRR10198788	SAMN12868622	Soybean	Susceptible	roots	p_sojaeO	Misty	mock	0 DPI	8.26236	8.66986	6.83974	3.63337	2.79398
